# Supplementary material for: Genomic-based taxonomic classification of the order Sphingomonadales
Source: Int J Syst Evol Microbiol. 2025 May 14;75(5):006769. doi: 10.1099/ijsem.0.006769 (PMC12210278; doi:10.1099/ijsem.0.006769)
Supplement: Supplementary Material 2. [file ijsem-75-06769-s002.xlsx]

## Sheet: Table S1
Table S1. Genomic quality, sieze and G+C contents of Sphingomadales type strain genomes in this study.
Type Strain	Completeness (%)	Contamination (%)	Contigs	Size (bp)	G+C content (%)
Actirhodobacter atriluteus HHU K3-1T (GCA_013370205)	98.7941	0.65334	23	2939611	62.0631
Allosphingosinicella indica Dd16T (GCA_900177405)	99.1304	0.289855	1	2807353	67.0257
Allosphingosinicella vermicomposti KCTC 22446T (GCA_003012815)	98.6957	0.144928	6	2507679	62.3908
Alteraurantiacibacter aestuarii JCM 16339T (GCA_009827405)	64.9867	0.238908	5	2241463	62.5669
Alteraurantiacibacter aquimixticola SSKS-13T (GCA_004965515)	98.7941	0.20857	5	3433901	63.9296
Alteraurantiacibacter buctensis M0322T (GCA_009827655)	98.9078	0.511945	24	3772944	66.0518
Altererythrobacter aquiaggeris KCTC 52471T (GCA_037154015)	99.5904	0.195027	2	2644226	58.802
Altererythrobacter epoxidivorans CGMCC 1.7731T (GCA_001281485)	99.2491	1.31156	1	2786256	61.5027
Altererythrobacter fulvus KACC 19119T (GCA_037154085)	99.4767	0.864619	11	3516177	63.7959
Altererythrobacter insulae BPTF-M16T (GCA_003444655)	98.404	12.8	1055	3320111	52.8311
Altererythrobacter ishigakiensis NBRC 107699T (GCA_001663155)	98.8591	0.731351	1	2673978	56.8832
Altererythrobacter lauratis KCTC 52606T (GCA_037154155)	99.0216	0.0796359	32	3095759	64.5305
Altererythrobacter lutimaris JGD-16T (GCA_013371495)	99.2248	1.2758	34	2952860	57.7506
Altererythrobacter palmitatis KCTC 52607T (GCA_037154115)	98.6803	0.0853242	22	3208183	64.4429
Altererythrobacter xiamenensis CGMCC 1.12494T (GCA_900177715)	99.1354	0.341297	5	3082408	61.7782
Altericroceibacterium endophyticum LMG 29518T (GCA_009827595)	99.3174	0.341297	13	3474520	58.6099
Altericroceibacterium indicum DSM 18604T (GCA_009828105)	99.4312	0.877621	20	3106258	55.8434
Altericroceibacterium spongiae HN-Y73T (GCA_003610805)	98.5666	0.953624	34	3654751	57.602
Alteripontixanthobacter maritimus HME9302T (GCA_003340475)	99.2491	1.70648	2	2676898	60.815
Alteripontixanthobacter muriae SALINAS58T (GCA_013336795)	98.7713	0.523322	79	2863572	61.382
Alteriqipengyuania abyssalis NZ-12BT (GCA_019857185)	98.9078	0	8	3099119	65.3649
Alteriqipengyuania halimionae LMG 29519T (GCA_009827575)	99.2491	0.455063	2	2808696	63.612
Alteriqipengyuania lutimaris S-5T (GCA_003363135)	99.4767	0.341297	12	3290764	65.389
Aquisediminimonas profunda DS48-3T (GCA_019443285)	98.4783	0.434783	1	3406525	58.4676
Aquisediminimonas sediminicola CH68-4T (GCA_019740335)	99.5652	0	13	3010713	58.7836
Aurantiacibacter aquimixticola JSSK-14T (GCA_003605475)	99.2491	1.19454	2	2552891	62.9609
Aurantiacibacter arachoides RC4-10-4T (GCA_009827335)	99.5417	0.365675	1	2941591	65.4032
Aurantiacibacter atlanticus s21-N3T (GCA_001077815)	99.1354	1.0824	2	3226359	58.3338
Aurantiacibacter gangjinensis CGMCC 1.15024T (GCA_001886695)	99.2491	0.341297	2	2724951	62.7129
Aurantiacibacter luteus KA37T (GCA_001010945)	99.5417	0	22	2887216	67.1706
Aurantiacibacter marinus KCTC 23554T (GCA_001021555)	99.2491	0.365675	5	2835898	59.1048
Aurantiacibacter odishensis KCTC 23981T (GCA_003605195)	99.5904	0.341297	25	3188505	63.739
Aurantiacibacter rhizosphaerae GH3-10T (GCA_009807005)	99.818	1.02389	6	3418029	61.3133
Aurantiacibacter sediminis JGD-13T (GCA_016019885)	99.0866	0.881684	15	2668619	60.1951
Aurantiacibacter spongiae HN-E23T (GCA_003815535)	99.7611	0.341297	2	2855855	65.507
Aurantiacibacter suaedae GH3-15T (GCA_005434915)	99.5661	0.341297	9	3258548	63.394
Aurantiacibacter xanthus CCTCC AB 2015396T (GCA_003584015)	99.2491	0.536324	151	4380877	64.4961
Aurantiacibacter zhengii V18T (GCA_003584125)	99.9317	2.95791	29	3803809	62.6531
Blastomonas aquatica CGMCC 1.12851T (GCA_014639875)	99.83	1.65	24	3712001	62.5
Blastomonas fulva T2T (GCA_003431825)	99.5449	2.04778	2	4123210	64.1656
Blastomonas marina CGMCC 1.15297T (GCA_014641655)	99.0671	0.341297	67	2634902	64.9401
Blastomonas natatoria DSM 3183T (GCA_003201955)	99.5449	1.02389	55	4045865	63.3691
Blastomonas ursincola KR-99T (GCA_013607875)	99.6587	0.341297	22	3807031	64.6963
Caenibius tardaugens NBRC 16725T (GCA_003860345)	97.5711	1.68942	1	4358096	61.2484
Chakrabartia godavariana KCTC 52678T (GCA_005518185)	100	0	6	3168918	63.7809
Chioneia algoris R-39594T (Ga0427589)	100	0	20	3068763	68.1864
Chioneia brumae R-39161T (Ga0427977)	99.7826	0	15	3041672	68.8948
Chioneia frigida R-67880T (Ga0401290)	100	0	41	4360754	67.4085
Chioneia hiemis R-36677T (Ga0401292)	99.5652	0	21	3764967	67.7609
Croceibacterium atlanticum 26DY36T (GCA_001008165)	99.4767	0.5477	2	3475106	61.9105
Croceibacterium ferulae SX2RGS8T (GCA_003660445)	97.6239	1.09215	36	3608511	66.5312
Croceibacterium mercuriale CoronadoT (GCA_000802385)	98.079	0.409556	10	3482341	67.2956
Croceibacterium salegens MCCC 1K01500T (GCA_009827435)	99.2573	0.666883	69	3636778	64.5978
Croceibacterium soli MCCC 1K02066T (GCA_009828065)	99.6099	0	15	3084697	66.9728
Croceibacterium xixiisoli S36T (GCA_009827305)	99.4279	2.34821	9	3879280	63.3463
Croceicoccus bisphenolivorans H4T (GCA_001634625)	99.6343	0.750853	74	3602538	62.7616
Croceicoccus estronivorus MH-B5T (GCA_001625325)	98.0887	0.853242	25	3668441	59.9912
Croceicoccus gelatinilyticus 1NDH52T (GCA_018398395)	99.293	2.3322	43	3790455	62.6154
Croceicoccus hydrothermalis JLT1T (GCA_022378335)	98.3514	1.73086	99	3556066	63.2626
Croceicoccus marinus E4A9T (GCA_001661675)	99.5856	1.87713	3	4109188	64.5111
Croceicoccus mobilis Ery22T (GCA_001661965)	99.3467	2.73038	32	4210079	62.5414
Croceicoccus naphthovorans PQ-2T (GCA_001028705)	99.4637	0.324232	3	3863562	62.608
Croceicoccus pelagius Ery9T (GCA_001661915)	99.293	0.523322	41	3306530	62.809
Croceicoccus ponticola GM-16T (GCA_004004515)	98.9404	0.0682594	17	3244470	62.1331
Croceicoccus sediminis S2-4-2T (GCA_007570835)	99.5206	0.967008	9	3548496	63.0176
Erythrobacter ani WH131T (GCA_019204025)	99.3629	0	7	3153164	59.7034
Erythrobacter aurantius C5T (GCA_023823125)	99.883	0.625711	1	3422084	61.6332
Erythrobacter colymbi JCM 18338T (GCA_002155685)	99.306	0.910125	53	4309205	66.4736
Erythrobacter crassostreae WH158T (GCA_019204045)	86.9625	0.767918	7	2586581	56.6374
Erythrobacter cryptus DSM 12079T (GCA_000422985)	99.4767	0	36	2954426	67.8541
Erythrobacter dokdonensis DSM 17193T (GCA_002155305)	99.2947	0	13	2996446	64.7901
Erythrobacter donghaensis DSM 16220T (GCA_002155425)	99.4767	1.02389	11	3372281	66.2217
Erythrobacter insulae JBTF-M21T (GCA_007004095)	99.4767	0.341297	3	2986343	56.9952
Erythrobacter litoralis DSM 8509T (GCA_001719165)	99.2491	0.938567	1	3251353	65.1885
Erythrobacter longus DSM 6997T (GCA_000715015)	99.5904	0.598624	14	3602162	57.3677
Erythrobacter neustonensis DSM 9434T (GCA_001663175)	99.4767	0.341297	1	3090363	65.2518
Erythrobacter ramosus JCM 10282T (GCA_009828055)	99.5449	1.06181	13	3240350	64.3039
Erythrobacter rubeus KMU-140T (GCA_014705715)	98.7941	0.170648	7	3042712	60.5846
Erythrobacter sanguineus JCM 20691T (GCA_002155655)	99.5904	0.341297	38	3018761	63.6214
Erythrobacter tepidarius DSM 10594T (GCA_002155695)	99.5449	0	32	3216818	65.882
Glacieibacterium frigidum LB1R16T (GCA_007097155)	100	0	3	3428851	68.8448
Hephaestia caeni DSM 25527T (GCA_003550065)	99.6587	3.74079	13	4524961	65.5583
Hephaestia mangrovi CMS5P-6T (GCA_019880555)	99.3743	1.05233	24	3788905	65.5686
Novosphingobium acidiphilum DSM 19966T (GCA_000429005)	99.9317	0	55	3709060	64.2588
Novosphingobium aerophilum 4Y4T (GCA_014230305)	99.7497	0.113766	119	4188563	67.612
Novosphingobium aquaticum CCM 7983T (GCM10007317)	99.306	1.35706	57	4377191	63.9799
Novosphingobium aquiterrae NCAIM B 02537T (GCM10007080)	99.818	0.255973	11	3287286	64.6501
Novosphingobium aromaticivorans DSM 12444T (GCA_000013325)	99.818	0	3	4233314	65.1126
Novosphingobium arvoryzae KCTC 32422T (GCA_014652615)	99.4767	0.341297	35	3285341	65.3598
Novosphingobium aureum YJ-S2-02T (GCA_015865035)	99.0785	0.170648	39	4342390	65.5478
Novosphingobium barchaimii LL02T (GCA_001046635)	99.818	2.13311	25	5313474	64.0201
Novosphingobium bradum KCTC 42984T (GCM10019133)	97.8271	0.365675	30	3132891	68.655
Novosphingobium capsulatum NBRC 12533T (GCA_001598375)	99.4198	0.682594	70	4836455	65.7213
Novosphingobium chloroacetimidivorans CCTCC AB 2013086T (GCM10030111 )	99.9317	1.19454	88	4613864	65.2728
Novosphingobium clariflavum 164T (GCA_026420865)	99.4767	1.02389	130	5251955	65.7208
Novosphingobium colocasiae KCTC 32255T (GCA_014652555)	99.0785	0.796359	81	3778500	65.1928
Novosphingobium decolorationis 502str22T (GCA_018417475)	99.7611	1.21892	2	4750375	65.512
Novosphingobium endophyticum CGMCC 1.15095T (GCA_014640675)	99.2491	1.87713	122	4345016	64.2193
Novosphingobium flavum NBRC 111647T (GCA_014230315)	97.884	2.13311	26	4104972	66.7106
Novosphingobium fluoreni DSM 27568T (GCA_014196615)	99.7611	0	26	3610184	63.41
Novosphingobium fuchskuhlense FNE08-7T (GCA_001519075)	99.4767	0.665529	48	4778012	64.8922
Novosphingobium gossypii CCM 8569T (GCM10007347)	99.5904	2.20137	116	5966702	63.4991
Novosphingobium guangzhouense SA925T (GCA_002896965)	99.6587	2.09654	64	4410114	62.7204
Novosphingobium hassiacum DSM 14552T (GCA_014196055)	99.5904	0.682594	55	3672189	68.3827
Novosphingobium huizhouense C7T (GCA_020179475.1)	95.49	1.7	55	3672189	68.5
Novosphingobium humi KACC 19094T (GCA_028607105)	99.4596	1.13766	4	4890578	63.5587
Novosphingobium indicum CGMCC 1.6784T (GCA_014645195)	99.9317	1.19454	108	4961652	63.0515
Novosphingobium ipomoeae KCTC 42656T (GCM10017100)	99.818	0.390054	4	3303157	62.0865
Novosphingobium jiangmenense 1Y9AT (GCA_015694345)	99.6587	0.682594	31	4080833	64.6533
Novosphingobium kunmingense CGMCC 1.12274T (GCA_002813245)	99.4767	0.511945	10	3495912	65.7262
Novosphingobium lentum NBRC 107847T (GCA_001590965)	99.6587	0.255973	53	4407848	65.7388
Novosphingobium lindaniclasticum LE124T (GCA_000445125)	99.4767	1.48843	156	4857928	64.5516
Novosphingobium malaysiense MUSC 273T (GCA_000802225)	99.883	0.767918	85	5027021	63.3575
Novosphingobium marinum CGMCC 1.12918T (GCA_014640055)	98.9647	0.511945	27	3590209	64.2035
Novosphingobium mathurense SM117T (GCA_900168325)	99.7611	1.13766	38	4843551	63.2633
Novosphingobium meiothermophilum SYSU G00007T (GCA_003171715)	99.3174	0	20	3474569	64.2524
Novosphingobium naphthalenivorans NBRC 102051T (GCA_001590985)	99.9317	0.853242	234	5236092	63.8224
Novosphingobium nitrogenifigens DSM 19370T (GCA_000192575)	99.4767	0	77	4182647	63.9544
Novosphingobium olei TW-4T (GCA_012927405)	99.9317	0.426621	45	4683467	65.0059
Novosphingobium ovatum FSY-8T (GCA_009909235)	98.4642	0.731351	15	3579308	64.8398
Novosphingobium panipatense CCM 7472T (GCM10011473)	99.5904	0.414432	48	4219425	64.1768
Novosphingobium pentaromativorans US6-1T (GCA_000767465)	99.9317	0.938567	6	5457578	63.0187
Novosphingobium percolationis c1T (GCA_020179425)	99.9317	2.0857	41	4297598	66.112
Novosphingobium piscinae KCTC 42194T (GCA_014230355)	99.4767	0	45	3775046	68.8235
Novosphingobium pokkalii KCTC 42224T (GCA_014652855)	99.9117	0.390054	75	4674965	66.474
Novosphingobium resinovorum VKM B-1172T (GCA_027922145)	86.7088	2.09898	4	5598009	65.2739
Novosphingobium rhizosphaerae CCM 8547T (GCM10007345)	99.741	1.02389	46	5404405	65.8093
Novosphingobium rosa NBRC 15208T (GCA_001598555)	99.5904	5.44369	194	6952763	64.5064
Novosphingobium sediminicola DSM 27057T (GCA_007991615)	96.41	4.87	56	5372701	63
Novosphingobium silvae FGD1T (GCA_009856825)	99.5904	1.22298	65	4579145	65.0717
Novosphingobium soli CCM 7706T (GCM10007280)	99.306	0.138144	4305	4056177	68.5013
Novosphingobium subterraneum DSM 12447T (GCA_000807925)	99.4767	0	54	4885942	63.2172
Novosphingobium taihuense CGMCC 1.3432T (GCA_007830315)	99.818	0.796359	32	4479233	63.0256
Novosphingobium umbonatum FSY-9T (GCA_004005905)	98.6917	1.02389	91	4088502	61.4524
Novosphingopyxis baekryungensis DSM 16222T (GCA_000420305)	99.818	0	10	3068208	62.389
Novosphingopyxis iocasae PB63T (GCA_014334095)	99.4767	0.560702	1	3191507	62.808
Pacificimonas flava JLT2015T (GCA_000342165)	100	0	38	3253933	64.2253
Parapontixanthobacter aurantiacus MCCC 1A09962T (GCA_009827635)	94.65	3.46	7	2895130	61
Parasphingopyxis algicola JCM 31719T (GCM10018083)	98.8623	0.731351	1	3669801	63.3266
Parasphingopyxis lamellibrachiae DSM 26725T (GCA_003385775)	99.4767	1.09703	15	2947125	60.4345
Parasphingopyxis marina GrpM-11T (GCA_014237875)	99.1354	0.948047	5	3306929	63.718
Parasphingorhabdus cellanae JHSY0214T (GCA_017498565)	98.9647	0.341297	1	3777952	52.7534
Parasphingorhabdus flavimaris DSM 16223T (GCM10018721)	99.0899	0.333171	8	3349176	57.4868
Parasphingorhabdus litoris DSM 22379T (GCA_020906275)	99.1354	0.877621	1	3610303	52.7031
Parasphingorhabdus marina DSM 22363T (GCA_900128895)	99.5904	0.170648	2	3547928	57.3622
Paraurantiacibacter namhicola JCM 16345T (GCA_001687545)	99.5449	0	1	2591679	65.0122
Parerythrobacter jejuensis JCM 16677T (GCA_009827995)	98.2759	25.8621	1	4149941	60.177
Parerythrobacter lutipelagi GH1-16T (GCA_005434975)	99.5904	0.560702	2	3097651	60.6243
Pedomonas mirosovicensis A1X5R2T (GCA_022569295)	98.7391	1.73913	2	3631465	64.9928
Pelagerythrobacter aerophilus Ery1T (GCA_003581645)	99.6386	5.98489	19	3653105	65.3966
Pelagerythrobacter marensis KCTC 22370T (GCA_001028625)	99.4767	0.617585	1	2885033	64.6541
Pelagerythrobacter marinus H32T (GCA_009827515)	99.4312	0.268162	16	3001465	68.1773
Pelagerythrobacter rhizovicinus AY-3RT (GCA_004135625)	99.6587	0.706972	3	3007728	66.3448
Polymorphobacter arshaanensis DJ1R-1T (GCA_004681125)	100	0.434783	11	3257822	64.9794
Polymorphobacter fuscus D40PT (GCA_009607675)	99.5652	0.652174	16	3371741	66.8435
Polymorphobacter glacialis CGMCC 1.15519T (GCA_014643455)	98.913	0	40	3317434	65.454
Polymorphobacter megasporae PAMC 29362T (GCA_018982885)	99.5652	0.869565	3	4894723	65.4612
Polymorphobacter multimanifer JCM 18140T (GCA_014647295)	94.2422	0	559	3840240	65.8801
Pontixanthobacter aestiaquae KCTC 42006T (GCA_009827455)	98.5097	0.170648	2	2868693	57.1541
Pontixanthobacter aquaemixtae KCTC 52763T (GCA_009827395)	99.0216	1.07265	4	2983943	58.4688
Pontixanthobacter confluentis KCTC 52259T (GCA_009827615)	99.3629	0.0926377	5	2934197	59.0716
Pontixanthobacter gangjinensis JCM 17802T (GCA_009827545)	99.2491	0.0243784	2	2888119	55.4667
Pontixanthobacter luteolus SW-109T (GCA_009828095)	99.9317	0.341297	4	2887613	59.3159
Pontixanthobacter rizhaonensis RZ02T (GCA_012972675)	99.0501	0.170648	4	2790898	55.4887
Pontixanthobacter sediminis KCTC 42453T (GCA_009828115)	99.2491	0.219405	6	3158912	61.5402
Pseudopontixanthobacter vadosimaris JL3514T (GCA_012979275)	98.9761	0.796359	43	2629682	63.0231
Qipengyuania aerophila GH25T (GCA_019711555)	99.9317	0.341297	7	3168876	60.7345
Qipengyuania aestuarii GH1T (GCA_019711535)	99.4566	0.682594	4	2932179	61.0861
Qipengyuania algicida KEMB 9005-328T (GCA_009828025)	99.8862	1.02389	21	3215496	60.7372
Qipengyuania aquimaris JCM 12189T (GCA_009827445)	99.6473	0	3	2662510	61.7731
Qipengyuania aurantiaca 1NDH13T (GCA_019711375)	99.818	0	1	2825589	63.8052
Qipengyuania citrea CGMCC 1.8703T (GCA_009828015)	99.818	0.352673	24	3031321	64.1889
Qipengyuania flava DSM 16421T (GCA_011762005)	99.818	0.170648	7	2813855	63.8871
Qipengyuania gaetbuli DSM 16225T (GCA_009827315)	99.818	0.341297	4	2780525	64.0861
Qipengyuania gelatinilytica 1NDH1T (GCA_019711315)	99.4767	0.853242	1	2832299	62.6859
Qipengyuania huizhouensis YG19T (GCA_019711635)	99.2207	0	27	2549524	60.665
Qipengyuania intermedia GH38T (GCA_019711615)	99.306	0	4	2697527	62.4652
Qipengyuania marisﬂavi KEM-5T (GCA_005884405)	99.9317	0	18	2669685	61.7332
Qipengyuania mesophila YG27T (GCA_019711655)	99.818	0.552576	8	3135996	64.9898
Qipengyuania nanhaisediminis CGMCC 1.7715T (GCA_900115585)	99.7611	0.0682594	13	2899438	61.9619
Qipengyuania oceanensis MCCC 1A09965T (GCA_009827535)	99.2036	0.190725	14	2874198	63.9209
Qipengyuania pacifica NZ-96T (GCA_019857205)	99.9317	0.938567	54	3497702	60.7517
Qipengyuania pelagi JCM 17468T (GCA_009827295)	99.5417	0	9	3031738	64.2108
Qipengyuania polymorpha 1NDH17T (GCA_019711435)	99.4767	0	8	2845713	63.2499
Qipengyuania proteolytica 6B39T (GCA_019711565)	99.5904	0.0682594	7	3112260	64.9756
Qipengyuania psychrotolerans 1XM2-8T (GCA_019711355)	99.818	0.341297	1	2744056	60.1098
Qipengyuania qiaonensis 6D47AT (GCA_019711515)	99.306	1.02389	33	3393087	61.9628
Qipengyuania sediminis CGMCC 1.12928T (GCA_004358425)	99.5222	0.170648	1	2416000	66.7514
Qipengyuania seohaensis SW-135T (GCA_002795865)	99.818	0.0682594	1	2942673	61.6506
Qipengyuania soli 6D36T (GCA_015529805)	99.7042	0.901999	1	2910144	63.3214
Qipengyuania sphaerica GH29T (GCA_019711595)	99.5904	0.170648	5	2837629	62.6478
Qipengyuania vesicularis 1NDH10T (GCA_019711415)	99.4767	0.682594	4	2714485	62.4527
Qipengyuania vulgaris DSM 17792T (GCA_009827325)	98.9078	0	19	3233171	60.6
Qipengyuania xiapuensis 1NDW3T (GCA_019711335)	99.4767	0.511945	2	2713266	63.5391
Rhizorhabdus argentea DSM 100912T (GCA_037861105)	99.095	0.467572	57	4283009	63.5991
Rhizorhabdus dicambivorans Ndbn-20T (GCA_002355275)	99.095	0.904977	5	5541299	65.3487
Rhizorhabdus histidinilytica UM2T (GCA_900167915)	99.095	0.904977	59	5473339	67.3539
Rhizorhabdus phycosphaerae MK52T (GCA_011044255)	99.5475	0	1	4327794	65.4967
Rhizorhabdus wittichii RW1T (GCA_000016765)	99.095	1.80995	3	5915246	67.9012
Rhizorhapis suberifaciens DSM 7465T (GCA_014200045)	99.1468	0.796359	35	3360228	59.0784
Sandaracinobacteroides hominis SZY PN-1T (GCA_016464365)	100	0.869565	22	3530208	65.0159
Sandaracinobacteroides saxicola M6T (GCA_016464365)	99.1304	0.57971	1	3364212	67.6493
Sandaracinobacteroides sayramensis RS1-74T (GCA_022014495)	99.6957	0.652174	42	3821644	66.4748
Sandarakinorhabdus cyanobacteriorum TH057T (GCA_002251755)	99.5652	0	131	3532745	66.1574
Sandarakinorhabdus limnophila DSM 17366T (GCA_000420765)	99.5652	0.434783	11	2613739	64.487
Sandarakinorhabdus oryzae NM-18T (GCA_009733735)	98.0435	0.869565	431	3265630	66.5572
Sandarakinorhabdus rubra MO-4T (GCA_010994245)	97.8986	1.82609	485	2815513	67.6453
Sphingoaurantiacus capsulatus KCTC 42644T (GCM10017054)	100	0	22	3701098	67.7376
Sphingobium abikonense NBRC 16140T (GCA_001598335)	99.6587	0	50	3749280	63.5128
Sphingobium algorifonticola TLA-22T (GCA_004005485)	99.5222	0.0853242	35	3843870	63.1728
Sphingobium amiense DSM 16289T (GCA_003967075)	99.6587	1.19454	7	4773922	64.6313
Sphingobium aquiterrae DSM 106441T (GCA_037154135)	99.6587	1.39363	56	4995461	64.9119
Sphingobium aromaticiconvertens DSM 12677T (GCA_037154075)	99.7611	2.13669	6	5453086	62.2415
Sphingobium baderi LL03T (GCA_000445145)	99.5904	2.04778	92	4848286	63.5508
Sphingobium bisphenolivorans YL23T (GCA_000412635)	99.8862	0.59727	67	3800099	63.7046
Sphingobium boeckii DSM 25079T (GCA_014199215)	99.9317	1.47489	14	4031522	62.0151
Sphingobium chlorophenolicum NBRC 16172T (GCA_000722875)	99.6587	1.53584	129	4796122	64.2854
Sphingobium chungbukense DJ77T (GCA_001005725)	99.5449	2.26719	40	5516495	63.3182
Sphingobium cloacae JCM 10874T (GCA_002355855)	99.6587	1.87144	7	4547566	64.4455
Sphingobium cupriresistens CCTCC AB 2011146T (GCA_004152865)	99.3174	1.66992	158	4382818	63.8715
Sphingobium estronivorans AXBT (GCA_008692605)	99.8862	2.67952	79	4510523	63.5679
Sphingobium faniae CGMCC 1.7749T (GCA_900100475)	99.6587	2.02259	95	4840393	63.2745
Sphingobium fluviale CHR27T (GCA_004122115)	98.1115	0.170648	48	3068982	61.8584
Sphingobium fontiphilum DSM 29348T (GCA_014196635)	99.6587	0	19	3410606	64.4855
Sphingobium fuliginis DSM 18781T (GCA_004152845)	100	1.6496	21	4595643	64.8927
Sphingobium herbicidovorans MHT (GCA_002080435)	98.8623	1.6041	5	4240798	62.4637
Sphingobium indicum B90AT (GCA_000264945)	100	0.725662	4	3945731	65.0093
Sphingobium jiangsuense NBRC 112973T (GCA_030161155)	99.6473	0.59727	69	4819475	65.9932
Sphingobium lactosutens DS20T (GCA_000445105)	100	2.21843	110	5360246	63.0112
Sphingobium lignivorans B1D3AT (GCA_014203955)	99.6587	0.170648	1	4207152	65.6159
Sphingobium limneticum DSM 25076T (GCA_008710155)	99.6587	1.45783	109	5092581	63.2424
Sphingobium mellinum DSM 7458T (GCA_037860795)	99.1354	0.874099	55	3767061	63.2043
Sphingobium naphthae JCM 31713T (GCA_033032805)	99.8862	1.02389	48	4285276	65.3094
Sphingobium olei DSM 18999T (GCM10014940)	99.3174	1.02389	103	4436749	64.5491
Sphingobium phenoxybenzoativorans SC 3T (GCA_001757355)	99.1468	1.39363	202	5039171	62.2072
Sphingobium psychrophilum AR-3-1T (GCA_012927105)	99.6587	1.32002	83	5162327	63.1484
Sphingobium quisquiliarum P25T (GCA_000445065)	99.4767	0.970258	181	4170546	63.9582
Sphingobium rhizovicinum CCM 7491T (GCM10007244)	99.3174	3.22444	4965	4662156	63.8858
Sphingobium scionense ICMP 13533T (GCA_014197035)	99.0216	2.26719	106	5959969	64.0961
Sphingobium subterraneum DSM 102255T (GCA_014199435)	98.8623	2.13311	34	3748342	62.2207
Sphingobium sufflavum KCTC 23953T (GCA_021403115)	98.9818	1.02389	37	4430016	64.8978
Sphingobium terrigena EO9T (GCA_003591655)	99.3174	1.70648	95	5043023	62.7754
Sphingobium ummariense RL-3T (GCA_000447205)	100	1.09215	139	4754053	65.0105
Sphingobium vermicomposti DSM 21299T (GCA_011762025)	99.4767	1.05558	6	3389096	62.1846
Sphingobium wenxiniae CGMCC 1.7748T (GCA_007830065)	99.5904	1.10922	89	4096449	63.868
Sphingobium xanthum DSM 100901T (GCA_019737615)	99.4767	0.255973	24	4063133	64.6203
Sphingobium xenophagum NBRC 107872T (GCM10017330)	99.6587	0.853242	138	4486420	62.9238
Sphingobium yanoikuyae ATCC 51230T (GCA_000315525)	99.3629	0.682594	28	5532579	64.3891
Sphingomicrobium aestuariivivum KCTC 42286T (GCA_024721585)	98.3628	0.221239	1	2345960	66.4424
Sphingomicrobium arenosum KCTC 62233T (GCA_026157085)	98.3628	0.221239	3	2558758	65.4043
Sphingomicrobium astaxanthinifaciens JCM 18551T (GCA_026157155)	97.9204	0.221239	5	2249836	68.3406
Sphingomicrobium flavum JCM 18555T (GCA_024721605)	98.4513	0	1	2339771	63.0421
Sphingomicrobium lutaoense DSM 24194T (GCA_014195685)	98.3628	0	4	2079099	63.8666
Sphingomicrobium marinum JCM 18554T (GCA_026157105)	97.9565	0	2	2238205	62.2847
Sphingomonas abaci DSM 15867T (GCA_014199625)	99.485	1.63254	44	4412857	67.9014
Sphingomonas adhaesiva DSM 7418T (GCA_002374855)	99.6587	0.511945	36	3760237	69.1462
Sphingomonas aerolata NW12T (GCA_003046295)	99.6587	0.536324	7	3827482	66.4727
Sphingomonas aerophila DSM 100044T (GCA_014199305)	98.9249	1.39363	32	4006294	65.1054
Sphingomonas aestuarii DSM 19475T (GCM10014947)	99.2404	1.03852	20	2985908	64.533
Sphingomonas agri LMG 29563T (GCA_038148795)	99.7788	0.737463	4	2868910	62.6819
Sphingomonas albertensis DOAB 1063T (GCA_014358075)	95.1706	0.195027	80	4057404	65.674
Sphingomonas aliaeris DH-S5T (GCA_016743815)	97.3406	0.942777	3	4262007	64.378
Sphingomonas alpina DSM 22537T (GCA_014490665)	99.1267	2.0104	1	5197460	63.9669
Sphingomonas antarctica CCTCC AB 2016064T (GCM10025571)	99.6587	1.04827	63	3606590	65.1834
Sphingomonas aquatilis NBRC 16722T (GCA_007990915)	99.3743	0.79961	244	3932334	67.0725
Sphingomonas aracearum WZY 27T (GCA_003345355)	98.6686	0.682594	14	3642894	68.2609
Sphingomonas arantia CGMCC 1.12702T (GCM10020237)	99.5475	0.452489	10	3843281	67.5886
Sphingomonas arenae SYSUD00720T (GCA_016924655)	98.1195	0	5	2756351	65.9517
Sphingomonas asaccharolytica NBRC 15499T (GCA_001598355)	99.5734	3.06355	191	4608803	64.636
Sphingomonas astaxanthinifaciens DSM 22298T (GCA_000711715)	100	0	3	2533034	68.4015
Sphingomonas aurantiaca MA101bT (GCA_003050705)	99.6587	1.31562	15	4411230	66.1728
Sphingomonas azotifigens NBRC 15497T (GCA_002091475)	99.6587	1.17341	163	5145744	67.3148
Sphingomonas baiyangensis L-1-4 w-11T (GCA_005144715)	99.6587	0.731351	7	3268803	67.8065
Sphingomonas canadensis FWC47T (GCA_026013525)	98.9761	1.15635	26	4194498	68.288
Sphingomonas cannabina DM2-R-LB4T (GCA_021391395)	99.6587	1.30424	1	4386171	67.8562
Sphingomonas carotinifaciens DSM 27347T (GCA_009789535)	99.5704	2.23306	7	4094655	66.8997
Sphingomonas cavernae K2R01-6T (GCA_003590775)	99.5652	0.434783	5	4244097	63.8993
Sphingomonas changbaiensis NBRC 104936T (GCA_000974765)	99.3478	0.594203	53	3217375	66.2859
Sphingomonas chungangi CGMCC 1.13654T (GCA_013778325)	100	0	27	4369990	66.1975
Sphingomonas citri RRHST34T (GCA_019429485)	99.2321	1.33268	12	3506167	67.5487
Sphingomonas citricola RHCKR47T (GCA_019429535)	99.4395	0.365675	30	4687655	69.6281
Sphingomonas colocasiae JCM 31229T (GCA_019880585)	100	1.31884	23	6569909	65.6034
Sphingomonas corticis 36D10-4-7T (GCA_012035195)	99.5904	0.792296	54	4156006	70.2797
Sphingomonas crocodyli CCP-7T (GCA_004005865)	100	0	8	4883533	64.537
Sphingomonas crusticola MIMD3T (GCA_003391115)	99.095	0.301659	2	3367145	64.7135
Sphingomonas daechungensis JCM 17887T (GCA_039543105)	90.5826	2.0649	2	3007882	63.0056
Sphingomonas deserti GL-C-18T (GCA_003012735)	100	0.434783	32	6091880	65.992
Sphingomonas desiccabilis CP1DT (GCA_004135605)	99.485	0.196381	5	3607011	68.2361
Sphingomonas dokdonensis DSM 21029T (GCA_002197685)	99.1638	0.731351	16	3452664	66.4615
Sphingomonas echinoides ATCC 14820T (GCA_000241465)	98.9761	1.21079	64	4264936	64.6758
Sphingomonas edaphi DAC4T (GCA_003583725)	99.41	0	5	2373152	62.1561
Sphingomonas endophytica DSM 101535T (GCA_014199415)	99.5904	0.341297	22	3605788	68.1977
Sphingomonas faeni MA-olkiT (GCA_003053745)	99.6587	0.564765	34	4383558	64.8126
Sphingomonas fennica K101T (GCA_003034225)	99.5475	0	89	4494276	66.7822
Sphingomonas flavalba ZLT-5T (GCA_004796535)	99.6587	0.341297	35	3071096	68.0261
Sphingomonas floccifaciens CGMCC 1.15797T (GCM10020312)	99.5249	2.01934	48	4348504	66.2905
Sphingomonas folii RHCKR7T (GCA_019429525)	99.6386	0.564765	22	4390202	70.978
Sphingomonas formosensis CC-Nfb-2T (GCA_009755815)	98.6425	0.226244	39	6899075	65.1568
Sphingomonas gei ZFGT-11T (GCA_004792685)	99.5005	1.13495	25	4661578	65.9089
Sphingomonas gellani S6-262T (GCA_900110035)	99.5734	2.08191	20	3847972	66.9529
Sphingomonas gilva ZDH117T (GCA_003515075)	99.2321	0.263286	19	3541169	67.6444
Sphingomonas ginkgonis HMF7854T (GCA_003970925)	99.4469	0.737463	2	3213590	68.4271
Sphingomonas ginsengisoli KCTC 12630T (GCA_003332855)	99.5575	0.442478	7	3036388	67.156
Sphingomonas ginsenosidimutans KACC 14949T (GCA_002374835)	99.6587	0.682594	57	3900947	68.7724
Sphingomonas glacialis CGMCC 1.8957T (GCA_014653575)	99.5704	1.3083	64	4470563	65.6589
Sphingomonas guangdongensis CGMCC 1.12672T (GCA_900199185)	99.3174	0.0243784	6	3544824	68.6238
Sphingomonas haloaromaticamans CCUG 53463T (GCM10027149)	99.5475	0.904977	59	4923741	66.5626
Sphingomonas hankookensis KCTC 22579T (GCA_022664465)	99.5222	0.625711	38	3977879	66.7874
Sphingomonas hengshuiensis WHSC-8T (GCA_000935025)	99.5449	0.414432	2	5228389	66.669
Sphingomonas hominis HHU CXWT (GCA_013328205)	99.1638	0.755729	37	3558103	67.116
Sphingomonas hylomeconis CCTCC AB 2013304T (GCA_025370105)	99.5449	0.43881	17	3948644	66.5493
Sphingomonas insulae KCTC 12872T (GCA_010450875)	98.5495	0.706972	5	3742477	66.6788
Sphingomonas japonica KC7T (GCA_006346325)	99.5904	0.341297	6	2861919	66.2911
Sphingomonas jaspsi DSM 18422T (GCA_000585415)	99.5575	0.530973	2	2548011	64.6992
Sphingomonas jatrophae S5-249T (GCA_900113315)	99.8869	0.452489	6	4060565	68.4663
Sphingomonas jeddahensis G39T (GCA_001981525)	98.5495	0.43881	28	3117315	65.8377
Sphingomonas jejuensis DSM 27651T (GCA_011927695)	98.2621	0.706972	10	2962167	68.5537
Sphingomonas jinjuensis YC6723T (GCA_014197105)	99.6587	0.682594	35	3855215	67.6563
Sphingomonas kaistensis DSM 16846T (GCA_011927725)	99.9115	0.884956	1	2846238	66.9722
Sphingomonas koreensis KCTC 2882T (GCA_003953035)	99.2491	1.77532	60	4347898	66.1562
Sphingomonas kyeonggiensis DSM 101806T (GCA_014196745)	99.6587	2.21843	9	5517776	66.7615
Sphingomonas kyungheensis LMG 26582T (GCA_037120395)	99.3174	0.451	28	4055944	68.3127
Sphingomonas lacunae CSW-10T (GCA_012979535)	98.9761	0.511945	1	2977834	61.9807
Sphingomonas laterariae LNB2T (GCA_900188165)	99.8298	0.0411353	85	4419388	65.4629
Sphingomonas leidyi DSM 4733T (GCA_011761945)	99.7156	1.79181	11	4787838	67.561
Sphingomonas lenta 1PNM-20T (GCA_002288825)	99.3515	1.11653	10	3757425	69.8283
Sphingomonas lutea KCTC 23642T (GCA_014396785)	98.1416	0	1	2417654	65.3265
Sphingomonas mali NBRC 15500T (GCA_001598415)	99.5734	3.68926	108	5228377	64.8588
Sphingomonas melonis DAPP-PG 224T (GCA_000379045)	99.6587	0	6	4096205	66.9997
Sphingomonas mesophila SYSUP0001T (GCA_003499275)	98.3628	0	13	2291351	67.5402
Sphingomonas metalli CGMCC 1.15330T (GCA_014641735)	99.1695	0.682594	21	3855782	68.6025
Sphingomonas montana W16RDT (GCA_001956315)	99.5475	0.15083	35	3722743	67.042
Sphingomonas montanisoli ZX9611T (GCA_008274695)	99.5475	0.452489	15	4115974	64.8304
Sphingomonas morindae NBD5T (GCA_023822065)	100	1.37255	4	4239716	69.4682
Sphingomonas mucosissima DSM 17494T (GCA_002197665)	99.2321	0.755729	16	3584790	65.0781
Sphingomonas naasensis DSM 100060T (GCA_011762145)	99.6587	1.6496	7	4335120	67.6912
Sphingomonas naphthae KACC 18716T (GCA_028607085)	100	0.754148	5	4310851	67.2991
Sphingomonas olei JCM 31674T (GCA_004801655)	99.2321	0.731351	42	3496927	66.6659
Sphingomonas oleivorans FW-11T (GCA_003050615)	100	0	19	3873878	65.3534
Sphingomonas oligoaromativorans DSM 102246T (GCA_011762195)	99.5652	0.434783	27	3867692	67.4342
Sphingomonas oligophenolica JCM 12082T (GCA_039522915)	99.6587	0.767918	47	3089412	65.8363
Sphingomonas paeninsulae YZ-8T (GCA_003660165)	95.5507	0	3	3994557	58.8618
Sphingomonas palmae JS21-1T (GCA_900109565)	99.2321	0.755729	12	3272897	67.3266
Sphingomonas panacis DCY99T (GCA_001717955)	99.3174	3.18137	2	5322941	65.4867
Sphingomonas panacisoli HKS19T (GCA_007859635)	98.8989	0.625711	1	3403025	65.1459
Sphingomonas panni DSM 15761T (GCA_037154175)	99.5704	0.273038	23	4187984	66.4105
Sphingomonas parapaucimobilis NBRC 15100T (GCA_000787715)	99.5904	0.865431	127	3994522	66.3826
Sphingomonas paucimobilis NCTC 11030T (GCA_900457515)	96.2882	1.13359	3	4340887	65.6741
Sphingomonas phyllosphaerae FA2T (GCA_000427645)	99.6587	0.341297	4	3920299	67.1988
Sphingomonas piscis HDW15BT (GCA_011300455)	97.5885	0	1	2718035	63.2753
Sphingomonas pituitosa NBRC 102491T (GCA_001598435)	99.6587	1.73086	75	4743156	67.0799
Sphingomonas pokkalii L3B27T (GCA_003096275)	99.4767	1.64554	34	4223965	66.2053
Sphingomonas populi 3-7T (GCA_004208535)	99.6587	4.575	190	5204106	65.066
Sphingomonas prati W18RDT (GCA_009755805)	100	0	30	3831002	66.9032
Sphingomonas profundi LMO-1T (GCA_009739515)	99.5475	0.452489	1	4538634	69.2015
Sphingomonas pruni NBRC 15498T (GCA_001598455)	99.2321	2.29563	168	4482342	64.8145
Sphingomonas pseudosanguinis DSM 19512T (GCA_017052355)	99.6587	0.341297	113	3902944	66.6579
Sphingomonas psychrolutea CGMCC 1.10106T (GCA_014636175)	98.9073	0.455063	58	3749451	64.1588
Sphingomonas psychrotolerans Cra20T (GCA_002796605)	99.6587	2.04778	2	5038478	65.5933
Sphingomonas qilianensis CGMCC 1.15349T (GCA_039614825)	99.468	0.0243784	13	3418280	64.7329
Sphingomonas quercus XMGL2T (GCA_018863195)	99.3213	0	15	3637754	67.8537
Sphingomonas radiodurans S9-5T (GCA_020866845)	99.5249	0.69072	1	3678193	65.746
Sphingomonas rhizophila KACC 19189T (GCA_014396585)	96.2021	0.0884956	1	2557483	65.1837
Sphingomonas rubra CGMCC 1.9113T (GCA_900115745)	99.5021	0.341297	25	3200202	68.782
Sphingomonas sabuli sand1-3T (GCA_014352855)	98.8938	0	1	2513891	65.8539
Sphingomonas sanguinis NBRC 13937T (GCA_001591005)	99.5904	1.10922	134	4053092	66.1099
Sphingomonas sanxanigenens NX02T (GCA_000512205)	100	0.434783	2	6580298	66.6585
Sphingomonas segetis YJ09T (GCA_009720245)	97.3894	0.0294985	329	2861518	65.9124
Sphingomonas sinipercae HDW15CT (GCA_011302055)	98.2301	0	1	2071006	65.4541
Sphingomonas solaris R4DWNT (GCA_007785815)	99.095	0.603318	229	4444219	67.9076
Sphingomonas soli NBRC 100801T (GCA_001591025)	99.6587	0.284414	35	3514102	65.1323
Sphingomonas spermidinifaciens 9NM-10T (GCA_002351485)	99.6587	0.682594	5	3635691	67.9655
Sphingomonas suaedae XS-10T (GCA_007833215)	99.3743	0.796359	1	4154291	65.5341
Sphingomonas trueperi DSM 7225T (GCA_011927635)	99.6587	1.59597	44	4619810	67.4331
Sphingomonas turrisvirgatae MCT13T (GCA_001721295)	99.5449	2.48578	86	4099485	65.3238
Sphingomonas vulcanisoli CECT 8804T (GCA_011761305)	98.6425	1.35747	17	3267440	64.5982
Sphingomonas xinjiangensis DSM 26736T (GCA_014199255)	99.5734	2.13446	64	4469200	64.1642
Sphingomonas yabuuchiae DSM 14562T (GCA_014199595)	99.5904	0.511945	60	4192364	65.9821
Sphingomonas yantingensis DSM 27244T (GCA_014199325)	99.5704	0.479441	11	3561452	68.1508
Sphingomonas yunnanensis YIM 3T (GCA_019898765)	99.5704	0.121892	22	4445204	69.9351
Sphingomonas zeae DSM 100049T (GCA_014197135)	99.6587	0.873319	46	4152142	65.731
Sphingomonas zeicaulis DSM 100587T (GCM10014836)	100	0.869565	28	6404736	66.0462
Sphingopyxis alaskensis RB2256T (GCA_000013985)	99.9799	0	2	3373713	65.4581
Sphingopyxis bauzanensis DSM 22271T (GCA_002205675)	99.2973	1.72924	32	4258005	63.2888
Sphingopyxis flava R11HT (GCA_900168005)	99.2973	2.20624	119	4155299	63.7508
Sphingopyxis fribergensis Kp5.2T (GCA_000803645)	99.6386	3.12856	2	5202172	63.7516
Sphingopyxis granuli NBRC 100800T (GCA_001591045)	99.6386	2.58004	181	4255049	66.3929
Sphingopyxis indica DS15T (GCA_900188185)	99.9799	0.682594	37	4149802	65.711
Sphingopyxis italica DSM 25229T (GCA_011926545)	99.6386	1.6041	13	4042700	65.403
Sphingopyxis jiangsuensis XHP0097T (GCA_019793235)	99.6386	1.09703	6	3073368	64.7101
Sphingopyxis lindanitolerans WS5A3pT (GCA_002993885)	99.6386	1.36519	5	4373091	65.1423
Sphingopyxis macrogoltabida 203T (GCA_001314325)	99.6386	2.04778	3	5748623	64.8585
Sphingopyxis panaciterrae DSM 27164T (GCA_011762125)	99.6386	0.901999	11	4842500	64.8445
Sphingopyxis panaciterrulae DSM 27163T (GCA_014199295)	99.6386	3.17731	35	4432917	66.4255
Sphingopyxis soli BL03T (GCA_018682675)	99.6386	0.0243784	116	3633474	65.789
Sphingopyxis solisilvae R366T (GCA_015475875)	99.9799	1.13766	53	3379576	64.7815
Sphingopyxis terrae NBRC 15098T (GCA_001598815)	99.6386	0.853242	62	4082958	64.9466
Sphingopyxis ummariensis DSM 24316T (GCA_002374275)	99.6386	0.853242	23	3570894	65.2245
Sphingopyxis witflariensis DSM 14551T (GCA_002205635)	99.9799	1.66968	39	4306761	63.3462
Sphingorhabdus arenilitoris CECT 8531T (GCM10014722)	98.5381	3.11294	2817	2612109	54.8334
Sphingorhabdus contaminans KCTC 32445T (GCA_007280415)	98.6348	0.877621	2	3291987	56.4238
Sphingorhabdus lacus IMCC 1753T (GCA_009768975)	98.9761	1.43832	1	3458743	56.6018
Sphingorhabdus lutea LPB0140T (GCA_001889025)	98.0546	0.853242	1	2533041	46.1197
Sphingorhabdus profundilacus IMCC 26285T (GCA_009769755)	98.8623	0.58508	3	2907197	55.5053
Sphingorhabdus pulchriflava GY_GT (GCA_003367235)	98.97	0.77	6	3219819	57.5
Sphingorhabdus rigui DSM 29050T (GCA_014196595)	97.7247	0.593207	17	2473636	56.1239
Sphingorhabdus soli D-2Q-5-6T (GCA_007995095)	99.4962	0	4	2587073	64.4653
Sphingorhabdus wooponensis 03SU3-PT (GCA_003933235)	96.8032	0.682594	8	2177915	54.5421
Sphingosinicella flava UDD2T (GCA_016025255)	99.1304	0	2	2421697	63.743
Sphingosinicella ginsenosidimutans BS11T (GCA_007995055)	99.1304	0.289855	2	3041979	67.9502
Sphingosinicella humi QZX222T (GCA_003129465)	99.1304	0.884058	4	3026360	65.8577
Sphingosinicella microcystinivorans DSM 19791T (GCA_003634215)	98.913	0	17	3963648	63.971
Sphingosinicella soli DSM 17328T (GCA_014199685)	98.6957	0.869565	95	3756600	64.7769
Sphingosinithalassobacter portus FM6T (GCA_003171655)	99.6587	1.05233	18	3850965	63.7006
Sphingosinithalassobacter tenebrarum zrk23T (GCA_011057975)	99.6587	0	1	3859475	64.69
Stakelama flava CBK3Z-3T (GCA_019351405)	99.5734	0.170648	36	3387040	62.6366
Stakelama pacifica DSM 25059T (GCA_004361835)	99.6587	0.953624	31	3981765	62.8846
Stakelama sediminis DSM 27203T (GCA_014199335)	99.6587	1.0117	24	3461669	61.8536
Thermaurantiacus tibetensis SYSU G02173T (GCA_015354055)	99.5652	0	18	2747682	71.7984
Tsuneonella aeria 100921-2T (GCA_009827495)	99.384	0.0601333	2	2750510	66.2619
Tsuneonella amylolytica NS1T (GCA_003626915)	99.5222	0.341297	1	2786235	67.0061
Tsuneonella deserti CGMCC 1.15959T (GCA_014644315)	98.9534	0.414432	1	2761687	65.2042
Tsuneonella dongtanensis KCTC 22672T (GCA_001698205)	99.5222	0.170648	1	3009495	65.7513
Tsuneonella ﬂava MS1-4T (GCA_002870965)	99.0785	1.03527	29	3275964	60.4566
Tsuneonella mangrovi C9-11T (GCA_002269345)	99.047	0.767918	1	2702851	63.49
Tsuneonella rigui KCTC 42620T (GCA_003958625)	99.3402	0	30	2863004	66.6501
Tsuneonella suprasediminis Ery12T (GCA_003605755)	99.4767	0.864619	26	3304416	60.8739
Tsuneonella troitsensis JCM 17037T (GCA_001441535)	99.5661	0.219405	9	2902267	64.6943
Zymomonas mobilis ATCC 10988T (GCA_000175255)	100	0.452489	7	2143461	46.0619

## Sheet: Table S2
Table S2. Annotations of OCs for the phylogenomic analysis assigned to COG and KEGG database.
Query	COG_category	Description	Preferred_name	Annotation	KO (threshold)	KEGG Definition
OG0001188	J	One of the primary rRNA binding proteins, it binds directly to 16S rRNA where it nucleates assembly of the body of the 30S subunit	rpsD	Ribosomal_S4,S4	K02986	small subunit ribosomal protein S4
OG0001189	J	Catalyzes the formation of 2'O-methylated cytidine (Cm32) or 2'O-methylated uridine (Um32) at position 32 in tRNA	trmJ	GIY-YIG,SpoU_methylase	K02533	tRNA/rRNA methyltransferase [EC:2.1.1.-]
OG0001190	K	Necessary for efficient RNA polymerase transcription elongation past template-encoded arresting sites. The arresting sites in DNA have the property of trapping a certain fraction of elongating RNA polymerases that pass through, resulting in locked ternary complexes. Cleavage of the nascent transcript by cleavage factors such as GreA or GreB allows the resumption of elongation from the new 3'termi…	greA	GreA_GreB,GreA_GreB_N	K03624	transcription elongation factor GreA
OG0001192	H	Belongs to the prokaryotic GSH synthase family	gshB	GSH-S_ATP,GSH-S_N	K01920	glutathione synthase [EC:6.3.2.3]
OG0001193	H	Catalyzes the radical-mediated insertion of two sulfur atoms into the C-6 and C-8 positions of the octanoyl moiety bound to the lipoyl domains of lipoate-dependent enzymes, thereby converting the octanoylated domains into lipoylated derivatives	lipA	LIAS_N,Radical_SAM	K03644	lipoyl synthase [EC:2.8.1.8]
OG0001194	S	metallo-beta-lactamase	-	Lactamase_B,Lactamase_B_2,RMMBL	K12574	ribonuclease J [EC:3.1.-.-]
OG0001198	J	Endoribonuclease that plays a central role in RNA processing and decay. Required for the maturation of 5S and 16S rRNAs and the majority of tRNAs. Also involved in the degradation of most mRNAs	rne	RNase_E_G,S1	K08300	ribonuclease E [EC:3.1.26.12]
OG0001200	J	Binds together with S18 to 16S ribosomal RNA	rpsF	Ribosomal_S6	K02990	small subunit ribosomal protein S6
OG0001201	J	Binds as a heterodimer with protein S6 to the central domain of the 16S rRNA, where it helps stabilize the platform of the 30S subunit	rpsR	Ribosomal_S18
OG0001202	J	Binds to the 23S rRNA	rplI	Ribosomal_L9_C,Ribosomal_L9_N	K02939	large subunit ribosomal protein L9
OG0001203	C	Component of the F(0) channel, it forms part of the peripheral stalk, linking F(1) to F(0)	atpF_2	ATP-synt_B	K02109	F-type H+-transporting ATPase subunit b
OG0001204	L	Belongs to the DEAD box helicase family	-		K11927	ATP-dependent RNA helicase RhlE [EC:3.6.4.13]
OG0001217	L	ATP-dependent DNA helicase RecG	recG	DEAD,Helicase_C,RecG_wedge	K03655	ATP-dependent DNA helicase RecG [EC:5.6.2.4]
OG0001218	G	Involved in the regulation of the intracellular balance of NAD and NADP, and is a key enzyme in the biosynthesis of NADP. Catalyzes specifically the phosphorylation on 2'-hydroxyl of the adenosine moiety of NAD to yield NADP	ppnK	NAD_kinase	K00858	NAD+ kinase [EC:2.7.1.23]
OG0001219	J	Aspartyl-tRNA synthetase with relaxed tRNA specificity since it is able to aspartylate not only its cognate tRNA(Asp) but also tRNA(Asn). Reaction proceeds in two steps L-aspartate is first activated by ATP to form Asp-AMP and then transferred to the acceptor end of tRNA(Asp Asn)	aspS	GAD,tRNA-synt_2,tRNA_anti-codon	K01876	aspartyl-tRNA synthetase [EC:6.1.1.12]
OG0001220	J	50S ribosomal protein L31	rpmE	Ribosomal_L31	K02909	large subunit ribosomal protein L31
OG0001221	J	Responsible for the release of ribosomes from messenger RNA at the termination of protein biosynthesis. May increase the efficiency of translation by recycling ribosomes from one round of translation to another	frr	RRF	K02838	ribosome recycling factor
OG0001246	K	Involved in transcription antitermination. Required for transcription of ribosomal RNA (rRNA) genes. Binds specifically to the boxA antiterminator sequence of the ribosomal RNA (rrn) operons	nusB	NusB	K03625	transcription antitermination protein NusB
OG0001247	F	Belongs to the SAICAR synthetase family	purC	SAICAR_synt	K01923	phosphoribosylaminoimidazole-succinocarboxamide synthase [EC:6.3.2.6]
OG0001249	J	Formation of pseudouridine at positions 38, 39 and 40 in the anticodon stem and loop of transfer RNAs	truA	PseudoU_synth_1	K06173	tRNA pseudouridine38-40 synthase [EC:5.4.99.12]
OG0001251	S	Putative bacterial sensory transduction regulator	-
OG0001252	D	Cell division protein that is involved in the assembly of the Z ring. May serve as a membrane anchor for the Z ring	ftsA	FtsA,SHS2_FTSA	K03590	cell division protein FtsA

## Sheet: Table S3
Table S3. ANI values among Sphingomonadales type strain genomes.
	Pedomonas mirosovicensis A1X5R2	Sphingoaurantiacus capsulatus KCTC 42644	Pacificimonas flava JLT2015	Sphingosinicella microcystinivorans DSM 19791	Sphingosinicella soli DSM 17328	Sandaracinobacteroides saxicola M6	Thermaurantiacus tibetensis SYSU G02173	Sandaracinobacteroides sayramensis RS1-74	Sandaracinobacteroides hominis SZY PN-1	Polymorphobacter arshaanensis DJ1R-1	Polymorphobacter megasporae PAMC 29362	Chioneia frigida R-67880	Chioneia hiemis R-36677	Chioneia algoris R-39594	Chioneia brumae R-39161	Glacieibacterium frigidum LB1R16	Polymorphobacter fuscus D40P	Polymorphobacter glacialis CGMCC 1.15519	Polymorphobacter multimanifer JCM 18140	Sandarakinorhabdus cyanobacteriorum TH057	Sandarakinorhabdus rubra MO-4	Sandarakinorhabdus oryzae NM-18	Sandarakinorhabdus limnophila DSM 17366	Sphingosinicella ginsenosidimutans BS-11	Allosphingosinicella indica Dd16	Sphingosinicella humi QZX222	Sphingomonas deserti GL-C-18	Allosphingosinicella vermicomposti KCTC 22446	Sphingosinicella flava KCTC-82357	Sphingomicrobium lutaoense DSM 24194	Sphingomicrobium flavum JCM18555	Sphingomicrobium marinum JCM18554	Sphingomicrobium arenosum NBRC113094	Sphingomicrobium aestuariivivum KCTC 42286	Sphingomicrobium astaxanthinifaciens JCM 18551	Sphingomonas mesophila SYSUP0001	Sphingomonas rhizophila KACC 19189	Sphingomonas edaphi DAC4	Sphingomonas jaspsi DSM 18422	Sphingomonas ginkgonis HMF7854	Sphingomonas arenae SYSUD00720	Sphingomonas ginsengisoli KCTC 12630	Sphingomonas kaistensis DSM 16846	Sphingomonas astaxanthinifaciens DSM 22298	Sphingomonas piscis HDW15B	Sphingomonas daechungensis KACC 18115	Sphingomonas sinipercae HDW15C	Sphingomonas sabuli sand1-3	Sphingomonas lutea KCTC 23642
Pedomonas mirosovicensis A1X5R2		0.57	0.54	0.56	0.56	0.55	0.55	0.55	0.54	0.56	0.54	0.55	0.55	0.55	0.56	0.55	0.55	0.55	0.53	0.54	0.55	0.54	0.55	0.53	0.54	0.54	0.54	0.54	0.55	0.53	0.52	0.52	0.52	0.52	0.52	0.53	0.53	0.53	0.52	0.52	0.53	0.53	0.52	0.53	0.53	0.53	0.53	0.53	0.53
Sphingoaurantiacus capsulatus KCTC 42644	0.57		0.58	0.6	0.6	0.58	0.58	0.58	0.58	0.61	0.59	0.6	0.6	0.61	0.61	0.61	0.6	0.6	0.58	0.58	0.59	0.58	0.6	0.57	0.58	0.59	0.56	0.59	0.59	0.55	0.54	0.54	0.54	0.54	0.55	0.56	0.56	0.56	0.55	0.55	0.56	0.55	0.55	0.56	0.55	0.55	0.56	0.56	0.56
Pacificimonas flava JLT2015	0.54	0.58		0.6	0.6	0.55	0.55	0.55	0.55	0.57	0.55	0.55	0.56	0.56	0.56	0.56	0.56	0.56	0.54	0.55	0.56	0.55	0.56	0.55	0.56	0.56	0.54	0.56	0.56	0.54	0.53	0.54	0.54	0.54	0.54	0.55	0.54	0.54	0.53	0.54	0.54	0.54	0.54	0.54	0.53	0.53	0.54	0.54	0.54
Sphingosinicella microcystinivorans DSM 19791	0.56	0.6	0.6		0.86	0.57	0.57	0.57	0.57	0.59	0.56	0.57	0.58	0.58	0.59	0.58	0.58	0.57	0.56	0.57	0.58	0.57	0.58	0.56	0.58	0.58	0.55	0.58	0.58	0.55	0.54	0.54	0.54	0.54	0.55	0.56	0.56	0.56	0.55	0.54	0.55	0.54	0.54	0.55	0.54	0.55	0.56	0.55	0.56
Sphingosinicella soli DSM 17328	0.56	0.6	0.6	0.86		0.57	0.57	0.57	0.57	0.59	0.57	0.58	0.58	0.58	0.59	0.58	0.58	0.58	0.56	0.56	0.58	0.57	0.57	0.56	0.58	0.57	0.55	0.58	0.57	0.55	0.54	0.54	0.54	0.54	0.55	0.56	0.56	0.56	0.56	0.54	0.56	0.55	0.55	0.56	0.55	0.55	0.56	0.55	0.56
Sandaracinobacteroides saxicola M6	0.55	0.58	0.55	0.57	0.57		0.63	0.62	0.62	0.6	0.58	0.59	0.59	0.59	0.6	0.6	0.59	0.59	0.58	0.59	0.6	0.59	0.59	0.54	0.55	0.55	0.53	0.56	0.56	0.54	0.53	0.53	0.53	0.53	0.54	0.55	0.54	0.55	0.54	0.53	0.54	0.54	0.54	0.55	0.54	0.53	0.55	0.54	0.54
Thermaurantiacus tibetensis SYSU G02173	0.55	0.58	0.55	0.57	0.57	0.63		0.63	0.64	0.59	0.57	0.58	0.59	0.59	0.59	0.59	0.59	0.58	0.58	0.58	0.6	0.58	0.58	0.55	0.55	0.55	0.54	0.55	0.55	0.54	0.53	0.53	0.53	0.53	0.54	0.55	0.54	0.55	0.54	0.54	0.54	0.54	0.54	0.55	0.54	0.54	0.55	0.54	0.54
Sandaracinobacteroides sayramensis RS1-74	0.55	0.58	0.55	0.57	0.57	0.62	0.63		0.72	0.58	0.55	0.57	0.56	0.57	0.57	0.57	0.57	0.57	0.56	0.56	0.57	0.56	0.57	0.54	0.55	0.55	0.53	0.55	0.55	0.54	0.53	0.52	0.52	0.53	0.53	0.54	0.54	0.54	0.53	0.53	0.54	0.54	0.53	0.54	0.53	0.53	0.54	0.53	0.54
Sandaracinobacteroides hominis SZY PN-1	0.54	0.58	0.55	0.57	0.57	0.62	0.64	0.72		0.58	0.56	0.57	0.57	0.58	0.58	0.58	0.58	0.58	0.57	0.57	0.58	0.58	0.58	0.54	0.55	0.54	0.54	0.55	0.55	0.54	0.52	0.52	0.52	0.53	0.53	0.54	0.54	0.54	0.54	0.53	0.54	0.54	0.53	0.54	0.53	0.53	0.54	0.54	0.54
Polymorphobacter arshaanensis DJ1R-1	0.56	0.61	0.57	0.59	0.59	0.6	0.59	0.58	0.58		0.64	0.64	0.64	0.65	0.65	0.65	0.64	0.63	0.61	0.61	0.62	0.61	0.62	0.56	0.56	0.56	0.54	0.57	0.57	0.54	0.53	0.53	0.53	0.53	0.54	0.55	0.55	0.55	0.55	0.55	0.55	0.55	0.54	0.55	0.54	0.54	0.56	0.55	0.55
Polymorphobacter megasporae PAMC 29362	0.54	0.59	0.55	0.56	0.57	0.58	0.57	0.55	0.56	0.64		0.64	0.65	0.65	0.65	0.65	0.63	0.62	0.6	0.59	0.6	0.6	0.6	0.55	0.55	0.55	0.54	0.55	0.55	0.53	0.52	0.52	0.52	0.52	0.53	0.54	0.54	0.54	0.54	0.54	0.53	0.54	0.54	0.54	0.54	0.53	0.54	0.53	0.54
Chioneia frigida R-67880	0.55	0.6	0.55	0.57	0.58	0.59	0.58	0.57	0.57	0.64	0.64		0.72	0.72	0.73	0.72	0.63	0.63	0.61	0.6	0.61	0.6	0.62	0.55	0.56	0.55	0.54	0.56	0.56	0.54	0.53	0.53	0.53	0.53	0.54	0.54	0.55	0.55	0.55	0.54	0.54	0.54	0.54	0.55	0.54	0.54	0.55	0.54	0.54
Chioneia hiemis R-36677	0.55	0.6	0.56	0.58	0.58	0.59	0.59	0.56	0.57	0.64	0.65	0.72		0.88	0.88	0.88	0.64	0.64	0.62	0.6	0.62	0.61	0.62	0.55	0.56	0.56	0.55	0.56	0.56	0.54	0.53	0.53	0.53	0.53	0.54	0.55	0.55	0.55	0.54	0.54	0.54	0.54	0.55	0.55	0.54	0.54	0.55	0.54	0.55
Chioneia algoris R-39594	0.55	0.61	0.56	0.58	0.58	0.59	0.59	0.57	0.58	0.65	0.65	0.72	0.88		0.87	0.88	0.65	0.64	0.63	0.61	0.62	0.61	0.62	0.56	0.57	0.56	0.55	0.57	0.57	0.54	0.54	0.54	0.53	0.53	0.54	0.55	0.55	0.55	0.55	0.55	0.55	0.54	0.55	0.55	0.55	0.54	0.55	0.55	0.55
Chioneia brumae R-39161	0.56	0.61	0.56	0.59	0.59	0.6	0.59	0.57	0.58	0.65	0.65	0.73	0.88	0.87		0.9	0.65	0.64	0.62	0.61	0.63	0.62	0.62	0.56	0.57	0.57	0.55	0.57	0.57	0.55	0.54	0.54	0.54	0.54	0.54	0.55	0.55	0.55	0.55	0.55	0.55	0.55	0.55	0.56	0.55	0.54	0.56	0.55	0.55
Glacieibacterium frigidum LB1R16	0.55	0.61	0.56	0.58	0.58	0.6	0.59	0.57	0.58	0.65	0.65	0.72	0.88	0.88	0.9		0.65	0.64	0.62	0.61	0.62	0.61	0.62	0.56	0.57	0.56	0.55	0.56	0.57	0.54	0.53	0.53	0.53	0.53	0.54	0.55	0.55	0.55	0.54	0.55	0.55	0.55	0.55	0.56	0.55	0.54	0.56	0.54	0.55
Polymorphobacter fuscus D40P	0.55	0.6	0.56	0.58	0.58	0.59	0.59	0.57	0.58	0.64	0.63	0.63	0.64	0.65	0.65	0.65		0.74	0.68	0.66	0.68	0.67	0.68	0.55	0.56	0.56	0.55	0.56	0.56	0.54	0.53	0.53	0.53	0.53	0.53	0.55	0.54	0.55	0.54	0.54	0.54	0.54	0.54	0.55	0.54	0.54	0.55	0.54	0.54
Polymorphobacter glacialis CGMCC 1.15519	0.55	0.6	0.56	0.57	0.58	0.59	0.58	0.57	0.58	0.63	0.62	0.63	0.64	0.64	0.64	0.64	0.74		0.68	0.65	0.66	0.66	0.67	0.55	0.56	0.56	0.55	0.56	0.56	0.54	0.53	0.53	0.53	0.53	0.53	0.54	0.55	0.55	0.54	0.54	0.54	0.54	0.54	0.54	0.54	0.54	0.55	0.54	0.54
Polymorphobacter multimanifer JCM 18140	0.53	0.58	0.54	0.56	0.56	0.58	0.58	0.56	0.57	0.61	0.6	0.61	0.62	0.63	0.62	0.62	0.68	0.68		0.65	0.66	0.65	0.66	0.54	0.55	0.54	0.53	0.55	0.55	0.53	0.52	0.52	0.52	0.52	0.53	0.54	0.54	0.54	0.53	0.53	0.54	0.53	0.53	0.54	0.53	0.52	0.54	0.53	0.54
Sandarakinorhabdus cyanobacteriorum TH057	0.54	0.58	0.55	0.57	0.56	0.59	0.58	0.56	0.57	0.61	0.59	0.6	0.6	0.61	0.61	0.61	0.66	0.65	0.65		0.8	0.81	0.81	0.54	0.55	0.54	0.53	0.55	0.56	0.53	0.53	0.52	0.52	0.53	0.53	0.54	0.54	0.54	0.54	0.53	0.54	0.54	0.53	0.54	0.53	0.53	0.54	0.54	0.54
Sandarakinorhabdus rubra MO-4	0.55	0.59	0.56	0.58	0.58	0.6	0.6	0.57	0.58	0.62	0.6	0.61	0.62	0.62	0.63	0.62	0.68	0.66	0.66	0.8		0.81	0.81	0.55	0.56	0.56	0.54	0.56	0.56	0.54	0.53	0.53	0.53	0.53	0.54	0.55	0.54	0.55	0.55	0.54	0.55	0.54	0.54	0.55	0.54	0.54	0.55	0.54	0.55
Sandarakinorhabdus oryzae NM-18	0.54	0.58	0.55	0.57	0.57	0.59	0.58	0.56	0.58	0.61	0.6	0.6	0.61	0.61	0.62	0.61	0.67	0.66	0.65	0.81	0.81		0.86	0.55	0.55	0.55	0.53	0.56	0.56	0.54	0.53	0.53	0.52	0.53	0.53	0.54	0.54	0.55	0.54	0.54	0.54	0.54	0.54	0.55	0.54	0.53	0.55	0.54	0.54
Sandarakinorhabdus limnophila DSM 17366	0.55	0.6	0.56	0.58	0.57	0.59	0.58	0.57	0.58	0.62	0.6	0.62	0.62	0.62	0.62	0.62	0.68	0.67	0.66	0.81	0.81	0.86		0.55	0.55	0.55	0.54	0.56	0.56	0.54	0.53	0.53	0.53	0.53	0.54	0.54	0.54	0.55	0.55	0.54	0.54	0.54	0.54	0.55	0.54	0.53	0.55	0.54	0.54
Sphingosinicella ginsenosidimutans BS-11	0.53	0.57	0.55	0.56	0.56	0.54	0.55	0.54	0.54	0.56	0.55	0.55	0.55	0.56	0.56	0.56	0.55	0.55	0.54	0.54	0.55	0.55	0.55		0.66	0.67	0.64	0.66	0.66	0.59	0.58	0.58	0.58	0.58	0.59	0.61	0.61	0.61	0.6	0.61	0.61	0.6	0.6	0.61	0.6	0.61	0.61	0.6	0.61
Allosphingosinicella indica Dd16	0.54	0.58	0.56	0.58	0.58	0.55	0.55	0.55	0.55	0.56	0.55	0.56	0.56	0.57	0.57	0.57	0.56	0.56	0.55	0.55	0.56	0.55	0.55	0.66		0.7	0.66	0.68	0.69	0.6	0.59	0.59	0.58	0.59	0.59	0.61	0.61	0.62	0.61	0.61	0.61	0.6	0.6	0.61	0.61	0.61	0.62	0.61	0.61
Sphingosinicella humi QZX222	0.54	0.59	0.56	0.58	0.57	0.55	0.55	0.55	0.54	0.56	0.55	0.55	0.56	0.56	0.57	0.56	0.56	0.56	0.54	0.54	0.56	0.55	0.55	0.67	0.7		0.68	0.7	0.7	0.6	0.59	0.59	0.58	0.59	0.59	0.61	0.61	0.62	0.61	0.61	0.61	0.6	0.6	0.6	0.61	0.61	0.62	0.61	0.61
Sphingomonas deserti GL-C-18	0.54	0.56	0.54	0.55	0.55	0.53	0.54	0.53	0.54	0.54	0.54	0.54	0.55	0.55	0.55	0.55	0.55	0.55	0.53	0.53	0.54	0.53	0.54	0.64	0.66	0.68		0.67	0.67	0.59	0.57	0.57	0.56	0.57	0.57	0.59	0.6	0.6	0.59	0.6	0.6	0.59	0.59	0.6	0.61	0.59	0.6	0.59	0.6
Allosphingosinicella vermicomposti KCTC 22446	0.54	0.59	0.56	0.58	0.58	0.56	0.55	0.55	0.55	0.57	0.55	0.56	0.56	0.57	0.57	0.56	0.56	0.56	0.55	0.55	0.56	0.56	0.56	0.66	0.68	0.7	0.67		0.81	0.6	0.59	0.59	0.58	0.59	0.59	0.61	0.61	0.62	0.61	0.61	0.62	0.6	0.61	0.61	0.61	0.61	0.62	0.61	0.62
Sphingosinicella flava KCTC-82357	0.55	0.59	0.56	0.58	0.57	0.56	0.55	0.55	0.55	0.57	0.55	0.56	0.56	0.57	0.57	0.57	0.56	0.56	0.55	0.56	0.56	0.56	0.56	0.66	0.69	0.7	0.67	0.81		0.61	0.6	0.59	0.59	0.59	0.6	0.62	0.62	0.62	0.62	0.61	0.62	0.61	0.61	0.62	0.62	0.62	0.62	0.62	0.62
Sphingomicrobium lutaoense DSM 24194	0.53	0.55	0.54	0.55	0.55	0.54	0.54	0.54	0.54	0.54	0.53	0.54	0.54	0.54	0.55	0.54	0.54	0.54	0.53	0.53	0.54	0.54	0.54	0.59	0.6	0.6	0.59	0.6	0.61		0.76	0.72	0.68	0.68	0.69	0.65	0.66	0.66	0.66	0.63	0.64	0.63	0.63	0.63	0.63	0.63	0.64	0.63	0.63
Sphingomicrobium flavum JCM18555	0.52	0.54	0.53	0.54	0.54	0.53	0.53	0.53	0.52	0.53	0.52	0.53	0.53	0.54	0.54	0.53	0.53	0.53	0.52	0.53	0.53	0.53	0.53	0.58	0.59	0.59	0.57	0.59	0.6	0.76		0.72	0.67	0.68	0.68	0.64	0.64	0.65	0.65	0.61	0.63	0.61	0.61	0.62	0.62	0.62	0.63	0.62	0.63
Sphingomicrobium marinum JCM18554	0.52	0.54	0.54	0.54	0.54	0.53	0.53	0.52	0.52	0.53	0.52	0.53	0.53	0.54	0.54	0.53	0.53	0.53	0.52	0.52	0.53	0.53	0.53	0.58	0.59	0.59	0.57	0.59	0.59	0.72	0.72		0.67	0.68	0.68	0.63	0.64	0.64	0.64	0.61	0.62	0.61	0.61	0.62	0.61	0.62	0.62	0.62	0.62
Sphingomicrobium arenosum NBRC113094	0.52	0.54	0.54	0.54	0.54	0.53	0.53	0.52	0.52	0.53	0.52	0.53	0.53	0.53	0.54	0.53	0.53	0.53	0.52	0.52	0.53	0.52	0.53	0.58	0.58	0.58	0.56	0.58	0.59	0.68	0.67	0.67		0.84	0.82	0.63	0.62	0.63	0.63	0.6	0.61	0.6	0.6	0.61	0.6	0.61	0.61	0.61	0.61
Sphingomicrobium aestuariivivum KCTC 42286	0.52	0.54	0.54	0.54	0.54	0.53	0.53	0.53	0.53	0.53	0.52	0.53	0.53	0.53	0.54	0.53	0.53	0.53	0.52	0.53	0.53	0.53	0.53	0.58	0.59	0.59	0.57	0.59	0.59	0.68	0.68	0.68	0.84		0.84	0.63	0.63	0.64	0.63	0.61	0.62	0.61	0.61	0.61	0.61	0.61	0.62	0.61	0.62
Sphingomicrobium astaxanthinifaciens JCM 18551	0.52	0.55	0.54	0.55	0.55	0.54	0.54	0.53	0.53	0.54	0.53	0.54	0.54	0.54	0.54	0.54	0.53	0.53	0.53	0.53	0.54	0.53	0.54	0.59	0.59	0.59	0.57	0.59	0.6	0.69	0.68	0.68	0.82	0.84		0.64	0.63	0.64	0.64	0.61	0.62	0.61	0.61	0.62	0.61	0.62	0.62	0.62	0.62
Sphingomonas mesophila SYSUP0001	0.53	0.56	0.55	0.56	0.56	0.55	0.55	0.54	0.54	0.55	0.54	0.54	0.55	0.55	0.55	0.55	0.55	0.54	0.54	0.54	0.55	0.54	0.54	0.61	0.61	0.61	0.59	0.61	0.62	0.65	0.64	0.63	0.63	0.63	0.64		0.69	0.7	0.68	0.66	0.67	0.66	0.65	0.66	0.66	0.66	0.67	0.67	0.67
Sphingomonas rhizophila KACC 19189	0.53	0.56	0.54	0.56	0.56	0.54	0.54	0.54	0.54	0.55	0.54	0.55	0.55	0.55	0.55	0.55	0.54	0.55	0.54	0.54	0.54	0.54	0.54	0.61	0.61	0.61	0.6	0.61	0.62	0.66	0.64	0.64	0.62	0.63	0.63	0.69		0.72	0.71	0.66	0.67	0.66	0.65	0.66	0.65	0.66	0.67	0.66	0.67
Sphingomonas edaphi DAC4	0.53	0.56	0.54	0.56	0.56	0.55	0.55	0.54	0.54	0.55	0.54	0.55	0.55	0.55	0.55	0.55	0.55	0.55	0.54	0.54	0.55	0.55	0.55	0.61	0.62	0.62	0.6	0.62	0.62	0.66	0.65	0.64	0.63	0.64	0.64	0.7	0.72		0.74	0.67	0.68	0.66	0.66	0.66	0.67	0.67	0.68	0.67	0.68
Sphingomonas jaspsi DSM 18422	0.52	0.55	0.53	0.55	0.56	0.54	0.54	0.53	0.54	0.55	0.54	0.55	0.54	0.55	0.55	0.54	0.54	0.54	0.53	0.54	0.55	0.54	0.55	0.6	0.61	0.61	0.59	0.61	0.62	0.66	0.65	0.64	0.63	0.63	0.64	0.68	0.71	0.74		0.66	0.66	0.65	0.65	0.66	0.66	0.66	0.67	0.65	0.66
Sphingomonas ginkgonis HMF7854	0.52	0.55	0.54	0.54	0.54	0.53	0.54	0.53	0.53	0.55	0.54	0.54	0.54	0.55	0.55	0.55	0.54	0.54	0.53	0.53	0.54	0.54	0.54	0.61	0.61	0.61	0.6	0.61	0.61	0.63	0.61	0.61	0.6	0.61	0.61	0.66	0.66	0.67	0.66		0.68	0.67	0.66	0.67	0.66	0.66	0.67	0.65	0.66
Sphingomonas arenae SYSUD00720	0.53	0.56	0.54	0.55	0.56	0.54	0.54	0.54	0.54	0.55	0.53	0.54	0.54	0.55	0.55	0.55	0.54	0.54	0.54	0.54	0.55	0.54	0.54	0.61	0.61	0.61	0.6	0.62	0.62	0.64	0.63	0.62	0.61	0.62	0.62	0.67	0.67	0.68	0.66	0.68		0.71	0.7	0.71	0.67	0.67	0.67	0.66	0.67
Sphingomonas ginsengisoli KCTC 12630	0.53	0.55	0.54	0.54	0.55	0.54	0.54	0.54	0.54	0.55	0.54	0.54	0.54	0.54	0.55	0.55	0.54	0.54	0.53	0.54	0.54	0.54	0.54	0.6	0.6	0.6	0.59	0.6	0.61	0.63	0.61	0.61	0.6	0.61	0.61	0.66	0.66	0.66	0.65	0.67	0.71		0.69	0.71	0.65	0.65	0.66	0.64	0.65
Sphingomonas kaistensis DSM 16846	0.52	0.55	0.54	0.54	0.55	0.54	0.54	0.53	0.53	0.54	0.54	0.54	0.55	0.55	0.55	0.55	0.54	0.54	0.53	0.53	0.54	0.54	0.54	0.6	0.6	0.6	0.59	0.61	0.61	0.63	0.61	0.61	0.6	0.61	0.61	0.65	0.65	0.66	0.65	0.66	0.7	0.69		0.78	0.65	0.64	0.65	0.64	0.65
Sphingomonas astaxanthinifaciens DSM 22298	0.53	0.56	0.54	0.55	0.56	0.55	0.55	0.54	0.54	0.55	0.54	0.55	0.55	0.55	0.56	0.56	0.55	0.54	0.54	0.54	0.55	0.55	0.55	0.61	0.61	0.6	0.6	0.61	0.62	0.63	0.62	0.62	0.61	0.61	0.62	0.66	0.66	0.66	0.66	0.67	0.71	0.71	0.78		0.66	0.65	0.66	0.65	0.66
Sphingomonas piscis HDW15B	0.53	0.55	0.53	0.54	0.55	0.54	0.54	0.53	0.53	0.54	0.54	0.54	0.54	0.55	0.55	0.55	0.54	0.54	0.53	0.53	0.54	0.54	0.54	0.6	0.61	0.61	0.61	0.61	0.62	0.63	0.62	0.61	0.6	0.61	0.61	0.66	0.65	0.67	0.66	0.66	0.67	0.65	0.65	0.66		0.67	0.69	0.66	0.68
Sphingomonas daechungensis KACC 18115	0.53	0.55	0.53	0.55	0.55	0.53	0.54	0.53	0.53	0.54	0.53	0.54	0.54	0.54	0.54	0.54	0.54	0.54	0.52	0.53	0.54	0.53	0.53	0.61	0.61	0.61	0.59	0.61	0.62	0.63	0.62	0.62	0.61	0.61	0.62	0.66	0.66	0.67	0.66	0.66	0.67	0.65	0.64	0.65	0.67		0.7	0.68	0.69
Sphingomonas sinipercae HDW15C	0.53	0.56	0.54	0.56	0.56	0.55	0.55	0.54	0.54	0.56	0.54	0.55	0.55	0.55	0.56	0.56	0.55	0.55	0.54	0.54	0.55	0.55	0.55	0.61	0.62	0.62	0.6	0.62	0.62	0.64	0.63	0.62	0.61	0.62	0.62	0.67	0.67	0.68	0.67	0.67	0.67	0.66	0.65	0.66	0.69	0.7		0.71	0.7
Sphingomonas sabuli sand1-3	0.53	0.56	0.54	0.55	0.55	0.54	0.54	0.53	0.54	0.55	0.53	0.54	0.54	0.55	0.55	0.54	0.54	0.54	0.53	0.54	0.54	0.54	0.54	0.6	0.61	0.61	0.59	0.61	0.62	0.63	0.62	0.62	0.61	0.61	0.62	0.67	0.66	0.67	0.65	0.65	0.66	0.64	0.64	0.65	0.66	0.68	0.71		0.69
Sphingomonas lutea KCTC 23642	0.53	0.56	0.54	0.56	0.56	0.54	0.54	0.54	0.54	0.55	0.54	0.54	0.55	0.55	0.55	0.55	0.54	0.54	0.54	0.54	0.55	0.54	0.54	0.61	0.61	0.61	0.6	0.62	0.62	0.63	0.63	0.62	0.61	0.62	0.62	0.67	0.67	0.68	0.66	0.66	0.67	0.65	0.65	0.66	0.68	0.69	0.7	0.69
Sphingomonas agri LMG 29563	0.52	0.54	0.53	0.54	0.54	0.53	0.53	0.52	0.53	0.53	0.53	0.53	0.53	0.54	0.54	0.54	0.53	0.53	0.52	0.53	0.53	0.53	0.53	0.6	0.6	0.6	0.58	0.6	0.6	0.62	0.61	0.6	0.6	0.6	0.61	0.65	0.65	0.66	0.64	0.65	0.65	0.64	0.63	0.64	0.67	0.68	0.69	0.67	0.71
Sphingomonas segetis YJ09	0.53	0.55	0.53	0.55	0.55	0.53	0.53	0.53	0.53	0.54	0.53	0.53	0.53	0.54	0.54	0.54	0.53	0.54	0.52	0.53	0.54	0.53	0.53	0.6	0.6	0.61	0.59	0.6	0.6	0.63	0.62	0.61	0.6	0.61	0.61	0.65	0.66	0.66	0.65	0.65	0.66	0.64	0.64	0.65	0.67	0.69	0.69	0.68	0.72
Zymomonas mobilis ATCC 10988	0.51	0.53	0.51	0.52	0.52	0.51	0.51	0.51	0.51	0.52	0.52	0.52	0.51	0.52	0.52	0.51	0.52	0.51	0.51	0.51	0.52	0.52	0.52	0.54	0.55	0.55	0.53	0.55	0.55	0.53	0.52	0.52	0.51	0.52	0.52	0.53	0.53	0.53	0.53	0.52	0.52	0.52	0.52	0.53	0.53	0.53	0.53	0.53	0.53
Sphingomonas formosensis CC-Nfb-2	0.54	0.56	0.55	0.56	0.56	0.54	0.55	0.56	0.54	0.56	0.54	0.55	0.54	0.55	0.56	0.55	0.55	0.55	0.53	0.54	0.55	0.54	0.55	0.6	0.61	0.61	0.58	0.62	0.62	0.57	0.56	0.55	0.55	0.55	0.56	0.58	0.58	0.58	0.57	0.57	0.58	0.57	0.57	0.58	0.57	0.57	0.58	0.57	0.57
Sphingomonas laterariae LNB2	0.55	0.58	0.55	0.57	0.57	0.55	0.55	0.56	0.56	0.57	0.54	0.56	0.56	0.56	0.57	0.56	0.56	0.56	0.54	0.55	0.56	0.55	0.56	0.6	0.63	0.63	0.59	0.63	0.63	0.58	0.57	0.56	0.56	0.56	0.57	0.59	0.58	0.59	0.58	0.58	0.58	0.57	0.57	0.58	0.58	0.57	0.59	0.58	0.58
Sphingomonas haloaromaticamans P3	0.55	0.58	0.55	0.57	0.57	0.56	0.56	0.57	0.55	0.56	0.55	0.56	0.56	0.57	0.57	0.56	0.56	0.56	0.55	0.55	0.56	0.55	0.56	0.61	0.62	0.63	0.6	0.63	0.63	0.58	0.57	0.56	0.56	0.56	0.57	0.59	0.59	0.59	0.58	0.58	0.58	0.58	0.58	0.58	0.58	0.57	0.59	0.58	0.59
Sphingomonas fennica K101	0.55	0.58	0.55	0.57	0.58	0.56	0.56	0.56	0.56	0.56	0.56	0.56	0.56	0.57	0.57	0.56	0.57	0.56	0.55	0.55	0.56	0.56	0.56	0.61	0.63	0.63	0.6	0.63	0.63	0.58	0.57	0.57	0.56	0.57	0.57	0.59	0.59	0.6	0.58	0.58	0.59	0.58	0.57	0.59	0.58	0.57	0.6	0.58	0.59
Sphingomonas quercus XMGL2	0.55	0.57	0.55	0.57	0.57	0.55	0.56	0.55	0.55	0.57	0.56	0.56	0.57	0.57	0.57	0.56	0.56	0.56	0.55	0.55	0.56	0.55	0.56	0.61	0.61	0.61	0.6	0.62	0.62	0.58	0.57	0.56	0.56	0.56	0.57	0.59	0.59	0.59	0.58	0.58	0.58	0.58	0.58	0.59	0.58	0.58	0.59	0.58	0.59
Sphingomonas morindae NBD5	0.54	0.57	0.55	0.56	0.56	0.55	0.55	0.55	0.55	0.56	0.55	0.56	0.55	0.56	0.56	0.56	0.56	0.55	0.54	0.55	0.55	0.55	0.55	0.6	0.6	0.6	0.58	0.6	0.6	0.56	0.55	0.55	0.55	0.55	0.56	0.58	0.58	0.57	0.57	0.58	0.57	0.57	0.57	0.58	0.57	0.56	0.58	0.57	0.57
Sphingomonas oligoaromativorans DSM 102246	0.55	0.57	0.55	0.56	0.57	0.55	0.54	0.55	0.55	0.56	0.55	0.56	0.55	0.56	0.56	0.56	0.56	0.56	0.54	0.55	0.55	0.54	0.55	0.6	0.6	0.6	0.59	0.61	0.61	0.57	0.56	0.56	0.55	0.56	0.56	0.58	0.58	0.58	0.58	0.58	0.57	0.57	0.57	0.58	0.57	0.57	0.58	0.57	0.57
Sphingomonas chungangi CGMCC 1.13654	0.53	0.56	0.54	0.55	0.55	0.53	0.54	0.54	0.53	0.55	0.54	0.55	0.54	0.55	0.55	0.55	0.55	0.55	0.53	0.53	0.55	0.54	0.55	0.59	0.6	0.59	0.57	0.6	0.6	0.57	0.56	0.55	0.55	0.55	0.56	0.58	0.57	0.57	0.57	0.57	0.57	0.57	0.56	0.57	0.57	0.56	0.58	0.57	0.57
Sphingomonas montanisoli ZX9611	0.53	0.57	0.54	0.55	0.55	0.54	0.54	0.54	0.54	0.55	0.54	0.55	0.55	0.56	0.56	0.55	0.55	0.55	0.53	0.54	0.55	0.55	0.55	0.58	0.6	0.6	0.58	0.61	0.61	0.56	0.55	0.55	0.55	0.55	0.55	0.57	0.57	0.57	0.57	0.56	0.56	0.56	0.56	0.57	0.57	0.56	0.58	0.56	0.57
Sphingomonas crocodyli CCP-7	0.53	0.57	0.54	0.55	0.55	0.53	0.54	0.54	0.54	0.55	0.54	0.54	0.54	0.55	0.55	0.55	0.55	0.55	0.53	0.54	0.55	0.55	0.55	0.58	0.6	0.6	0.57	0.61	0.61	0.56	0.55	0.55	0.55	0.55	0.56	0.57	0.57	0.58	0.57	0.56	0.56	0.56	0.56	0.57	0.57	0.56	0.58	0.56	0.57
Rhizorhabdus argentea DSM 100912	0.53	0.57	0.54	0.55	0.56	0.55	0.55	0.54	0.54	0.56	0.54	0.55	0.55	0.56	0.56	0.55	0.55	0.55	0.54	0.54	0.55	0.54	0.55	0.59	0.6	0.6	0.58	0.61	0.61	0.56	0.55	0.55	0.55	0.55	0.56	0.57	0.57	0.58	0.57	0.57	0.57	0.56	0.56	0.57	0.57	0.56	0.58	0.56	0.57
Rhizorhabdus dicambivorans Ndbn-20	0.54	0.57	0.54	0.56	0.56	0.55	0.54	0.55	0.55	0.56	0.54	0.55	0.55	0.55	0.55	0.55	0.55	0.55	0.54	0.54	0.56	0.55	0.55	0.59	0.6	0.6	0.58	0.61	0.61	0.56	0.55	0.55	0.55	0.55	0.56	0.57	0.57	0.58	0.57	0.56	0.57	0.56	0.56	0.57	0.57	0.56	0.58	0.57	0.57
Rhizorhabdus phycosphaerae MK52	0.54	0.57	0.54	0.56	0.57	0.55	0.55	0.55	0.55	0.56	0.54	0.56	0.55	0.56	0.56	0.56	0.56	0.55	0.54	0.55	0.56	0.55	0.56	0.59	0.61	0.6	0.58	0.61	0.61	0.57	0.56	0.55	0.55	0.55	0.56	0.57	0.57	0.58	0.57	0.57	0.57	0.57	0.56	0.58	0.57	0.56	0.58	0.57	0.57
Rhizorhabdus histidinilytica UM2	0.54	0.57	0.54	0.57	0.57	0.54	0.54	0.55	0.54	0.56	0.54	0.55	0.55	0.56	0.56	0.55	0.55	0.55	0.54	0.54	0.55	0.55	0.55	0.59	0.6	0.6	0.58	0.61	0.61	0.57	0.55	0.55	0.55	0.55	0.56	0.57	0.57	0.58	0.57	0.57	0.57	0.57	0.56	0.58	0.57	0.56	0.58	0.57	0.57
Rhizorhabdus wittichii RW1	0.53	0.57	0.54	0.57	0.57	0.54	0.54	0.55	0.54	0.56	0.54	0.55	0.55	0.56	0.56	0.55	0.55	0.54	0.54	0.54	0.55	0.54	0.55	0.59	0.6	0.6	0.57	0.61	0.61	0.57	0.55	0.55	0.55	0.56	0.56	0.58	0.57	0.58	0.57	0.56	0.57	0.56	0.56	0.57	0.57	0.57	0.58	0.57	0.57
Sphingomonas solaris R4DWN	0.53	0.57	0.55	0.56	0.56	0.55	0.55	0.55	0.55	0.56	0.56	0.57	0.57	0.57	0.57	0.57	0.56	0.56	0.55	0.55	0.56	0.55	0.56	0.6	0.62	0.61	0.59	0.62	0.62	0.58	0.56	0.56	0.56	0.56	0.57	0.59	0.58	0.59	0.58	0.59	0.58	0.57	0.57	0.58	0.58	0.57	0.59	0.58	0.58
Sphingomonas profundi LMO 1	0.53	0.58	0.55	0.56	0.57	0.55	0.55	0.54	0.55	0.56	0.56	0.56	0.56	0.57	0.57	0.57	0.56	0.56	0.54	0.54	0.56	0.55	0.56	0.61	0.62	0.62	0.59	0.62	0.63	0.58	0.56	0.56	0.56	0.56	0.57	0.58	0.58	0.58	0.58	0.58	0.58	0.58	0.57	0.58	0.58	0.57	0.59	0.58	0.58
Sphingomonas oleivorans FW-11	0.55	0.58	0.55	0.58	0.57	0.56	0.56	0.55	0.55	0.57	0.55	0.56	0.57	0.57	0.57	0.57	0.57	0.56	0.55	0.55	0.57	0.56	0.56	0.61	0.62	0.62	0.6	0.63	0.63	0.58	0.57	0.56	0.56	0.56	0.57	0.59	0.58	0.59	0.58	0.58	0.58	0.58	0.57	0.58	0.58	0.57	0.59	0.58	0.58
Sphingomonas naphthae KACC 18716	0.54	0.57	0.54	0.55	0.56	0.54	0.54	0.55	0.54	0.55	0.54	0.55	0.55	0.56	0.56	0.56	0.56	0.55	0.54	0.54	0.55	0.54	0.55	0.59	0.6	0.6	0.58	0.61	0.61	0.57	0.55	0.55	0.55	0.55	0.56	0.58	0.58	0.58	0.57	0.57	0.57	0.57	0.56	0.58	0.57	0.56	0.58	0.57	0.57
Sphingomonas crusticola MIMD3	0.54	0.57	0.55	0.56	0.56	0.55	0.55	0.54	0.55	0.56	0.56	0.56	0.56	0.56	0.57	0.56	0.57	0.56	0.55	0.54	0.55	0.55	0.55	0.6	0.6	0.6	0.59	0.6	0.61	0.57	0.55	0.55	0.55	0.55	0.56	0.57	0.58	0.58	0.57	0.58	0.58	0.57	0.57	0.58	0.58	0.57	0.58	0.57	0.58
Sphingomonas vulcanisoli CECT 8804	0.52	0.56	0.54	0.55	0.56	0.55	0.55	0.54	0.54	0.56	0.56	0.55	0.55	0.56	0.56	0.56	0.56	0.55	0.54	0.54	0.56	0.55	0.55	0.58	0.59	0.59	0.57	0.6	0.6	0.56	0.55	0.55	0.55	0.55	0.55	0.57	0.57	0.57	0.57	0.57	0.57	0.56	0.56	0.57	0.57	0.56	0.58	0.57	0.57
Sphingomonas jatrophae S5-249	0.54	0.58	0.55	0.56	0.56	0.55	0.55	0.55	0.55	0.56	0.56	0.56	0.56	0.56	0.57	0.56	0.57	0.56	0.54	0.55	0.56	0.55	0.56	0.61	0.61	0.61	0.59	0.61	0.62	0.57	0.56	0.56	0.56	0.56	0.57	0.59	0.58	0.59	0.58	0.59	0.58	0.58	0.58	0.58	0.58	0.57	0.59	0.58	0.58
Sphingomonas montana W16RD	0.54	0.57	0.55	0.56	0.56	0.55	0.55	0.54	0.55	0.56	0.56	0.56	0.57	0.57	0.57	0.57	0.57	0.57	0.54	0.54	0.56	0.55	0.56	0.6	0.61	0.61	0.59	0.61	0.61	0.57	0.56	0.56	0.56	0.56	0.56	0.58	0.58	0.58	0.57	0.58	0.57	0.57	0.57	0.58	0.57	0.57	0.58	0.57	0.58
Sphingomonas arantia CGMCC 1.12702	0.54	0.57	0.55	0.56	0.56	0.55	0.55	0.55	0.55	0.56	0.57	0.56	0.56	0.57	0.57	0.57	0.57	0.57	0.55	0.54	0.55	0.55	0.56	0.6	0.61	0.6	0.59	0.61	0.61	0.57	0.56	0.55	0.56	0.56	0.56	0.58	0.58	0.58	0.57	0.58	0.57	0.57	0.57	0.58	0.58	0.57	0.58	0.57	0.58
Sphingomonas prati W18RD	0.53	0.57	0.55	0.56	0.56	0.55	0.55	0.55	0.55	0.56	0.56	0.56	0.56	0.57	0.57	0.57	0.57	0.56	0.55	0.54	0.55	0.55	0.56	0.6	0.61	0.6	0.59	0.61	0.61	0.57	0.56	0.56	0.55	0.56	0.56	0.58	0.58	0.58	0.57	0.58	0.58	0.57	0.57	0.58	0.58	0.57	0.58	0.57	0.58
Sphingomonas cavernae K2R01-6	0.54	0.58	0.56	0.57	0.57	0.55	0.55	0.55	0.55	0.56	0.55	0.55	0.56	0.57	0.57	0.56	0.56	0.56	0.55	0.55	0.56	0.55	0.56	0.61	0.62	0.63	0.6	0.63	0.63	0.58	0.57	0.57	0.56	0.57	0.57	0.59	0.58	0.59	0.58	0.58	0.59	0.57	0.57	0.58	0.58	0.58	0.59	0.58	0.59
Sphingobium boeckii DSM 25079	0.53	0.57	0.55	0.56	0.56	0.54	0.54	0.54	0.55	0.56	0.54	0.55	0.55	0.56	0.56	0.56	0.56	0.56	0.54	0.54	0.55	0.55	0.55	0.6	0.62	0.62	0.59	0.62	0.62	0.58	0.56	0.56	0.56	0.56	0.57	0.58	0.58	0.59	0.58	0.57	0.58	0.57	0.57	0.58	0.57	0.57	0.59	0.58	0.58
Sphingomonas colocasiae JCM-31229	0.54	0.58	0.55	0.58	0.57	0.54	0.54	0.55	0.55	0.56	0.54	0.55	0.55	0.56	0.56	0.55	0.55	0.55	0.54	0.54	0.55	0.54	0.55	0.6	0.62	0.62	0.59	0.62	0.62	0.58	0.56	0.56	0.56	0.56	0.57	0.59	0.59	0.59	0.58	0.57	0.58	0.57	0.57	0.58	0.57	0.57	0.59	0.58	0.58
Sphingomonas sanxanigenens NX02	0.54	0.57	0.54	0.55	0.56	0.54	0.55	0.55	0.56	0.55	0.54	0.55	0.56	0.56	0.56	0.56	0.56	0.56	0.54	0.54	0.55	0.54	0.55	0.6	0.61	0.6	0.59	0.61	0.61	0.57	0.55	0.55	0.55	0.55	0.56	0.57	0.57	0.58	0.57	0.57	0.57	0.57	0.57	0.58	0.57	0.56	0.58	0.57	0.57
Sphingomonas zeicaulis DSM 100587 ga0373354 contigs	0.54	0.57	0.55	0.55	0.56	0.54	0.54	0.54	0.55	0.55	0.55	0.54	0.55	0.56	0.56	0.56	0.56	0.55	0.54	0.54	0.55	0.54	0.55	0.6	0.61	0.61	0.59	0.61	0.61	0.57	0.55	0.55	0.55	0.55	0.56	0.58	0.57	0.58	0.57	0.58	0.57	0.56	0.57	0.58	0.58	0.56	0.58	0.57	0.57
Sphingomonas flavalba ZLT-5	0.55	0.58	0.56	0.58	0.58	0.56	0.56	0.56	0.56	0.57	0.56	0.57	0.56	0.57	0.57	0.57	0.57	0.57	0.55	0.56	0.57	0.56	0.57	0.62	0.63	0.63	0.6	0.63	0.63	0.58	0.57	0.57	0.57	0.57	0.58	0.6	0.59	0.6	0.59	0.58	0.59	0.59	0.58	0.59	0.59	0.59	0.6	0.59	0.59
Sphingomonas changbaiensis NBRC 104936	0.54	0.58	0.55	0.57	0.57	0.56	0.56	0.55	0.55	0.57	0.56	0.56	0.56	0.57	0.57	0.57	0.56	0.56	0.55	0.56	0.56	0.56	0.56	0.62	0.62	0.62	0.6	0.62	0.63	0.58	0.57	0.57	0.56	0.56	0.57	0.59	0.59	0.59	0.59	0.59	0.59	0.59	0.58	0.59	0.59	0.59	0.6	0.59	0.59
Sphingomonas jejuensis DSM 27651	0.53	0.57	0.55	0.56	0.57	0.55	0.55	0.55	0.54	0.56	0.55	0.56	0.56	0.56	0.57	0.56	0.56	0.56	0.54	0.55	0.56	0.55	0.55	0.6	0.61	0.61	0.59	0.61	0.61	0.58	0.56	0.56	0.56	0.56	0.57	0.59	0.58	0.58	0.58	0.58	0.58	0.58	0.57	0.59	0.58	0.58	0.59	0.58	0.58
Sphingomonas gilva ZDH117	0.54	0.57	0.56	0.57	0.57	0.55	0.55	0.55	0.55	0.56	0.55	0.56	0.56	0.56	0.57	0.56	0.56	0.56	0.54	0.55	0.56	0.55	0.56	0.61	0.62	0.62	0.6	0.62	0.62	0.58	0.57	0.57	0.57	0.57	0.57	0.59	0.59	0.59	0.58	0.59	0.59	0.58	0.58	0.59	0.59	0.58	0.6	0.59	0.59
Sphingomonas cannabina DM2-R-LB4	0.55	0.57	0.56	0.56	0.57	0.55	0.55	0.55	0.55	0.56	0.55	0.56	0.55	0.56	0.56	0.55	0.56	0.55	0.54	0.54	0.55	0.54	0.55	0.6	0.6	0.6	0.6	0.61	0.61	0.57	0.56	0.56	0.56	0.56	0.57	0.59	0.59	0.59	0.58	0.58	0.58	0.58	0.57	0.58	0.58	0.58	0.59	0.58	0.58
Sphingomonas floccifaciens CGMCC 1.15797	0.53	0.56	0.55	0.55	0.55	0.54	0.54	0.54	0.54	0.55	0.55	0.55	0.55	0.55	0.56	0.56	0.56	0.55	0.54	0.54	0.55	0.54	0.55	0.59	0.6	0.59	0.58	0.6	0.6	0.57	0.56	0.56	0.55	0.56	0.56	0.58	0.58	0.58	0.57	0.58	0.57	0.57	0.58	0.58	0.58	0.56	0.58	0.57	0.58
Sphingomonas guangdongensis CGMCC 1.12672	0.53	0.56	0.55	0.55	0.56	0.55	0.55	0.55	0.54	0.55	0.55	0.55	0.55	0.55	0.56	0.56	0.56	0.55	0.54	0.54	0.55	0.54	0.55	0.59	0.6	0.6	0.58	0.6	0.6	0.57	0.56	0.55	0.55	0.56	0.56	0.58	0.58	0.58	0.57	0.58	0.58	0.57	0.58	0.58	0.58	0.57	0.58	0.57	0.57
Sphingomonas desiccabilis CP1D	0.54	0.57	0.55	0.56	0.57	0.55	0.55	0.55	0.55	0.55	0.55	0.55	0.56	0.56	0.57	0.56	0.57	0.56	0.55	0.55	0.56	0.55	0.56	0.6	0.61	0.6	0.6	0.61	0.61	0.57	0.56	0.56	0.55	0.56	0.57	0.58	0.58	0.59	0.58	0.58	0.58	0.58	0.58	0.59	0.58	0.57	0.59	0.58	0.58
Sphingomonas hankookensis KCTC 22579	0.53	0.56	0.54	0.55	0.55	0.54	0.54	0.54	0.54	0.55	0.54	0.55	0.55	0.55	0.56	0.55	0.56	0.55	0.54	0.54	0.55	0.54	0.55	0.58	0.59	0.59	0.58	0.59	0.6	0.57	0.55	0.56	0.55	0.55	0.56	0.58	0.57	0.58	0.57	0.57	0.57	0.57	0.57	0.57	0.57	0.57	0.58	0.57	0.57
Sphingomonas panni DSM 15761	0.53	0.56	0.54	0.55	0.55	0.55	0.54	0.54	0.54	0.55	0.55	0.55	0.55	0.55	0.56	0.55	0.56	0.55	0.54	0.54	0.55	0.54	0.55	0.58	0.59	0.59	0.58	0.59	0.6	0.57	0.55	0.56	0.55	0.55	0.56	0.57	0.57	0.57	0.57	0.57	0.57	0.57	0.57	0.57	0.57	0.56	0.57	0.57	0.57
Sphingomonas aestuarii DSM 19475	0.53	0.57	0.55	0.56	0.56	0.55	0.54	0.55	0.56	0.56	0.54	0.55	0.56	0.56	0.56	0.56	0.56	0.56	0.54	0.55	0.56	0.55	0.56	0.6	0.61	0.61	0.58	0.61	0.61	0.58	0.57	0.57	0.56	0.57	0.57	0.59	0.58	0.58	0.58	0.57	0.58	0.57	0.57	0.58	0.58	0.57	0.59	0.58	0.58
Sphingomonas japonica KC 7	0.54	0.57	0.55	0.56	0.57	0.56	0.55	0.54	0.55	0.57	0.56	0.56	0.56	0.57	0.57	0.57	0.57	0.56	0.55	0.55	0.56	0.56	0.56	0.6	0.61	0.61	0.59	0.61	0.61	0.58	0.57	0.57	0.56	0.57	0.57	0.59	0.59	0.59	0.58	0.58	0.59	0.58	0.58	0.59	0.58	0.58	0.59	0.58	0.58
Sphingomonas baiyangensis L-1-4	0.53	0.57	0.56	0.56	0.56	0.56	0.55	0.55	0.55	0.56	0.55	0.56	0.56	0.57	0.57	0.57	0.57	0.56	0.55	0.55	0.56	0.55	0.56	0.6	0.61	0.61	0.59	0.61	0.61	0.58	0.56	0.57	0.56	0.57	0.57	0.59	0.58	0.59	0.58	0.58	0.58	0.58	0.58	0.59	0.58	0.57	0.59	0.58	0.58
Sphingomonas spermidinifaciens 9NM-10	0.53	0.57	0.55	0.56	0.57	0.55	0.55	0.54	0.55	0.56	0.55	0.56	0.57	0.56	0.57	0.56	0.56	0.56	0.55	0.55	0.56	0.55	0.56	0.6	0.6	0.6	0.59	0.6	0.61	0.58	0.56	0.56	0.56	0.56	0.57	0.58	0.58	0.58	0.58	0.58	0.58	0.57	0.58	0.58	0.58	0.57	0.59	0.58	0.58
Sphingomonas yantingensis DSM 27244	0.53	0.57	0.55	0.56	0.56	0.55	0.54	0.54	0.54	0.56	0.56	0.56	0.56	0.56	0.56	0.56	0.56	0.55	0.54	0.54	0.56	0.55	0.56	0.59	0.6	0.6	0.59	0.6	0.61	0.57	0.56	0.56	0.56	0.56	0.57	0.58	0.58	0.58	0.58	0.58	0.58	0.57	0.58	0.58	0.58	0.57	0.59	0.57	0.58
Sphingosinithalassobacter tenebrarum zrk23	0.53	0.55	0.55	0.55	0.55	0.54	0.54	0.54	0.54	0.54	0.53	0.54	0.54	0.55	0.55	0.54	0.54	0.54	0.53	0.53	0.54	0.54	0.54	0.59	0.59	0.59	0.57	0.59	0.6	0.57	0.56	0.56	0.55	0.56	0.57	0.57	0.57	0.57	0.57	0.56	0.57	0.56	0.56	0.57	0.56	0.56	0.58	0.57	0.57
Sphingosinithalassobacter portus FM6	0.53	0.56	0.55	0.55	0.55	0.54	0.54	0.54	0.54	0.55	0.54	0.54	0.54	0.55	0.55	0.55	0.55	0.55	0.53	0.53	0.55	0.54	0.54	0.59	0.6	0.6	0.57	0.6	0.6	0.57	0.56	0.56	0.56	0.56	0.57	0.58	0.57	0.58	0.57	0.57	0.57	0.56	0.56	0.57	0.57	0.56	0.58	0.57	0.57
Stakelama sediminis DSM 27203	0.53	0.56	0.54	0.56	0.56	0.54	0.54	0.55	0.54	0.55	0.54	0.55	0.55	0.55	0.55	0.55	0.55	0.55	0.54	0.54	0.55	0.54	0.55	0.59	0.6	0.59	0.58	0.6	0.6	0.57	0.56	0.56	0.56	0.56	0.57	0.58	0.57	0.58	0.57	0.57	0.57	0.57	0.56	0.57	0.57	0.57	0.58	0.58	0.57
Stakelama flava CBK3Z-3	0.53	0.56	0.55	0.55	0.56	0.54	0.54	0.54	0.54	0.55	0.54	0.54	0.55	0.55	0.55	0.55	0.55	0.54	0.53	0.53	0.55	0.54	0.55	0.59	0.59	0.6	0.58	0.6	0.6	0.57	0.56	0.56	0.56	0.56	0.57	0.58	0.58	0.58	0.57	0.57	0.57	0.56	0.57	0.57	0.57	0.57	0.58	0.57	0.57
Stakelama pacifica DSM 25059	0.53	0.55	0.55	0.55	0.56	0.54	0.54	0.54	0.54	0.55	0.54	0.55	0.55	0.55	0.55	0.54	0.55	0.54	0.53	0.54	0.54	0.53	0.55	0.59	0.6	0.59	0.58	0.6	0.6	0.57	0.56	0.56	0.55	0.56	0.56	0.57	0.57	0.58	0.57	0.57	0.57	0.57	0.56	0.57	0.57	0.56	0.58	0.57	0.57
Sphingomonas turrisvirgatae MCT13	0.53	0.56	0.55	0.56	0.56	0.55	0.54	0.54	0.55	0.55	0.54	0.55	0.55	0.55	0.56	0.55	0.55	0.55	0.54	0.54	0.55	0.54	0.55	0.59	0.6	0.6	0.58	0.61	0.61	0.57	0.56	0.56	0.55	0.56	0.56	0.58	0.58	0.58	0.57	0.57	0.57	0.57	0.57	0.57	0.58	0.57	0.58	0.57	0.57
Sphingomonas suaedae XS-10	0.53	0.56	0.55	0.56	0.56	0.54	0.54	0.55	0.55	0.55	0.54	0.54	0.55	0.55	0.56	0.55	0.55	0.55	0.54	0.54	0.55	0.54	0.55	0.59	0.6	0.6	0.58	0.61	0.61	0.58	0.56	0.56	0.56	0.56	0.57	0.57	0.58	0.58	0.57	0.57	0.58	0.57	0.58	0.58	0.58	0.57	0.58	0.58	0.58
Sphingomonas koreensis KCTC 2882	0.53	0.57	0.55	0.56	0.57	0.54	0.54	0.55	0.55	0.55	0.54	0.55	0.55	0.55	0.55	0.55	0.56	0.55	0.54	0.54	0.55	0.54	0.55	0.59	0.6	0.6	0.58	0.61	0.61	0.58	0.56	0.56	0.55	0.56	0.56	0.58	0.58	0.58	0.57	0.57	0.57	0.57	0.57	0.58	0.57	0.57	0.58	0.58	0.58
Sphingomonas canadensis DSM 29393	0.53	0.56	0.54	0.56	0.56	0.54	0.54	0.54	0.54	0.55	0.54	0.54	0.55	0.55	0.55	0.55	0.55	0.55	0.54	0.54	0.55	0.55	0.55	0.59	0.6	0.6	0.58	0.6	0.6	0.57	0.56	0.56	0.55	0.56	0.57	0.58	0.58	0.58	0.57	0.57	0.57	0.57	0.57	0.57	0.57	0.57	0.58	0.57	0.58
Sphingomonas pokkalii L3B27	0.53	0.56	0.54	0.55	0.55	0.54	0.54	0.54	0.54	0.55	0.54	0.54	0.55	0.55	0.56	0.55	0.55	0.55	0.54	0.54	0.55	0.54	0.55	0.59	0.59	0.59	0.58	0.6	0.6	0.57	0.56	0.56	0.55	0.56	0.56	0.58	0.58	0.58	0.57	0.57	0.58	0.57	0.57	0.58	0.57	0.56	0.58	0.57	0.57
Sphingomonas pituitosa NBRC 102491	0.53	0.56	0.55	0.55	0.55	0.54	0.54	0.53	0.54	0.55	0.54	0.55	0.55	0.55	0.55	0.55	0.55	0.55	0.54	0.53	0.55	0.54	0.55	0.59	0.59	0.59	0.59	0.6	0.6	0.57	0.55	0.55	0.55	0.56	0.56	0.58	0.58	0.58	0.57	0.58	0.57	0.57	0.57	0.58	0.58	0.56	0.58	0.57	0.57
Sphingomonas trueperi DSM 7225	0.54	0.56	0.54	0.55	0.56	0.55	0.54	0.54	0.54	0.55	0.54	0.55	0.55	0.55	0.55	0.55	0.55	0.55	0.53	0.54	0.55	0.54	0.55	0.59	0.59	0.59	0.59	0.6	0.6	0.57	0.56	0.56	0.55	0.56	0.56	0.57	0.57	0.58	0.57	0.58	0.57	0.57	0.57	0.57	0.58	0.56	0.58	0.57	0.57
Sphingomonas azotifigens NBRC 15497	0.53	0.55	0.54	0.55	0.55	0.54	0.54	0.54	0.54	0.54	0.54	0.54	0.55	0.55	0.55	0.55	0.55	0.55	0.53	0.53	0.55	0.54	0.55	0.59	0.59	0.59	0.59	0.6	0.6	0.57	0.55	0.55	0.55	0.55	0.56	0.57	0.58	0.58	0.57	0.58	0.57	0.57	0.56	0.58	0.58	0.56	0.58	0.57	0.57
Sphingomonas soli NBRC 100801	0.53	0.56	0.55	0.55	0.56	0.54	0.54	0.54	0.54	0.55	0.54	0.55	0.55	0.55	0.56	0.55	0.55	0.55	0.53	0.54	0.55	0.54	0.55	0.6	0.6	0.6	0.58	0.6	0.61	0.57	0.56	0.56	0.56	0.56	0.57	0.58	0.58	0.58	0.57	0.57	0.57	0.57	0.57	0.58	0.58	0.57	0.58	0.58	0.57
Sphingomonas kyeonggiensis DSM 101806	0.53	0.56	0.54	0.55	0.55	0.53	0.53	0.54	0.54	0.55	0.53	0.54	0.54	0.55	0.55	0.54	0.55	0.54	0.53	0.53	0.54	0.53	0.54	0.59	0.59	0.59	0.58	0.6	0.6	0.56	0.55	0.55	0.54	0.55	0.55	0.57	0.57	0.57	0.56	0.57	0.57	0.56	0.56	0.57	0.57	0.56	0.58	0.56	0.57
Sphingomonas leidyi DSM 4733	0.53	0.56	0.54	0.55	0.55	0.54	0.54	0.54	0.54	0.55	0.54	0.55	0.55	0.55	0.55	0.54	0.54	0.55	0.53	0.53	0.55	0.54	0.54	0.6	0.59	0.59	0.58	0.6	0.6	0.57	0.55	0.55	0.55	0.55	0.56	0.57	0.58	0.57	0.57	0.57	0.57	0.57	0.56	0.57	0.57	0.57	0.58	0.57	0.57
Sphingomonas hengshuiensis WHSC-8	0.53	0.56	0.55	0.55	0.56	0.54	0.54	0.53	0.54	0.55	0.54	0.55	0.55	0.55	0.56	0.56	0.56	0.55	0.54	0.54	0.55	0.54	0.55	0.59	0.6	0.59	0.58	0.6	0.6	0.57	0.55	0.55	0.55	0.55	0.56	0.57	0.57	0.58	0.57	0.57	0.57	0.56	0.57	0.57	0.57	0.56	0.58	0.57	0.57
Sphingomonas xinjiangensis DSM 26736	0.53	0.56	0.54	0.55	0.54	0.54	0.53	0.53	0.54	0.55	0.54	0.54	0.55	0.55	0.55	0.55	0.55	0.55	0.53	0.53	0.54	0.54	0.55	0.59	0.59	0.59	0.6	0.6	0.6	0.57	0.56	0.55	0.55	0.55	0.56	0.57	0.57	0.58	0.57	0.57	0.57	0.57	0.56	0.58	0.58	0.56	0.58	0.57	0.57
Sphingomonas naasensis DSM 100060	0.54	0.56	0.55	0.55	0.55	0.54	0.54	0.54	0.54	0.55	0.54	0.55	0.55	0.56	0.55	0.55	0.55	0.55	0.54	0.53	0.55	0.54	0.55	0.6	0.6	0.6	0.59	0.61	0.61	0.57	0.56	0.56	0.55	0.56	0.56	0.58	0.58	0.58	0.57	0.57	0.58	0.57	0.57	0.58	0.58	0.57	0.58	0.57	0.58
Sphingomonas psychrotolerans Cra20	0.53	0.56	0.55	0.55	0.55	0.53	0.54	0.54	0.54	0.55	0.54	0.54	0.55	0.56	0.56	0.55	0.55	0.55	0.53	0.53	0.54	0.54	0.55	0.59	0.6	0.59	0.59	0.6	0.6	0.57	0.56	0.56	0.55	0.55	0.56	0.57	0.58	0.58	0.57	0.57	0.58	0.57	0.57	0.57	0.58	0.57	0.58	0.57	0.57
Sphingomonas gei ZFGT-11	0.53	0.56	0.55	0.55	0.56	0.54	0.53	0.54	0.54	0.55	0.54	0.55	0.55	0.55	0.55	0.55	0.56	0.55	0.53	0.53	0.55	0.54	0.54	0.59	0.6	0.6	0.6	0.6	0.61	0.57	0.55	0.55	0.55	0.55	0.56	0.57	0.58	0.58	0.57	0.57	0.57	0.57	0.56	0.57	0.58	0.57	0.58	0.57	0.58
Hephaestia caeni DSM 25527	0.54	0.56	0.55	0.56	0.56	0.55	0.54	0.57	0.55	0.55	0.54	0.55	0.55	0.55	0.56	0.55	0.55	0.55	0.53	0.54	0.55	0.54	0.54	0.6	0.6	0.6	0.58	0.6	0.6	0.58	0.56	0.56	0.56	0.56	0.56	0.58	0.58	0.58	0.57	0.57	0.57	0.57	0.56	0.58	0.57	0.57	0.58	0.57	0.57
Hephaestia mangrovi CMS5P-6	0.5343	0.5604	0.55	0.563	0.5617	0.5451	0.5437	0.5415	0.5453	0.5566	0.551	0.5512	0.5509	0.554	0.5585	0.552	0.5542	0.551	0.5394	0.5376	0.5493	0.5433	0.548	0.6004	0.6021	0.5974	0.5828	0.6042	0.6039	0.5739	0.5624	0.5615	0.5562	0.5592	0.5637	0.5789	0.5795	0.5828	0.5774	0.5769	0.5734	0.5727	0.5664	0.5752	0.5726	0.5757	0.5825	0.5729	0.5755
Sphingomonas aracearum WZY 27	0.53	0.56	0.55	0.56	0.55	0.54	0.54	0.54	0.54	0.55	0.55	0.55	0.55	0.55	0.56	0.55	0.55	0.55	0.54	0.54	0.55	0.55	0.55	0.59	0.6	0.59	0.58	0.59	0.6	0.57	0.56	0.56	0.55	0.56	0.56	0.58	0.58	0.58	0.57	0.58	0.58	0.57	0.57	0.58	0.57	0.57	0.58	0.57	0.57
Sphingomonas aquatica LMG 28596	0.53	0.56	0.54	0.56	0.56	0.56	0.55	0.54	0.55	0.56	0.55	0.56	0.56	0.56	0.57	0.56	0.56	0.56	0.55	0.56	0.56	0.56	0.56	0.59	0.6	0.6	0.57	0.6	0.6	0.57	0.56	0.56	0.55	0.56	0.57	0.58	0.57	0.58	0.58	0.57	0.57	0.57	0.57	0.58	0.57	0.56	0.58	0.57	0.58
Sphingomonas panacis DCY99	0.53	0.55	0.54	0.55	0.55	0.53	0.54	0.54	0.54	0.55	0.55	0.54	0.54	0.54	0.55	0.55	0.55	0.55	0.53	0.53	0.54	0.54	0.54	0.59	0.59	0.59	0.58	0.59	0.6	0.56	0.55	0.55	0.54	0.55	0.55	0.57	0.57	0.57	0.56	0.57	0.56	0.56	0.56	0.57	0.57	0.56	0.57	0.57	0.57
Sphingomonas populi 3-7	0.52	0.55	0.54	0.55	0.55	0.53	0.54	0.53	0.53	0.54	0.54	0.55	0.54	0.54	0.55	0.55	0.55	0.54	0.53	0.53	0.54	0.53	0.54	0.58	0.59	0.58	0.57	0.59	0.6	0.56	0.55	0.55	0.54	0.55	0.55	0.57	0.57	0.57	0.56	0.57	0.56	0.56	0.56	0.57	0.57	0.56	0.57	0.56	0.57
Sphingomonas psychrolutea CGMCC 1.10106	0.52	0.56	0.54	0.55	0.55	0.54	0.54	0.53	0.54	0.56	0.56	0.56	0.56	0.56	0.56	0.56	0.56	0.55	0.55	0.54	0.56	0.55	0.55	0.59	0.59	0.59	0.57	0.6	0.6	0.57	0.56	0.56	0.55	0.55	0.56	0.57	0.58	0.58	0.57	0.57	0.57	0.57	0.57	0.58	0.57	0.57	0.58	0.56	0.57
Sphingomonas glacialis CGMCC 1.8957	0.53	0.56	0.54	0.55	0.55	0.54	0.54	0.54	0.54	0.56	0.56	0.56	0.55	0.56	0.56	0.56	0.56	0.56	0.55	0.54	0.55	0.55	0.55	0.58	0.59	0.59	0.58	0.59	0.6	0.57	0.55	0.55	0.55	0.55	0.56	0.57	0.57	0.58	0.57	0.58	0.57	0.57	0.57	0.58	0.57	0.56	0.57	0.56	0.57
Sphingomonas echinoides ATCC 14820	0.52	0.56	0.54	0.55	0.55	0.54	0.54	0.53	0.54	0.56	0.55	0.55	0.55	0.56	0.56	0.55	0.56	0.55	0.54	0.54	0.55	0.54	0.55	0.59	0.6	0.59	0.58	0.6	0.6	0.57	0.55	0.55	0.55	0.55	0.56	0.58	0.58	0.58	0.57	0.57	0.57	0.57	0.57	0.58	0.57	0.56	0.58	0.56	0.57
Sphingomonas alpina DSM 22537	0.53	0.57	0.54	0.56	0.55	0.54	0.54	0.54	0.54	0.55	0.54	0.55	0.55	0.56	0.56	0.56	0.55	0.56	0.54	0.53	0.55	0.54	0.55	0.59	0.6	0.6	0.58	0.61	0.6	0.57	0.55	0.55	0.55	0.55	0.56	0.57	0.58	0.58	0.57	0.57	0.57	0.57	0.56	0.57	0.57	0.57	0.58	0.57	0.57
Sphingomonas aliaeris DH-S5	0.52	0.57	0.55	0.55	0.55	0.54	0.54	0.53	0.54	0.56	0.55	0.55	0.56	0.55	0.56	0.55	0.56	0.56	0.54	0.54	0.55	0.54	0.55	0.59	0.6	0.59	0.58	0.6	0.6	0.57	0.55	0.55	0.55	0.55	0.56	0.57	0.58	0.58	0.57	0.57	0.57	0.57	0.57	0.57	0.57	0.56	0.57	0.57	0.57
Sphingomonas qilianensis KCTC 42862	0.53	0.57	0.55	0.56	0.56	0.55	0.55	0.54	0.54	0.57	0.56	0.56	0.57	0.57	0.57	0.57	0.57	0.56	0.55	0.54	0.55	0.55	0.56	0.59	0.6	0.6	0.59	0.6	0.6	0.57	0.56	0.56	0.55	0.56	0.56	0.58	0.58	0.58	0.57	0.58	0.57	0.57	0.57	0.58	0.57	0.57	0.58	0.57	0.58
Sphingomonas hylomeconis KCTC 42739	0.52	0.56	0.54	0.55	0.55	0.54	0.54	0.54	0.54	0.56	0.56	0.56	0.57	0.57	0.57	0.57	0.56	0.56	0.55	0.54	0.55	0.55	0.56	0.59	0.6	0.59	0.58	0.6	0.6	0.57	0.55	0.55	0.55	0.55	0.56	0.58	0.58	0.58	0.57	0.58	0.57	0.58	0.57	0.58	0.57	0.57	0.58	0.57	0.57
Sphingomonas panacisoli HKS19	0.52	0.56	0.54	0.56	0.55	0.54	0.54	0.53	0.54	0.55	0.55	0.55	0.55	0.56	0.56	0.55	0.55	0.55	0.53	0.54	0.55	0.54	0.55	0.59	0.59	0.59	0.57	0.6	0.6	0.57	0.56	0.56	0.55	0.55	0.56	0.58	0.58	0.57	0.57	0.57	0.57	0.57	0.57	0.57	0.57	0.57	0.58	0.57	0.57
Sphingomonas pruni NBRC 15498	0.53	0.56	0.55	0.56	0.55	0.54	0.54	0.54	0.54	0.55	0.55	0.55	0.54	0.55	0.55	0.55	0.55	0.55	0.53	0.54	0.55	0.54	0.55	0.6	0.59	0.59	0.58	0.6	0.6	0.57	0.55	0.55	0.55	0.55	0.56	0.57	0.58	0.58	0.57	0.57	0.57	0.57	0.56	0.57	0.57	0.56	0.57	0.57	0.57
Sphingomonas mali NBRC 15500	0.53	0.56	0.54	0.55	0.55	0.53	0.53	0.53	0.53	0.55	0.54	0.54	0.54	0.55	0.55	0.55	0.55	0.55	0.53	0.53	0.54	0.54	0.55	0.59	0.59	0.59	0.57	0.6	0.6	0.57	0.55	0.55	0.55	0.55	0.56	0.57	0.58	0.57	0.57	0.57	0.57	0.56	0.57	0.57	0.57	0.56	0.57	0.56	0.57
Sphingomonas asaccharolytica NBRC 15499	0.53	0.56	0.54	0.55	0.55	0.53	0.53	0.53	0.53	0.55	0.54	0.54	0.54	0.55	0.55	0.55	0.55	0.54	0.53	0.53	0.54	0.54	0.54	0.59	0.59	0.59	0.58	0.59	0.6	0.57	0.55	0.55	0.55	0.55	0.56	0.57	0.57	0.58	0.57	0.57	0.57	0.57	0.57	0.57	0.57	0.56	0.57	0.57	0.57
Sphingomonas radiodurans S9-5	0.52	0.56	0.54	0.55	0.55	0.55	0.55	0.54	0.54	0.57	0.55	0.55	0.56	0.56	0.57	0.56	0.56	0.56	0.55	0.55	0.55	0.55	0.56	0.59	0.6	0.59	0.58	0.6	0.6	0.57	0.56	0.55	0.55	0.56	0.56	0.58	0.57	0.58	0.57	0.58	0.57	0.57	0.57	0.58	0.57	0.56	0.58	0.57	0.57
Sphingomonas jeddahensis G39	0.53	0.57	0.55	0.56	0.56	0.55	0.55	0.55	0.54	0.56	0.55	0.55	0.56	0.56	0.56	0.56	0.56	0.56	0.55	0.55	0.56	0.55	0.56	0.6	0.61	0.6	0.59	0.61	0.61	0.57	0.56	0.56	0.56	0.56	0.57	0.58	0.59	0.58	0.58	0.58	0.58	0.58	0.57	0.58	0.58	0.57	0.59	0.58	0.58
Sphingomonas olei NM83	0.53	0.57	0.55	0.56	0.56	0.55	0.54	0.55	0.55	0.56	0.55	0.55	0.55	0.56	0.56	0.56	0.56	0.56	0.55	0.55	0.55	0.55	0.56	0.59	0.6	0.6	0.58	0.61	0.61	0.57	0.56	0.56	0.56	0.56	0.56	0.58	0.58	0.58	0.57	0.58	0.58	0.58	0.57	0.58	0.57	0.57	0.58	0.57	0.58
Sphingomonas mucosissima DSM 17494	0.53	0.56	0.55	0.56	0.56	0.54	0.54	0.54	0.54	0.56	0.55	0.55	0.55	0.56	0.56	0.56	0.56	0.56	0.54	0.54	0.55	0.55	0.55	0.59	0.6	0.59	0.59	0.6	0.6	0.57	0.56	0.56	0.55	0.55	0.56	0.58	0.58	0.58	0.57	0.57	0.58	0.57	0.57	0.58	0.57	0.56	0.58	0.57	0.57
Sphingomonas dokdonensis DSM 21029	0.52	0.56	0.55	0.56	0.56	0.54	0.54	0.54	0.54	0.56	0.54	0.55	0.55	0.56	0.56	0.55	0.56	0.56	0.54	0.54	0.55	0.54	0.55	0.59	0.6	0.59	0.58	0.6	0.6	0.57	0.56	0.56	0.55	0.56	0.56	0.58	0.58	0.58	0.57	0.58	0.57	0.57	0.57	0.58	0.57	0.56	0.58	0.57	0.57
Sphingomonas corticis 36D10-4-7	0.53	0.56	0.55	0.56	0.56	0.54	0.55	0.54	0.54	0.56	0.55	0.55	0.56	0.56	0.56	0.56	0.56	0.55	0.54	0.54	0.55	0.55	0.55	0.59	0.6	0.59	0.58	0.6	0.6	0.57	0.56	0.56	0.55	0.56	0.56	0.58	0.58	0.58	0.57	0.58	0.58	0.57	0.57	0.58	0.58	0.57	0.58	0.57	0.57
Sphingomonas palmae JS21-1	0.52	0.56	0.55	0.55	0.55	0.55	0.55	0.54	0.54	0.56	0.55	0.55	0.55	0.55	0.56	0.56	0.56	0.55	0.54	0.54	0.55	0.55	0.55	0.59	0.6	0.59	0.58	0.6	0.6	0.57	0.55	0.56	0.55	0.55	0.56	0.58	0.58	0.58	0.57	0.59	0.58	0.57	0.57	0.58	0.57	0.57	0.58	0.57	0.57
Sphingomonas hominis HHU CXW	0.52	0.57	0.55	0.55	0.55	0.54	0.54	0.54	0.54	0.56	0.55	0.55	0.55	0.55	0.56	0.55	0.56	0.56	0.54	0.54	0.55	0.55	0.55	0.59	0.6	0.59	0.58	0.59	0.6	0.56	0.55	0.55	0.55	0.55	0.56	0.57	0.57	0.58	0.57	0.58	0.57	0.57	0.56	0.57	0.57	0.56	0.58	0.57	0.57
Sphingomonas citricola RHCKR47	0.52	0.56	0.55	0.55	0.55	0.55	0.54	0.54	0.54	0.56	0.55	0.55	0.55	0.56	0.56	0.56	0.56	0.55	0.54	0.54	0.55	0.55	0.55	0.59	0.6	0.59	0.58	0.59	0.6	0.57	0.56	0.55	0.55	0.55	0.56	0.58	0.57	0.58	0.57	0.59	0.57	0.57	0.57	0.58	0.57	0.57	0.58	0.57	0.57
Sphingomonas ginsenosidimutans KACC 14949	0.52	0.56	0.55	0.56	0.55	0.55	0.55	0.54	0.55	0.56	0.55	0.55	0.55	0.56	0.56	0.56	0.56	0.56	0.54	0.54	0.56	0.55	0.56	0.59	0.6	0.59	0.57	0.6	0.6	0.57	0.56	0.56	0.56	0.56	0.56	0.58	0.58	0.58	0.57	0.57	0.57	0.57	0.57	0.58	0.57	0.57	0.58	0.57	0.57
Sphingomonas adhaesiva DSM 7418	0.53	0.56	0.55	0.56	0.56	0.55	0.55	0.55	0.55	0.56	0.55	0.56	0.55	0.56	0.56	0.55	0.56	0.56	0.54	0.55	0.56	0.55	0.56	0.59	0.6	0.59	0.58	0.6	0.61	0.57	0.56	0.56	0.56	0.56	0.56	0.58	0.58	0.58	0.57	0.58	0.57	0.57	0.57	0.58	0.57	0.57	0.58	0.57	0.57
Sphingomonas phyllosphaerae FA2	0.53	0.56	0.54	0.55	0.55	0.55	0.54	0.55	0.54	0.55	0.55	0.55	0.55	0.55	0.56	0.55	0.55	0.55	0.54	0.54	0.55	0.54	0.55	0.59	0.59	0.59	0.59	0.6	0.6	0.57	0.56	0.55	0.55	0.55	0.56	0.58	0.57	0.58	0.57	0.57	0.57	0.57	0.56	0.57	0.57	0.57	0.58	0.57	0.57
Sphingomonas endophytica DSM 101535	0.53	0.56	0.55	0.55	0.56	0.55	0.54	0.55	0.55	0.55	0.55	0.55	0.55	0.56	0.56	0.55	0.56	0.55	0.54	0.54	0.55	0.54	0.55	0.59	0.59	0.59	0.59	0.59	0.6	0.57	0.55	0.55	0.55	0.55	0.56	0.58	0.57	0.58	0.57	0.58	0.57	0.58	0.57	0.58	0.58	0.57	0.58	0.57	0.57
Sphingomonas citri RRHST34	0.53	0.56	0.55	0.55	0.55	0.54	0.54	0.54	0.54	0.55	0.55	0.55	0.55	0.55	0.55	0.55	0.55	0.55	0.54	0.54	0.55	0.54	0.55	0.59	0.6	0.59	0.58	0.59	0.6	0.57	0.56	0.55	0.55	0.56	0.56	0.58	0.58	0.57	0.57	0.59	0.57	0.57	0.57	0.58	0.58	0.57	0.58	0.57	0.57
Sphingomonas folli RHCKR7	0.53	0.56	0.55	0.55	0.55	0.55	0.55	0.54	0.54	0.55	0.55	0.55	0.55	0.55	0.56	0.56	0.55	0.55	0.54	0.54	0.55	0.54	0.55	0.59	0.6	0.59	0.58	0.59	0.6	0.57	0.55	0.55	0.55	0.55	0.56	0.58	0.57	0.58	0.57	0.58	0.57	0.57	0.57	0.58	0.57	0.57	0.58	0.57	0.57
Sphingomonas yunnanensis CCTCC-AB-204064	0.53	0.56	0.55	0.55	0.55	0.54	0.55	0.54	0.54	0.55	0.55	0.55	0.55	0.55	0.56	0.56	0.55	0.55	0.54	0.54	0.55	0.54	0.55	0.59	0.6	0.59	0.58	0.59	0.6	0.57	0.55	0.55	0.55	0.55	0.56	0.58	0.57	0.58	0.57	0.58	0.57	0.57	0.57	0.58	0.57	0.56	0.58	0.57	0.57
Sphingomonas lenta 1PNM-20	0.53	0.56	0.55	0.55	0.55	0.54	0.55	0.54	0.54	0.56	0.54	0.55	0.56	0.56	0.56	0.56	0.55	0.55	0.55	0.54	0.55	0.55	0.55	0.6	0.6	0.6	0.58	0.6	0.61	0.57	0.56	0.56	0.56	0.56	0.56	0.58	0.58	0.58	0.57	0.58	0.58	0.57	0.57	0.58	0.57	0.57	0.59	0.57	0.58
Sphingomonas jinjuensis YC6723	0.53	0.56	0.55	0.55	0.56	0.54	0.54	0.54	0.54	0.56	0.55	0.55	0.56	0.56	0.56	0.56	0.56	0.55	0.54	0.54	0.56	0.55	0.55	0.59	0.6	0.59	0.58	0.6	0.6	0.57	0.56	0.56	0.55	0.56	0.56	0.58	0.58	0.58	0.58	0.58	0.58	0.58	0.57	0.58	0.57	0.57	0.58	0.57	0.58
Sphingomonas aerophila DSM 100044	0.53	0.56	0.54	0.55	0.54	0.54	0.54	0.54	0.53	0.55	0.54	0.55	0.55	0.55	0.55	0.55	0.55	0.55	0.53	0.53	0.55	0.54	0.55	0.59	0.59	0.58	0.59	0.59	0.6	0.56	0.55	0.55	0.54	0.55	0.56	0.58	0.57	0.57	0.57	0.58	0.57	0.57	0.56	0.57	0.57	0.57	0.58	0.57	0.57
Sphingomonas gellani S6-262	0.52	0.55	0.54	0.55	0.54	0.54	0.54	0.54	0.54	0.55	0.55	0.55	0.55	0.55	0.55	0.55	0.55	0.55	0.53	0.54	0.55	0.54	0.55	0.58	0.59	0.58	0.58	0.59	0.59	0.56	0.55	0.55	0.55	0.55	0.55	0.57	0.57	0.57	0.57	0.58	0.57	0.57	0.56	0.57	0.57	0.56	0.57	0.57	0.57
Sphingomonas aquatilis NBRC 16722	0.53	0.56	0.55	0.56	0.56	0.54	0.54	0.54	0.54	0.56	0.55	0.55	0.55	0.56	0.56	0.55	0.56	0.56	0.54	0.54	0.55	0.55	0.55	0.59	0.6	0.59	0.58	0.6	0.6	0.57	0.56	0.56	0.56	0.56	0.57	0.58	0.58	0.58	0.57	0.58	0.57	0.57	0.57	0.58	0.57	0.57	0.58	0.57	0.57
Sphingomonas melonis DAPP-PG 224	0.53	0.56	0.55	0.56	0.56	0.54	0.54	0.54	0.54	0.56	0.55	0.55	0.55	0.56	0.56	0.55	0.56	0.55	0.54	0.54	0.55	0.55	0.55	0.59	0.59	0.59	0.58	0.6	0.6	0.57	0.56	0.56	0.55	0.56	0.56	0.58	0.58	0.58	0.57	0.58	0.57	0.57	0.57	0.58	0.57	0.57	0.58	0.57	0.57
Sphingomonas kyungheensis LMG 26582	0.53	0.56	0.55	0.55	0.55	0.54	0.54	0.54	0.54	0.56	0.56	0.55	0.55	0.55	0.55	0.55	0.56	0.55	0.54	0.54	0.55	0.55	0.55	0.59	0.6	0.59	0.59	0.6	0.6	0.57	0.56	0.56	0.55	0.56	0.56	0.58	0.58	0.58	0.57	0.59	0.57	0.57	0.57	0.58	0.58	0.57	0.58	0.57	0.57
Sphingomonas insulae KCTC 12872	0.53	0.56	0.55	0.56	0.56	0.55	0.54	0.54	0.54	0.55	0.55	0.55	0.55	0.56	0.56	0.56	0.56	0.55	0.54	0.54	0.55	0.54	0.55	0.59	0.6	0.59	0.58	0.59	0.6	0.57	0.56	0.55	0.55	0.56	0.56	0.57	0.57	0.57	0.57	0.58	0.57	0.57	0.57	0.57	0.57	0.56	0.58	0.57	0.57
Sphingomonas oligophenolica S5_1	0.52	0.57	0.55	0.55	0.56	0.55	0.54	0.54	0.54	0.56	0.55	0.55	0.56	0.56	0.56	0.56	0.56	0.56	0.54	0.54	0.55	0.55	0.56	0.59	0.6	0.59	0.58	0.6	0.6	0.57	0.56	0.56	0.56	0.56	0.56	0.58	0.58	0.58	0.57	0.58	0.57	0.57	0.57	0.58	0.57	0.57	0.58	0.57	0.57
Sphingomonas aerolata NW12	0.53	0.56	0.54	0.55	0.56	0.55	0.54	0.54	0.54	0.56	0.56	0.55	0.56	0.56	0.56	0.56	0.56	0.56	0.54	0.54	0.55	0.54	0.55	0.59	0.6	0.59	0.58	0.6	0.6	0.57	0.55	0.56	0.55	0.56	0.56	0.58	0.57	0.58	0.57	0.58	0.57	0.57	0.57	0.58	0.57	0.56	0.58	0.57	0.57
Sphingomonas aurantiaca MA101b	0.52	0.56	0.54	0.55	0.55	0.54	0.54	0.54	0.54	0.55	0.56	0.55	0.55	0.56	0.56	0.55	0.56	0.56	0.54	0.54	0.55	0.54	0.55	0.59	0.6	0.59	0.58	0.59	0.6	0.57	0.55	0.55	0.55	0.55	0.56	0.57	0.57	0.58	0.57	0.58	0.57	0.57	0.56	0.57	0.57	0.56	0.57	0.57	0.57
Sphingomonas albertensis DOAB 1063	0.53	0.56	0.54	0.55	0.55	0.54	0.54	0.54	0.54	0.55	0.55	0.55	0.55	0.55	0.55	0.55	0.56	0.55	0.54	0.54	0.55	0.54	0.55	0.58	0.6	0.59	0.58	0.6	0.6	0.57	0.55	0.55	0.55	0.55	0.56	0.57	0.57	0.57	0.57	0.57	0.57	0.56	0.56	0.57	0.57	0.56	0.58	0.57	0.57
Sphingomonas faeni MA-olki	0.52	0.56	0.54	0.55	0.55	0.54	0.53	0.53	0.54	0.55	0.55	0.55	0.55	0.55	0.55	0.55	0.56	0.55	0.54	0.53	0.55	0.54	0.55	0.58	0.59	0.58	0.58	0.59	0.59	0.57	0.55	0.55	0.55	0.55	0.56	0.57	0.57	0.57	0.57	0.58	0.57	0.57	0.56	0.57	0.57	0.56	0.57	0.57	0.57
Sphingomonas metalli CGMCC 1.15330	0.53	0.56	0.55	0.55	0.55	0.54	0.54	0.55	0.54	0.55	0.56	0.55	0.56	0.56	0.56	0.56	0.55	0.55	0.54	0.54	0.55	0.55	0.55	0.59	0.6	0.6	0.58	0.6	0.6	0.57	0.55	0.56	0.55	0.56	0.56	0.58	0.58	0.58	0.57	0.59	0.57	0.58	0.57	0.58	0.58	0.57	0.58	0.57	0.58
Sphingomonas abaci DSM 15867	0.53	0.56	0.55	0.55	0.55	0.54	0.54	0.54	0.54	0.55	0.55	0.55	0.55	0.55	0.55	0.55	0.55	0.55	0.54	0.54	0.55	0.54	0.55		0.6	0.59	0.58	0.6		0.56	0.55	0.55	0.55	0.55	0.56	0.58	0.58	0.58	0.57	0.59	0.57	0.57	0.57	0.58	0.58	0.57	0.58	0.57	0.57
Sphingomonas rubra CGMCC 1.9113	0.53	0.57	0.55	0.56	0.56	0.55	0.55	0.54	0.54	0.56	0.55	0.56	0.56	0.56	0.56	0.56	0.56	0.56	0.55	0.55	0.56	0.55	0.56	0.59	0.6	0.6	0.59	0.6	0.6	0.57	0.56	0.56	0.56	0.56	0.57	0.59	0.58	0.58	0.58	0.59	0.58	0.58	0.58	0.58	0.57	0.57	0.59	0.58	0.58
Sphingomonas carotinifaciens DSM 27347	0.53	0.56	0.55	0.55	0.56	0.54	0.54	0.54	0.54	0.56	0.55	0.55	0.55	0.56	0.56	0.56	0.56	0.56	0.54	0.54	0.55	0.54	0.55	0.59	0.6	0.59	0.59	0.6	0.61	0.57	0.56	0.56	0.55	0.56	0.56	0.58	0.58	0.58	0.57	0.59	0.57	0.57	0.57	0.58	0.58	0.57	0.58	0.57	0.57
Sphingomonas paucimobilis NCTC11030	0.53	0.56	0.54	0.55	0.55	0.54	0.53	0.53	0.54	0.55	0.54	0.54	0.54	0.55	0.55	0.55	0.55	0.55	0.54	0.54	0.55	0.54	0.55	0.58	0.59	0.59	0.58	0.59	0.6	0.57	0.55	0.55	0.55	0.55	0.56	0.57	0.57	0.58	0.57	0.58	0.57	0.56	0.56	0.57	0.57	0.56	0.58	0.57	0.57
Sphingomonas pseudosanguinis DSM 19512	0.53	0.56	0.54	0.55	0.56	0.55	0.54	0.54	0.54	0.55	0.54	0.55	0.55	0.55	0.55	0.55	0.55	0.55	0.54	0.54	0.55	0.54	0.55	0.59	0.6	0.59	0.58	0.6	0.6	0.57	0.56	0.56	0.55	0.55	0.56	0.58	0.57	0.58	0.57	0.58	0.57	0.57	0.56	0.57	0.57	0.57	0.58	0.57	0.57
Sphingomonas zeae CCM 8596	0.53	0.56	0.54	0.55	0.56	0.54	0.54	0.54	0.54	0.55	0.54	0.55	0.55	0.55	0.55	0.55	0.55	0.55	0.53	0.54	0.55	0.54	0.55	0.58	0.59	0.59	0.58	0.59	0.6	0.56	0.55	0.55	0.55	0.55	0.56	0.57	0.57	0.58	0.57	0.58	0.57	0.57	0.56	0.57	0.57	0.56	0.58	0.56	0.57
Sphingomonas sanguinis NBRC 13937	0.53	0.56	0.54	0.55	0.55	0.54	0.53	0.54	0.54	0.55	0.55	0.55	0.54	0.55	0.55	0.55	0.55	0.55	0.53	0.54	0.54	0.54	0.55	0.58	0.59	0.59	0.58	0.59	0.6	0.56	0.55	0.55	0.55	0.55	0.56	0.57	0.57	0.57	0.57	0.58	0.57	0.57	0.56	0.57	0.57	0.56	0.58	0.57	0.57
Sphingomonas parapaucimobilis NBRC 15100	0.53	0.56	0.54	0.55	0.55	0.54	0.54	0.54	0.54	0.55	0.54	0.55	0.55	0.55	0.55	0.55	0.55	0.55	0.53	0.54	0.55	0.54	0.55	0.59	0.6	0.59	0.58	0.59	0.6	0.57	0.55	0.55	0.55	0.55	0.56	0.58	0.57	0.58	0.57	0.58	0.57	0.57	0.56	0.57	0.57	0.56	0.58	0.57	0.57
Sphingomonas yabuuchiae DSM 14562	0.52	0.56	0.54	0.55	0.55	0.54	0.54	0.54	0.53	0.55	0.55	0.54	0.55	0.55	0.55	0.55	0.55	0.55	0.53	0.53	0.55	0.54	0.55	0.58	0.59	0.59	0.57	0.6	0.6	0.57	0.55	0.56	0.55	0.55	0.56	0.57	0.57	0.58	0.57	0.58	0.57	0.57	0.56	0.57	0.57	0.56	0.58	0.57	0.57
Sphingomonas paeninsulae YZ-8	0.53	0.56	0.54	0.55	0.55	0.54	0.54	0.53	0.54	0.55	0.55	0.55	0.55	0.55	0.56	0.55	0.55	0.55	0.54	0.54	0.55	0.54	0.55	0.58	0.59	0.59	0.57	0.6	0.6	0.57	0.55	0.55	0.55	0.55	0.56	0.57	0.57	0.58	0.56	0.56	0.56	0.56	0.56	0.57	0.56	0.56	0.58	0.57	0.57
Aquisediminimonas sediminicola CH68-4	0.53	0.56	0.54	0.56	0.56	0.55	0.55	0.54	0.54	0.57	0.54	0.55	0.55	0.55	0.56	0.55	0.55	0.55	0.54	0.55	0.56	0.55	0.55	0.58	0.6	0.6	0.57	0.6	0.6	0.57	0.56	0.56	0.56	0.55	0.56	0.57	0.57	0.57	0.57	0.56	0.57	0.56	0.56	0.57	0.57	0.56	0.58	0.56	0.56
Aquisediminimonas profunda DS48-3	0.52	0.56	0.54	0.56	0.56	0.55	0.55	0.54	0.54	0.57	0.55	0.55	0.55	0.56	0.56	0.56	0.56	0.55	0.54	0.55	0.56	0.56	0.56	0.59	0.6	0.6	0.57	0.61	0.61	0.57	0.56	0.56	0.55	0.56	0.56	0.58	0.58	0.58	0.58	0.57	0.57	0.57	0.57	0.58	0.57	0.57	0.58	0.57	0.58
Chakrabartia godavariana PRB40	0.53	0.57	0.54	0.56	0.56	0.55	0.55	0.54	0.55	0.57	0.55	0.55	0.55	0.56	0.56	0.56	0.56	0.55	0.54	0.55	0.56	0.56	0.56	0.59	0.6	0.6	0.58	0.61	0.61	0.58	0.57	0.56	0.56	0.56	0.57	0.58	0.58	0.58	0.58	0.58	0.58	0.57	0.57	0.58	0.58	0.57	0.59	0.58	0.58
Parasphingopyxis marina GrpM-11	0.52	0.55	0.55	0.55	0.55	0.53	0.54	0.53	0.53	0.54	0.53	0.53	0.54	0.55	0.55	0.55	0.54	0.54	0.53	0.53	0.54	0.54	0.54	0.59	0.6	0.61	0.57	0.6	0.61	0.58	0.56	0.56	0.56	0.56	0.57	0.57	0.57	0.57	0.57	0.56	0.57	0.56	0.56	0.57	0.57	0.56	0.58	0.57	0.57
Parasphingopyxis algicola JCM 31719	0.52	0.55	0.55	0.55	0.55	0.55	0.54	0.53	0.53	0.55	0.53	0.54	0.55	0.55	0.55	0.55	0.54	0.54	0.53	0.54	0.55	0.54	0.54	0.58	0.6	0.6	0.57	0.6	0.6	0.58	0.56	0.57	0.56	0.57	0.57	0.57	0.56	0.57	0.57	0.56	0.57	0.55	0.56	0.57	0.55	0.56	0.57	0.56	0.57
Parasphingopyxis lamellibrachiae DSM 26725	0.52	0.55	0.55	0.56	0.56	0.54	0.54	0.53	0.53	0.55	0.53	0.54	0.54	0.55	0.55	0.55	0.54	0.55	0.53	0.54	0.54	0.54	0.54	0.59	0.6	0.6	0.57	0.6	0.61	0.57	0.56	0.56	0.56	0.56	0.57	0.57	0.57	0.58	0.57	0.56	0.57	0.56	0.56	0.57	0.56	0.56	0.57	0.56	0.57
Rhizorhapis suberifaciens DSM 7465	0.53	0.56	0.54	0.56	0.56	0.54	0.54	0.54	0.54	0.55	0.54	0.54	0.55	0.55	0.56	0.55	0.55	0.55	0.54	0.53	0.55	0.54	0.55	0.59	0.6	0.61	0.58	0.61	0.61	0.57	0.56	0.56	0.55	0.56	0.56	0.57	0.57	0.58	0.57	0.57	0.57	0.56	0.56	0.57	0.57	0.56	0.58	0.57	0.57
Sphingobium sufflavum HL-25	0.52	0.55	0.53	0.54	0.54	0.53	0.53	0.53	0.53	0.54	0.53	0.53	0.54	0.54	0.55	0.54	0.54	0.54	0.52	0.53	0.54	0.53	0.54	0.57	0.58	0.57	0.56	0.58	0.59	0.56	0.55	0.54	0.54	0.55	0.55	0.56	0.56	0.56	0.55	0.55	0.55	0.55	0.55	0.56	0.56	0.55	0.57	0.56	0.56
Sphingobium lignivorans B1D3A	0.53	0.55	0.54	0.55	0.55	0.54	0.54	0.54	0.54	0.55	0.53	0.53	0.54	0.54	0.55	0.54	0.55	0.54	0.53	0.53	0.54	0.54	0.54	0.57	0.59	0.58	0.56	0.59	0.59	0.56	0.55	0.55	0.54	0.55	0.55	0.56	0.56	0.57	0.56	0.56	0.56	0.55	0.56	0.56	0.56	0.55	0.57	0.56	0.56
Sphingobium xanthum NL9	0.52	0.55	0.54	0.54	0.55	0.53	0.53	0.53	0.53	0.54	0.52	0.53	0.54	0.54	0.54	0.54	0.55	0.54	0.53	0.53	0.54	0.54	0.54	0.57	0.58	0.58	0.55	0.58	0.59	0.55	0.55	0.54	0.54	0.54	0.55	0.56	0.56	0.57	0.56	0.55	0.55	0.55	0.55	0.56	0.56	0.55	0.57	0.56	0.56
Sphingobium subterraneum DSM 102255	0.53	0.56	0.54	0.55	0.56	0.54	0.54	0.54	0.54	0.55	0.54	0.55	0.55	0.55	0.56	0.55	0.55	0.55	0.54	0.54	0.55	0.55	0.55	0.58	0.59	0.59	0.57	0.6	0.6	0.57	0.56	0.55	0.55	0.55	0.56	0.57	0.57	0.57	0.57	0.57	0.57	0.56	0.56	0.57	0.56	0.56	0.57	0.57	0.56
Sphingobium fluviale CHR27	0.53	0.55	0.54	0.56	0.56	0.54	0.54	0.55	0.55	0.55	0.53	0.54	0.54	0.54	0.55	0.55	0.54	0.54	0.53	0.54	0.55	0.55	0.55	0.58	0.59	0.59	0.56	0.59	0.59	0.57	0.55	0.56	0.55	0.55	0.56	0.56	0.57	0.57	0.56	0.56	0.56	0.56	0.56	0.56	0.56	0.55	0.57	0.57	0.56
Sphingobium jiangsuense NBRC 112973	0.53	0.55	0.54	0.55	0.56	0.54	0.54	0.55	0.54	0.54	0.53	0.54	0.54	0.54	0.55	0.55	0.54	0.54	0.53	0.54	0.54	0.54	0.54	0.58	0.58	0.59	0.57	0.59	0.59	0.57	0.56	0.55	0.55	0.55	0.56	0.57	0.57	0.57	0.56	0.56	0.56	0.56	0.56	0.57	0.56	0.55	0.57	0.56	0.56
Sphingobium algorifonticola TLA-22	0.53	0.56	0.54	0.56	0.57	0.55	0.55	0.53	0.54	0.56	0.55	0.55	0.56	0.56	0.56	0.56	0.56	0.55	0.55	0.55	0.56	0.55	0.56	0.58	0.6	0.6	0.57	0.6	0.61	0.57	0.56	0.56	0.55	0.55	0.56	0.57	0.57	0.58	0.58	0.57	0.57	0.56	0.57	0.57	0.57	0.56	0.58	0.57	0.57
Sphingobium phenoxybenzoativorans SC_3	0.53	0.55	0.54	0.55	0.56	0.54	0.54	0.55	0.55	0.55	0.53	0.55	0.54	0.55	0.54	0.54	0.54	0.54	0.53	0.54	0.54	0.54	0.54	0.58	0.6	0.59	0.57	0.6	0.6	0.57	0.56	0.55	0.55	0.55	0.56	0.57	0.57	0.57	0.57	0.56	0.56	0.56	0.56	0.56	0.56	0.56	0.57	0.57	0.57
Sphingobium aquiterrae DSM 106441	0.53	0.56	0.54	0.56	0.56	0.54	0.54	0.56	0.55	0.55	0.54	0.54	0.54	0.55	0.55	0.55	0.55	0.55	0.54	0.54	0.55	0.54	0.55	0.58	0.59	0.59	0.57	0.6	0.6	0.57	0.55	0.55	0.55	0.55	0.56	0.57	0.57	0.57	0.56	0.57	0.56	0.56	0.56	0.57	0.56	0.55	0.58	0.56	0.56
Sphingobium aromaticiconvertens DSM12677complete	0.53	0.56	0.54	0.55	0.55	0.53	0.53	0.56	0.54	0.55	0.53	0.54	0.54	0.54	0.55	0.54	0.55	0.55	0.53	0.53	0.54	0.54	0.54	0.58	0.59	0.59	0.57	0.6	0.6	0.56	0.55	0.54	0.54	0.55	0.55	0.56	0.57	0.57	0.56	0.56	0.56	0.56	0.55	0.56	0.56	0.55	0.57	0.56	0.56
Sphingobium fontiphilum DSM 29348	0.53	0.56	0.55	0.56	0.56	0.54	0.54	0.55	0.54	0.56	0.54	0.54	0.55	0.55	0.55	0.55	0.55	0.55	0.54	0.54	0.55	0.55	0.55	0.59	0.6	0.59	0.57	0.6	0.6	0.57	0.56	0.56	0.55	0.56	0.56	0.57	0.57	0.58	0.57	0.57	0.57	0.56	0.56	0.57	0.57	0.56	0.57	0.57	0.57
Sphingobium naphthae FXH-27	0.54	0.56	0.55	0.55	0.56	0.54	0.54	0.54	0.54	0.55	0.54	0.54	0.55	0.55	0.56	0.55	0.55	0.55	0.54	0.54	0.55	0.55	0.55	0.59	0.6	0.59	0.58	0.6	0.6	0.57	0.56	0.55	0.55	0.55	0.56	0.57	0.57	0.58	0.57	0.57	0.57	0.56	0.56	0.57	0.57	0.56	0.58	0.57	0.57
Sphingobium lactosutens DS20	0.53	0.55	0.54	0.55	0.56	0.54	0.53	0.55	0.55	0.55	0.53	0.54	0.54	0.54	0.55	0.54	0.54	0.54	0.53	0.54	0.54	0.54	0.54	0.58	0.59	0.59	0.57	0.6	0.6	0.56	0.55	0.55	0.55	0.55	0.56	0.57	0.56	0.57	0.57	0.57	0.56	0.56	0.56	0.57	0.57	0.55	0.58	0.56	0.56
Sphingobium abikonense NBRC 16140	0.53	0.56	0.54	0.55	0.56	0.54	0.54	0.54	0.54	0.55	0.54	0.55	0.54	0.55	0.55	0.55	0.55	0.55	0.54	0.54	0.55	0.54	0.55	0.59	0.59	0.59	0.58	0.6	0.6	0.57	0.56	0.56	0.55	0.55	0.56	0.57	0.57	0.58	0.57	0.57	0.57	0.56	0.56	0.57	0.57	0.56	0.58	0.57	0.57
Sphingobium olei DSM 18999 contigs	0.53	0.56	0.54	0.55	0.56	0.54	0.54	0.54	0.54	0.55	0.53	0.54	0.54	0.54	0.55	0.54	0.55	0.55	0.53	0.54	0.55	0.54	0.55	0.59	0.59	0.59	0.58	0.6	0.6	0.56	0.55	0.55	0.54	0.55	0.55	0.57	0.57	0.57	0.57	0.57	0.56	0.56	0.56	0.57	0.57	0.56	0.57	0.56	0.56
Sphingobium amiense DSM 16289	0.53	0.55	0.54	0.56	0.56	0.54	0.54	0.56	0.55	0.55	0.54	0.54	0.55	0.54	0.55	0.54	0.54	0.54	0.53	0.54	0.54	0.54	0.55	0.58	0.59	0.59	0.57	0.6	0.6	0.56	0.55	0.55	0.55	0.55	0.55	0.57	0.57	0.58	0.56	0.56	0.56	0.56	0.56	0.56	0.57	0.56	0.57	0.56	0.56
Sphingobium rhizovicinum CCM 7491	0.53	0.55	0.54	0.55	0.55	0.53	0.53	0.54	0.53	0.54	0.53	0.53	0.54	0.54	0.54	0.54	0.55	0.54	0.53	0.53	0.54	0.53	0.54	0.58	0.59	0.58	0.57	0.59	0.59	0.56	0.55	0.55	0.54	0.54	0.55	0.56	0.56	0.57	0.56	0.56	0.56	0.55	0.55	0.56	0.56	0.55	0.57	0.56	0.56
Sphingobium scionense ICMP 13533	0.53	0.55	0.54	0.55	0.55	0.54	0.53	0.56	0.54	0.55	0.53	0.54	0.54	0.54	0.54	0.54	0.54	0.54	0.53	0.53	0.54	0.53	0.54	0.57	0.59	0.59	0.57	0.59	0.59	0.56	0.55	0.55	0.54	0.55	0.55	0.57	0.56	0.57	0.56	0.56	0.55	0.56	0.55	0.56	0.56	0.55	0.57	0.56	0.56
Sphingobium yanoikuyae ATCC 51230	0.53	0.56	0.54	0.55	0.55	0.53	0.53	0.55	0.54	0.54	0.53	0.54	0.54	0.54	0.55	0.54	0.55	0.55	0.53	0.53	0.54	0.54	0.54	0.58	0.59	0.59	0.57	0.6	0.59	0.57	0.55	0.55	0.55	0.55	0.56	0.57	0.56	0.57	0.56	0.56	0.56	0.55	0.56	0.56	0.56	0.55	0.57	0.56	0.57
Sphingobium limneticum DSM 25076	0.53	0.55	0.54	0.55	0.55	0.53	0.53	0.54	0.54	0.54	0.53	0.54	0.54	0.54	0.54	0.54	0.54	0.54	0.53	0.53	0.54	0.53	0.54	0.58	0.59	0.58	0.57	0.59	0.59	0.56	0.55	0.55	0.54	0.55	0.55	0.56	0.56	0.57	0.56	0.56	0.56	0.55	0.55	0.56	0.56	0.55	0.57	0.56	0.56
Sphingobium cupriresistens CCTCC AB 2011146	0.53	0.55	0.54	0.55	0.55	0.54	0.53	0.54	0.55	0.55	0.53	0.54	0.55	0.54	0.54	0.54	0.54	0.54	0.53	0.53	0.54	0.54	0.54	0.58	0.59	0.59	0.57	0.59	0.59	0.56	0.55	0.55	0.55	0.55	0.56	0.57	0.57	0.57	0.56	0.56	0.56	0.55	0.56	0.56	0.57	0.56	0.57	0.56	0.56
Sphingobium psychrophilum AR-3-1	0.53	0.55	0.54	0.54	0.55	0.53	0.53	0.54	0.54	0.54	0.53	0.53	0.54	0.54	0.54	0.54	0.54	0.54	0.53	0.53	0.54	0.54	0.54	0.57	0.58	0.58	0.57	0.59	0.59	0.56	0.55	0.55	0.54	0.55	0.55	0.57	0.56	0.57	0.56	0.56	0.56	0.55	0.55	0.56	0.56	0.55	0.57	0.56	0.56
Sphingobium terrigena EO9	0.53	0.55	0.54	0.55	0.55	0.53	0.53	0.54	0.53	0.55	0.53	0.54	0.54	0.54	0.55	0.54	0.55	0.55	0.53	0.53	0.54	0.54	0.55	0.57	0.59	0.59	0.57	0.59	0.6	0.56	0.55	0.55	0.54	0.55	0.55	0.57	0.56	0.57	0.56	0.56	0.56	0.55	0.56	0.56	0.56	0.55	0.57	0.56	0.56
Sphingobium xenophagum NBRC 107872	0.53	0.55	0.54	0.55	0.55	0.53	0.53	0.54	0.54	0.55	0.53	0.54	0.54	0.54	0.55	0.54	0.54	0.54	0.53	0.54	0.54	0.54	0.55	0.58	0.59	0.59	0.56	0.6	0.6	0.56	0.56	0.55	0.55	0.55	0.56	0.57	0.57	0.57	0.56	0.56	0.56	0.56	0.56	0.57	0.56	0.56	0.57	0.56	0.56
Sphingobium ummariense RL-3	0.54	0.56	0.55	0.56	0.56	0.54	0.54	0.55	0.55	0.55	0.54	0.54	0.54	0.55	0.55	0.54	0.55	0.55	0.53	0.54	0.55	0.55	0.55	0.59	0.6	0.6	0.58	0.6	0.6	0.57	0.55	0.56	0.55	0.55	0.56	0.58	0.57	0.58	0.57	0.57	0.57	0.56	0.56	0.57	0.57	0.56	0.58	0.57	0.57
Sphingobium cloacae JCM 10874	0.53	0.56	0.54	0.56	0.56	0.54	0.54	0.57	0.55	0.55	0.53	0.54	0.54	0.54	0.55	0.54	0.54	0.54	0.53	0.54	0.55	0.54	0.55	0.59	0.59	0.6	0.56	0.6	0.6	0.57	0.56	0.55	0.55	0.55	0.56	0.57	0.57	0.58	0.57	0.56	0.56	0.56	0.56	0.57	0.56	0.56	0.58	0.56	0.57
Sphingobium faniae CGMCC 1.7749	0.53	0.55	0.54	0.55	0.56	0.54	0.53	0.57	0.54	0.55	0.52	0.54	0.54	0.54	0.54	0.53	0.54	0.54	0.53	0.54	0.54	0.54	0.54	0.58	0.59	0.59	0.56	0.6	0.59	0.56	0.55	0.55	0.55	0.55	0.56	0.57	0.56	0.57	0.56	0.56	0.56	0.55	0.55	0.56	0.56	0.55	0.57	0.56	0.56
Sphingobium wenxiniae CGMCC 1.7748	0.53	0.56	0.55	0.56	0.56	0.54	0.53	0.54	0.54	0.55	0.53	0.54	0.54	0.54	0.55	0.54	0.54	0.54	0.53	0.54	0.55	0.54	0.54	0.58	0.6	0.59	0.57	0.6	0.6	0.57	0.56	0.56	0.55	0.55	0.56	0.57	0.57	0.58	0.56	0.56	0.56	0.56	0.56	0.57	0.56	0.56	0.58	0.56	0.56
Sphingobium baderi LL03	0.53	0.55	0.54	0.56	0.56	0.53	0.53	0.55	0.54	0.55	0.53	0.54	0.54	0.54	0.55	0.54	0.54	0.54	0.53	0.54	0.55	0.54	0.54	0.58	0.59	0.59	0.57	0.6	0.6	0.56	0.55	0.55	0.55	0.55	0.56	0.57	0.57	0.57	0.56	0.56	0.56	0.56	0.55	0.56	0.56	0.56	0.57	0.56	0.56
Sphingobium vermicomposti DSM 21299	0.53	0.56	0.54	0.55	0.55	0.53	0.54	0.54	0.54	0.55	0.53	0.54	0.54	0.55	0.55	0.55	0.55	0.54	0.53	0.53	0.55	0.54	0.55	0.58	0.6	0.6	0.57	0.6	0.6	0.57	0.56	0.55	0.55	0.55	0.56	0.57	0.56	0.57	0.56	0.56	0.56	0.55	0.56	0.56	0.57	0.56	0.57	0.56	0.57
Sphingobium quisquiliarum P25	0.53	0.56	0.55	0.56	0.56	0.54	0.54	0.55	0.55	0.55	0.54	0.54	0.55	0.55	0.55	0.55	0.55	0.54	0.53	0.54	0.55	0.54	0.55	0.58	0.6	0.59	0.58	0.6	0.6	0.57	0.56	0.55	0.55	0.55	0.56	0.57	0.57	0.58	0.57	0.57	0.57	0.56	0.56	0.57	0.57	0.56	0.58	0.57	0.57
Sphingobium herbicidovorans MH	0.53	0.55	0.54	0.56	0.55	0.53	0.53	0.54	0.54	0.55	0.53	0.54	0.54	0.55	0.55	0.54	0.54	0.54	0.53	0.54	0.55	0.54	0.54	0.58	0.59	0.59	0.57	0.6	0.6	0.56	0.55	0.55	0.55	0.55	0.55	0.57	0.56	0.57	0.56	0.56	0.57	0.55	0.55	0.56	0.56	0.55	0.57	0.56	0.57
Sphingobium mellinum DSM 7458	0.53	0.55	0.54	0.56	0.56	0.54	0.54	0.54	0.54	0.55	0.54	0.54	0.54	0.54	0.55	0.55	0.55	0.54	0.53	0.54	0.54	0.54	0.55	0.59	0.59	0.59	0.57	0.6	0.6	0.57	0.56	0.55	0.55	0.55	0.56	0.57	0.57	0.57	0.56	0.57	0.57	0.56	0.56	0.57	0.57	0.56	0.57	0.57	0.57
Sphingobium bisphenolivorans YL23	0.53	0.56	0.54	0.56	0.55	0.53	0.54	0.54	0.54	0.55	0.53	0.54	0.54	0.55	0.55	0.54	0.55	0.54	0.53	0.53	0.55	0.54	0.55	0.58	0.59	0.59	0.58	0.6	0.6	0.57	0.56	0.55	0.55	0.55	0.56	0.57	0.57	0.57	0.56	0.56	0.56	0.56	0.56	0.56	0.57	0.56	0.57	0.56	0.57
Sphingobium indicum B90A	0.53	0.56	0.54	0.56	0.56	0.54	0.54	0.54	0.54	0.55	0.53	0.54	0.54	0.55	0.55	0.54	0.55	0.55	0.53	0.54	0.55	0.54	0.55	0.58	0.6	0.6	0.58	0.6	0.6	0.57	0.56	0.56	0.55	0.55	0.56	0.57	0.57	0.57	0.56	0.56	0.57	0.56	0.56	0.57	0.57	0.56	0.58	0.57	0.57
Sphingobium fuliginis DSM 18781	0.53	0.55	0.54	0.56	0.55	0.53	0.54	0.55	0.54	0.55	0.53	0.54	0.54	0.55	0.55	0.54	0.55	0.54	0.53	0.54	0.55	0.54	0.54	0.58	0.59	0.6	0.58	0.6	0.6	0.56	0.55	0.55	0.54	0.55	0.56	0.57	0.57	0.57	0.56	0.56	0.57	0.56	0.55	0.57	0.57	0.56	0.58	0.56	0.57
Sphingobium chlorophenolicum NBRC 16172	0.53	0.55	0.54	0.55	0.56	0.53	0.54	0.55	0.55	0.55	0.53	0.54	0.54	0.54	0.55	0.54	0.54	0.54	0.53	0.54	0.55	0.54	0.55	0.58	0.59	0.59	0.57	0.6	0.6	0.57	0.55	0.55	0.55	0.55	0.56	0.57	0.57	0.57	0.56	0.56	0.56	0.55	0.56	0.56	0.57	0.55	0.57	0.56	0.56
Sphingobium estronivorans AXB	0.53	0.56	0.54	0.55	0.55	0.53	0.53	0.54	0.54	0.55	0.53	0.54	0.54	0.55	0.55	0.54	0.54	0.54	0.53	0.53	0.54	0.53	0.54	0.58	0.59	0.59	0.57	0.6	0.6	0.57	0.55	0.55	0.55	0.55	0.56	0.57	0.57	0.57	0.56	0.56	0.56	0.56	0.56	0.57	0.56	0.55	0.57	0.57	0.56
Sphingobium chungbukense DJ77	0.52	0.55	0.54	0.55	0.55	0.53	0.53	0.53	0.54	0.54	0.53	0.53	0.54	0.54	0.54	0.54	0.54	0.54	0.53	0.53	0.54	0.54	0.54	0.58	0.59	0.59	0.56	0.59	0.59	0.56	0.55	0.55	0.55	0.55	0.55	0.57	0.56	0.57	0.56	0.56	0.56	0.55	0.55	0.56	0.56	0.55	0.57	0.56	0.56
Sphingorhabdus soli D-2Q-5-6	0.52	0.56	0.54	0.55	0.55	0.54	0.54	0.53	0.53	0.55	0.54	0.54	0.54	0.55	0.55	0.55	0.55	0.54	0.53	0.54	0.55	0.54	0.55	0.59	0.59	0.59	0.57	0.59	0.6	0.58	0.57	0.56	0.56	0.57	0.57	0.58	0.58	0.58	0.58	0.57	0.57	0.57	0.57	0.57	0.57	0.57	0.58	0.57	0.57
Sphingomonas lacunae CSW-10	0.52	0.56	0.54	0.55	0.55	0.55	0.55	0.54	0.54	0.56	0.53	0.54	0.54	0.55	0.55	0.55	0.55	0.55	0.54	0.55	0.55	0.55	0.55	0.57	0.58	0.58	0.56	0.59	0.59	0.57	0.56	0.56	0.55	0.56	0.57	0.57	0.57	0.58	0.57	0.56	0.57	0.56	0.56	0.57	0.56	0.56	0.57	0.56	0.56
Sphingopyxis granuli NBRC 100800	0.52	0.56	0.54	0.56	0.55	0.54	0.54	0.54	0.55	0.55	0.53	0.54	0.54	0.55	0.55	0.54	0.54	0.55	0.53	0.54	0.55	0.54	0.55	0.58	0.59	0.59	0.56	0.59	0.59	0.57	0.56	0.56	0.55	0.56	0.56	0.58	0.57	0.58	0.57	0.56	0.57	0.56	0.56	0.57	0.56	0.56	0.57	0.57	0.57
Sphingopyxis indica DS15	0.53	0.55	0.54	0.56	0.57	0.55	0.54	0.55	0.55	0.55	0.53	0.54	0.54	0.54	0.55	0.55	0.55	0.55	0.53	0.54	0.55	0.54	0.55	0.57	0.58	0.59	0.56	0.59	0.59	0.57	0.56	0.55	0.55	0.56	0.56	0.57	0.57	0.58	0.57	0.56	0.57	0.56	0.56	0.57	0.56	0.56	0.57	0.57	0.57
Sphingopyxis panaciterrulae DSM 27163	0.52	0.55	0.54	0.55	0.56	0.54	0.54	0.54	0.55	0.55	0.53	0.54	0.54	0.54	0.55	0.54	0.55	0.54	0.53	0.54	0.55	0.54	0.55	0.58	0.58	0.58	0.56	0.59	0.59	0.57	0.56	0.56	0.55	0.56	0.56	0.57	0.57	0.57	0.57	0.56	0.56	0.56	0.56	0.57	0.56	0.56	0.57	0.57	0.56
Sphingopyxis flava R11H	0.52	0.55	0.54	0.56	0.55	0.54	0.54	0.53	0.55	0.54	0.52	0.53	0.54	0.54	0.54	0.54	0.54	0.54	0.53	0.54	0.55	0.54	0.55	0.57	0.58	0.58	0.55	0.59	0.59	0.57	0.56	0.56	0.55	0.56	0.56	0.57	0.57	0.57	0.56	0.56	0.56	0.56	0.56	0.57	0.56	0.55	0.57	0.57	0.57
Sphingopyxis jiangsuensis XHP0097	0.53	0.56	0.54	0.56	0.56	0.54	0.54	0.54	0.55	0.56	0.54	0.54	0.55	0.55	0.55	0.55	0.55	0.55	0.54	0.54	0.55	0.55	0.55	0.58	0.59	0.59	0.57	0.59	0.59	0.57	0.56	0.56	0.56	0.56	0.56	0.58	0.57	0.58	0.58	0.57	0.57	0.56	0.56	0.57	0.57	0.57	0.58	0.57	0.57
Sphingopyxis terrae NBRC 15098	0.52	0.55	0.54	0.56	0.56	0.55	0.54	0.54	0.55	0.55	0.53	0.54	0.54	0.54	0.55	0.54	0.55	0.55	0.53	0.54	0.55	0.54	0.55	0.57	0.58	0.58	0.56	0.59	0.59	0.57	0.56	0.55	0.55	0.56	0.56	0.57	0.57	0.58	0.57	0.56	0.57	0.56	0.56	0.57	0.56	0.56	0.57	0.57	0.57
Sphingopyxis ummariensis DSM 24316	0.53	0.56	0.54	0.56	0.56	0.54	0.54	0.54	0.55	0.55	0.53	0.54	0.54	0.55	0.55	0.54	0.55	0.55	0.53	0.54	0.55	0.54	0.55	0.58	0.58	0.58	0.56	0.59	0.59	0.57	0.56	0.56	0.55	0.56	0.56	0.57	0.57	0.57	0.57	0.56	0.57	0.56	0.56	0.57	0.56	0.56	0.57	0.57	0.57
Sphingopyxis alaskensis RB2256	0.53	0.56	0.55	0.56	0.56	0.55	0.54	0.55	0.55	0.56	0.53	0.55	0.54	0.55	0.55	0.55	0.55	0.55	0.54	0.55	0.55	0.55	0.55	0.58	0.59	0.59	0.57	0.59	0.6	0.57	0.56	0.56	0.56	0.56	0.57	0.58	0.57	0.58	0.57	0.56	0.57	0.57	0.57	0.57	0.56	0.57	0.57	0.57	0.57
Sphingopyxis soli BL03	0.53	0.56	0.54	0.56	0.56	0.54	0.54	0.55	0.54	0.55	0.53	0.54	0.54	0.55	0.55	0.54	0.55	0.55	0.53	0.54	0.55	0.54	0.55	0.58	0.59	0.58	0.57	0.59	0.59	0.57	0.56	0.55	0.55	0.56	0.56	0.57	0.57	0.58	0.57	0.56	0.57	0.56	0.56	0.57	0.56	0.56	0.57	0.57	0.57
Sphingopyxis lindanitolerans WS5A3p	0.52	0.55	0.54	0.55	0.55	0.54	0.54	0.54	0.55	0.55	0.52	0.53	0.54	0.54	0.54	0.54	0.54	0.54	0.53	0.54	0.54	0.54	0.54	0.57	0.58	0.58	0.55	0.58	0.58	0.56	0.55	0.55	0.55	0.55	0.56	0.57	0.57	0.57	0.56	0.56	0.56	0.56	0.56	0.57	0.55	0.55	0.57	0.56	0.56
Sphingopyxis macrogoltabida 203	0.52	0.55	0.54	0.55	0.56	0.53	0.53	0.54	0.54	0.54	0.52	0.53	0.54	0.54	0.54	0.54	0.54	0.54	0.53	0.54	0.54	0.54	0.54	0.57	0.58	0.58	0.55	0.59	0.59	0.56	0.55	0.55	0.54	0.55	0.56	0.57	0.56	0.57	0.56	0.56	0.56	0.56	0.56	0.57	0.56	0.55	0.57	0.56	0.56
Sphingopyxis italica DSM 25229	0.52	0.56	0.55	0.56	0.56	0.54	0.54	0.54	0.55	0.55	0.53	0.54	0.54	0.54	0.54	0.54	0.55	0.55	0.53	0.53	0.54	0.54	0.55	0.57	0.59	0.58	0.57	0.59	0.59	0.57	0.56	0.55	0.55	0.55	0.56	0.57	0.57	0.57	0.56	0.56	0.56	0.56	0.56	0.57	0.56	0.56	0.57	0.57	0.57
Sphingopyxis panaciterrae DSM 27164	0.52	0.55	0.54	0.55	0.55	0.53	0.53	0.54	0.54	0.54	0.52	0.53	0.54	0.54	0.54	0.54	0.54	0.55	0.52	0.53	0.54	0.54	0.55	0.57	0.58	0.58	0.56	0.58	0.58	0.57	0.55	0.55	0.55	0.55	0.56	0.57	0.57	0.57	0.56	0.56	0.56	0.56	0.56	0.57	0.56	0.55	0.57	0.56	0.56
Sphingopyxis fribergensis Kp5.2	0.52	0.55	0.54	0.55	0.55	0.53	0.53	0.54	0.54	0.54	0.52	0.53	0.53	0.54	0.54	0.54	0.54	0.54	0.53	0.53	0.54	0.53	0.54	0.56	0.58	0.58	0.56	0.58	0.58	0.56	0.55	0.55	0.55	0.55	0.55	0.57	0.56	0.57	0.56	0.55	0.56	0.56	0.55	0.56	0.55	0.55	0.57	0.56	0.56
Sphingopyxis witflariensis DSM 14551	0.52	0.55	0.54	0.55	0.55	0.53	0.53	0.54	0.54	0.55	0.52	0.53	0.54	0.54	0.54	0.54	0.54	0.54	0.53	0.53	0.54	0.53	0.54	0.56	0.58	0.58	0.55	0.58	0.58	0.57	0.55	0.55	0.55	0.55	0.56	0.57	0.56	0.57	0.56	0.55	0.56	0.56	0.55	0.56	0.55	0.55	0.57	0.56	0.56
Sphingopyxis bauzanensis DSM 22271	0.52	0.55	0.54	0.55	0.55	0.53	0.53	0.53	0.53	0.55	0.52	0.53	0.53	0.54	0.54	0.54	0.54	0.54	0.53	0.54	0.55	0.54	0.54	0.57	0.58	0.58	0.56	0.58	0.58	0.56	0.55	0.55	0.55	0.56	0.56	0.57	0.56	0.57	0.56	0.55	0.56	0.55	0.56	0.56	0.55	0.55	0.57	0.56	0.56
Sphingopyxis solisilvae R366	0.52	0.56	0.54	0.56	0.56	0.54	0.54	0.54	0.54	0.55	0.53	0.54	0.54	0.55	0.55	0.54	0.55	0.55	0.53	0.54	0.55	0.54	0.55	0.57	0.58	0.58	0.56	0.59	0.59	0.57	0.56	0.55	0.55	0.56	0.56	0.57	0.57	0.58	0.57	0.56	0.57	0.56	0.56	0.57	0.56	0.56	0.57	0.56	0.56
Parasphingorhabdus flavimaris DSM 16223	0.51	0.54	0.53	0.54	0.54	0.52	0.52	0.52	0.52	0.53	0.52	0.52	0.53	0.53	0.53	0.53	0.53	0.53	0.52	0.52	0.53	0.53	0.53	0.56	0.57	0.57	0.54	0.57	0.58	0.56	0.55	0.55	0.54	0.55	0.55	0.55	0.55	0.56	0.55	0.54	0.55	0.54	0.54	0.55	0.55	0.54	0.56	0.55	0.55
Parasphingorhabdus marina DSM 22363	0.51	0.53	0.53	0.53	0.53	0.52	0.53	0.51	0.51	0.53	0.51	0.52	0.53	0.53	0.53	0.53	0.52	0.52	0.52	0.52	0.53	0.52	0.53	0.55	0.57	0.57	0.53	0.57	0.57	0.56	0.54	0.55	0.54	0.54	0.55	0.55	0.55	0.55	0.55	0.54	0.54	0.53	0.54	0.55	0.54	0.54	0.55	0.54	0.54
Parasphingorhabdus cellanae JHSY0214	0.51	0.53	0.53	0.53	0.53	0.52	0.52	0.51	0.52	0.53	0.51	0.52	0.53	0.53	0.53	0.53	0.52	0.53	0.51	0.52	0.53	0.52	0.53	0.55	0.57	0.57	0.54	0.57	0.57	0.56	0.55	0.55	0.54	0.54	0.55	0.55	0.54	0.55	0.55	0.53	0.54	0.53	0.54	0.55	0.54	0.53	0.55	0.54	0.54
Parasphingorhabdus litoris DSM 22379	0.51	0.53	0.53	0.53	0.53	0.52	0.52	0.51	0.51	0.53	0.51	0.52	0.53	0.53	0.53	0.53	0.52	0.52	0.51	0.52	0.53	0.52	0.53	0.55	0.57	0.57	0.54	0.57	0.57	0.56	0.55	0.55	0.54	0.54	0.55	0.55	0.55	0.55	0.54	0.53	0.55	0.53	0.54	0.54	0.54	0.54	0.55	0.55	0.55
Novosphingopyxis iocasae PB63	0.52	0.55	0.56	0.54	0.54	0.53	0.53	0.53	0.53	0.54	0.53	0.53	0.53	0.54	0.54	0.54	0.54	0.53	0.52	0.53	0.53	0.53	0.54	0.57	0.58	0.58	0.56	0.58	0.58	0.57	0.56	0.56	0.56	0.56	0.56	0.56	0.56	0.57	0.56	0.55	0.56	0.56	0.55	0.56	0.55	0.55	0.56	0.56	0.56
Novosphingopyxis baekryungensis DSM 16222	0.52	0.54	0.55	0.54	0.54	0.53	0.53	0.53	0.53	0.54	0.53	0.53	0.54	0.54	0.54	0.54	0.54	0.54	0.53	0.53	0.53	0.53	0.53	0.57	0.58	0.58	0.56	0.58	0.58	0.57	0.56	0.56	0.56	0.56	0.56	0.56	0.56	0.57	0.56	0.55	0.56	0.55	0.55	0.56	0.55	0.56	0.57	0.56	0.56
Sphingorhabdus lutea LPB0140	0.5	0.53	0.52	0.52	0.53	0.52	0.51	0.51	0.51	0.53	0.51	0.51	0.52	0.52	0.52	0.52	0.52	0.52	0.51	0.52	0.52	0.52	0.52	0.54	0.55	0.55	0.53	0.56	0.56	0.54	0.54	0.54	0.53	0.54	0.54	0.54	0.54	0.55	0.54	0.53	0.54	0.53	0.53	0.54	0.53	0.53	0.54	0.53	0.53
Sphingorhabdus arenilitoris CECT 8531	0.51	0.54	0.53	0.54	0.54	0.53	0.53	0.52	0.53	0.55	0.52	0.53	0.53	0.54	0.54	0.54	0.54	0.53	0.52	0.53	0.54	0.53	0.54	0.56	0.57	0.57	0.55	0.57	0.57	0.56	0.55	0.55	0.55	0.55	0.55	0.56	0.56	0.56	0.56	0.54	0.55	0.55	0.55	0.55	0.55	0.55	0.56	0.55	0.55
Sphingorhabdus pulchriflava GY_G	0.5168	0.5478	0.5314	0.5448	0.546	0.5346	0.5334	0.5256	0.5333	0.5539	0.5233	0.5298	0.5312	0.5377	0.5396	0.5371	0.537	0.5389	0.5267	0.5337	0.5473	0.5406	0.5479	0.5611	0.5721	0.5718	0.5511	0.582	0.583	0.5617	0.5511	0.551	0.5481	0.5499	0.554	0.5629	0.5629	0.567	0.5631	0.5521	0.5563	0.5484	0.5507	0.5609	0.5546	0.5469	0.5625	0.5547	0.5556
Sphingorhabdus rigui DSM 29050	0.53	0.56	0.54	0.56	0.56	0.55	0.54	0.54	0.54	0.56	0.54	0.54	0.54	0.55	0.55	0.55	0.55	0.55	0.54	0.54	0.55	0.55	0.56	0.57	0.59	0.58	0.57	0.59	0.59	0.56	0.56	0.55	0.55	0.56	0.56	0.57	0.57	0.57	0.57	0.56	0.57	0.56	0.56	0.56	0.56	0.56	0.57	0.56	0.56
Sphingorhabdus wooponensis 03SU3-P	0.53	0.56	0.55	0.56	0.56	0.55	0.54	0.54	0.54	0.56	0.54	0.55	0.55	0.55	0.55	0.55	0.55	0.55	0.54	0.55	0.56	0.55	0.56	0.58	0.59	0.59	0.57	0.59	0.59	0.56	0.56	0.56	0.56	0.56	0.56	0.57	0.57	0.58	0.58	0.57	0.57	0.56	0.56	0.57	0.56	0.56	0.57	0.57	0.57
Sphingorhabdus profundilacus IMCC26285	0.52	0.55	0.53	0.55	0.54	0.54	0.53	0.53	0.53	0.55	0.53	0.53	0.54	0.54	0.54	0.54	0.54	0.54	0.53	0.54	0.55	0.54	0.55	0.56	0.57	0.57	0.55	0.58	0.58	0.56	0.55	0.55	0.54	0.55	0.55	0.56	0.56	0.56	0.56	0.55	0.56	0.55	0.55	0.56	0.55	0.55	0.56	0.55	0.55
Sphingorhabdus lacus IMCC1753	0.52	0.54	0.53	0.55	0.54	0.54	0.53	0.52	0.53	0.55	0.53	0.53	0.53	0.54	0.54	0.54	0.54	0.53	0.53	0.53	0.54	0.54	0.55	0.56	0.58	0.57	0.55	0.58	0.58	0.56	0.55	0.55	0.54	0.55	0.55	0.56	0.56	0.56	0.56	0.55	0.56	0.55	0.55	0.56	0.55	0.55	0.56	0.55	0.55
Sphingorhabdus contaminans KCTC 32445	0.51	0.55	0.53	0.54	0.54	0.54	0.53	0.53	0.53	0.55	0.52	0.53	0.54	0.54	0.54	0.54	0.54	0.53	0.53	0.54	0.54	0.54	0.55	0.56	0.57	0.57	0.55	0.58	0.58	0.56	0.55	0.55	0.54	0.55	0.55	0.56	0.56	0.56	0.56	0.55	0.56	0.55	0.55	0.56	0.55	0.55	0.56	0.55	0.55
Blastomonas fulva T2	0.52	0.55	0.54	0.55	0.55	0.54	0.54	0.53	0.53	0.55	0.53	0.54	0.55	0.55	0.55	0.55	0.55	0.54	0.54	0.55	0.55	0.54	0.55	0.57	0.58	0.58	0.56	0.58	0.58	0.56	0.55	0.55	0.55	0.55	0.56	0.56	0.56	0.57	0.56	0.55	0.56	0.55	0.56	0.56	0.56	0.55	0.57	0.56	0.56
Blastomonas aquatica CGMCC 1.12851	0.52	0.55	0.54	0.55	0.55	0.54	0.54	0.53	0.53	0.55	0.53	0.54	0.55	0.55	0.55	0.55	0.55	0.54	0.54	0.54	0.55	0.54	0.55	0.57	0.58	0.58	0.56	0.58	0.58	0.56	0.55	0.55	0.55	0.55	0.56	0.56	0.56	0.56	0.56	0.55	0.56	0.55	0.56	0.56	0.55	0.55	0.57	0.55	0.56
Blastomonas natatoria DSM 3183	0.52	0.55	0.54	0.55	0.55	0.54	0.55	0.53	0.54	0.55	0.53	0.54	0.55	0.55	0.55	0.55	0.55	0.55	0.54	0.55	0.55	0.55	0.55	0.57	0.58	0.58	0.56	0.58	0.58	0.56	0.55	0.55	0.55	0.55	0.56	0.56	0.56	0.57	0.56	0.56	0.56	0.55	0.56	0.57	0.56	0.55	0.57	0.56	0.56
Blastomonas ursincola KR 99	0.52	0.55	0.54	0.55	0.55	0.55	0.54	0.54	0.54	0.55	0.53	0.55	0.55	0.55	0.55	0.55	0.55	0.54	0.54	0.54	0.55	0.55	0.55	0.57	0.59	0.58	0.56	0.59	0.59	0.56	0.55	0.55	0.55	0.55	0.56	0.57	0.56	0.57	0.56	0.56	0.56	0.55	0.56	0.57	0.56	0.55	0.57	0.56	0.56
Novosphingobium ipomoeae KCTC 42656	0.52	0.55	0.54	0.55	0.55	0.54	0.54	0.53	0.53	0.55	0.53	0.54	0.54	0.54	0.55	0.55	0.54	0.54	0.53	0.54	0.55	0.54	0.55	0.57	0.58	0.58	0.56	0.58	0.58	0.56	0.55	0.55	0.55	0.55	0.56	0.56	0.56	0.56	0.56	0.55	0.56	0.55	0.55	0.56	0.55	0.55	0.56	0.56	0.56
Novosphingobium sediminicola NBRC 106119	0.51	0.53	0.52	0.54	0.54	0.53	0.54	0.52	0.53	0.54	0.53	0.53	0.53	0.53	0.54	0.53	0.53	0.53	0.53	0.54	0.54	0.54	0.54	0.55	0.56	0.56	0.54	0.56	0.56	0.55	0.54	0.54	0.53	0.54	0.54	0.55	0.55	0.55	0.56	0.55	0.54	0.55	0.55	0.56	0.54	0.54	0.55	0.54	0.55
Novosphingobium arvoryzae KCTC 32422	0.5186	0.5497	0.5339	0.5462	0.5451	0.5334	0.5392	0.5305	0.5322	0.5514	0.5309	0.5311	0.5384	0.5384	0.5431	0.5399	0.5405	0.5388	0.5311	0.5482	0.548	0.548	0.548	0.5629	0.5725	0.5724	0.5537	0.573	0.5752	0.563	0.5525	0.5499	0.5446	0.5479	0.5569	0.5658	0.5618	0.5658	0.5607	0.5575	0.562	0.5578	0.5559	0.5651	0.5578	0.5522	0.5667	0.5558	0.5573
Novosphingobium kunmingense CGMCC 1.12274	0.52	0.54	0.54	0.55	0.55	0.53	0.54	0.53	0.53	0.54	0.53	0.53	0.53	0.54	0.54	0.54	0.54	0.54	0.52	0.54	0.55	0.54	0.55	0.56	0.56	0.57	0.55	0.57	0.57	0.56	0.55	0.55	0.54	0.55	0.55	0.56	0.56	0.56	0.56	0.55	0.55	0.55	0.55	0.56	0.55	0.55	0.56	0.55	0.55
Novosphingobium aquiterrae NCAIM B 02537	0.5127	0.5425	0.5314	0.5441	0.5426	0.5332	0.5382	0.5261	0.5291	0.5482	0.5295	0.5315	0.5359	0.5386	0.5415	0.5357	0.539	0.5378	0.5267	0.5394	0.5471	0.5454	0.544	0.5606	0.5639	0.5623	0.5451	0.5734	0.5744	0.5574	0.5462	0.5435	0.5437	0.5462	0.5494	0.5595	0.5599	0.5613	0.5627	0.5516	0.5559	0.5537	0.5508	0.5587	0.5506	0.5469	0.5623	0.5538	0.5562
Novosphingobium rosa NBRC 15208	0.51	0.52	0.52	0.52	0.52	0.51	0.51	0.52	0.52	0.52	0.52	0.51	0.51	0.52	0.52	0.52	0.52	0.52	0.51	0.51	0.52	0.51	0.52	0.54	0.54	0.54	0.54	0.55	0.55	0.54	0.53	0.52	0.52	0.53	0.53	0.54	0.54	0.54	0.53	0.54	0.53	0.54	0.53	0.54	0.54	0.53	0.54	0.54	0.53
Novosphingobium ovatum FSY-8	0.51	0.52	0.52	0.52	0.52	0.52	0.53	0.52	0.52	0.53	0.52	0.52	0.52	0.52	0.53	0.53	0.52	0.52	0.51	0.52	0.53	0.52	0.53	0.54	0.55	0.55	0.53	0.55	0.55	0.54	0.53	0.53	0.53	0.53	0.53	0.55	0.54	0.54	0.54	0.54	0.54	0.53	0.54	0.54	0.54	0.53	0.55	0.54	0.54
Novosphingobium humi KACC	0.51	0.52	0.51	0.52	0.52	0.52	0.52	0.52	0.52	0.52	0.52	0.52	0.52	0.52	0.52	0.52	0.52	0.52	0.51	0.51	0.52	0.52	0.52	0.54	0.54	0.54	0.54	0.55	0.55	0.54	0.53	0.53	0.52	0.53	0.53	0.54	0.54	0.54	0.54	0.54	0.53	0.53	0.53	0.54	0.54	0.53	0.54	0.53	0.53
Novosphingobium umbonatum FSY-9	0.5	0.52	0.52	0.52	0.52	0.52	0.52	0.51	0.52	0.53	0.52	0.52	0.52	0.52	0.53	0.53	0.52	0.52	0.51	0.52	0.53	0.53	0.53	0.54	0.54	0.54	0.53	0.55	0.55	0.54	0.53	0.53	0.53	0.53	0.54	0.54	0.54	0.54	0.54	0.54	0.53	0.53	0.54	0.54	0.54	0.53	0.54	0.54	0.53
Novosphingobium piscinae KCTC 42194	0.52	0.54	0.53	0.54	0.54	0.54	0.54	0.53	0.54	0.54	0.54	0.54	0.54	0.54	0.54	0.54	0.54	0.54	0.54	0.54	0.55	0.54	0.55	0.56	0.57	0.57	0.55	0.57	0.57	0.56	0.55	0.55	0.54	0.55	0.55	0.56	0.56	0.56	0.56	0.56	0.56	0.56	0.56	0.56	0.56	0.55	0.56	0.56	0.56
Novosphingobium aerophilum 4Y4	0.5117	0.5399	0.5302	0.5377	0.5379	0.5327	0.5346	0.5228	0.5275	0.5411	0.5352	0.533	0.5351	0.539	0.543	0.54	0.5401	0.5318	0.5329	0.5363	0.5381	0.538	0.5423	0.5596	0.5618	0.5587	0.5486	0.5684	0.5708	0.5546	0.544	0.5417	0.5416	0.543	0.549	0.5581	0.5547	0.5613	0.5587	0.5524	0.552	0.5511	0.5552	0.5584	0.5537	0.5441	0.56	0.5505	0.5518
Novosphingobium flavum NBRC 111647	0.52	0.53	0.52	0.53	0.53	0.53	0.53	0.52	0.52	0.53	0.52	0.52	0.53	0.53	0.53	0.53	0.53	0.53	0.52	0.52	0.53	0.53	0.53	0.56	0.56	0.56	0.55	0.56	0.57	0.55	0.54	0.54	0.54	0.54	0.55	0.55	0.55	0.56	0.55	0.55	0.55	0.55	0.54	0.55	0.55	0.54	0.55	0.55	0.55
Novosphingobium bradum KCTC 42984	0.52	0.54	0.53	0.54	0.54	0.53	0.54	0.53	0.53	0.54	0.53	0.53	0.53	0.54	0.54	0.54	0.54	0.53	0.53	0.54	0.54	0.53	0.54	0.56	0.57	0.57	0.55	0.57	0.57	0.56	0.55	0.54	0.54	0.54	0.55	0.56	0.56	0.56	0.56	0.55	0.56	0.56	0.55	0.56	0.55	0.55	0.56	0.55	0.56
Novosphingobium lentum NBRC 107847	0.51	0.54	0.52	0.54	0.54	0.53	0.53	0.54	0.53	0.54	0.53	0.54	0.53	0.53	0.54	0.53	0.53	0.53	0.52	0.53	0.54	0.53	0.54	0.56	0.56	0.56	0.54	0.56	0.57	0.55	0.54	0.54	0.54	0.54	0.55	0.56	0.56	0.56	0.55	0.55	0.55	0.55	0.55	0.55	0.55	0.54	0.56	0.55	0.55
Novosphingobium nitrogenifigens DSM 19370	0.51	0.53	0.53	0.53	0.53	0.52	0.53	0.53	0.52	0.53	0.52	0.52	0.52	0.52	0.52	0.52	0.53	0.53	0.52	0.52	0.54	0.53	0.53	0.55	0.56	0.55	0.54	0.56	0.56	0.55	0.54	0.54	0.54	0.54	0.54	0.55	0.55	0.55	0.55	0.55	0.55	0.54	0.54	0.55	0.54	0.54	0.55	0.55	0.55
Novosphingobium acidiphilum DSM 19966	0.5082	0.5299	0.5228	0.5329	0.5337	0.5309	0.534	0.5228	0.5253	0.5451	0.5331	0.5277	0.5319	0.5335	0.5384	0.5361	0.5331	0.5279	0.5266	0.5297	0.5426	0.5409	0.5384	0.5502	0.5516	0.55	0.5404	0.5583	0.5614	0.5454	0.5392	0.5319	0.5318	0.5373	0.543	0.5505	0.5473	0.5504	0.5498	0.5464	0.5466	0.544	0.5415	0.5547	0.5435	0.5373	0.5541	0.5403	0.5471
Novosphingobium rhizosphaerae CCM 8547	0.52	0.53	0.53	0.53	0.53	0.53	0.53	0.53	0.53	0.53	0.53	0.53	0.53	0.53	0.53	0.53	0.53	0.53	0.52	0.53	0.54	0.54	0.54	0.55	0.56	0.55	0.55	0.56	0.56	0.55	0.54	0.54	0.53	0.54	0.54	0.55	0.55	0.55	0.55	0.55	0.54	0.55	0.55	0.56	0.55	0.53	0.55	0.54	0.54
Novosphingobium capsulatum NBRC 12533	0.52	0.53	0.53	0.53	0.53	0.53	0.53	0.53	0.53	0.54	0.53	0.53	0.53	0.53	0.54	0.53	0.53	0.53	0.52	0.53	0.54	0.54	0.54	0.55	0.55	0.55	0.55	0.56	0.56	0.55	0.54	0.54	0.54	0.54	0.54	0.55	0.55	0.55	0.55	0.55	0.55	0.55	0.55	0.55	0.55	0.54	0.55	0.55	0.55
Novosphingobium pokkalii KCTC 42224	0.52	0.53	0.53	0.53	0.53	0.53	0.53	0.53	0.53	0.54	0.53	0.53	0.53	0.53	0.54	0.53	0.53	0.53	0.52	0.53	0.54	0.54	0.54	0.55	0.55	0.56	0.55	0.57	0.57	0.55	0.54	0.54	0.54	0.54	0.54	0.55	0.55	0.55	0.56	0.56	0.54	0.54	0.55	0.56	0.55	0.54	0.55	0.54	0.55
Novosphingobium fuchskuhlense FNE08-7	0.52	0.54	0.53	0.54	0.54	0.53	0.54	0.52	0.53	0.54	0.53	0.54	0.54	0.54	0.54	0.54	0.54	0.53	0.53	0.54	0.55	0.54	0.54	0.55	0.56	0.56	0.54	0.56	0.57	0.55	0.54	0.54	0.54	0.54	0.55	0.55	0.55	0.55	0.56	0.55	0.55	0.55	0.55	0.56	0.55	0.54	0.55	0.54	0.55
Novosphingobium percolationis c1	0.52	0.54	0.53	0.54	0.54	0.53	0.54	0.53	0.53	0.55	0.53	0.53	0.53	0.54	0.54	0.53	0.53	0.54	0.52	0.53	0.54	0.54	0.54	0.56	0.57	0.56	0.55	0.57	0.57	0.55	0.55	0.54	0.54	0.54	0.55	0.55	0.55	0.56	0.56	0.56	0.55	0.55	0.55	0.56	0.55	0.54	0.56	0.55	0.55
Novosphingobium huizhouense c7	0.52	0.54	0.53	0.54	0.54	0.53	0.54	0.53	0.53	0.55	0.54	0.53	0.53	0.54	0.54	0.54	0.54	0.54	0.53	0.53	0.55	0.54	0.54	0.56	0.57	0.57	0.55	0.57	0.57	0.56	0.55	0.54	0.54	0.55	0.55	0.56	0.56	0.56	0.56	0.56	0.56	0.55	0.55	0.56	0.56	0.55	0.56	0.55	0.56
Novosphingobium olei TW-4	0.52	0.54	0.53	0.53	0.54	0.53	0.53	0.52	0.53	0.54	0.53	0.53	0.53	0.53	0.53	0.53	0.53	0.53	0.52	0.53	0.54	0.53	0.54	0.56	0.56	0.56	0.55	0.57	0.57	0.55	0.54	0.54	0.54	0.54	0.55	0.55	0.55	0.56	0.55	0.55	0.55	0.55	0.55	0.56	0.55	0.54	0.56	0.55	0.55
Novosphingobium hassiacum DSM 14552	0.51	0.53	0.52	0.53	0.53	0.52	0.52	0.52	0.52	0.53	0.52	0.53	0.53	0.53	0.54	0.53	0.53	0.52	0.52	0.53	0.54	0.53	0.53	0.55	0.56	0.56	0.54	0.56	0.57	0.55	0.54	0.54	0.53	0.54	0.54	0.55	0.55	0.55	0.55	0.54	0.54	0.55	0.54	0.55	0.54	0.54	0.55	0.54	0.54
Novosphingobium meiothermophilum SYSU G00007	0.51	0.54	0.53	0.54	0.54	0.53	0.54	0.53	0.53	0.54	0.53	0.54	0.54	0.54	0.54	0.54	0.54	0.53	0.53	0.54	0.55	0.54	0.55	0.56	0.56	0.56	0.55	0.57	0.57	0.56	0.55	0.55	0.54	0.55	0.55	0.56	0.56	0.56	0.56	0.55	0.56	0.55	0.55	0.56	0.56	0.55	0.56	0.55	0.55
Novosphingobium aromaticivorans DSM 12444	0.5167	0.5433	0.5305	0.5388	0.5401	0.531	0.5317	0.5245	0.5328	0.5393	0.5263	0.5339	0.5334	0.5342	0.5386	0.535	0.5333	0.5328	0.5239	0.5324	0.5437	0.5398	0.5373	0.558	0.5643	0.5657	0.5492	0.571	0.5732	0.5551	0.542	0.5419	0.5419	0.5427	0.5479	0.5574	0.5582	0.56	0.556	0.551	0.5534	0.5516	0.5519	0.5562	0.5536	0.5434	0.5617	0.5486	0.5491
Novosphingobium taihuense CGMCC 1.3432	0.51	0.54	0.53	0.53	0.53	0.53	0.53	0.52	0.53	0.54	0.52	0.53	0.53	0.53	0.54	0.54	0.53	0.53	0.53	0.53	0.54	0.54	0.54	0.55	0.56	0.56	0.54	0.56	0.56	0.55	0.54	0.54	0.54	0.54	0.54	0.55	0.56	0.55	0.56	0.55	0.55	0.55	0.55	0.56	0.55	0.54	0.56	0.55	0.55
Novosphingobium jiangmenense 1Y9A	0.51	0.54	0.52	0.53	0.53	0.53	0.53	0.52	0.53	0.54	0.52	0.53	0.53	0.53	0.54	0.54	0.53	0.53	0.52	0.53	0.54	0.54	0.54	0.55	0.56	0.56	0.54	0.57	0.57	0.55	0.54	0.54	0.54	0.54	0.55	0.55	0.56	0.56	0.56	0.55	0.55	0.55	0.55	0.55	0.55	0.54	0.56	0.55	0.55
Novosphingobium subterraneum DSM 12447	0.51	0.54	0.53	0.53	0.54	0.53	0.53	0.53	0.53	0.53	0.53	0.53	0.53	0.53	0.54	0.53	0.53	0.53	0.52	0.53	0.54	0.53	0.54	0.55	0.56	0.56	0.54	0.57	0.57	0.55	0.54	0.54	0.54	0.54	0.55	0.55	0.55	0.56	0.55	0.54	0.55	0.55	0.55	0.55	0.55	0.54	0.55	0.55	0.54
Novosphingobium marinum CGMCC 1.12918	0.51	0.54	0.55	0.53	0.54	0.52	0.53	0.52	0.53	0.53	0.51	0.53	0.52	0.53	0.53	0.53	0.53	0.52	0.52	0.52	0.53	0.52	0.53	0.55	0.56	0.56	0.54	0.56	0.57	0.56	0.54	0.54	0.55	0.55	0.55	0.56	0.55	0.55	0.56	0.54	0.54	0.54	0.54	0.55	0.54	0.54	0.55	0.55	0.55
Novosphingobium aquimarinum M24A2M	0.5083	0.5314	0.5407	0.5311	0.535	0.5188	0.5207	0.5395	0.5203	0.5217	0.5105	0.5249	0.5168	0.5227	0.5255	0.5188	0.5185	0.5201	0.5099	0.5186	0.5244	0.5202	0.5254	0.5474	0.5594	0.5543	0.5357	0.5589	0.5606	0.5481	0.5344	0.5378	0.5368	0.5336	0.5419	0.5462	0.5435	0.5441	0.5377	0.5366	0.5365	0.538	0.5365	0.5407	0.5374	0.5317	0.5481	0.5413	0.5377
Novosphingobium fluoreni DSM 27568	0.51	0.53	0.53	0.53	0.54	0.52	0.52	0.53	0.52	0.53	0.52	0.53	0.52	0.53	0.53	0.53	0.53	0.53	0.52	0.52	0.53	0.52	0.53	0.55	0.56	0.56	0.55	0.57	0.56	0.55	0.54	0.54	0.54	0.54	0.54	0.55	0.55	0.55	0.55	0.55	0.55	0.54	0.54	0.55	0.55	0.54	0.55	0.55	0.55
Novosphingobium chloroacetimidivorans S00245	0.51	0.53	0.53	0.53	0.53	0.52	0.52	0.52	0.52	0.53	0.52	0.52	0.52	0.53	0.53	0.53	0.53	0.52	0.51	0.52	0.52	0.52	0.53	0.55	0.56	0.56	0.54	0.56	0.56	0.55	0.53	0.53	0.53	0.53	0.54	0.55	0.55	0.55	0.54	0.55	0.54	0.54	0.54	0.55	0.54	0.54	0.55	0.54	0.55
Novosphingobium colocasiae KCTC 32255	0.51	0.53	0.52	0.53	0.54	0.52	0.52	0.52	0.52	0.53	0.52	0.52	0.52	0.53	0.53	0.52	0.53	0.53	0.52	0.53	0.53	0.52	0.53	0.55	0.56	0.55	0.54	0.56	0.56	0.55	0.54	0.54	0.54	0.54	0.54	0.55	0.55	0.55	0.54	0.54	0.54	0.54	0.54	0.55	0.54	0.54	0.55	0.55	0.55
Novosphingobium endophyticum CGMCC 1.15095	0.51	0.53	0.53	0.54	0.54	0.52	0.53	0.52	0.52	0.53	0.51	0.52	0.52	0.53	0.53	0.53	0.52	0.52	0.52	0.52	0.53	0.52	0.53	0.55	0.55	0.56	0.54	0.56	0.56	0.55	0.54	0.54	0.53	0.54	0.54	0.55	0.55	0.55	0.54	0.54	0.54	0.54	0.54	0.55	0.54	0.54	0.55	0.54	0.54
Novosphingobium mathurense SM117	0.51	0.53	0.52	0.54	0.54	0.52	0.52	0.52	0.52	0.52	0.52	0.53	0.52	0.52	0.52	0.52	0.52	0.52	0.51	0.52	0.53	0.52	0.53	0.55	0.55	0.55	0.54	0.56	0.56	0.55	0.54	0.53	0.53	0.54	0.54	0.55	0.54	0.55	0.55	0.54	0.54	0.53	0.54	0.54	0.54	0.54	0.55	0.54	0.54
Novosphingobium pentaromativorans US6-1	0.51	0.53	0.53	0.53	0.53	0.52	0.52	0.52	0.52	0.53	0.52	0.51	0.52	0.52	0.53	0.52	0.52	0.52	0.52	0.52	0.52	0.53	0.53	0.55	0.55	0.56	0.54	0.56	0.56	0.55	0.54	0.54	0.54	0.54	0.54	0.55	0.55	0.55	0.54	0.54	0.54	0.54	0.54	0.55	0.54	0.54	0.55	0.54	0.54
Novosphingobium decolorationis 502str22	0.52	0.53	0.53	0.52	0.53	0.52	0.52	0.53	0.53	0.52	0.51	0.52	0.52	0.52	0.52	0.52	0.52	0.52	0.51	0.52	0.52	0.52	0.53	0.54	0.55	0.55	0.54	0.56	0.55	0.55	0.54	0.53	0.53	0.54	0.54	0.55	0.54	0.54	0.54	0.54	0.54	0.53	0.54	0.54	0.54	0.53	0.54	0.54	0.54
Novosphingobium aureum YJ-S2-02	0.51	0.53	0.53	0.52	0.52	0.51	0.52	0.52	0.52	0.52	0.51	0.52	0.52	0.52	0.53	0.53	0.52	0.52	0.51	0.52	0.53	0.52	0.53	0.54	0.55	0.55	0.54	0.56	0.56	0.55	0.54	0.54	0.53	0.54	0.54	0.54	0.54	0.55	0.54	0.54	0.54	0.53	0.53	0.54	0.54	0.53	0.54	0.54	0.54
Novosphingobium naphthalenivorans NBRC 102051	0.51	0.53	0.53	0.54	0.54	0.52	0.52	0.53	0.53	0.53	0.51	0.52	0.51	0.52	0.52	0.52	0.52	0.52	0.51	0.52	0.52	0.52	0.53	0.55	0.55	0.55	0.54	0.56	0.55	0.55	0.54	0.53	0.53	0.54	0.54	0.54	0.54	0.55	0.54	0.54	0.54	0.54	0.53	0.54	0.54	0.54	0.55	0.54	0.54
Novosphingobium indicum CGMCC 1.6784	0.51	0.52	0.53	0.53	0.53	0.51	0.52	0.52	0.52	0.52	0.51	0.52	0.51	0.52	0.52	0.52	0.52	0.52	0.51	0.52	0.52	0.52	0.52	0.54	0.55	0.55	0.53	0.56	0.56	0.55	0.54	0.53	0.53	0.53	0.54	0.54	0.54	0.55	0.54	0.54	0.54	0.53	0.53	0.54	0.54	0.53	0.55	0.54	0.54
Novosphingobium malaysiense MUSC 273	0.51	0.53	0.53	0.53	0.53	0.51	0.52	0.52	0.52	0.52	0.51	0.52	0.51	0.52	0.52	0.52	0.52	0.52	0.51	0.51	0.53	0.52	0.52	0.55	0.56	0.55	0.53	0.56	0.56	0.55	0.54	0.54	0.53	0.54	0.54	0.55	0.54	0.55	0.54	0.54	0.54	0.53	0.53	0.54	0.54	0.54	0.55	0.54	0.54
Novosphingobium clariflavum CICC 11035s	0.52	0.53	0.53	0.53	0.53	0.52	0.52	0.52	0.53	0.52	0.52	0.52	0.52	0.52	0.52	0.52	0.53	0.52	0.51	0.52	0.52	0.53	0.53	0.54	0.55	0.55	0.54	0.56	0.56	0.55	0.53	0.53	0.53	0.54	0.54	0.55	0.54	0.55	0.54	0.55	0.54	0.54	0.54	0.55	0.54	0.53	0.55	0.54	0.54
Novosphingobium lindaniclasticum LE124	0.52	0.53	0.53	0.53	0.53	0.52	0.52	0.52	0.53	0.52	0.52	0.52	0.52	0.52	0.53	0.52	0.53	0.53	0.51	0.52	0.52	0.52	0.53	0.55	0.55	0.55	0.55	0.56	0.56	0.55	0.53	0.54	0.53	0.53	0.54	0.55	0.55	0.55	0.54	0.54	0.54	0.54	0.54	0.54	0.55	0.54	0.55	0.54	0.54
Novosphingobium silvae FGD1	0.52	0.53	0.53	0.53	0.53	0.53	0.52	0.53	0.53	0.52	0.52	0.52	0.52	0.53	0.52	0.52	0.53	0.52	0.51	0.52	0.53	0.52	0.53	0.55	0.55	0.55	0.54	0.56	0.56	0.54	0.54	0.53	0.53	0.54	0.54	0.55	0.54	0.55	0.54	0.55	0.54	0.54	0.54	0.55	0.54	0.54	0.55	0.54	0.54
Novosphingobium barchaimii LL02	0.51	0.53	0.52	0.53	0.53	0.51	0.52	0.52	0.53	0.52	0.51	0.52	0.52	0.52	0.53	0.53	0.52	0.52	0.51	0.51	0.52	0.52	0.52	0.54	0.55	0.55	0.54	0.56	0.56	0.54	0.53	0.53	0.53	0.53	0.54	0.54	0.54	0.55	0.54	0.54	0.54	0.53	0.54	0.54	0.54	0.53	0.54	0.54	0.54
Novosphingobium soli CCM 7706	0.52	0.53	0.53	0.53	0.54	0.52	0.53	0.54	0.53	0.53	0.52	0.53	0.52	0.53	0.53	0.53	0.53	0.53	0.52	0.53	0.53	0.52	0.53	0.55	0.56	0.56	0.54	0.56	0.56	0.55	0.54	0.54	0.53	0.53	0.54	0.55	0.55	0.55	0.54	0.55	0.54	0.55	0.54	0.55	0.54	0.54	0.55	0.54	0.54
Novosphingobium panipatense CCM 7472	0.51	0.53	0.53	0.53	0.53	0.51	0.52	0.52	0.52	0.53	0.52	0.52	0.53	0.52	0.53	0.52	0.53	0.52	0.52	0.51	0.53	0.52	0.52	0.55	0.55	0.55	0.55	0.56	0.56	0.54	0.53	0.54	0.53	0.53	0.54	0.54	0.55	0.55	0.54	0.54	0.54	0.54	0.54	0.55	0.55	0.54	0.55	0.54	0.54
Novosphingobium gossypii CCM 8569	0.52	0.53	0.53	0.53	0.53	0.52	0.52	0.52	0.53	0.52	0.52	0.52	0.52	0.52	0.52	0.53	0.53	0.52	0.51	0.51	0.52	0.52	0.52	0.54	0.55	0.55	0.55	0.56	0.56	0.54	0.54	0.53	0.53	0.54	0.54	0.55	0.54	0.54	0.54	0.54	0.54	0.54	0.54	0.55	0.54	0.54	0.54	0.54	0.54
Novosphingobium guangzhouense SA925	0.51	0.53	0.53	0.53	0.53	0.51	0.52	0.52	0.53	0.52	0.51	0.52	0.52	0.52	0.52	0.52	0.52	0.52	0.51	0.51	0.52	0.52	0.52	0.54	0.55	0.55	0.54	0.56	0.56	0.54	0.53	0.53	0.53	0.54	0.54	0.54	0.54	0.54	0.54	0.54	0.54	0.54	0.53	0.54	0.54	0.53	0.55	0.54	0.54
Novosphingobium resinovorum VKM B-1172	0.52	0.53	0.52	0.53	0.54	0.52	0.52	0.52	0.53	0.53	0.52	0.52	0.52	0.52	0.53	0.53	0.52	0.53	0.51	0.52	0.53	0.52	0.53	0.55	0.55	0.55	0.54	0.56	0.56	0.55	0.54	0.54	0.54	0.54	0.54	0.55	0.54	0.55	0.55	0.55	0.54	0.54	0.54	0.55	0.55	0.54	0.55	0.54	0.54
Croceicoccus hydrothermalis JLT1	0.51	0.53	0.56	0.53	0.54	0.52	0.52	0.52	0.52	0.53	0.52	0.52	0.52	0.53	0.53	0.52	0.53	0.52	0.52	0.52	0.53	0.53	0.53	0.55	0.56	0.56	0.54	0.56	0.56	0.56	0.54	0.54	0.55	0.54	0.55	0.55	0.55	0.55	0.55	0.54	0.54	0.54	0.54	0.55	0.54	0.54	0.55	0.54	0.54
Croceicoccus mobilis Ery22	0.51	0.53	0.53	0.52	0.53	0.51	0.52	0.51	0.51	0.52	0.51	0.51	0.51	0.52	0.52	0.52	0.52	0.52	0.51	0.52	0.52	0.52	0.52	0.54	0.55	0.55	0.53	0.55	0.56	0.55	0.54	0.54	0.54	0.54	0.54	0.55	0.54	0.55	0.54	0.53	0.54	0.53	0.54	0.54	0.54	0.53	0.55	0.54	0.54
Croceicoccus marinus E4A9	0.51	0.53	0.54	0.53	0.54	0.52	0.52	0.52	0.52	0.52	0.52	0.52	0.52	0.52	0.53	0.52	0.53	0.52	0.52	0.52	0.52	0.52	0.53	0.55	0.55	0.55	0.54	0.56	0.56	0.55	0.54	0.54	0.54	0.54	0.55	0.55	0.55	0.55	0.54	0.54	0.54	0.54	0.54	0.54	0.54	0.54	0.55	0.55	0.54
Croceicoccus ponticola GM-16	0.51	0.53	0.53	0.54	0.54	0.52	0.53	0.52	0.52	0.53	0.52	0.53	0.53	0.53	0.53	0.53	0.53	0.53	0.52	0.52	0.53	0.53	0.53	0.55	0.56	0.56	0.54	0.56	0.56	0.55	0.54	0.54	0.54	0.54	0.54	0.55	0.55	0.55	0.55	0.54	0.54	0.54	0.54	0.55	0.54	0.54	0.55	0.55	0.54
Croceicoccus naphthovorans PQ-2	0.52	0.54	0.54	0.54	0.54	0.53	0.52	0.53	0.53	0.52	0.51	0.53	0.52	0.52	0.53	0.52	0.52	0.53	0.52	0.52	0.53	0.52	0.53	0.55	0.56	0.56	0.54	0.56	0.56	0.55	0.54	0.54	0.54	0.54	0.55	0.55	0.55	0.55	0.54	0.53	0.54	0.54	0.54	0.54	0.54	0.53	0.55	0.54	0.54
Croceicoccus bisphenolivorans H4	0.51	0.53	0.54	0.53	0.54	0.52	0.53	0.52	0.52	0.53	0.51	0.52	0.52	0.53	0.53	0.52	0.53	0.52	0.52	0.52	0.53	0.52	0.53	0.55	0.56	0.56	0.54	0.56	0.56	0.55	0.54	0.54	0.54	0.54	0.55	0.55	0.55	0.55	0.54	0.54	0.54	0.54	0.54	0.55	0.54	0.54	0.55	0.55	0.54
Croceicoccus sediminis S2-4-2	0.51	0.53	0.53	0.53	0.54	0.52	0.52	0.52	0.51	0.52	0.51	0.52	0.52	0.52	0.53	0.52	0.52	0.52	0.51	0.52	0.53	0.52	0.53	0.55	0.56	0.55	0.53	0.56	0.56	0.55	0.54	0.54	0.54	0.54	0.55	0.55	0.55	0.55	0.55	0.54	0.54	0.54	0.54	0.54	0.54	0.54	0.55	0.54	0.54
Croceicoccus pelagius Ery9	0.51	0.53	0.54	0.54	0.54	0.52	0.52	0.52	0.52	0.53	0.51	0.53	0.52	0.53	0.53	0.53	0.52	0.52	0.52	0.52	0.53	0.53	0.53	0.55	0.56	0.56	0.54	0.56	0.56	0.55	0.54	0.55	0.54	0.54	0.55	0.55	0.55	0.55	0.55	0.54	0.54	0.54	0.54	0.55	0.54	0.54	0.55	0.55	0.54
Croceicoccus gelatinilyticus 1NDH52	0.51	0.53	0.54	0.53	0.53	0.51	0.52	0.51	0.52	0.52	0.51	0.52	0.52	0.52	0.52	0.52	0.52	0.52	0.51	0.51	0.52	0.52	0.52	0.54	0.55	0.55	0.53	0.56	0.56	0.55	0.54	0.54	0.54	0.54	0.54	0.55	0.54	0.55	0.54	0.53	0.54	0.53	0.53	0.54	0.54	0.54	0.55	0.54	0.54
Altererythrobacter fulvus KACC 19119	0.51	0.53	0.53	0.54	0.54	0.52	0.52	0.52	0.52	0.53	0.52	0.52	0.52	0.53	0.53	0.53	0.52	0.52	0.52	0.52	0.53	0.53	0.53	0.55	0.56	0.56	0.54	0.57	0.57	0.55	0.54	0.54	0.54	0.54	0.55	0.55	0.55	0.56	0.55	0.55	0.55	0.55	0.55	0.55	0.55	0.54	0.56	0.55	0.55
Caenibius tardaugens NBRC 16725	0.52	0.54	0.53	0.54	0.55	0.52	0.53	0.54	0.53	0.53	0.51	0.53	0.52	0.53	0.53	0.52	0.53	0.52	0.52	0.52	0.53	0.52	0.53	0.55	0.56	0.56	0.54	0.57	0.57	0.55	0.54	0.54	0.54	0.54	0.55	0.56	0.55	0.55	0.55	0.54	0.55	0.55	0.54	0.55	0.54	0.54	0.55	0.55	0.55
Croceicoccus estronivorus MH-B5	0.52	0.54	0.53	0.54	0.54	0.52	0.53	0.53	0.53	0.53	0.51	0.52	0.52	0.53	0.53	0.52	0.52	0.52	0.52	0.52	0.53	0.52	0.53	0.56	0.56	0.56	0.54	0.57	0.56	0.56	0.54	0.54	0.54	0.55	0.55	0.55	0.55	0.55	0.55	0.54	0.55	0.54	0.54	0.55	0.54	0.54	0.55	0.55	0.55
Altericroceibacterium endophyticum LMG 29518	0.51	0.52	0.53	0.53	0.53	0.51	0.51	0.52	0.52	0.52	0.51	0.51	0.52	0.52	0.52	0.52	0.51	0.51	0.51	0.51	0.52	0.52	0.52	0.55	0.55	0.55	0.53	0.56	0.55	0.55	0.54	0.54	0.53	0.54	0.54	0.54	0.54	0.54	0.54	0.54	0.54	0.53	0.53	0.54	0.54	0.54	0.54	0.54	0.54
Altericroceibacterium spongiae HN-Y73	0.51	0.52	0.53	0.52	0.53	0.51	0.52	0.52	0.52	0.52	0.51	0.51	0.52	0.52	0.52	0.52	0.51	0.51	0.51	0.51	0.52	0.52	0.52	0.54	0.55	0.55	0.53	0.55	0.55	0.55	0.53	0.54	0.53	0.53	0.54	0.54	0.54	0.55	0.54	0.53	0.54	0.53	0.53	0.54	0.54	0.53	0.54	0.53	0.53
Altericroceibacterium indicum DSM 18604	0.51	0.53	0.53	0.53	0.53	0.51	0.51	0.52	0.52	0.52	0.51	0.51	0.52	0.52	0.52	0.52	0.52	0.52	0.51	0.51	0.52	0.52	0.52	0.55	0.55	0.55	0.54	0.56	0.56	0.55	0.54	0.54	0.54	0.54	0.54	0.55	0.54	0.54	0.54	0.54	0.54	0.53	0.54	0.54	0.54	0.54	0.55	0.54	0.54
Croceibacterium salegens MCCC 1K01500	0.51	0.52	0.53	0.53	0.53	0.52	0.52	0.51	0.52	0.52	0.51	0.51	0.52	0.52	0.53	0.52	0.52	0.51	0.51	0.51	0.53	0.53	0.52	0.55	0.55	0.55	0.54	0.56	0.56	0.55	0.54	0.54	0.54	0.54	0.55	0.55	0.55	0.55	0.55	0.54	0.54	0.54	0.54	0.54	0.55	0.54	0.55	0.55	0.54
Croceibacterium soli MCCC 1K02066	0.52	0.54	0.54	0.54	0.54	0.53	0.53	0.52	0.52	0.53	0.52	0.52	0.53	0.54	0.54	0.54	0.53	0.53	0.52	0.53	0.54	0.53	0.53	0.56	0.57	0.57	0.56	0.57	0.57	0.56	0.55	0.55	0.55	0.55	0.56	0.56	0.56	0.56	0.56	0.55	0.56	0.55	0.55	0.56	0.56	0.55	0.56	0.56	0.56
Croceibacterium atlanticum 26DY36	0.51	0.53	0.54	0.53	0.54	0.52	0.52	0.52	0.52	0.52	0.51	0.52	0.52	0.52	0.53	0.52	0.52	0.52	0.52	0.51	0.52	0.52	0.52	0.55	0.56	0.56	0.54	0.56	0.56	0.55	0.54	0.54	0.54	0.54	0.55	0.55	0.55	0.55	0.54	0.54	0.54	0.54	0.54	0.55	0.55	0.54	0.55	0.54	0.54
Croceibacterium xixiisoli S36	0.51	0.53	0.52	0.53	0.53	0.52	0.52	0.53	0.52	0.52	0.51	0.51	0.52	0.52	0.52	0.52	0.52	0.52	0.51	0.51	0.52	0.52	0.52	0.54	0.55	0.55	0.54	0.56	0.56	0.55	0.54	0.53	0.53	0.54	0.54	0.55	0.55	0.55	0.54	0.54	0.54	0.53	0.54	0.54	0.54	0.53	0.55	0.54	0.54
Croceibacterium mercuriale Coronado	0.52	0.54	0.54	0.53	0.53	0.52	0.53	0.52	0.52	0.53	0.53	0.52	0.53	0.53	0.53	0.53	0.54	0.53	0.52	0.52	0.53	0.53	0.53	0.55	0.56	0.55	0.56	0.56	0.56	0.55	0.54	0.54	0.54	0.54	0.55	0.55	0.55	0.55	0.54	0.55	0.55	0.54	0.55	0.55	0.55	0.54	0.55	0.54	0.55
Croceibacterium ferulae SX2RGS8	0.52	0.53	0.53	0.53	0.53	0.52	0.53	0.53	0.52	0.53	0.53	0.52	0.53	0.53	0.53	0.53	0.54	0.53	0.52	0.52	0.53	0.52	0.53	0.55	0.56	0.56	0.56	0.56	0.56	0.55	0.54	0.54	0.54	0.54	0.55	0.55	0.55	0.55	0.55	0.55	0.55	0.54	0.55	0.55	0.55	0.54	0.55	0.55	0.55
Paraurantiacibacter namhicola JCM 16345	0.51	0.53	0.54	0.54	0.54	0.53	0.53	0.52	0.52	0.53	0.52	0.52	0.53	0.53	0.53	0.53	0.52	0.52	0.52	0.53	0.53	0.53	0.53	0.56	0.56	0.56	0.54	0.56	0.56	0.56	0.55	0.55	0.55	0.55	0.56	0.55	0.55	0.56	0.55	0.54	0.55	0.54	0.54	0.55	0.54	0.54	0.55	0.55	0.54
Alteraurantiacibacter aestuarii JCM 16339	0.51	0.53	0.52	0.53	0.53	0.52	0.52	0.51	0.51	0.52	0.51	0.52	0.52	0.52	0.53	0.52	0.52	0.52	0.51	0.52	0.53	0.53	0.52	0.55	0.55	0.55	0.53	0.56	0.56	0.55	0.54	0.54	0.53	0.54	0.54	0.54	0.55	0.55	0.54	0.53	0.54	0.54	0.54	0.54	0.54	0.54	0.55	0.54	0.54
Alteraurantiacibacter aquimixticola SSKS-13	0.5	0.53	0.52	0.52	0.53	0.51	0.51	0.51	0.51	0.52	0.51	0.51	0.51	0.52	0.52	0.52	0.51	0.51	0.51	0.51	0.52	0.52	0.52	0.54	0.55	0.55	0.53	0.55	0.56	0.55	0.54	0.54	0.54	0.54	0.55	0.54	0.54	0.54	0.54	0.53	0.54	0.53	0.53	0.54	0.54	0.53	0.54	0.54	0.54
Alteraurantiacibacter buctensis M0322	0.5	0.52	0.52	0.52	0.53	0.51	0.52	0.51	0.52	0.52	0.51	0.51	0.52	0.52	0.53	0.52	0.52	0.52	0.51	0.52	0.53	0.52	0.53	0.54	0.55	0.55	0.53	0.55	0.55	0.55	0.53	0.54	0.53	0.54	0.54	0.55	0.54	0.55	0.54	0.54	0.54	0.53	0.54	0.54	0.54	0.53	0.54	0.54	0.54
Altererythrobacter palmitatis KCTC 52607	0.51	0.53	0.52	0.53	0.54	0.52	0.53	0.52	0.53	0.53	0.52	0.52	0.52	0.52	0.53	0.52	0.52	0.52	0.51	0.53	0.53	0.53	0.53	0.55	0.56	0.55	0.54	0.55	0.56	0.55	0.54	0.54	0.54	0.54	0.55	0.55	0.55	0.55	0.55	0.54	0.55	0.54	0.54	0.55	0.54	0.54	0.55	0.54	0.54
Altererythrobacter lauratis KCTC 52606	0.51	0.53	0.52	0.53	0.54	0.52	0.53	0.52	0.52	0.53	0.52	0.52	0.52	0.52	0.53	0.52	0.52	0.52	0.52	0.53	0.53	0.53	0.53	0.55	0.55	0.55	0.54	0.56	0.56	0.55	0.54	0.54	0.54	0.54	0.55	0.55	0.55	0.55	0.55	0.54	0.54	0.54	0.54	0.55	0.54	0.54	0.55	0.54	0.54
Aurantiacibacter suaedae GH3-15	0.5	0.52	0.53	0.52	0.52	0.51	0.51	0.51	0.51	0.52	0.51	0.51	0.52	0.52	0.53	0.52	0.52	0.52	0.51	0.51	0.52	0.52	0.52	0.54	0.55	0.55	0.53	0.55	0.55	0.55	0.54	0.54	0.54	0.54	0.55	0.54	0.54	0.54	0.54	0.53	0.53	0.53	0.54	0.54	0.54	0.53	0.54	0.54	0.54
Aurantiacibacter xanthus CCTCC AB 2015396	0.51	0.52	0.53	0.52	0.53	0.51	0.51	0.52	0.51	0.52	0.51	0.51	0.51	0.52	0.52	0.52	0.52	0.51	0.51	0.51	0.52	0.52	0.52	0.54	0.55	0.55	0.53	0.55	0.55	0.55	0.54	0.53	0.53	0.53	0.54	0.54	0.54	0.54	0.53	0.53	0.53	0.53	0.53	0.54	0.54	0.53	0.54	0.54	0.54
Aurantiacibacter spongiae HN-E23	0.51	0.54	0.54	0.53	0.53	0.52	0.53	0.52	0.52	0.53	0.52	0.52	0.53	0.53	0.53	0.53	0.53	0.53	0.52	0.52	0.53	0.52	0.52	0.55	0.56	0.56	0.54	0.56	0.56	0.56	0.55	0.55	0.55	0.55	0.55	0.55	0.55	0.55	0.54	0.54	0.54	0.54	0.54	0.54	0.54	0.54	0.55	0.55	0.54
Aurantiacibacter gangjinensis CGMCC 1.15024	0.51	0.53	0.53	0.53	0.53	0.52	0.52	0.52	0.51	0.52	0.51	0.52	0.52	0.53	0.53	0.52	0.52	0.52	0.51	0.53	0.52	0.52	0.52	0.55	0.55	0.55	0.54	0.56	0.56	0.55	0.55	0.55	0.54	0.55	0.55	0.54	0.54	0.55	0.54	0.54	0.54	0.54	0.54	0.54	0.54	0.54	0.55	0.54	0.54
Aurantiacibacter rhizosphaerae GH3-10	0.5	0.52	0.52	0.53	0.52	0.51	0.51	0.51	0.5	0.51	0.51	0.51	0.51	0.51	0.52	0.52	0.51	0.51	0.51	0.51	0.52	0.51	0.51	0.54	0.55	0.55	0.53	0.55	0.55	0.55	0.54	0.54	0.54	0.54	0.54	0.54	0.54	0.54	0.54	0.53	0.53	0.53	0.53	0.54	0.53	0.53	0.54	0.54	0.54
Aurantiacibacter odishensis KCTC 23981	0.5	0.52	0.53	0.52	0.53	0.52	0.52	0.51	0.51	0.52	0.51	0.52	0.52	0.52	0.53	0.52	0.52	0.52	0.51	0.51	0.53	0.52	0.52	0.54	0.55	0.55	0.53	0.56	0.56	0.56	0.55	0.55	0.54	0.55	0.55	0.55	0.54	0.55	0.55	0.54	0.54	0.54	0.54	0.55	0.54	0.54	0.55	0.54	0.54
Aurantiacibacter zhengii V18	0.5	0.52	0.54	0.52	0.53	0.51	0.52	0.51	0.51	0.52	0.51	0.51	0.51	0.52	0.52	0.52	0.52	0.51	0.51	0.51	0.52	0.51	0.52	0.54	0.55	0.55	0.53	0.55	0.56	0.55	0.55	0.55	0.55	0.55	0.55	0.54	0.54	0.55	0.54	0.54	0.54	0.53	0.54	0.54	0.54	0.53	0.54	0.54	0.54
Aurantiacibacter arachoides RC4-10-4	0.51	0.53	0.54	0.53	0.53	0.52	0.52	0.52	0.52	0.53	0.52	0.53	0.53	0.53	0.53	0.53	0.53	0.52	0.52	0.52	0.53	0.52	0.53	0.55	0.56	0.56	0.54	0.56	0.56	0.56	0.54	0.55	0.55	0.55	0.55	0.55	0.55	0.55	0.55	0.55	0.55	0.55	0.55	0.55	0.54	0.54	0.55	0.55	0.55
Aurantiacibacter luteus KA37	0.51	0.53	0.53	0.53	0.53	0.52	0.53	0.52	0.52	0.53	0.52	0.52	0.53	0.53	0.53	0.53	0.53	0.53	0.52	0.52	0.53	0.53	0.53	0.56	0.56	0.56	0.55	0.56	0.57	0.55	0.55	0.55	0.55	0.55	0.56	0.55	0.55	0.55	0.55	0.55	0.55	0.55	0.55	0.55	0.55	0.54	0.55	0.55	0.55
Aurantiacibacter aquimixticola JSSK-14	0.51	0.53	0.53	0.53	0.53	0.53	0.53	0.52	0.52	0.53	0.51	0.52	0.52	0.53	0.53	0.53	0.52	0.52	0.52	0.53	0.53	0.52	0.52	0.55	0.56	0.56	0.54	0.56	0.56	0.56	0.55	0.55	0.55	0.55	0.55	0.55	0.55	0.55	0.55	0.54	0.54	0.54	0.54	0.55	0.54	0.54	0.55	0.55	0.54
Aurantiacibacter sediminis JGD-13	0.51	0.53	0.53	0.53	0.53	0.52	0.52	0.51	0.52	0.53	0.51	0.52	0.52	0.53	0.53	0.52	0.52	0.52	0.51	0.52	0.52	0.52	0.52	0.55	0.55	0.55	0.54	0.56	0.56	0.55	0.54	0.55	0.54	0.54	0.55	0.54	0.54	0.54	0.54	0.53	0.54	0.54	0.54	0.54	0.54	0.54	0.54	0.54	0.54
Aurantiacibacter atlanticus s21-N3	0.5	0.52	0.53	0.52	0.53	0.51	0.51	0.51	0.51	0.52	0.51	0.51	0.51	0.52	0.52	0.51	0.51	0.51	0.51	0.51	0.52	0.51	0.52	0.54	0.55	0.55	0.53	0.55	0.55	0.55	0.54	0.54	0.54	0.54	0.54	0.54	0.54	0.54	0.53	0.53	0.53	0.53	0.53	0.54	0.54	0.53	0.54	0.54	0.54
Aurantiacibacter marinus KCTC 23554	0.51	0.53	0.53	0.53	0.53	0.52	0.52	0.52	0.52	0.52	0.51	0.52	0.52	0.53	0.53	0.52	0.52	0.52	0.52	0.52	0.53	0.52	0.53	0.55	0.55	0.55	0.54	0.56	0.56	0.55	0.54	0.54	0.54	0.54	0.54	0.54	0.54	0.54	0.55	0.54	0.54	0.53	0.54	0.55	0.54	0.54	0.55	0.54	0.54
Blastomonas marina CGMCC 1.15297	0.51	0.54	0.54	0.54	0.54	0.52	0.53	0.52	0.52	0.53	0.51	0.52	0.53	0.53	0.53	0.53	0.52	0.52	0.51	0.52	0.52	0.52	0.53	0.56	0.56	0.56	0.55	0.56	0.56	0.56	0.56	0.55	0.56	0.56	0.56	0.56	0.55	0.56	0.55	0.55	0.55	0.55	0.55	0.55	0.55	0.55	0.55	0.55	0.55
Alteriqipengyuania halimionae LMG 29519	0.51	0.53	0.53	0.53	0.53	0.52	0.52	0.51	0.51	0.52	0.51	0.52	0.52	0.52	0.53	0.52	0.52	0.52	0.51	0.52	0.52	0.52	0.52	0.55	0.56	0.56	0.54	0.56	0.56	0.56	0.55	0.55	0.55	0.55	0.56	0.55	0.55	0.55	0.55	0.54	0.55	0.55	0.54	0.55	0.54	0.54	0.55	0.55	0.55
Pelagerythrobacter rhizovicinus AY-3R	0.52	0.55	0.55	0.54	0.54	0.53	0.53	0.53	0.53	0.54	0.52	0.53	0.53	0.54	0.54	0.54	0.53	0.53	0.52	0.53	0.54	0.53	0.53	0.56	0.57	0.58	0.56	0.57	0.58	0.57	0.55	0.56	0.55	0.56	0.56	0.57	0.56	0.57	0.56	0.55	0.56	0.55	0.55	0.56	0.56	0.56	0.56	0.56	0.56
Pelagerythrobacter aerophilus Ery1	0.52	0.54	0.55	0.54	0.55	0.53	0.53	0.53	0.53	0.53	0.52	0.53	0.53	0.53	0.54	0.53	0.53	0.53	0.52	0.53	0.53	0.53	0.53	0.56	0.57	0.57	0.55	0.57	0.57	0.56	0.55	0.55	0.55	0.55	0.56	0.56	0.56	0.56	0.55	0.55	0.55	0.55	0.55	0.56	0.55	0.55	0.56	0.56	0.55
Pelagerythrobacter marinus H32	0.52	0.55	0.55	0.54	0.55	0.54	0.54	0.53	0.53	0.54	0.53	0.53	0.54	0.54	0.54	0.54	0.54	0.53	0.53	0.54	0.54	0.53	0.54	0.57	0.57	0.57	0.55	0.57	0.57	0.57	0.56	0.56	0.56	0.56	0.57	0.57	0.56	0.56	0.56	0.55	0.56	0.56	0.55	0.56	0.55	0.55	0.56	0.56	0.56
Pelagerythrobacter marensis KCTC 22370	0.52	0.54	0.55	0.54	0.54	0.53	0.53	0.53	0.53	0.54	0.52	0.53	0.53	0.54	0.54	0.54	0.53	0.53	0.52	0.53	0.54	0.53	0.53	0.56	0.57	0.57	0.55	0.57	0.57	0.57	0.55	0.56	0.55	0.56	0.56	0.56	0.56	0.56	0.55	0.55	0.56	0.55	0.55	0.56	0.55	0.55	0.56	0.56	0.55
Tsuneonella mangrovi C9-11	0.52	0.54	0.54	0.54	0.54	0.53	0.54	0.53	0.53	0.54	0.53	0.53	0.53	0.54	0.54	0.53	0.53	0.53	0.53	0.53	0.54	0.53	0.53	0.56	0.57	0.57	0.55	0.57	0.57	0.56	0.55	0.55	0.55	0.55	0.56	0.56	0.56	0.56	0.56	0.55	0.55	0.55	0.55	0.56	0.55	0.55	0.56	0.55	0.55
Tsuneonella flava MS1-4	0.52	0.54	0.54	0.54	0.54	0.53	0.53	0.53	0.53	0.54	0.52	0.53	0.53	0.53	0.53	0.53	0.53	0.53	0.53	0.53	0.53	0.53	0.53	0.56	0.56	0.56	0.54	0.56	0.57	0.56	0.55	0.55	0.55	0.55	0.55	0.56	0.55	0.56	0.55	0.55	0.55	0.54	0.55	0.55	0.55	0.55	0.56	0.55	0.55
Tsuneonella suprasediminis Ery12	0.52	0.54	0.54	0.54	0.54	0.53	0.53	0.53	0.52	0.53	0.52	0.53	0.53	0.53	0.53	0.53	0.53	0.53	0.53	0.53	0.53	0.53	0.53	0.55	0.56	0.56	0.54	0.57	0.57	0.56	0.54	0.55	0.55	0.55	0.55	0.56	0.55	0.56	0.55	0.55	0.55	0.55	0.54	0.55	0.54	0.55	0.56	0.55	0.55
Tsuneonella amylolytica NS1	0.51	0.55	0.54	0.54	0.54	0.53	0.54	0.53	0.53	0.54	0.53	0.53	0.54	0.54	0.54	0.54	0.54	0.54	0.53	0.53	0.54	0.54	0.54	0.57	0.57	0.57	0.55	0.57	0.57	0.56	0.55	0.55	0.55	0.55	0.56	0.56	0.56	0.56	0.56	0.55	0.55	0.56	0.56	0.56	0.55	0.55	0.56	0.56	0.55
Tsuneonella troitsensis JCM 17037	0.51	0.54	0.54	0.54	0.54	0.54	0.54	0.53	0.53	0.54	0.53	0.53	0.53	0.54	0.54	0.54	0.54	0.54	0.53	0.53	0.54	0.54	0.54	0.56	0.57	0.57	0.55	0.57	0.57	0.56	0.55	0.55	0.55	0.55	0.56	0.57	0.56	0.57	0.56	0.55	0.56	0.55	0.56	0.56	0.55	0.55	0.56	0.56	0.56
Tsuneonella dongtanensis KCTC 22672	0.51	0.54	0.54	0.54	0.54	0.53	0.54	0.52	0.52	0.54	0.52	0.52	0.53	0.54	0.54	0.54	0.53	0.53	0.53	0.54	0.54	0.54	0.54	0.56	0.57	0.57	0.55	0.56	0.57	0.56	0.55	0.55	0.55	0.55	0.56	0.56	0.55	0.56	0.55	0.55	0.55	0.55	0.55	0.56	0.55	0.55	0.56	0.55	0.55
Tsuneonella aeria 100921-2	0.52	0.55	0.54	0.54	0.54	0.53	0.54	0.53	0.53	0.54	0.53	0.53	0.53	0.54	0.54	0.54	0.54	0.53	0.53	0.53	0.54	0.54	0.54	0.56	0.57	0.57	0.55	0.57	0.57	0.56	0.55	0.55	0.55	0.55	0.55	0.57	0.56	0.56	0.56	0.55	0.56	0.55	0.55	0.56	0.55	0.56	0.56	0.56	0.56
Tsuneonella rigui KCTC 42620	0.52	0.55	0.54	0.54	0.54	0.53	0.54	0.53	0.53	0.54	0.52	0.53	0.53	0.54	0.54	0.54	0.53	0.53	0.53	0.53	0.54	0.54	0.54	0.57	0.57	0.57	0.55	0.58	0.57	0.56	0.55	0.55	0.55	0.55	0.56	0.56	0.56	0.56	0.56	0.55	0.55	0.55	0.55	0.56	0.55	0.55	0.56	0.56	0.56
Tsuneonella deserti CGMCC 1.15959	0.52	0.55	0.54	0.55	0.55	0.54	0.54	0.53	0.54	0.54	0.53	0.54	0.53	0.54	0.54	0.54	0.54	0.53	0.53	0.54	0.54	0.54	0.54	0.57	0.57	0.57	0.56	0.57	0.58	0.56	0.55	0.55	0.55	0.55	0.56	0.57	0.56	0.56	0.56	0.56	0.56	0.56	0.56	0.56	0.56	0.56	0.57	0.56	0.56
Alteripontixanthobacter maritimus HME9302	0.51	0.53	0.53	0.53	0.53	0.52	0.52	0.52	0.52	0.53	0.52	0.52	0.52	0.53	0.53	0.53	0.53	0.52	0.52	0.52	0.53	0.52	0.53	0.55	0.56	0.56	0.54	0.56	0.56	0.56	0.55	0.55	0.55	0.55	0.55	0.55	0.55	0.55	0.55	0.54	0.54	0.54	0.54	0.55	0.54	0.54	0.55	0.55	0.54
Alteripontixanthobacter muriae SALINAS58	0.51	0.54	0.54	0.54	0.54	0.53	0.53	0.52	0.52	0.53	0.52	0.53	0.53	0.53	0.53	0.53	0.53	0.53	0.52	0.52	0.53	0.52	0.53	0.56	0.56	0.56	0.55	0.57	0.57	0.55	0.55	0.55	0.54	0.55	0.55	0.55	0.55	0.55	0.54	0.54	0.55	0.54	0.54	0.55	0.54	0.54	0.55	0.55	0.54
Pseudopontixanthobacter vadosimaris JL3514	0.51	0.54	0.55	0.54	0.54	0.53	0.53	0.53	0.53	0.54	0.53	0.53	0.53	0.54	0.54	0.54	0.53	0.53	0.53	0.53	0.54	0.53	0.53	0.56	0.56	0.56	0.55	0.57	0.57	0.56	0.55	0.55	0.55	0.55	0.56	0.56	0.56	0.55	0.55	0.55	0.55	0.55	0.55	0.55	0.55	0.55	0.55	0.55	0.55
Altererythrobacter aquiaggeris NBRC 112425	0.51	0.54	0.54	0.53	0.53	0.53	0.53	0.52	0.52	0.53	0.52	0.52	0.53	0.53	0.53	0.53	0.53	0.53	0.52	0.53	0.53	0.53	0.53	0.55	0.56	0.56	0.54	0.56	0.56	0.56	0.55	0.55	0.55	0.54	0.55	0.55	0.55	0.55	0.54	0.54	0.54	0.54	0.54	0.55	0.54	0.54	0.55	0.54	0.54
Pontixanthobacter confluentis KCTC 52259	0.51	0.54	0.53	0.54	0.54	0.52	0.53	0.52	0.52	0.54	0.52	0.52	0.53	0.53	0.53	0.53	0.53	0.53	0.52	0.52	0.53	0.53	0.53	0.55	0.56	0.56	0.54	0.57	0.57	0.56	0.55	0.55	0.55	0.55	0.55	0.55	0.55	0.56	0.55	0.54	0.55	0.55	0.54	0.55	0.54	0.54	0.55	0.55	0.55
Pontixanthobacter sediminis KCTC 42453	0.51	0.54	0.53	0.53	0.54	0.52	0.52	0.52	0.52	0.53	0.52	0.53	0.53	0.53	0.54	0.53	0.53	0.53	0.52	0.52	0.53	0.53	0.53	0.55	0.56	0.56	0.55	0.56	0.56	0.56	0.55	0.55	0.55	0.55	0.55	0.55	0.55	0.56	0.55	0.54	0.55	0.54	0.55	0.55	0.55	0.55	0.55	0.55	0.54
Alteriqipengyuania abyssalis NZ-12B	0.5	0.53	0.54	0.53	0.53	0.52	0.53	0.52	0.52	0.53	0.51	0.52	0.52	0.53	0.53	0.53	0.52	0.52	0.52	0.52	0.53	0.52	0.53	0.55	0.55	0.55	0.53	0.56	0.56	0.56	0.54	0.54	0.54	0.55	0.55	0.55	0.55	0.55	0.55	0.54	0.54	0.54	0.54	0.55	0.54	0.54	0.55	0.54	0.54
Alteriqipengyuania lutimaris S-5	0.51	0.53	0.53	0.53	0.53	0.52	0.52	0.51	0.52	0.53	0.52	0.52	0.52	0.53	0.53	0.53	0.52	0.52	0.51	0.51	0.52	0.52	0.52	0.55	0.55	0.55	0.54	0.56	0.56	0.56	0.55	0.55	0.54	0.55	0.55	0.55	0.55	0.55	0.55	0.54	0.54	0.54	0.54	0.55	0.54	0.54	0.55	0.55	0.54
Parerythrobacter jejuensis JCM 16677	0.5	0.53	0.53	0.53	0.53	0.52	0.53	0.52	0.52	0.53	0.51	0.52	0.52	0.53	0.53	0.52	0.53	0.52	0.52	0.52	0.53	0.53	0.53	0.55	0.56	0.56	0.53	0.56	0.56	0.56	0.55	0.55	0.55	0.55	0.55	0.55	0.55	0.55	0.55	0.54	0.54	0.54	0.54	0.55	0.54	0.54	0.55	0.54	0.54
Parerythrobacter lutipelagi GH1-16	0.5	0.53	0.54	0.53	0.53	0.52	0.52	0.51	0.51	0.53	0.51	0.52	0.52	0.53	0.53	0.52	0.52	0.52	0.51	0.52	0.53	0.52	0.53	0.55	0.55	0.56	0.53	0.56	0.56	0.55	0.55	0.55	0.55	0.55	0.55	0.55	0.54	0.55	0.54	0.54	0.54	0.54	0.54	0.54	0.53	0.54	0.55	0.54	0.54
Pontixanthobacter luteolus SW-109	0.51	0.54	0.54	0.53	0.53	0.52	0.52	0.52	0.52	0.53	0.51	0.52	0.52	0.53	0.53	0.53	0.52	0.53	0.52	0.52	0.53	0.53	0.53	0.55	0.56	0.56	0.54	0.56	0.56	0.56	0.55	0.55	0.54	0.55	0.55	0.55	0.55	0.55	0.55	0.54	0.54	0.54	0.54	0.55	0.54	0.54	0.55	0.55	0.54
Pontixanthobacter gangjinensis JCM 17802	0.51	0.53	0.53	0.53	0.53	0.52	0.52	0.51	0.52	0.53	0.51	0.52	0.52	0.52	0.53	0.52	0.52	0.52	0.52	0.52	0.53	0.52	0.53	0.55	0.55	0.56	0.53	0.56	0.56	0.55	0.54	0.55	0.54	0.54	0.55	0.54	0.54	0.55	0.54	0.53	0.54	0.54	0.54	0.54	0.53	0.54	0.55	0.54	0.54
Pontixanthobacter rizhaonensis RZ02	0.51	0.53	0.53	0.53	0.53	0.52	0.52	0.52	0.51	0.53	0.51	0.51	0.52	0.52	0.53	0.52	0.53	0.52	0.51	0.52	0.53	0.52	0.53	0.55	0.56	0.56	0.54	0.56	0.56	0.55	0.55	0.55	0.54	0.54	0.55	0.54	0.54	0.55	0.54	0.53	0.54	0.53	0.53	0.54	0.54	0.53	0.54	0.54	0.53
Pontixanthobacter aquaemixtae KCTC 52763	0.51	0.53	0.53	0.53	0.53	0.51	0.52	0.51	0.51	0.53	0.51	0.51	0.52	0.53	0.53	0.52	0.52	0.52	0.51	0.52	0.53	0.52	0.52	0.54	0.55	0.56	0.53	0.56	0.56	0.56	0.55	0.55	0.54	0.55	0.55	0.55	0.54	0.55	0.54	0.53	0.54	0.54	0.54	0.54	0.53	0.54	0.55	0.54	0.54
Pontixanthobacter aestiaquae KCTC 42006	0.51	0.53	0.53	0.53	0.53	0.52	0.52	0.52	0.51	0.53	0.51	0.52	0.52	0.53	0.53	0.53	0.53	0.52	0.52	0.52	0.52	0.52	0.53	0.54	0.56	0.56	0.53	0.56	0.56	0.55	0.55	0.55	0.54	0.55	0.55	0.54	0.54	0.55	0.55	0.53	0.54	0.53	0.54	0.54	0.53	0.54	0.55	0.54	0.54
Altererythrobacter epoxidivorans CGMCC 1.7731	0.51	0.54	0.54	0.54	0.54	0.52	0.53	0.52	0.52	0.53	0.52	0.52	0.52	0.52	0.53	0.53	0.52	0.52	0.52	0.52	0.53	0.53	0.53	0.55	0.56	0.56	0.54	0.56	0.56	0.56	0.55	0.55	0.55	0.55	0.56	0.55	0.55	0.55	0.55	0.54	0.54	0.54	0.54	0.55	0.54	0.54	0.55	0.54	0.55
Altererythrobacter xiamenensis CGMCC 1.12494	0.51	0.53	0.54	0.53	0.53	0.52	0.53	0.51	0.52	0.53	0.51	0.52	0.52	0.52	0.53	0.52	0.52	0.52	0.51	0.52	0.53	0.53	0.53	0.55	0.56	0.56	0.53	0.56	0.56	0.56	0.55	0.55	0.55	0.55	0.55	0.55	0.55	0.55	0.54	0.54	0.54	0.54	0.54	0.55	0.54	0.54	0.55	0.55	0.54
Altererythrobacter lutimaris JGD-16	0.5	0.53	0.53	0.53	0.53	0.52	0.53	0.52	0.52	0.53	0.51	0.52	0.52	0.53	0.53	0.52	0.52	0.52	0.52	0.52	0.53	0.52	0.53	0.54	0.55	0.55	0.53	0.55	0.55	0.55	0.55	0.55	0.54	0.55	0.55	0.54	0.54	0.55	0.54	0.53	0.54	0.53	0.54	0.55	0.53	0.54	0.54	0.54	0.54
Altererythrobacter ishigakiensis NBRC 107699	0.51	0.54	0.54	0.53	0.53	0.53	0.53	0.52	0.52	0.53	0.52	0.52	0.53	0.53	0.53	0.53	0.53	0.52	0.52	0.53	0.53	0.53	0.53	0.55	0.56	0.56	0.54	0.56	0.56	0.56	0.55	0.55	0.55	0.55	0.55	0.55	0.55	0.55	0.55	0.54	0.54	0.54	0.54	0.55	0.54	0.54	0.55	0.54	0.54
Altererythrobacter insulae BPTF-M16	0.49	0.52	0.52	0.52	0.52	0.51	0.52	0.51	0.51	0.52	0.51	0.51	0.51	0.52	0.52	0.52	0.52	0.51	0.51	0.52	0.52	0.52	0.52	0.54	0.55	0.55	0.52	0.55	0.55	0.55	0.54	0.54	0.54	0.54	0.54	0.54	0.54	0.54	0.54	0.53	0.53	0.53	0.53	0.54	0.53	0.53	0.54	0.53	0.53
Erythrobacter litoralis DSM 8509	0.51	0.53	0.53	0.53	0.53	0.53	0.54	0.52	0.52	0.53	0.51	0.52	0.53	0.53	0.53	0.53	0.53	0.52	0.52	0.53	0.53	0.52	0.53	0.55	0.55	0.56	0.53	0.56	0.56	0.55	0.55	0.55	0.54	0.55	0.55	0.55	0.54	0.54	0.54	0.53	0.54	0.54	0.54	0.55	0.53	0.53	0.54	0.54	0.54
Erythrobacter aurantius C5	0.5	0.53	0.52	0.52	0.52	0.52	0.52	0.51	0.51	0.52	0.51	0.52	0.52	0.52	0.52	0.52	0.52	0.52	0.51	0.53	0.53	0.52	0.53	0.54	0.55	0.55	0.52	0.55	0.56	0.55	0.54	0.54	0.54	0.54	0.55	0.54	0.54	0.54	0.54	0.53	0.54	0.53	0.54	0.54	0.53	0.53	0.54	0.54	0.54
Erythrobacter longus DSM 6997	0.5	0.52	0.52	0.52	0.52	0.51	0.51	0.51	0.51	0.52	0.5	0.51	0.51	0.52	0.52	0.51	0.52	0.51	0.51	0.51	0.52	0.52	0.52	0.53	0.54	0.54	0.52	0.55	0.55	0.54	0.54	0.54	0.53	0.53	0.54	0.54	0.53	0.54	0.54	0.52	0.53	0.52	0.53	0.54	0.53	0.53	0.54	0.53	0.53
Erythrobacter ani WH131	0.5	0.52	0.53	0.52	0.52	0.52	0.52	0.51	0.51	0.52	0.51	0.51	0.52	0.52	0.53	0.52	0.52	0.52	0.51	0.52	0.52	0.52	0.52	0.54	0.55	0.55	0.52	0.55	0.55	0.55	0.54	0.54	0.54	0.54	0.54	0.54	0.54	0.54	0.54	0.53	0.53	0.53	0.53	0.54	0.53	0.53	0.54	0.53	0.53
Erythrobacter rubeus KMU-140	0.5	0.52	0.52	0.52	0.53	0.52	0.53	0.52	0.51	0.52	0.51	0.51	0.52	0.52	0.52	0.52	0.52	0.51	0.51	0.52	0.52	0.52	0.52	0.54	0.55	0.55	0.53	0.55	0.55	0.55	0.55	0.55	0.54	0.54	0.55	0.54	0.54	0.54	0.54	0.53	0.53	0.53	0.53	0.54	0.53	0.53	0.54	0.53	0.54
Erythrobacter crassostreae WH158	0.49	0.52	0.51	0.51	0.51	0.5	0.51	0.5	0.5	0.51	0.5	0.5	0.51	0.51	0.51	0.51	0.51	0.51	0.5	0.51	0.51	0.51	0.51	0.52	0.54	0.54	0.51	0.54	0.54	0.54	0.53	0.53	0.53	0.53	0.53	0.53	0.53	0.53	0.53	0.52	0.52	0.52	0.52	0.53	0.52	0.52	0.53	0.52	0.52
Erythrobacter insulae JBTF-M21	0.5	0.53	0.52	0.52	0.52	0.52	0.52	0.51	0.51	0.52	0.51	0.51	0.52	0.52	0.52	0.52	0.52	0.52	0.51	0.52	0.52	0.52	0.52	0.54	0.54	0.55	0.52	0.55	0.55	0.55	0.54	0.54	0.54	0.54	0.54	0.54	0.54	0.54	0.54	0.53	0.53	0.53	0.53	0.54	0.53	0.53	0.54	0.53	0.53
Erythrobacter tepidarius DSM 10594	0.52	0.54	0.53	0.54	0.54	0.54	0.54	0.53	0.53	0.54	0.52	0.53	0.54	0.54	0.54	0.53	0.53	0.53	0.53	0.54	0.54	0.54	0.54	0.55	0.56	0.56	0.54	0.56	0.56	0.56	0.55	0.55	0.55	0.55	0.55	0.55	0.55	0.55	0.55	0.54	0.55	0.55	0.55	0.56	0.54	0.54	0.55	0.55	0.54
Erythrobacter cryptus DSM 12079	0.52	0.54	0.54	0.54	0.54	0.54	0.55	0.53	0.53	0.54	0.53	0.54	0.54	0.54	0.54	0.54	0.54	0.54	0.53	0.55	0.55	0.54	0.54	0.56	0.56	0.56	0.54	0.57	0.57	0.56	0.55	0.55	0.55	0.56	0.56	0.56	0.56	0.56	0.56	0.55	0.55	0.55	0.55	0.56	0.55	0.55	0.56	0.55	0.55
Erythrobacter dokdonensis DSM 17193	0.51	0.54	0.53	0.53	0.53	0.53	0.54	0.52	0.52	0.53	0.52	0.53	0.53	0.54	0.54	0.53	0.53	0.53	0.53	0.53	0.54	0.54	0.54	0.55	0.56	0.56	0.53	0.56	0.56	0.56	0.55	0.55	0.55	0.55	0.55	0.55	0.55	0.55	0.55	0.54	0.55	0.54	0.55	0.56	0.54	0.54	0.55	0.54	0.54
Erythrobacter sanguineus JCM 20691	0.51	0.54	0.53	0.53	0.53	0.53	0.53	0.52	0.52	0.53	0.52	0.53	0.53	0.53	0.53	0.53	0.53	0.53	0.53	0.53	0.54	0.54	0.54	0.55	0.56	0.56	0.54	0.56	0.56	0.56	0.55	0.55	0.55	0.55	0.55	0.55	0.55	0.55	0.55	0.54	0.55	0.54	0.55	0.55	0.54	0.54	0.55	0.55	0.55
Erythrobacter ramosus JCM 10282	0.51	0.54	0.53	0.53	0.53	0.53	0.53	0.52	0.52	0.53	0.52	0.53	0.53	0.53	0.53	0.53	0.53	0.53	0.52	0.53	0.54	0.53	0.54	0.55	0.56	0.55	0.53	0.56	0.56	0.55	0.54	0.54	0.54	0.54	0.55	0.55	0.55	0.55	0.55	0.54	0.54	0.54	0.54	0.55	0.54	0.53	0.55	0.54	0.54
Erythrobacter donghaensis DSM 16220	0.51	0.54	0.53	0.53	0.53	0.53	0.53	0.52	0.52	0.53	0.52	0.52	0.53	0.53	0.53	0.53	0.53	0.53	0.52	0.53	0.54	0.53	0.54	0.55	0.55	0.56	0.53	0.56	0.56	0.56	0.55	0.55	0.54	0.55	0.55	0.55	0.55	0.55	0.55	0.54	0.54	0.54	0.54	0.55	0.54	0.54	0.55	0.54	0.54
Erythrobacter colymbi JCM 18338	0.51	0.53	0.53	0.53	0.53	0.53	0.53	0.52	0.53	0.53	0.52	0.52	0.52	0.53	0.53	0.53	0.53	0.53	0.52	0.53	0.54	0.53	0.53	0.55	0.55	0.55	0.53	0.55	0.56	0.55	0.54	0.54	0.54	0.54	0.55	0.55	0.55	0.55	0.55	0.54	0.54	0.54	0.54	0.55	0.54	0.53	0.55	0.54	0.54
Erythrobacter neustonensis DSM 9434	0.51	0.54	0.53	0.53	0.53	0.53	0.53	0.52	0.52	0.53	0.52	0.53	0.53	0.53	0.53	0.53	0.53	0.53	0.53	0.53	0.54	0.53	0.53	0.55	0.56	0.56	0.54	0.56	0.56	0.55	0.55	0.55	0.55	0.55	0.55	0.55	0.55	0.55	0.55	0.54	0.55	0.55	0.55	0.56	0.54	0.54	0.55	0.55	0.54
Qipengyuania oceanensis MCCC 1A09965	0.51	0.54	0.55	0.54	0.54	0.53	0.53	0.52	0.52	0.53	0.52	0.52	0.52	0.53	0.53	0.53	0.53	0.53	0.52	0.52	0.54	0.53	0.53	0.55	0.56	0.56	0.54	0.56	0.57	0.56	0.55	0.55	0.55	0.55	0.55	0.55	0.55	0.55	0.55	0.54	0.54	0.54	0.54	0.55	0.54	0.54	0.55	0.55	0.55
Parapontixanthobacter aurantiacus MCCC 1A09962	0.5096	0.5325	0.5386	0.5294	0.5302	0.5212	0.5223	0.5171	0.5173	0.5263	0.5144	0.5171	0.5184	0.5258	0.5243	0.5223	0.5232	0.5226	0.5163	0.5189	0.5267	0.5237	0.5283	0.5498	0.5569	0.5515	0.5409	0.5574	0.5596	0.5561	0.5449	0.5486	0.5459	0.5469	0.551	0.5487	0.5433	0.5515	0.5427	0.5371	0.5422	0.5362	0.5361	0.5427	0.5385	0.5405	0.5451	0.5434	0.5421
Actirhodobacter atriluteus HHU K3-1	0.5093	0.5372	0.5393	0.53	0.5328	0.5215	0.5229	0.5209	0.5201	0.5251	0.5175	0.5185	0.5217	0.5276	0.5288	0.5265	0.5248	0.5264	0.5185	0.5218	0.5276	0.5238	0.5301	0.5545	0.5565	0.5574	0.5434	0.5612	0.5616	0.5559	0.5466	0.5478	0.5452	0.5476	0.551	0.5513	0.5485	0.5513	0.5419	0.5414	0.5432	0.5355	0.5399	0.5428	0.5402	0.5432	0.5487	0.5453	0.5408
Qipengyuania sediminis CGMCC 1.12928	0.51	0.55	0.54	0.54	0.55	0.54	0.54	0.53	0.53	0.54	0.53	0.53	0.54	0.54	0.54	0.54	0.54	0.54	0.53	0.54	0.54	0.54	0.54	0.57	0.57	0.57	0.56	0.57	0.57	0.56	0.55	0.55	0.55	0.55	0.56	0.57	0.56	0.56	0.56	0.56	0.56	0.56	0.56	0.56	0.56	0.56	0.56	0.56	0.56
Qipengyuania algicida KEMB 9005-328	0.51	0.53	0.53	0.53	0.53	0.52	0.52	0.52	0.52	0.53	0.52	0.52	0.52	0.53	0.53	0.52	0.53	0.52	0.51	0.52	0.53	0.52	0.53	0.55	0.56	0.55	0.54	0.56	0.56	0.55	0.54	0.54	0.54	0.54	0.55	0.55	0.55	0.55	0.54	0.54	0.54	0.55	0.54	0.55	0.54	0.54	0.55	0.55	0.54
Qipengyuania marisflavi KEM-5	0.51	0.54	0.54	0.54	0.54	0.53	0.53	0.52	0.52	0.53	0.52	0.53	0.53	0.54	0.54	0.53	0.53	0.53	0.53	0.53	0.53	0.53	0.53	0.56	0.57	0.57	0.55	0.57	0.57	0.56	0.55	0.55	0.55	0.55	0.56	0.55	0.55	0.55	0.55	0.55	0.55	0.54	0.55	0.55	0.55	0.55	0.55	0.55	0.55
Qipengyuania pelagi JCM 17468	0.51	0.54	0.55	0.54	0.54	0.53	0.53	0.52	0.52	0.53	0.52	0.52	0.53	0.53	0.53	0.53	0.53	0.53	0.52	0.52	0.53	0.53	0.53	0.56	0.56	0.56	0.55	0.56	0.57	0.56	0.55	0.55	0.55	0.55	0.56	0.55	0.55	0.55	0.55	0.54	0.55	0.54	0.54	0.55	0.54	0.55	0.55	0.55	0.55
Qipengyuania proteolytica 6B39	0.51	0.53	0.53	0.53	0.53	0.53	0.53	0.51	0.52	0.53	0.52	0.52	0.52	0.53	0.53	0.53	0.53	0.53	0.52	0.53	0.53	0.53	0.53	0.55	0.56	0.56	0.54	0.56	0.56	0.56	0.55	0.55	0.55	0.55	0.56	0.55	0.55	0.56	0.55	0.54	0.54	0.54	0.54	0.55	0.54	0.54	0.55	0.55	0.55
Qipengyuania soli 6D36	0.51	0.54	0.53	0.54	0.53	0.53	0.53	0.52	0.52	0.54	0.52	0.53	0.52	0.53	0.53	0.53	0.53	0.53	0.52	0.53	0.53	0.53	0.53	0.55	0.56	0.56	0.54	0.56	0.57	0.56	0.55	0.55	0.54	0.55	0.55	0.55	0.55	0.56	0.55	0.54	0.55	0.54	0.54	0.55	0.54	0.54	0.55	0.55	0.55
Qipengyuania citrea CGMCC 1.8703	0.51	0.54	0.56	0.53	0.53	0.52	0.53	0.52	0.52	0.53	0.52	0.52	0.53	0.53	0.53	0.53	0.53	0.53	0.52	0.52	0.53	0.53	0.53	0.55	0.56	0.56	0.54	0.56	0.56	0.56	0.55	0.56	0.55	0.55	0.56	0.56	0.55	0.56	0.55	0.54	0.55	0.55	0.54	0.55	0.54	0.54	0.55	0.55	0.55
Qipengyuania flava DSM 16421	0.51	0.54	0.54	0.53	0.54	0.52	0.52	0.52	0.52	0.53	0.51	0.52	0.53	0.53	0.53	0.53	0.53	0.53	0.52	0.52	0.53	0.53	0.53	0.56	0.56	0.56	0.54	0.56	0.57	0.56	0.55	0.56	0.55	0.55	0.56	0.55	0.55	0.55	0.55	0.54	0.55	0.55	0.54	0.55	0.54	0.54	0.55	0.55	0.55
Qipengyuania mesophila YG27	0.51	0.54	0.55	0.54	0.54	0.52	0.53	0.52	0.52	0.53	0.52	0.52	0.52	0.53	0.53	0.53	0.53	0.52	0.52	0.52	0.53	0.53	0.53	0.55	0.56	0.56	0.54	0.56	0.56	0.56	0.55	0.55	0.55	0.56	0.56	0.55	0.55	0.56	0.55	0.54	0.55	0.55	0.55	0.55	0.54	0.55	0.55	0.55	0.55
Qipengyuania qiaonensis 6D47A	0.51	0.53	0.53	0.53	0.53	0.52	0.52	0.52	0.52	0.53	0.51	0.52	0.52	0.53	0.53	0.52	0.52	0.52	0.52	0.52	0.53	0.52	0.53	0.55	0.56	0.56	0.54	0.56	0.56	0.56	0.55	0.55	0.55	0.55	0.55	0.55	0.55	0.55	0.55	0.54	0.54	0.54	0.54	0.55	0.54	0.54	0.55	0.54	0.54
Qipengyuania pacifica NZ-96	0.51	0.53	0.55	0.53	0.53	0.52	0.52	0.52	0.52	0.53	0.51	0.52	0.52	0.52	0.53	0.52	0.52	0.52	0.51	0.52	0.53	0.52	0.53	0.55	0.56	0.56	0.54	0.56	0.56	0.56	0.55	0.55	0.55	0.55	0.55	0.55	0.55	0.55	0.54	0.54	0.54	0.54	0.54	0.54	0.53	0.54	0.55	0.54	0.54
Qipengyuania aerophila GH25	0.51	0.53	0.54	0.53	0.53	0.52	0.52	0.52	0.52	0.53	0.51	0.52	0.52	0.53	0.53	0.52	0.52	0.52	0.51	0.52	0.53	0.52	0.53	0.55	0.56	0.56	0.54	0.56	0.56	0.56	0.55	0.55	0.55	0.55	0.55	0.55	0.55	0.55	0.55	0.54	0.54	0.54	0.54	0.55	0.54	0.54	0.55	0.55	0.54
Qipengyuania gaetbuli DSM 16225	0.51	0.54	0.54	0.54	0.54	0.53	0.53	0.52	0.52	0.53	0.52	0.52	0.53	0.53	0.53	0.53	0.53	0.53	0.52	0.53	0.53	0.53	0.53	0.55	0.56	0.56	0.54	0.57	0.57	0.56	0.55	0.55	0.55	0.55	0.55	0.55	0.55	0.55	0.55	0.54	0.54	0.54	0.54	0.55	0.54	0.54	0.55	0.55	0.54
Qipengyuania psychrotolerans 1XM2-8	0.51	0.53	0.54	0.53	0.54	0.52	0.52	0.52	0.52	0.53	0.52	0.52	0.52	0.53	0.53	0.53	0.52	0.52	0.52	0.52	0.53	0.53	0.53	0.55	0.56	0.56	0.54	0.56	0.56	0.56	0.55	0.55	0.55	0.55	0.55	0.55	0.54	0.55	0.54	0.53	0.54	0.54	0.54	0.54	0.54	0.54	0.55	0.54	0.54
Qipengyuania seohaensis SW-135	0.51	0.53	0.54	0.53	0.53	0.52	0.52	0.51	0.52	0.53	0.51	0.52	0.52	0.53	0.53	0.52	0.52	0.52	0.52	0.52	0.53	0.52	0.53	0.55	0.56	0.56	0.54	0.56	0.56	0.56	0.55	0.55	0.55	0.55	0.55	0.55	0.55	0.55	0.55	0.54	0.54	0.54	0.54	0.54	0.54	0.54	0.55	0.54	0.54
Qipengyuania intermedia GH38	0.51	0.53	0.54	0.53	0.54	0.52	0.52	0.52	0.52	0.53	0.51	0.52	0.52	0.53	0.53	0.53	0.53	0.53	0.52	0.52	0.53	0.53	0.53	0.55	0.56	0.56	0.54	0.56	0.56	0.56	0.55	0.55	0.55	0.55	0.55	0.55	0.55	0.55	0.55	0.54	0.54	0.54	0.54	0.54	0.54	0.54	0.55	0.55	0.54
Qipengyuania nanhaisediminis CGMCC 1.7715	0.51	0.53	0.54	0.53	0.53	0.52	0.52	0.52	0.52	0.53	0.51	0.52	0.52	0.53	0.53	0.53	0.52	0.52	0.52	0.52	0.53	0.53	0.53	0.55	0.55	0.56	0.53	0.56	0.56	0.56	0.55	0.55	0.55	0.55	0.55	0.55	0.55	0.55	0.55	0.54	0.54	0.54	0.54	0.54	0.54	0.54	0.55	0.55	0.54
Qipengyuania aquimaris JCM 12189	0.51	0.53	0.54	0.53	0.53	0.52	0.52	0.52	0.52	0.53	0.52	0.52	0.52	0.53	0.53	0.53	0.53	0.52	0.52	0.52	0.53	0.53	0.53	0.55	0.56	0.56	0.54	0.56	0.56	0.56	0.55	0.55	0.55	0.55	0.56	0.55	0.55	0.55	0.55	0.54	0.54	0.54	0.54	0.54	0.54	0.54	0.55	0.55	0.54
Qipengyuania huizhouensis YG19	0.51	0.54	0.54	0.54	0.54	0.53	0.53	0.52	0.52	0.53	0.52	0.52	0.52	0.53	0.53	0.53	0.53	0.53	0.52	0.53	0.53	0.53	0.53	0.56	0.56	0.56	0.54	0.56	0.57	0.56	0.55	0.55	0.55	0.56	0.55	0.55	0.55	0.55	0.55	0.54	0.55	0.54	0.54	0.55	0.54	0.55	0.55	0.55	0.55
Qipengyuania vulgaris DSM 17792	0.51	0.53	0.54	0.53	0.53	0.52	0.52	0.51	0.51	0.53	0.51	0.52	0.52	0.53	0.53	0.52	0.52	0.52	0.52	0.52	0.53	0.52	0.52	0.55	0.56	0.56	0.54	0.56	0.56	0.56	0.55	0.55	0.55	0.55	0.55	0.55	0.55	0.55	0.55	0.54	0.54	0.54	0.54	0.54	0.54	0.54	0.55	0.54	0.54
Qipengyuania aestuarii GH1	0.51	0.53	0.55	0.53	0.53	0.52	0.52	0.52	0.52	0.53	0.51	0.52	0.52	0.52	0.53	0.52	0.52	0.52	0.52	0.52	0.53	0.52	0.53	0.55	0.56	0.56	0.54	0.56	0.56	0.56	0.55	0.55	0.55	0.55	0.55	0.55	0.55	0.55	0.54	0.54	0.54	0.54	0.54	0.55	0.54	0.54	0.55	0.55	0.54
Qipengyuania sphaerica GH29	0.51	0.53	0.53	0.53	0.53	0.52	0.52	0.52	0.52	0.53	0.52	0.52	0.52	0.53	0.53	0.52	0.53	0.52	0.52	0.52	0.53	0.53	0.53	0.55	0.56	0.56	0.54	0.56	0.56	0.56	0.55	0.55	0.55	0.55	0.55	0.55	0.55	0.55	0.55	0.54	0.54	0.54	0.54	0.55	0.54	0.54	0.55	0.55	0.54
Qipengyuania polymorpha 1NDH17	0.51	0.53	0.54	0.53	0.53	0.52	0.52	0.52	0.52	0.53	0.52	0.52	0.52	0.53	0.53	0.53	0.52	0.52	0.52	0.52	0.53	0.52	0.53	0.55	0.56	0.56	0.54	0.56	0.56	0.56	0.55	0.55	0.55	0.55	0.56	0.55	0.55	0.55	0.55	0.54	0.54	0.54	0.54	0.54	0.54	0.54	0.55	0.55	0.54
Qipengyuania aurantiaca 1NDH13	0.51	0.53	0.54	0.53	0.54	0.52	0.52	0.52	0.52	0.53	0.51	0.52	0.52	0.53	0.53	0.53	0.52	0.53	0.52	0.52	0.53	0.53	0.53	0.55	0.56	0.56	0.54	0.56	0.56	0.56	0.55	0.55	0.55	0.56	0.56	0.55	0.55	0.55	0.55	0.54	0.55	0.54	0.54	0.55	0.54	0.54	0.55	0.55	0.54
Qipengyuania vesicularis 1NDH10	0.51	0.53	0.53	0.54	0.53	0.52	0.52	0.52	0.52	0.53	0.51	0.52	0.52	0.53	0.53	0.52	0.52	0.52	0.52	0.52	0.53	0.52	0.53	0.55	0.56	0.56	0.54	0.56	0.56	0.56	0.55	0.55	0.55	0.55	0.56	0.55	0.55	0.55	0.55	0.54	0.54	0.54	0.54	0.55	0.54	0.54	0.55	0.55	0.55
Qipengyuania xiapuensis 1NDW9	0.51	0.54	0.54	0.53	0.54	0.53	0.53	0.52	0.52	0.53	0.52	0.52	0.52	0.53	0.53	0.53	0.53	0.53	0.52	0.53	0.53	0.53	0.53	0.55	0.56	0.56	0.54	0.56	0.56	0.56	0.55	0.55	0.55	0.56	0.56	0.55	0.55	0.55	0.55	0.54	0.55	0.54	0.54	0.55	0.54	0.54	0.55	0.55	0.55
Qipengyuania gelatinilytica 1NDH1	0.51	0.53	0.53	0.53	0.53	0.52	0.52	0.52	0.52	0.53	0.51	0.52	0.52	0.53	0.53	0.53	0.52	0.53	0.52	0.52	0.53	0.52	0.53	0.55	0.56	0.56	0.54	0.56	0.56	0.56	0.55	0.55	0.55	0.56	0.55	0.55	0.55	0.55	0.55	0.54	0.54	0.54	0.54	0.55	0.54	0.54	0.55	0.55	0.54
[truncated: 380 more columns]

## Sheet: Table S4
Table S4. dDDH values among Sphingomonadales type strain genomes.
	Actirhodobacter atriluteus HHU K3-1	Allosphingosinicella indica Dd16	Allosphingosinicella vermicomposti KCTC 22446	Alteraurantiacibacter aestuarii JCM 16339	Alteraurantiacibacter aquimixticola SSKS-13	Alteraurantiacibacter buctensis M0322	Altererythrobacter aquiaggeris NBRC 112425	Altererythrobacter epoxidivorans CGMCC 1.7731	Altererythrobacter fulvus KACC 19119	Altererythrobacter insulae BPTF-M16	Altererythrobacter ishigakiensis NBRC 107699	Altererythrobacter lauratis KCTC 52606	Altererythrobacter lutimaris JGD-16	Altererythrobacter palmitatis KCTC 52607	Altererythrobacter xiamenensis CGMCC 1.12494	Altericroceibacterium endophyticum LMG 29518	Altericroceibacterium indicum DSM 18604	Altericroceibacterium spongiae HN-Y73	Alteripontixanthobacter maritimus HME9302	Alteripontixanthobacter muriae SALINAS58	Alteriqipengyuania abyssalis NZ-12B	Alteriqipengyuania halimionae LMG 29519	Alteriqipengyuania lutimaris S-5	Aquisediminimonas profunda DS48-3	Aquisediminimonas sediminicola CH68-4	Aurantiacibacter aquimixticola JSSK-14	Aurantiacibacter arachoides RC4-10-4	Aurantiacibacter atlanticus s21-N3	Aurantiacibacter gangjinensis CGMCC 1.15024	Aurantiacibacter luteus KA37	Aurantiacibacter marinus KCTC 23554	Aurantiacibacter odishensis KCTC 23981	Aurantiacibacter rhizosphaerae GH3-10	Aurantiacibacter sediminis JGD-13	Aurantiacibacter spongiae HN-E23	Aurantiacibacter suaedae GH3-15	Aurantiacibacter xanthus CCTCC AB 2015396	Aurantiacibacter zhengii V18	Blastomonas aquatica CGMCC 1.12851	Blastomonas fulva T2	Blastomonas marina CGMCC 1.15297	Blastomonas natatoria DSM 3183	Blastomonas ursincola KR 99	Caenibius tardaugens NBRC 16725	Chakrabartia godavariana PRB40	Chioneia algoris R-39594	Chioneia brumae R-39161	Chioneia frigida R-67880	Chioneia hiemis R-36677
Actirhodobacter atriluteus HHU K3-1		18.6	19.3	19.8	19.3	20.2	19.6	19.5	19.1	18.5	18.6	17.9	18.9	18.9	19	19.4	20.7	21.4	18.8	18.3	19.5	19.2	19.4	19.4	19.2	19	18.6	30.9	19.3	18.7	18.4	19.4	19.4	19.4	19	19.2	20.2	21.4	19.1	19.1	19.4	19	19	19.6	18.7	18.1	17.9	17.9	18.6
Allosphingosinicella indica Dd16	18.6		19.9	19.2	19	19	18.5	18.8	19.2	19.8	18.6	18.9	17.8	19	19	19.2	23.9	19	19.4	19.7	19.2	18.5	19.3	18.9	19	19.2	18.9	19.2	19.1	19.2	19.8	18.8	18.9	19.2	19.5	18.7	19.2	19.1	19.4	18.9	18.9	19.6	19.5	19.5	19.2	18.5	18.4	18.3	18.4
Allosphingosinicella vermicomposti KCTC 22446	19.3	19.9		20	18.9	18.5	19.2	19.5	19.7	19.1	19.2	19.3	20.1	19.5	20	19.1	20.5	19.3	18.6	18.7	20.2	19.4	19.6	20	19.2	19.5	19	19.2	19.3	18.9	20	19.6	18.5	19.2	19.2	19.6	20.4	18.6	19.9	20.1	19.3	20.4	19.8	19.9	19.7	18.3	18.7	19.1	18.8
Alteraurantiacibacter aestuarii JCM 16339	19.8	19.2	20		20.2	19	19.3	19.1	18.9	19.2	19.6	19.3	19.3	19.2	20.3	18.3	19.3	18.6	19.7	19.2	20.6	19.4	19.8	19.8	18.6	18.8	18.8	18.1	18.5	18.9	18.7	18.9	18.8	18.8	18.3	19.4	20	19	18.8	20.3	19.8	19	19	18.8	19.8	18.3	18.2	19	18.1
Alteraurantiacibacter aquimixticola SSKS-13	19.3	19	18.9	20.2		19.4	18.2	19.6	19.4	19.8	19.8	19.5	19.1	19.3	19.3	18	18.8	18.6	19.2	19.5	19.6	19.5	19.3	19.5	18.7	19.1	18.9	18.5	18.9	19.4	18.7	19.5	19	19.1	18.9	19.5	19.6	19.1	18.7	19.3	19.5	19.3	19.3	18.9	19.1	18	17.7	18.7	18
Alteraurantiacibacter buctensis M0322	20.2	19	18.5	19	19.4		21.5	19.3	19.7	19.7	19.9	19.9	19.6	20	18.5	18.1	19.5	18.4	19	18.5	19.2	18.6	18.7	19.3	18.1	18.3	18.9	20.9	18.6	18.8	18.4	18.4	18.4	18.6	18.5	18.7	19.6	18.7	19.2	18.5	19.3	19.9	19.1	18.8	18.5	17.6	17.7	17.8	17.7
Altererythrobacter aquiaggeris NBRC 112425	19.6	18.5	19.2	19.3	18.2	21.5		19.3	18.2	18	18.7	17.9	18.7	19	21.4	18.8	19.3	19.4	19.2	18.5	22.9	18.6	19.1	17.9	18.4	18.7	19.7	19.3	18.1	18.3	18.9	18.6	18.9	19.5	19.5	18.7	20.3	23	18.9	19.6	19.1	21	19.1	19	18.9	19.2	19.4	18.7	20.5
Altererythrobacter epoxidivorans CGMCC 1.7731	19.5	18.8	19.5	19.1	19.6	19.3	19.3		19.6	17.8	18.5	19.2	18.9	20.7	19.8	19.1	19.8	23.9	18.4	18.6	20.8	19.3	19.8	18.7	18.7	19.2	19.5	20.3	19.5	19.5	19	19.4	21.3	20	21.4	19.2	20.2	20.6	18.9	19.5	21.5	19.7	19.2	19.8	19.1	18.5	18.6	18.2	18.3
Altererythrobacter fulvus KACC 19119	19.1	19.2	19.7	18.9	19.4	19.7	18.2	19.6		18.5	19.4	19.2	18.7	19	19.5	18.4	18.6	18.5	18.7	18.8	19.5	18.8	19.5	21.1	19.3	18.7	18.8	18.1	18.8	19.2	18.2	19.2	18.5	18.7	18.8	18.5	19.4	19.2	19.3	19.6	19.5	19.7	19.6	19.5	19.4	18.2	17.7	18.6	18.1
Altererythrobacter insulae BPTF-M16	18.5	19.8	19.1	19.2	19.8	19.7	18	17.8	18.5		19.4	19.8	18.6	19.1	18.6	18.5	20.3	19.4	18.2	18.5	20	19.9	19.5	19	18.5	19.4	18.4	19.2	19.3	18.8	18.7	18.4	18.5	19.1	19.9	18.9	19.9	20	18.8	19.2	19.6	19.3	18.4	19.3	18.6	18	18.7	17.9	18.1
Altererythrobacter ishigakiensis NBRC 107699	18.6	18.6	19.2	19.6	19.8	19.9	18.7	18.5	19.4	19.4		19.9	19.5	20	18.7	18.7	20.1	19.1	18.1	18.2	20.1	19.8	19.3	18.7	19.5	19.6	19.2	20	19.3	20.2	19	19.4	19	18.6	18.9	18.6	20.8	20.1	17.9	17.8	19.6	18.2	18.2	19.1	17.9	18.9	19	18	17.9
Altererythrobacter lauratis KCTC 52606	17.9	18.9	19.3	19.3	19.5	19.9	17.9	19.2	19.2	19.8	19.9		19	36.3	18.5	18.5	18.4	19.1	18.1	18.3	19.1	19	18.7	18.2	18.4	18.4	18.6	18.4	18.7	18.6	18.3	18.6	18.3	18.2	18.4	18.7	19.2	18.3	18.9	18.9	18.7	19	19.3	19.1	18.4	18.3	17.9	18.3	18.3
Altererythrobacter lutimaris JGD-16	18.9	17.8	20.1	19.3	19.1	19.6	18.7	18.9	18.7	18.6	19.5	19		19.7	18.7	19.5	20.9	20	19.1	19.1	19.9	19.6	20.2	18.4	18.3	20	19.7	18.5	20	19.3	19.3	19.4	18.8	18.8	19	18.8	20.3	19.4	19.1	18.9	19.8	18.8	19	19.6	18.4	19.4	18.9	18.7	18.5
Altererythrobacter palmitatis KCTC 52607	18.9	19	19.5	19.2	19.3	20	19	20.7	19	19.1	20	36.3	19.7		18.9	18.2	19.3	21.8	18.4	18.8	19.4	19.2	18.4	19.3	18.5	18.5	18.5	19	18.5	18.4	18.2	18.4	19.1	18.2	19.3	18.4	19.5	19	18.9	19.1	19.4	22	18.9	18.8	18.6	18.2	18	18.6	17.7
Altererythrobacter xiamenensis CGMCC 1.12494	19	19	20	20.3	19.3	18.5	21.4	19.8	19.5	18.6	18.7	18.5	18.7	18.9		19.5	20.1	20.6	18.9	18.8	20.1	19.9	19.9	18	18.7	19.7	19	19.5	18.9	19.5	19.5	19.9	19.4	19.5	19.4	19.1	19.8	20.6	19.6	19.3	20	19	18.8	18.7	18.9	17.8	17.7	17.7	17.6
Altericroceibacterium endophyticum LMG 29518	19.4	19.2	19.1	18.3	18	18.1	18.8	19.1	18.4	18.5	18.7	18.5	19.5	18.2	19.5		20.5	19.7	18.2	18.7	20.4	18.7	20.3	19.3	18.8	18.6	19.4	19.7	18.6	18.6	18.9	18.7	18.6	19.1	18.9	19.8	21.1	19.2	19.3	20	19.6	19.2	19	19.4	19	18.9	19.5	18.5	20.3
Altericroceibacterium indicum DSM 18604	20.7	23.9	20.5	19.3	18.8	19.5	19.3	19.8	18.6	20.3	20.1	18.4	20.9	19.3	20.1	20.5		19.5	19.6	19.7	20.9	21.1	20.1	23.2	20.6	22.6	19.7	20.7	19.4	18.7	18.8	19.7	19.3	19.6	20.6	20.2	27.6	19.2	20.5	21	19.4	21.1	20.4	19.7	20.4	25	29.9	21.4	26.4
Altericroceibacterium spongiae HN-Y73	21.4	19	19.3	18.6	18.6	18.4	19.4	23.9	18.5	19.4	19.1	19.1	20	21.8	20.6	19.7	19.5		20.1	19.2	21.2	18.8	19.3	20.5	18.2	18.6	20.1	22.7	18.6	19.2	18.5	19.1	22.1	19.1	22.2	18.7	22.2	22.4	18.6	19.9	19.3	19	18.9	19	18.8	18.4	18.1	17.8	19.6
Alteripontixanthobacter maritimus HME9302	18.8	19.4	18.6	19.7	19.2	19	19.2	18.4	18.7	18.2	18.1	18.1	19.1	18.4	18.9	18.2	19.6	20.1		18.6	19.7	19.4	18.8	18.7	17.9	19	18.3	19.4	18.5	18.4	18.5	19.2	18.5	18.5	18.5	18.8	18.7	19	19.3	19.3	19.4	18.5	17.9	19	18.7	18.3	18.3	18.2	18.3
Alteripontixanthobacter muriae SALINAS58	18.3	19.7	18.7	19.2	19.5	18.5	18.5	18.6	18.8	18.5	18.2	18.3	19.1	18.8	18.8	18.7	19.7	19.2	18.6		19.3	19.3	19	19.7	18	18.9	18.7	18.9	18.6	18.3	18.2	18.9	18.5	18.6	18.5	18.6	19.4	19.3	18.6	19.6	19	19.8	19.1	19.3	19.5	18.8	19.3	18.7	19.2
Alteriqipengyuania abyssalis NZ-12B	19.5	19.2	20.2	20.6	19.6	19.2	22.9	20.8	19.5	20	20.1	19.1	19.9	19.4	20.1	20.4	20.9	21.2	19.7	19.3		20.3	24.8	19.8	19.5	19.5	19.3	20.2	19.3	19.6	19.2	19.4	20	19.7	20.4	19.7	20.6	20.2	18.9	18.8	20.5	19.8	19.1	20.1	18.6	18.6	17.7	18	17.9
Alteriqipengyuania halimionae LMG 29519	19.2	18.5	19.4	19.4	19.5	18.6	18.6	19.3	18.8	19.9	19.8	19	19.6	19.2	19.9	18.7	21.1	18.8	19.4	19.3	20.3		20.1	19.9	18.4	19.7	18.9	19.7	19.6	19.6	18.9	19	19.3	19.6	19	19.4	20.1	19.7	18.8	19.4	22.5	19.1	19.1	19.5	19.1	18.5	18.3	17.9	18.4
Alteriqipengyuania lutimaris S-5	19.4	19.3	19.6	19.8	19.3	18.7	19.1	19.8	19.5	19.5	19.3	18.7	20.2	18.4	19.9	20.3	20.1	19.3	18.8	19	24.8	20.1		20.2	19	19.6	19.6	18.8	19.5	19.3	19.2	19.5	19.3	19	18.9	19.4	19.4	19.3	18.7	18.5	19.8	19.1	18.9	19.1	18.7	18.2	18	17.3	17.9
Aquisediminimonas profunda DS48-3	19.4	18.9	20	19.8	19.5	19.3	17.9	18.7	21.1	19	18.7	18.2	18.4	19.3	18	19.3	23.2	20.5	18.7	19.7	19.8	19.9	20.2		18.9	18.5	18.5	21.4	19.6	20	18.6	18.9	18.3	19.1	20.3	18.6	20.6	19.7	20.3	19.6	18.6	19.7	19.1	19.8	19	18.7	18.1	17.8	18.3
Aquisediminimonas sediminicola CH68-4	19.2	19	19.2	18.6	18.7	18.1	18.4	18.7	19.3	18.5	19.5	18.4	18.3	18.5	18.7	18.8	20.6	18.2	17.9	18	19.5	18.4	19	18.9		19.3	18.7	18.3	18.6	18.7	18.7	18.7	18.3	17.9	17.9	18	19.2	18	19.3	19.7	18.6	19.8	19.2	19.2	20.3	18.7	20	18.7	19.1
Aurantiacibacter aquimixticola JSSK-14	19	19.2	19.5	18.8	19.1	18.3	18.7	19.2	18.7	19.4	19.6	18.4	20	18.5	19.7	18.6	22.6	18.6	19	18.9	19.5	19.7	19.6	18.5	19.3		19.1	18.8	19.5	19.3	19	19.3	19	19.4	18.8	19.3	19.6	19.4	19.2	19.3	19.3	19.1	19.1	19.1	18.6	18.5	17.8	18.8	18.1
Aurantiacibacter arachoides RC4-10-4	18.6	18.9	19	18.8	18.9	18.9	19.7	19.5	18.8	18.4	19.2	18.6	19.7	18.5	19	19.4	19.7	20.1	18.3	18.7	19.3	18.9	19.6	18.5	18.7	19.1		18.1	18.7	25.3	18.4	19.3	18.7	18.5	18.9	19	19.4	19.5	18.6	19.3	19.3	19.4	18.9	19.1	18.9	17.7	18.1	18.2	17.9
Aurantiacibacter atlanticus s21-N3	30.9	19.2	19.2	18.1	18.5	20.9	19.3	20.3	18.1	19.2	20	18.4	18.5	19	19.5	19.7	20.7	22.7	19.4	18.9	20.2	19.7	18.8	21.4	18.3	18.8	18.1		18.5	18	18.6	18.7	18.6	18.8	18.8	18.6	22	21.3	19.5	20.9	19.9	20	19.1	18.5	18.2	18.9	18.9	18.7	21.9
Aurantiacibacter gangjinensis CGMCC 1.15024	19.3	19.1	19.3	18.5	18.9	18.6	18.1	19.5	18.8	19.3	19.3	18.7	20	18.5	18.9	18.6	19.4	18.6	18.5	18.6	19.3	19.6	19.5	19.6	18.6	19.5	18.7	18.5		19.1	18.9	19.8	19.6	19.1	18.9	18.8	19.6	19.6	19.1	19.3	19.5	19.5	19.2	19.3	18.3	20	17.7	18	17.8
Aurantiacibacter luteus KA37	18.7	19.2	18.9	18.9	19.4	18.8	18.3	19.5	19.2	18.8	20.2	18.6	19.3	18.4	19.5	18.6	18.7	19.2	18.4	18.3	19.6	19.6	19.3	20	18.7	19.3	25.3	18	19.1		18.2	19.5	18.7	18.8	19.2	19.3	20.1	19.4	18.8	18.5	19.5	19	19.4	19.5	18.7	18.2	18.2	17.8	17.9
Aurantiacibacter marinus KCTC 23554	18.4	19.8	20	18.7	18.7	18.4	18.9	19	18.2	18.7	19	18.3	19.3	18.2	19.5	18.9	18.8	18.5	18.5	18.2	19.2	18.9	19.2	18.6	18.7	19	18.4	18.6	18.9	18.2		18.2	18.4	18.8	18.2	18.5	18.6	18.4	18.5	19.2	19.8	18.9	18.4	19.3	18.4	18.2	17.5	18.1	18.4
Aurantiacibacter odishensis KCTC 23981	19.4	18.8	19.6	18.9	19.5	18.4	18.6	19.4	19.2	18.4	19.4	18.6	19.4	18.4	19.9	18.7	19.7	19.1	19.2	18.9	19.4	19	19.5	18.9	18.7	19.3	19.3	18.7	19.8	19.5	18.2		21.8	18.8	19.3	19.3	19.8	26.1	19.2	18.5	19.6	18.9	18.6	19.1	18.3	17.9	17.5	17.8	17.9
Aurantiacibacter rhizosphaerae GH3-10	19.4	18.9	18.5	18.8	19	18.4	18.9	21.3	18.5	18.5	19	18.3	18.8	19.1	19.4	18.6	19.3	22.1	18.5	18.5	20	19.3	19.3	18.3	18.3	19	18.7	18.6	19.6	18.7	18.4	21.8		18.8	19.5	18.8	19.8	21.7	18.7	18.9	20.8	19.1	19.3	19.1	18	18.3	18.1	18.3	17.7
Aurantiacibacter sediminis JGD-13	19.4	19.2	19.2	18.8	19.1	18.6	19.5	20	18.7	19.1	18.6	18.2	18.8	18.2	19.5	19.1	19.6	19.1	18.5	18.6	19.7	19.6	19	19.1	17.9	19.4	18.5	18.8	19.1	18.8	18.8	18.8	18.8		18.5	18.7	20	18.9	19.6	19.4	20	18.6	19	19.5	18.3	17.6	17.6	18.4	17.5
Aurantiacibacter spongiae HN-E23	19	19.5	19.2	18.3	18.9	18.5	19.5	21.4	18.8	19.9	18.9	18.4	19	19.3	19.4	18.9	20.6	22.2	18.5	18.5	20.4	19	18.9	20.3	17.9	18.8	18.9	18.8	18.9	19.2	18.2	19.3	19.5	18.5		18.9	21	19.4	18.6	19	19.1	19	18.9	18.9	18.5	18.5	17.6	18.8	18.5
Aurantiacibacter suaedae GH3-15	19.2	18.7	19.6	19.4	19.5	18.7	18.7	19.2	18.5	18.9	18.6	18.7	18.8	18.4	19.1	19.8	20.2	18.7	18.8	18.6	19.7	19.4	19.4	18.6	18	19.3	19	18.6	18.8	19.3	18.5	19.3	18.8	18.7	18.9		32.8	19.2	18.5	19	19.7	19	18.9	18.8	18.8	18.4	18.1	17.7	17.9
Aurantiacibacter xanthus CCTCC AB 2015396	20.2	19.2	20.4	20	19.6	19.6	20.3	20.2	19.4	19.9	20.8	19.2	20.3	19.5	19.8	21.1	27.6	22.2	18.7	19.4	20.6	20.1	19.4	20.6	19.2	19.6	19.4	22	19.6	20.1	18.6	19.8	19.8	20	21	32.8		20.2	19.9	19.7	20	20	19.6	19.9	18.9	18.5	18.7	18.2	19.3
Aurantiacibacter zhengii V18	21.4	19.1	18.6	19	19.1	18.7	23	20.6	19.2	20	20.1	18.3	19.4	19	20.6	19.2	19.2	22.4	19	19.3	20.2	19.7	19.3	19.7	18	19.4	19.5	21.3	19.6	19.4	18.4	26.1	21.7	18.9	19.4	19.2	20.2		18.7	18.7	20.4	20.1	18.9	19.3	18.9	18.1	18.6	18.2	18.7
Blastomonas aquatica CGMCC 1.12851	19.1	19.4	19.9	18.8	18.7	19.2	18.9	18.9	19.3	18.8	17.9	18.9	19.1	18.9	19.6	19.3	20.5	18.6	19.3	18.6	18.9	18.8	18.7	20.3	19.3	19.2	18.6	19.5	19.1	18.8	18.5	19.2	18.7	19.6	18.6	18.5	19.9	18.7		27.7	18.9	22.8	23.1	19.8	19.2	17.7	18.4	18.5	17.6
Blastomonas fulva T2	19.1	18.9	20.1	20.3	19.3	18.5	19.6	19.5	19.6	19.2	17.8	18.9	18.9	19.1	19.3	20	21	19.9	19.3	19.6	18.8	19.4	18.5	19.6	19.7	19.3	19.3	20.9	19.3	18.5	19.2	18.5	18.9	19.4	19	19	19.7	18.7	27.7		19.1	24.2	24.7	24.3	19.2	18.4	17.9	18.2	18.1
Blastomonas marina CGMCC 1.15297	19.4	18.9	19.3	19.8	19.5	19.3	19.1	21.5	19.5	19.6	19.6	18.7	19.8	19.4	20	19.6	19.4	19.3	19.4	19	20.5	22.5	19.8	18.6	18.6	19.3	19.3	19.9	19.5	19.5	19.8	19.6	20.8	20	19.1	19.7	20	20.4	18.9	19.1		20	19.4	19.7	18.4	17.7	17.7	18	18
Blastomonas natatoria DSM 3183	19	19.6	20.4	19	19.3	19.9	21	19.7	19.7	19.3	18.2	19	18.8	22	19	19.2	21.1	19	18.5	19.8	19.8	19.1	19.1	19.7	19.8	19.1	19.4	20	19.5	19	18.9	18.9	19.1	18.6	19	19	20	20.1	22.8	24.2	20		31.6	20.2	19.4	18.2	17.8	18.5	18.1
Blastomonas ursincola KR 99	19	19.5	19.8	19	19.3	19.1	19.1	19.2	19.6	18.4	18.2	19.3	19	18.9	18.8	19	20.4	18.9	17.9	19.1	19.1	19.1	18.9	19.1	19.2	19.1	18.9	19.1	19.2	19.4	18.4	18.6	19.3	19	18.9	18.9	19.6	18.9	23.1	24.7	19.4	31.6		19.8	19.3	18.2	18.2	19.5	18.3
Caenibius tardaugens NBRC 16725	19.6	19.5	19.9	18.8	18.9	18.8	19	19.8	19.5	19.3	19.1	19.1	19.6	18.8	18.7	19.4	19.7	19	19	19.3	20.1	19.5	19.1	19.8	19.2	19.1	19.1	18.5	19.3	19.5	19.3	19.1	19.1	19.5	18.9	18.8	19.9	19.3	19.8	24.3	19.7	20.2	19.8		20.2	18.9	18.9	18.8	19.8
Chakrabartia godavariana PRB40	18.7	19.2	19.7	19.8	19.1	18.5	18.9	19.1	19.4	18.6	17.9	18.4	18.4	18.6	18.9	19	20.4	18.8	18.7	19.5	18.6	19.1	18.7	19	20.3	18.6	18.9	18.2	18.3	18.7	18.4	18.3	18	18.3	18.5	18.8	18.9	18.9	19.2	19.2	18.4	19.4	19.3	20.2		18.5	17.9	18	17.8
Chioneia algoris R-39594	18.1	18.5	18.3	18.3	18	17.6	19.2	18.5	18.2	18	18.9	18.3	19.4	18.2	17.8	18.9	25	18.4	18.3	18.8	18.6	18.5	18.2	18.7	18.7	18.5	17.7	18.9	20	18.2	18.2	17.9	18.3	17.6	18.5	18.4	18.5	18.1	17.7	18.4	17.7	18.2	18.2	18.9	18.5		32.4	22.1	33.5
Chioneia brumae R-39161	17.9	18.4	18.7	18.2	17.7	17.7	19.4	18.6	17.7	18.7	19	17.9	18.9	18	17.7	19.5	29.9	18.1	18.3	19.3	17.7	18.3	18	18.1	20	17.8	18.1	18.9	17.7	18.2	17.5	17.5	18.1	17.6	17.6	18.1	18.7	18.6	18.4	17.9	17.7	17.8	18.2	18.9	17.9	32.4		22	33.5
Chioneia frigida R-67880	17.9	18.3	19.1	19	18.7	17.8	18.7	18.2	18.6	17.9	18	18.3	18.7	18.6	17.7	18.5	21.4	17.8	18.2	18.7	18	17.9	17.3	17.8	18.7	18.8	18.2	18.7	18	17.8	18.1	17.8	18.3	18.4	18.8	17.7	18.2	18.2	18.5	18.2	18	18.5	19.5	18.8	18	22.1	22		22.1
Chioneia hiemis R-36677	18.6	18.4	18.8	18.1	18	17.7	20.5	18.3	18.1	18.1	17.9	18.3	18.5	17.7	17.6	20.3	26.4	19.6	18.3	19.2	17.9	18.4	17.9	18.3	19.1	18.1	17.9	21.9	17.8	17.9	18.4	17.9	17.7	17.5	18.5	17.9	19.3	18.7	17.6	18.1	18	18.1	18.3	19.8	17.8	33.5	33.5	22.1
Croceibacterium atlanticum 26DY36	19.9	18.8	19.7	19	18.8	19.3	19.2	18.9	19	19.1	19	18.5	19.1	18.7	19.9	18.9	19.2	19.8	18.4	18.7	19.6	19.1	18.9	19.3	18.4	18.3	18.5	19.5	18.3	18.4	18.1	18.4	18	18.6	19.5	18.5	22.4	18.7	19	19	19.1	19.4	19.5	19.2	19.3	19.9	18.9	18.5	19.9
Croceibacterium ferulae SX2RGS8	18.4	19.4	19.3	18.8	18.9	19.3	18	18.9	19.1	18.2	18.1	19	18.9	19.1	18.7	18.7	18.6	18	18	18.1	19.2	18.6	19.1	19.4	18.2	18.9	19	18.6	18.7	19.2	18.2	18.8	19	18.4	19	18.4	19	18.6	19	18.5	19.1	19.6	19.3	18.4	18.7	18.6	18.4	18.4	18.2
Croceibacterium mercuriale Coronado	18.4	19.1	19.1	19.3	18.9	18.7	17.9	18.5	19.2	18.7	19.7	18.6	18.6	18.5	18.5	18.8	19	17.8	18	18.4	18.9	19.3	19	18.9	18.7	18.6	18.8	18.5	18.6	18.7	19.5	18.6	18.6	18.1	18.7	18.6	19.2	18.7	19.7	18.7	19.1	19.4	19	18.5	19.6	18.2	18.1	17.9	17.7
Croceibacterium salegens MCCC 1K01500	19.5	19	20.5	19	19.1	18.8	19.6	20.1	19.1	19.2	19.9	18.9	20.2	18.9	19.7	20.4	21	20.1	19.4	19.9	20.1	19.9	19.5	19.3	18.4	19.3	19.3	21.5	18.9	19.6	19.2	19.4	19.4	19	19.8	19.4	20.5	18.9	19.7	19	19.6	19.8	19.7	19.8	19.3	18.1	18.3	18.5	18.1
Croceibacterium soli MCCC 1K02066	19.3	19.1	19.8	19.3	19.5	19.2	18.3	19.5	19.8	20	18.9	19.4	19.1	18.8	19.5	18.8	19.3	19.5	18.9	19	19.4	19.1	19.2	19.6	20.3	19.1	19	18.5	19.1	19.4	18.6	19.5	18.6	19.4	19	19.3	19.7	19.6	19.6	19.3	19.6	19.5	19.7	19.6	19.5	18.5	18.2	18.7	17.9
Croceibacterium xixiisoli S36	19	19.4	19.6	18.8	18.9	18.6	19	19.2	19.1	20.5	19.2	18.8	18.9	18.8	18.4	18.1	19.2	18.5	18.1	18.7	19.1	19.5	18.9	18.8	19	18.9	18.3	18.3	18.6	18.4	18.7	18.6	18.6	18.5	18.7	18.4	19.2	19	19.4	19.2	19.1	19.7	18.9	18.9	18.7	17.7	18.1	18.6	18.2
Croceicoccus bisphenolivorans H4	19.3	19.7	20.3	19	19.5	19.5	21.9	20.7	20.5	18.9	19.7	18.9	19.5	19.2	20	18.7	20	21.1	19	19.4	22	20.2	20	19.4	17.9	19.9	19.4	20.8	19.7	19.4	18.7	19.5	19.2	19.5	21.8	19.5	25.5	20	19.1	19.6	20.5	20.4	19.8	19.5	19.7	18.4	18.4	18.3	18.3
Croceicoccus estronivorus MH-B5	19.6	19	19.8	18.3	18.2	19.4	18.2	19.1	19.7	18.8	19.1	20.3	18.8	19.8	19.4	19.3	21.7	20.6	18.9	18.5	19.7	19.1	19.1	20.7	19.9	18.8	18.7	19.9	19.8	18.8	18.2	18.9	18.2	18.9	19	18.5	19.9	18.4	19.5	19.3	19.3	19.6	20	19.3	20.2	18.6	17.8	18.8	19.6
Croceicoccus gelatinilyticus 1NDH52	19.3	19.5	20	19.8	19.6	19.6	27.3	21.1	20	19.5	19.9	19.2	19.2	19.8	21	19	20.5	22.2	19	19.2	21.2	19.9	19.8	18.6	18.4	18.6	19.3	21.6	19.2	19.5	19.3	19.1	19.5	19.6	19.9	20.1	21.2	23	19.2	19.1	20.6	20.4	19.7	20.2	19.7	17.9	18.3	17.6	18.1
Croceicoccus hydrothermalis JLT1	21.8	19	18.8	19.6	19.2	19.4	20.1	20.6	19.7	18	19	19	19.5	19.9	19.9	19	20	22.6	18.3	19.3	21	19.4	19.7	19.3	19.2	19.8	19.4	25.2	18.7	18.9	19.2	19.2	20.7	19.7	21.3	19.7	23.4	22.9	19.3	19.5	20.7	20.1	19.4	20.3	18.7	18.6	18	19	18.7
Croceicoccus marinus E4A9	23	19.2	19.4	19.7	19.6	20.2	21.1	19.3	20.3	19.8	20.2	19.2	19.4	19.4	19.8	19.9	21.3	21.9	19	18.8	20	19.9	19.2	19.1	18.6	19.8	19.1	30.3	19.3	19.2	19	19.5	20.1	19.8	19.4	19.4	22.2	20.5	19	19.2	19.8	19.3	19.5	20.2	19.3	18.4	18.3	18.7	18.7
Croceicoccus mobilis Ery22	20.1	19.9	20.9	19.7	19.9	19.7	24.4	20.3	20.9	21.2	20	19.3	20.6	19.7	21	19.7	21.5	22.7	19.5	19.4	20.4	20.2	20.1	20.1	18.7	19.5	19.5	21	19.7	19.6	19	19.8	19.4	19.8	20	19.2	21.3	23.7	19.6	20.2	19.8	20.2	20	19.9	20	19	19.2	19.4	18.8
Croceicoccus naphthovorans PQ-2	19.3	19.2	19.4	19.8	19.7	19.6	21.5	20.9	19.9	19.4	19.8	19.3	20.2	19.5	20.5	19.7	21.6	22.9	18.4	19.3	20.2	19.9	18.8	19.5	18.6	19.2	19	24.2	19.5	19.5	18.8	19.7	19.6	19.8	20.6	19.3	25.2	20.5	19.4	19.7	20.4	19.9	19.2	19.9	20.2	17.7	17.5	18	18.3
Croceicoccus pelagius Ery9	19.3	19.4	20.5	19.1	19.5	19.4	20.9	20.8	20	19.8	20.3	19.8	20	20.3	19.8	19.4	20.6	22.3	19.4	19.6	21.9	20.2	19.6	20.8	18.2	19.3	19.2	21	19.2	19.1	19.6	19.4	20.6	19.4	23.4	20.2	23.3	20.1	19	19.8	20.6	19.9	19.8	20.3	19.8	18.4	19	18.1	18.6
Croceicoccus ponticola GM-16	18.8	19.2	19.7	19	19.1	19.3	18.8	19.2	19.6	18.9	19.5	19	19.3	19.7	19.7	18.5	21	19	19	18.8	19.5	19.7	19.4	18.4	18.3	18.8	18.6	19	18.8	19	18.8	19.4	18.5	18.8	18.7	19.3	20.3	19.2	18.8	19.3	19.9	19.2	19.5	19.7	18.6	18.6	18	18.6	17.8
Croceicoccus sediminis S2-4-2	19.3	19.3	19.8	18.6	19.3	19.3	18.9	20.4	20	19.1	19.7	19.3	19.5	18.9	19.9	20.5	20.3	20.1	19.1	18.6	19.5	20.1	19.3	19.1	18	19.1	19.4	19.5	19.9	19.9	19.1	19.4	20.2	19.7	18.8	19.8	22.2	19.5	19.3	19.5	20.3	19.7	19.8	19.9	18.9	18	18.2	17.8	18.1
Erythrobacter ani WH131	19.5	19.6	19.1	19	19.3	21.2	23.8	19.1	19.1	18.7	19.3	18.8	18.8	19.4	19.8	19.9	21.6	21.5	19.1	18.8	20.8	19.6	19.1	19	18.8	19.1	20.3	20.2	19.9	19.5	19.1	19.5	20.6	19.9	20.3	19.6	20.9	25.9	18.6	19	21	19.7	18.8	19.3	19.8	18	17.5	17.9	17.7
Erythrobacter aurantius C5	19.4	19.1	18.9	18.8	19.2	19.3	18.3	19.8	19.3	18.8	19.1	19.1	19.1	19.4	19.3	19.2	20.4	19.1	18.5	18.4	19.6	19.5	19.8	18.4	18.3	19.7	19.4	19.9	19.2	20	19	19.4	19.2	19.3	18.9	19.4	20.4	19.8	19	19.1	19.6	19.4	19.5	19.8	18.9	18.5	18.4	18.2	17.8
Erythrobacter colymbi JCM 18338	19	19.1	19.6	19.4	19.9	19.4	18.7	19.6	19.7	19.2	19.4	19.5	19.9	19.8	19.7	19.1	21.1	20.5	18.6	19.3	19.6	19.5	19.3	18.9	20	19.1	19.7	19.8	19.2	19.5	19	19.1	19.1	19.7	18.9	19.9	20	19.5	18.8	19.4	19.4	24.6	19.2	20.5	18.5	17.9	17.8	17.8	18.6
Erythrobacter crassostreae WH158	18.5	22.2	21	19.6	19.8	19.8	18.5	18.3	17.8	17.9	17.8	17.7	18.8	18.1	18.2	17.7	19.6	18.1	19.2	18.7	19.1	19.1	18.9	21.3	20.4	18.8	18.5	19.1	19.5	18.3	18.6	19.8	18.1	18.7	18.8	19.2	20.7	19.3	20	19.7	18.8	19.4	19.5	18.3	19.9	19.7	18.1	19.7	20.8
Erythrobacter cryptus DSM 12079	18.2	19.1	18.8	18.4	19.1	18.6	17.9	19.1	18.7	18.6	19	20.7	17.7	18.8	18.8	18.1	20	18	18.2	18.4	18.8	18.7	18.6	19.7	18.5	18.6	18.8	18.2	18.8	19.1	18.7	19	18.7	18.5	18.6	19.3	19.5	18.6	18	18.9	18.9	18.9	18.5	20	18	17.9	18.2	17.2	18.1
Erythrobacter dokdonensis DSM 17193	19.1	18.9	19.5	19.3	18.9	19.1	18.3	19.4	19.1	19	18.8	19	18.3	19.1	18.8	18.8	19.7	19.1	18.4	18.7	19.4	19.6	19.4	19.4	19	19.3	19	18.9	19.2	19.1	19	19.5	19.4	19.4	18.7	19.2	19.6	19.1	18.6	18.6	19.5	18.9	19	19.4	18.4	17.5	17.7	17.9	18
Erythrobacter donghaensis DSM 16220	19.3	19	19.2	19.3	19.2	19.5	18.4	19.8	19.4	19.2	19.2	19.1	19.1	18.9	19.4	18.6	20.6	18.9	18.7	18.9	19.4	19.2	19.4	18.9	19.2	19	19.4	19	19.5	19.6	18.7	19.3	19.1	18.5	18.5	19.1	19.8	19.1	18.8	19.2	19.3	19.1	18.8	19.8	18.6	17.8	18.2	17.9	17.9
Erythrobacter insulae JBTF-M21	18.9	19.7	19.5	19.1	19	19.9	18.5	19	18.2	18.8	18.3	18.2	19	18	18.5	18.4	19.2	19.2	19.1	18	20	19.2	19.5	20.2	18.2	19	18.3	19.3	18.7	18.5	18.5	18.8	19	19.7	19.2	19.1	21	19.2	18	18.4	19.2	18.6	17.8	18.8	19.1	19.5	20.5	18.9	21.7
Erythrobacter litoralis DSM 8509	19.1	19.2	18.7	19.7	19.1	18.8	17.9	19.6	18.9	18.8	18.8	18.6	18.6	18.7	19.4	19.2	21	20.1	18.8	18.4	19.2	19.7	19.3	19.4	18.4	18.7	18.8	19.2	19.2	19.6	18.6	19.5	19.4	19.1	18.9	19.4	19.8	19.2	18.9	18.7	19.4	18.8	18.7	19.4	18.9	17.8	17.6	17.7	17.4
Erythrobacter longus DSM 6997	19.4	18.7	21.4	19.8	18.4	18.8	20.5	20	18.8	19.2	19.4	18.5	18.4	19.7	20.6	19.4	20.5	25.3	18.5	18.9	20.2	20	18.7	18.7	17	18.9	20	22.8	18.8	19.3	18.7	18.4	21.1	18.6	20.4	19.2	21	20.3	18.6	18.9	19.4	17.9	18.3	19.1	19	20.8	21.1	17.7	17.7
Erythrobacter neustonensis DSM 9434	18.9	19	20.1	19.2	19.2	19.2	17.7	19.5	19.5	18.5	18.5	19.2	18.8	19.3	19.2	19.1	20.4	18.7	18.8	18.9	19.3	19.5	19.2	19.2	19	18.8	18.9	19.3	19.9	19.1	19	19.3	19.6	19.3	18.9	19.6	19.5	19.1	19.5	19.2	19.4	19.4	18.8	19.9	18.7	18	17.6	17.8	18.2
Erythrobacter ramosus JCM 10282	18.5	18.5	19.4	20	19.6	19.6	18.3	18.9	19.1	18.3	18.4	19	18.7	18.9	19.1	18.6	19.7	18.3	18.1	19	18.8	19.2	18.9	18.5	18	19.5	19	18.7	18.7	18.8	19.1	19.1	18.3	19.1	18.5	19.1	19.2	19.2	18.7	19	19.2	19	18.7	19.3	18.4	18.3	17.7	17.7	17.7
Erythrobacter rubeus KMU-140	19.8	19.9	19.6	19.7	19.2	19.1	18.3	18.7	19.2	18.9	18.8	19.1	19	18.3	18.8	18.9	21.3	19.7	18.7	18.8	19.8	20.1	19.3	19.3	18.7	19.8	18.8	18.8	19.4	19.3	18.7	19.9	18.8	19.1	18.8	19.1	20.3	18.9	18.5	18.9	19.6	19.1	18.9	19.8	19	17.7	17.8	17.5	17.6
Erythrobacter sanguineus JCM 20691	19.1	18.8	19	19.2	19.1	19	19.2	19.3	18.8	18.6	19	18.7	18.3	19.1	18.9	18.6	19.5	20.3	18.5	18.4	19.3	19.5	19	18.5	18.8	18.3	19.1	19.5	19.2	18.9	18.6	18.7	18.9	19	18.9	18.8	20	19.1	18.9	18.6	19.2	19.2	18.9	19.5	19.2	18.2	17.9	17.7	18.9
Erythrobacter tepidarius DSM 10594	19.9	18.9	19	19.6	19	19	17.9	19.1	19	18.4	18.7	20.1	18.6	18.5	18.9	18.3	20.1	18.4	18.4	19.4	18.8	19.2	18.8	18.3	18.3	19	19.1	19.9	18.7	19.1	18.9	18.6	18.8	19.4	18.8	19.4	19.8	18.7	18.3	18.7	19	18.8	18.9	19.5	18.5	17.4	17.6	17.5	17.6
Glacieibacterium frigidum LB1R16	18.4	18.5	18.9	18.3	18.1	17.8	18.5	18.6	18.1	18.1	17.5	17.7	19.9	17.8	17.9	19.3	25	18.3	18.2	18	18	18.4	17.8	18.9	19	18.4	17.9	18.6	18.5	18.2	18.4	17.8	17.5	17.8	18.8	17.9	18.8	18.4	18.1	18.6	18.3	18.2	18.4	19.1	18	32.8	37.4	22.2	34.1
Hephaestia caeni DSM 25527	18.1	19.3	19.4	19.4	19	19.3	18.6	19.4	19.6	18.8	19.6	19.4	19.1	19.2	18.8	18.7	21.7	20	18.9	19.1	18.9	18.7	18.7	19.5	19.2	18.8	18.9	19	18.5	19.1	18	18.8	18.2	18.5	19.1	18.6	19.4	18.8	19.3	18.9	18.7	19.1	19.5	30.2	18.8	18.7	18.8	18.4	19
Hephaestia mangrovi CMS5P-6	19.4	19.5	19.4	18.9	19.4	19.1	19.5	19.1	20	18	18.3	19.3	18.8	19.4	18.8	20	22	20	18.5	18.9	19	19.1	18.7	19.6	19.2	19.1	18.7	20.3	18.9	18.5	19.1	19	17.9	19.6	19.1	18.6	19.5	19.1	19.3	19.5	18.9	19.4	19.2	19.7	19.6	18.9	18.7	18.3	19
Novosphingobium acidiphilum DSM 19966	18.4	19.5	19.1	18.7	18.5	18.5	18.3	18.9	19.1	18.1	18.3	18.8	18	18.9	17.9	18.9	19.5	17.9	18.7	18.8	18.7	18.6	18.4	19.4	18.8	18.6	18.2	19.1	19.1	18.4	17.8	17.9	18	18.3	18.4	18.2	19	18.6	18.6	19.1	18.2	19.3	19.6	19.9	18.9	17.7	18	17.5	18
Novosphingobium aerophilum 4Y4	19.2	20.3	20	19.4	19.6	19.5	19.4	20.3	19.9	18.6	18.2	19.5	19.3	19.7	19.5	19	21.6	18.7	19.9	18.8	18.6	19.5	19	20.8	18.8	20.4	19.3	19	18.9	19.8	18.7	19.1	18.9	19.5	19.2	19.2	20.5	19.3	20.1	19.7	19.4	20	19.8	19.9	21.4	18.8	19	19	18.9
Novosphingobium aquimarinum M24A2M	19	18.7	19.6	19	18.9	19.2	19.5	19.9	19.5	18.4	19.5	19.1	19.4	19.5	19.2	21	21.2	22.1	18	18.2	20.5	19.2	18.8	18.7	18.9	19	18.9	20.1	18.9	19	19	18.7	19.6	19.2	20.8	19	22.4	20.1	19.2	19.2	19.7	19.6	19.4	19.7	19.4	18.2	18.1	18	18.2
Novosphingobium aquiterrae NCAIM B 02537	17.8	19.5	18.8	19	18.9	19.2	17.9	18.4	19.1	19	17.9	18.8	17.8	18.6	18.2	18.2	19.5	19.1	18.1	18.7	18.8	18.8	18.5	18.9	18.4	19.3	18.1	17.9	18.6	18.8	18.4	18.5	17.7	18.8	18.4	18.4	19.7	18.7	19.4	19.2	19	19.5	19.5	19.1	21.7	18	18.6	18.1	18.6
Novosphingobium aromaticivorans DSM 12444	19.4	19.8	21.1	18.9	19.2	19.9	19	20	21	19.4	18.7	19.9	18.9	19.1	19.5	19.2	20.2	19.5	18.7	19	20.3	19.3	19.4	20	19.2	19.2	19.1	19.9	19.1	19.1	19.2	19.2	19	19.3	18.7	19.5	20.2	19.2	19.8	19.8	19.6	19.6	19.9	20	20.2	18.6	19.1	18.7	18.6
Novosphingobium arvoryzae KCTC 32422	18.3	19.3	20.1	18.5	18.5	18.5	18.7	18.5	19.5	19.1	18.4	18.4	18.7	18.5	18.9	18.1	19.3	18.5	18.6	18.5	18.9	18.7	18.9	18.9	19.3	18.8	18.1	18.6	18.3	18.4	17.9	18.4	18.3	18.5	18.1	18.5	19.2	18.6	19.9	19.9	18.7	19.9	19.7	19.5	19.2	17.6	17.6	18	18.2
Novosphingobium aureum YJ-S2-02	18.7	19.5	20.1	19.6	19.4	19.2	20.2	20	20	20.2	18.9	19	20.2	19.1	19.6	19.5	23.4	19.3	18.6	19.9	18.8	19.6	19.7	19.9	17.9	19.2	19.1	19.9	19.3	19.4	18.4	19.5	19.6	19.5	19.5	19.4	19.9	19.6	19.5	19.3	20	19.8	19.3	19.9	20	18.8	18	18	18.7
Novosphingobium barchaimii LL02	19.7	20.5	20.4	19.5	19.8	19.3	20.7	19.8	20.3	21.1	20	20.2	21	19.4	19.7	20.1	21.3	26	19.6	20.2	19.3	19.7	19.6	22.5	19.6	20	19.2	20.9	19.3	19.4	20.5	19	19	20.5	19.6	19.4	20.4	19.8	20.4	19.7	19.8	21.3	20.4	19.9	20.1	18.8	18.7	18.9	19.1
Novosphingobium bradum KCTC 42984	19	19.7	20.2	19.1	19.1	19.1	18.8	19.6	19.2	20.1	19.1	19	18.8	18.9	18.8	18.9	19.9	19.1	19.1	18.4	19.1	19	18.9	20.8	19	19.3	18.4	18.4	18.8	18.9	19.5	19	18.6	19.1	19.1	18.9	19.9	19.5	19.6	19.4	19.3	19.3	19.9	20.1	19.6	18.6	18.1	18.4	18.4
Novosphingobium capsulatum NBRC 12533	19.2	19.3	19.8	18.8	19.2	19	18.8	19.6	19.9	19.2	18.4	19	18.1	19.2	19.4	19.5	19	18.7	18.2	19.3	18.8	19.3	18.7	19.1	19.3	19	18.8	19	19.3	19.1	18.8	18.9	18.3	18.8	18.9	18.9	19.5	19.1	19.4	19.2	19	19.5	19.5	19.7	19.5	18.2	18.2	17.7	18.1
Novosphingobium chloroacetimidivorans S00245	19.4	19.2	20	19.6	19.3	19.9	18.1	19.5	20.3	19.5	19.3	19.6	19.7	19.2	19	20.1	20.8	19.9	19.1	19.1	19.4	19.6	19.2	19.4	19.7	19.4	19.1	19.8	19.2	19.4	19.3	19.2	19.4	19	19.4	19.2	20.2	19.5	20.3	19.8	19.9	20.2	20.2	20.3	20.2	19.1	18.8	18.8	19.1
Novosphingobium clariflavum CICC 11035s	19	19.1	19.9	19.5	19.3	19.8	20.1	20.1	19.8	19.2	19.2	19.3	19.8	19.3	19.4	18.6	19.7	19.5	18.1	18.8	19.3	19.3	19.1	19	19	18.8	18.8	19.5	18.8	19.1	19.2	19.2	18.8	18.8	18.9	19.4	19.5	19	20.3	19.5	19.4	20.6	19.9	20.3	20.2	18.1	18.1	18	18.7
Novosphingobium colocasiae KCTC 32255	18.8	19.3	19.2	18.8	19.2	19.2	18.9	19.8	19.6	19.9	19.3	19.4	18.8	18.8	19.7	19.2	20.8	19.2	18.9	19.4	19.5	19.7	19.4	19.5	18.4	19.2	18.8	19.1	19.1	18.9	20	19.1	18.8	19.7	18.9	18.9	19.9	19.5	20.1	19.4	19.1	20.1	19.9	20.3	19.8	18.3	18.7	19.2	18.9
Novosphingobium decolorationis 502str22	19.2	20	21.1	19.3	19.8	19.3	21	20.2	20	20.2	19.9	19.1	20.2	19.5	19.4	20.1	21.2	24.9	19.5	19.7	21	19.9	19.5	19.4	19.9	19.7	19.6	20.6	20.1	19.4	19.7	19.8	19.1	19.8	20.7	19.4	21.7	19.9	20	19.1	20.1	20.5	20.3	20.6	20	18.7	18.4	18.7	18.7
Novosphingobium endophyticum CGMCC 1.15095	19.6	19.6	19.4	19	19.8	19	19.6	20.3	20	19.3	19	19.2	19.1	19.3	19.5	19.1	21.5	19.5	18.7	19.1	19.3	20	19.7	19.3	18.2	19.1	19.2	19.8	19.3	19.5	19.4	19.3	19.2	18.8	19.2	19.5	20.3	19.9	20.3	20.6	19.8	20.4	20.3	19.9	19.7	18.5	18.2	18.6	18
Novosphingobium flavum NBRC 111647	18.9	19.4	19.9	18.5	19.1	19	17.7	19.2	19.4	19.4	19.7	19.3	19.1	18.9	19.1	18.2	19.2	18.8	18.8	19.3	19	19.5	18.9	19.2	18.9	19.7	18.7	19.5	19.1	19	18.9	18.9	19	19.1	19.1	18.8	19.4	18.9	19.7	19.5	18.5	19.7	19.6	19.6	20.2	18.5	18.5	18.4	18.5
Novosphingobium fluoreni DSM 27568	19	19.1	19.4	18.7	19.1	19	19	18.9	20.1	18.8	19.3	18.8	19.3	19.1	19.5	19.2	20.5	18.6	19	19.1	18.8	19.2	18.8	21.4	19.7	18.9	18.5	19.2	18.8	19.6	19.4	19.2	19.2	18.8	18.9	19.4	19.7	19.2	19.6	19.1	19.1	19.5	19.7	19.9	19.7	18.9	19.2	18.3	19
Novosphingobium fuchskuhlense FNE08-7	19.1	19.3	19.7	18.7	19.1	18.9	18.5	19.4	19.8	19.2	18.4	18.7	18.7	19.1	19.4	17.9	19.8	18.9	18.9	18.7	18.8	19.5	19.1	19.1	18.8	19.4	19	19.1	18.8	19.4	18.8	18.9	18.4	19.5	18.7	19.1	19.6	19	19.3	19.6	19.3	19.3	19.7	19.5	19.4	18.3	18.5	18.3	18.6
Novosphingobium gossypii CCM 8569	19.7	18.6	19.9	19.1	19.3	19.1	18.5	19.7	20.1	19.9	18.9	18.8	20.5	19	19.4	18.9	20.8	18.4	19.1	18.7	19	18.9	19.6	20.9	18.6	19.1	18.4	20	18.9	19.1	19.7	19.1	18.9	18.8	19.1	19.2	19.7	19.1	19.8	19.3	19.8	19.9	20	20.9	19.4	18.7	18.1	18	17.9
Novosphingobium guangzhouense SA925	19	19.1	19.7	19.1	19	18.9	18.7	19.8	19.9	19.6	19.2	19	19.1	18.8	19.3	18.2	20.1	20.1	18.9	19.2	19.4	19.1	19.2	19	18.7	19.1	18.9	19.1	18.4	18.7	18.8	19.1	18.6	18.9	18.5	19.1	19.7	19.1	19.8	19.7	19.6	20.1	19.7	19.7	19.5	18.2	17.9	18.2	17.7
Novosphingobium hassiacum DSM 14552	18.7	19.3	20.4	18.7	19.2	19.3	19.1	19	19.5	18.5	19.1	18.8	19.5	18.6	19.1	18.5	20	19.2	18.9	19.4	19	19.7	18.8	18.8	18.5	19.3	18.9	19.3	18.6	19.4	18.8	18.6	18.8	19.1	18.6	18.9	19.8	18.8	19.4	21.5	19.2	21.1	19.4	19.9	20.4	18.3	18.2	18.1	18.2
Novosphingobium huizhouense c7	18.9	19.3	19.8	19.4	19.1	19	19.2	19	20.1	19	19.2	19.1	18.6	19	19	18.4	22.7	19.4	18.6	18.8	19	19.2	19	19.2	19	19.4	18.8	19.7	19.2	19.1	18.2	19.3	18.6	19.8	19.2	19.2	20	19.2	19.6	19.5	19	19.9	19.7	20.1	20.3	18.2	18.2	18.3	18.2
Novosphingobium humi KACC	19	19.6	19.6	19.3	18.7	18.8	19	19.3	20.1	18.8	18.7	18.9	20	18.7	19	18.1	19.4	19.2	18.8	18.4	19.7	18.6	19.3	19.9	18.1	19.4	18.7	19.1	18.7	18.8	18.1	18.6	18.8	18.9	18.9	18.7	19.5	18.9	19.3	19.9	18.9	19.3	19.6	19.2	19.2	18.1	18.4	18.3	18.1
Novosphingobium indicum CGMCC 1.6784	19	19.2	19.6	19.6	19.7	19.6	19.1	19.6	19.8	19.8	19.8	19.5	19	18.9	19.4	20.2	21.1	21.1	18.9	18.4	19.5	19.7	19.9	19.7	18.8	19.4	18.7	18.8	19.8	19.4	19.8	19.4	18.9	19.5	19.2	19.3	21.5	19.7	19.4	19.3	19.4	20.8	19.9	20	19.8	18.4	18.5	18.5	18.2
Novosphingobium ipomoeae KCTC 42656	19.1	19.8	19.5	18.6	19	19.3	18.6	19.8	20	19.3	19.8	18.9	18.4	19.1	19.1	19.1	20.6	19.4	18.2	19	19.8	19.1	18.9	19.6	19.4	19.4	20.2	19.1	18.6	19.2	19	19	18.4	18.5	18.6	19	19.6	19.1	19.3	19.7	19.1	19.6	19.5	20.1	19.8	18.9	18.3	18.5	18.1
Novosphingobium jiangmenense 1Y9A	18.9	19.5	19.8	19.2	18.7	19.6	18	19	20.7	18.9	18.7	18.7	18.5	19	19.1	18.6	19.6	18.2	18.5	18.6	19.1	19.2	18.9	19.3	18	18.5	18.7	19.8	18.9	18.7	18.2	18.6	18.7	18.9	18.2	19.6	19.6	18.7	19.5	19.3	19	19.7	19.4	19.5	20.2	18.1	18.1	18	18.3
Novosphingobium kunmingense CGMCC 1.12274	18.4	19.6	19.9	18.8	18.4	18.6	17.9	18.3	19.4	17.9	18.4	18.8	19.2	18.7	18.4	18.6	19.8	19.3	18.2	18	18.9	18.7	18.6	19.2	18.3	18.5	18.6	18.4	18.1	18.8	17.9	18.7	17.9	18.7	18.3	18.8	19.2	18.7	19.8	19.3	18.7	19.3	19.3	19.2	20	18.3	17.8	18.3	17.6
Novosphingobium lentum NBRC 107847	18.8	19	19.6	19.1	18.8	19.1	18.6	18.9	19.7	19.4	18.1	18.8	19.9	18.7	19.2	18.7	19.3	18.4	19.3	18.8	19	19.2	18.5	19.6	18.5	19	18.7	18.6	19.1	18.8	18.5	18.2	18.7	19	19	18.8	19.5	19.1	19.5	19.7	19.1	19.8	19.3	19.9	19.3	18.7	18.7	19.2	18.3
Novosphingobium lindaniclasticum LE124	19.6	19.2	20	20	19.4	19	20.2	19.9	20.5	19.8	20.3	19.4	20.3	19.3	19.3	19.3	21.2	21.6	19.5	18.7	20.4	20.5	19.7	19.5	19.4	19.6	19.2	23.1	19.4	19.1	20.4	19.7	19.3	19.7	19.4	19.4	20	19.9	19.9	20.1	20.6	20.1	20	19.8	20.3	18.7	18.6	18.6	18.6
Novosphingobium malaysiense MUSC 273	19.2	20.4	20	19.3	19.4	19.4	20.8	22.2	20.1	19	19.7	19.1	19.5	22	19.8	19.4	21	23.6	18.9	18.6	19.7	19.3	19.6	18.9	18.4	19.5	18.8	20	19.7	19.5	18.9	19.3	22.2	19.4	21.9	19.5	20.4	20.3	19.4	19.6	19.8	20.3	20.3	19.8	19.4	18.5	18.7	18.7	18.2
Novosphingobium marinum CGMCC 1.12918	21.4	19.4	19.9	18.8	19.5	19.6	23.5	20.4	19.8	18.9	19.3	18.6	19	18.6	19.3	18.6	19.2	20.5	18.9	18.8	21.4	18.8	19.3	18.3	19	19.5	19.1	31.2	18.6	19	17.8	18.7	19.1	18.9	19.9	18.9	23.1	21.9	18.8	19.1	20.2	20.1	19.3	18.8	19.3	18.5	18.3	18.1	18.4
Novosphingobium mathurense SM117	19.4	19.4	19.6	17.9	18.9	19	19.5	19.8	19.9	19.8	19.1	18.9	19.9	19	19.7	19	19.4	18.5	19	19.1	19.5	19.4	19.6	18.4	18.5	19	18.9	20	18.6	19.1	18.7	19.2	18.5	19.2	18.8	18.5	19.7	19.2	18.9	19.3	19.3	19.4	19.4	19.8	20.5	18.6	18.5	18.1	18.4
Novosphingobium meiothermophilum SYSU G00007	18.6	19.2	20.4	18.6	18.9	19.4	18.6	19.5	21.4	19	19.4	18.7	18.8	18.5	19.2	19	20.5	18.8	18.2	18.9	19.1	18.9	18.7	19	19.1	19	18.5	18.6	18.7	18.7	18.9	18.4	18.6	19.2	18.4	18.8	19.9	18.8	19.4	19.3	19.2	19.5	20	19.5	19.6	17.7	17.6	18.3	18
Novosphingobium naphthalenivorans NBRC 102051	19.6	19.3	19.9	19.6	19.5	19.6	19.3	19.8	19.8	20.6	18.9	18.9	19.5	18.9	19.3	18.7	20.1	19.4	19.3	19.2	19.7	19.6	18.9	19.6	18.8	19.2	19.1	18.7	19	19.3	19.1	19.4	18.7	19.1	18.9	19.3	21	19.6	19.6	19.7	20.3	19.9	19.8	27.4	19.7	18.7	18.7	18.5	18.3
Novosphingobium nitrogenifigens DSM 19370	19	20.6	19.6	19.3	18.4	19.2	19.2	19.3	19.9	19.7	18.7	19.4	19.7	19.3	19.7	20.1	20.2	20.2	18.9	18.8	19.9	19.5	20.1	21.1	19	18.8	18.9	20.2	20.1	19.5	20.6	19.5	19.1	19.8	18.6	19.6	20.6	19.2	19.9	20.5	19.6	20.6	20.7	19.5	20.1	19.1	18.6	17.9	19.3
Novosphingobium olei TW-4	19.2	19.5	20	19.1	19.1	19.7	19.6	19.3	20.6	19.8	19.3	19.7	19.3	19.3	19.4	20.1	21	19.3	19.3	18.6	19.5	19	19.4	19.1	19.1	19.7	18.8	19.6	19.3	19.2	18.8	19.1	18.9	19.1	19.3	19.4	19.9	19.3	19.6	19.7	19.6	19.5	19.9	19.8	21	18.2	18.3	18.3	18.4
Novosphingobium ovatum FSY-8	19.4	19.4	20.7	18.6	18.9	19.1	18.2	19.5	19.7	19.8	19.2	18.7	19.4	19.1	19.1	18.9	19.6	19.2	18.5	18.7	19.5	19.4	20.2	19.5	18.3	19.8	18.5	19.8	18.9	19.1	18.2	19.6	19	18.9	19.9	19	19.6	18.9	19.4	19.3	19.1	19.9	19.4	19.5	19.1	18.1	18	17.5	18.9
Novosphingobium panipatense CCM 7472	18.9	19	20.7	19.3	19.1	19.2	19	19.7	20.3	19.7	19.3	18.9	19.4	19.4	18.8	19.1	21.1	20.4	18.8	18.7	19.2	19.2	19.4	18.8	19	20.2	19.1	18.1	19.5	19.1	19.8	19	19	19.5	19.2	19.4	20	19.2	19.8	19.6	20	20.7	20.1	20.4	21.1	18.4	18.6	19	18.5
Novosphingobium pentaromativorans US6-1	19.7	19.7	19.9	19.5	19.2	19.1	20.2	21.5	19.8	20.9	19.8	19	19.7	21.2	19.6	19.8	20.8	25.4	19.3	19.6	19.7	20	19.3	19.7	19.8	19.6	19.4	21.8	19	19.2	19.6	19.3	21.8	19.8	21.1	18.9	23.3	20.6	19.3	19.9	19.8	21	20.4	20.3	20.7	18.3	18.8	19.1	19
Novosphingobium percolationis c1	18.5	19.6	20.6	19.1	18.8	19	19.4	18.9	19.9	18.7	18.7	18.6	19.2	18.9	18.8	19	19.6	19.1	18.1	18.4	18.8	19	19.5	19.1	19.1	19.3	18.3	19	19.1	18.7	19	19	19.1	19.2	18.8	19.1	19.6	19.3	19.6	19.7	19.1	19.6	19.4	19.5	19.2	18	18.2	18.6	18
Novosphingobium piscinae KCTC 42194	18.7	19.8	20.1	19.7	19.1	19.4	18.3	20	19.7	18.5	18.7	19.5	18.4	19.5	19.3	18.5	19.9	18.9	19	18.7	19.2	19.3	19.1	20	19.1	19.2	19.1	18.2	19	19.4	19.1	19	18.5	18.6	18.9	19.5	20.3	18.7	19.5	19.8	19.8	19.7	19.8	19.9	19.9	18.8	18.4	18.4	18.8
Novosphingobium pokkalii KCTC 42224	19.2	18.9	19.9	19	19.2	19.3	18.6	19.5	20	19.1	18	18.9	18.7	19.1	19.4	19.1	20	18.6	17.7	18.7	19.4	19	19	19.2	18.9	18.8	19.2	19.2	19.4	19.3	18.3	19.1	19	18.6	19.6	18.9	19.4	19.3	19	19.5	20.1	19.4	19.1	19.7	19.7	18.1	18.4	17.4	17.5
Novosphingobium resinovorum VKM B-1172	19.5	19.7	20.4	19.3	19.4	19.6	19.3	19.6	20.3	19.9	19.6	19.4	19.6	19.3	19.5	20.9	21.7	20.6	19.3	20.2	19.3	19.6	19	19.5	19.7	19.8	18.8	20.3	19.2	19.4	19.9	18.9	19.4	19.5	19	19.8	19.8	19.4	20	20.2	19.9	20.4	19.9	20.8	19.9	19	18.8	19	18.9
Novosphingobium rhizosphaerae CCM 8547	19.8	19.7	19.5	19.3	19.3	19.3	19.3	19.7	20.4	19.9	18.8	19.1	19.1	18.9	19.1	19.1	19.3	19.1	18.3	19.1	19.2	19.3	19.4	19.1	19.3	19.2	18.6	19.9	19.6	19.3	18.8	19.6	19	18.7	19.3	19	19.8	19.3	19.3	19.6	19.7	19.5	19.4	20	19.7	18.4	18.4	17.7	18.1
Novosphingobium rosa NBRC 15208	19	19.2	19.3	19	19.1	19.3	18.9	19.6	20.3	20.7	19	19.3	19.7	19	18.6	19.2	19.9	18.7	19.5	19.4	19.2	19.1	18.8	18.9	18.6	19.4	19.1	18.7	19.2	19.6	19.2	19.2	18.7	19.5	19.1	19.2	19.3	18.9	19.5	19.3	18.8	19.5	20.2	19.7	19.3	18.4	18.1	18	18
Novosphingobium sediminicola NBRC 106119	18.5	19.5	19.3	19	18.7	18.6	18.3	19.6	19.6	18.6	18.5	18.6	18.8	18.5	18.8	18.1	19.3	18.8	19.2	19	18.7	18.6	19	19.9	18.5	18.8	19	18.1	18.6	18.6	18.9	18.7	18.7	18.7	18.9	18.7	19.2	18.5	19.1	19.4	18.6	19	19	19.5	19.4	18.2	18.9	17.9	17.8
Novosphingobium silvae FGD1	19.6	19.7	20.1	18.9	19.2	19.8	18.4	20.3	20.8	19.5	19.9	20	20	19	20	18.7	21.6	20.5	19	19.2	19.9	20	19.2	19.7	19.2	19.4	19.1	19.7	19	19.5	19.1	19.7	18.9	19.7	19.7	19.3	20.1	19.1	20.4	22	19.6	24.4	19.9	21	19.4	18.5	19	19	18.8
Novosphingobium soli CCM 7706	20.2	20.5	20.1	20.3	21.3	22	19.8	21.7	22.7	19.9	20.4	20.7	20.4	20.9	21.1	19.4	21.3	21.8	19.4	20.3	21	20.7	21	20.2	19.8	20.4	21	20.1	20.2	21.5	20	21	20.2	20	21.1	21.2	21.8	20.9	21.3	20.6	21.3	22.3	21.7	22.2	21.7	19.5	19.5	19.8	19
Novosphingobium subterraneum DSM 12447	18.7	19.3	20.3	19.4	18.7	20.2	19.9	19.7	21.9	18.1	18.4	18.6	18.1	19.8	19.6	19	19.8	18.8	18.2	18.8	19.1	19.3	18.7	19.5	18.6	19.3	19.3	19.1	18.6	19	18.4	18.8	18.4	18.9	19	19.2	19.7	19	19.6	20.5	19.7	23.6	20	19.8	20.7	18	18.5	18.3	18.8
Novosphingobium taihuense CGMCC 1.3432	18.6	19	20.1	18.9	18.9	19.5	18.6	19.2	21.1	17.5	18.4	18.6	18.7	18.7	18.7	19	21.5	18.7	18.2	18.6	19.3	18.9	18.9	19	18.7	19.1	18.4	20.5	18.7	18.3	18.7	18.6	18.7	18.7	18.2	18.9	19.4	19.6	19.2	19.6	18.6	19.2	19.7	19.9	19.4	18.6	18.2	18.1	18.7
Novosphingobium umbonatum FSY-9	19.1	19.4	19.4	19	18.4	19.1	18.6	19.3	19.6	19.9	18.8	19	18.7	19.1	19.2	19.1	20.3	19.4	18.4	18.1	19.3	19	19.3	19.4	19.3	19.3	19.1	18.9	19.2	18.2	19.2	19.3	18.7	19.2	18.9	19.5	19.7	19.1	19	20.2	18.9	19.6	20.2	19.6	19.3	18.2	18.6	18.9	18.5
Novosphingopyxis baekryungensis DSM 16222	20.5	18.6	19.1	19.7	19.1	19.2	20.4	24.1	19.2	18.4	19.5	18.6	20	21.7	19.5	18.1	19.9	25.5	19.3	19.8	19.7	18.8	18.8	21	18.6	19.6	19	22.7	18.8	18.6	18.5	19.2	21.8	18.9	22.4	19.3	20.3	20.9	19	19.5	19.3	19.8	19.1	19.5	18.4	17.8	18.1	18.8	18.5
Novosphingopyxis iocasae PB63	20.5	19.2	19.1	19.7	19.7	19.2	22.7	24.3	19.2	20.7	19.8	18.7	20.7	22.2	20.2	19.5	20	24.7	18.4	18.7	23.4	18.8	19.4	19.8	19.7	19.3	18.5	21.7	19.5	19.4	19.4	19.2	22.5	19.4	24.2	19.2	25	22.2	18.6	19.1	19.1	18.9	19.4	19.6	18.6	18.3	19.3	18.3	18.1
Pacificimonas flava JLT2015	18.3	18.2	18.7	18.7	18.6	22.1	23.8	22.8	18	19.7	18.3	18.6	19.6	18.8	18.7	17.9	21.3	21.3	18.6	18.6	22.7	18.8	19	19.7	17.9	19.2	21.1	23.7	17.9	19.4	19.1	18.4	19	18.5	23.4	18.9	22.9	24.1	18.1	18.3	20.6	20.9	18.4	19.2	18.7	18.3	17.9	18	17.9
Parapontixanthobacter aurantiacus MCCC 1A09962	20.5	19	19.6	19.8	19.6	18.8	21.4	18.5	19.1	18.6	18.7	18.9	19.7	19.2	20.4	19.1	20.1	19.6	18.5	19.2	20	19.8	19.7	19.7	18.1	18.9	18	20.1	19.6	19.1	19	19.5	19.1	18.9	19.2	19.2	20.1	27.2	18.8	19.1	19.5	18.6	19.4	20.2	18.8	18.2	18.6	18.7	19.2
Parasphingopyxis algicola JCM 31719	18.6	18.7	18.7	18.6	18.5	18	19.1	18.6	20.1	17.7	18.2	18.8	18.7	18.5	18.6	19.2	21.5	18.7	19.7	19	18.2	18.9	18.9	17.8	18.8	18.8	18.5	18.8	18.4	19	18.2	18.6	19	19	18.8	18.2	20	18.7	18.9	19	19.1	18.9	19.3	19.5	18.8	17.8	17.7	17.8	17.8
Parasphingopyxis lamellibrachiae DSM 26725	19.2	18.7	18.4	19.3	19.2	19.1	18.6	18.8	18.3	22.6	19.7	18.8	18.4	18.4	18.9	18.1	22.2	18.2	19.6	19.8	19.5	18.9	18.5	18.2	18.4	19.7	18.6	20.3	19.1	20.1	18.6	19.2	19.7	19.3	20.1	19.7	19.6	20.2	19.3	18.9	18.5	18.7	19.7	20.9	18	18.7	18.4	18.1	18.1
Parasphingopyxis marina GrpM-11	18.2	18.6	19.1	18.7	18.6	17.7	19	18.8	18.4	20.2	19.1	18.3	19.4	18.3	18.8	18.9	20.3	18.1	18.9	18.7	18.7	19.1	18.6	18.7	17.9	18.7	18.3	19.3	19.2	18.5	18.4	18.9	17.9	19.4	18.8	18.9	19.6	19.1	18.9	18.3	18.1	18.9	18.3	18.8	18	18.2	17.6	18.6	17.6
Parasphingorhabdus cellanae JHSY0214	22.1	25.4	20.2	19.5	21.5	20.2	21.4	20.9	21.9	18.8	19.4	21.3	19.1	19.1	20	19.4	23.4	20.4	20.9	20.6	22	20.8	21.1	18	19.4	19.1	28	22.9	21.2	20.1	18.8	20.4	20.4	21.5	24	22	25.3	21.9	20.8	19.4	25	18.3	19.1	22.2	19	28.6	25.8	20.4	23.4
Parasphingorhabdus flavimaris DSM 16223	19.6	18.9	18.7	20	18.5	18.4	21.6	18.5	18.9	18.7	19.9	19.2	19.1	18.6	18.5	19.4	23.1	19.4	19	18.4	19.5	19.1	18.5	18.8	19.3	20.9	18.3	20.7	19.6	18.7	18.4	19.3	18.4	19.9	19	18.3	19.2	19.7	18.9	19	18.7	18.8	18.6	20	19	18.4	18	18.5	18
Parasphingorhabdus litoris DSM 22379	22.9	22.5	18.1	18.5	19.6	18.5	20.7	21.6	20.5	20.6	19.2	22.3	21.9	19.9	21.2	20.4	21.6	18	20.6	20.2	22.6	21.2	20.4	18.9	18.8	19.7	24.7	20.1	23.7	23.8	17.8	21.3	20.6	19.3	22.8	19.6	23.5	21.3	19	18.6	20.9	18.6	17.7	20	19.4	18.2	17.7	23.2	19
Parasphingorhabdus marina DSM 22363	20.4	19.5	19.9	19.8	19	20.3	20.7	19	19.2	20	18.7	18.9	18.9	18.8	20.4	19.7	23.5	20.4	20	18.6	20.1	20.6	19.8	19.5	18.8	19.6	18.5	20	20.2	19.2	19.1	20.9	19.7	20.6	19	20.5	19.8	22.2	18.5	19.2	21.4	18.3	18.8	19.5	18.8	18.2	18.6	18.8	18.9
Paraurantiacibacter namhicola JCM 16345	19.6	19	19.2	18.9	19	18.7	18.9	19.4	18.8	19.9	19.9	18.6	19.6	18.5	19.3	18.2	18.6	18.5	19.1	19	19.9	19.8	19.7	19.4	18	19	19	18.8	19.1	19.4	18.8	19.4	19	19	19	18.8	19.3	19.3	19.5	19.6	19.6	19.3	19	19.2	19	18.1	18.3	18.3	18.3
Parerythrobacter jejuensis JCM 16677	19.2	18.9	20.3	19.3	19.3	19.2	18.4	18.1	18.6	18.7	18.7	18.2	18.8	18.4	18.7	18.4	20	19.2	19.1	18.4	18.9	20.2	18.5	19.3	19.5	19.8	18.4	19.2	18.8	18.9	18.8	18.7	18.5	18.9	19.7	18.9	19	18.3	19.8	20.1	19	20	20.2	18.6	19.6	19.6	19.7	19.2	21
Parerythrobacter lutipelagi GH1-16	19.2	18.1	19.4	19.3	19.9	19.1	23.3	19.4	18.8	18.7	18.9	18.3	19.1	19.2	19.8	18.4	20.2	19.5	19	18.5	19.9	19.7	19.7	18.5	19.1	19.3	19.2	19.5	19.1	19.2	18.9	19.3	19.1	19.4	19.7	18.8	20.2	24.3	18.5	18.9	20	20	18.7	19.4	18.1	17.3	18	18.3	17.5
Pedomonas mirosovicensis A1X5R2	19.1	18.6	20	19.4	18.9	18.9	22.3	19.6	19.7	22.4	19.6	19.4	20.6	18.5	19	20.2	23.2	21.5	20.1	20.5	19.1	20.3	19.3	21	19.9	20.7	18.1	24	19.3	19.1	20.2	19	19	20	20.1	18.6	18.4	18.8	18.7	18.5	19.3	19.1	19	20.1	19.3	18.5	18.2	18.6	18.5
Pelagerythrobacter aerophilus Ery1	20.1	19.2	19.6	18.9	19.2	18.8	18.4	19.6	19	18.9	18.6	18.5	19.1	19.1	19.6	18.7	19.4	20.5	19.1	18.8	20.3	19.4	19.9	19.9	18.7	19.1	18.9	20	18.5	19.3	18.1	19	19.1	18.8	20.7	19.3	21.9	20.4	19.6	19.4	19.4	20	19.3	18.6	18.9	18.3	18.4	18.5	18.9
Pelagerythrobacter marensis KCTC 22370	18.5	19.3	19.1	19	18.9	18.7	17.9	19.5	18.7	19.3	19.1	18.6	19.2	18.5	19.3	18.3	20.9	18.8	18.4	18.4	19.6	18.9	19.3	19.7	19.1	19.6	18.6	19.2	18.3	18.9	19.3	19.3	19.2	18.6	18.8	19.1	19.4	19.6	18.9	19.2	19.5	19.4	19.4	18.7	19	18.3	18.1	18.6	18.5
Pelagerythrobacter marinus H32	19.3	19.5	19	19.4	19.3	18.7	20.2	19.8	18.8	19.8	19.2	18.9	18.5	18.9	19.4	18.8	19.2	20.9	18.9	18.9	20	18.3	19.6	19.6	18.4	19.5	19.1	20.5	19.1	19.3	18.6	19.3	19	19.1	20.1	19	21.4	21.5	19.3	19	19.8	19.7	19.6	18.8	19.6	18.1	18	18.7	18.5
Pelagerythrobacter rhizovicinus AY-3R	19.4	19.5	19.2	19.2	19.2	18.8	17.8	19.4	19.3	18.1	19.1	19.1	19.2	18.5	19.2	18.8	19.9	18.9	18.5	18.6	19.4	18.6	19.9	19.1	19.5	19.1	19.1	18.5	19	19.8	18.2	19.1	18.9	19	19.5	19.2	20.4	19.3	19.2	19.4	19.9	19.4	19.6	20	19.1	18.3	18.6	18.5	18.5
Polymorphobacter arshaanensis DJ1R-1	17.9	18.4	19	19.1	17.2	18.2	17.9	18.3	18.8	18.2	17	18.5	17.7	18.2	18.1	18.5	22.1	20.4	18.1	18.7	18.4	18.8	18.3	18.5	18.8	17.9	17.7	18.2	17.7	17.9	17.4	17.8	17.9	18.6	18	17.3	18.5	17.4	18.6	18.2	18	18.5	18.3	18.5	18.4	19.6	19.5	19.6	19.7
Polymorphobacter fuscus D40P	19	18.3	19.2	18.1	19.2	18.7	20.1	18.7	18.2	19.5	18.9	17.5	19.2	17.4	18.2	19.2	21.3	19.1	18.8	18.2	18.3	18.6	17.4	19.4	19	18.6	18.2	20.5	18.2	18	19.5	18.3	19.2	18.5	18	18	18.9	17.4	18.5	18.3	18.1	18.1	18.1	19.1	18	19.2	19.1	19.1	19.1
Polymorphobacter glacialis CGMCC 1.15519	18.1	18.1	18.8	19.7	19	17.6	19.7	19.2	18.6	20.6	19.2	18.6	20.1	18.1	18	18.7	23.4	20.4	18.2	18.9	18.4	19.1	17.7	19.4	19.9	18.4	17.7	18.6	18.7	17.2	17.7	18	18.4	18.2	18.4	18.3	19.3	18.4	18.7	19.1	18	18.3	18.7	18.9	18.7	19.7	19.4	19.4	19.4
Polymorphobacter megasporae PAMC 29362	18.3	17.9	18.9	18.2	17.9	18.6	18.4	19	18.7	19	18.9	17.7	18.9	18.5	18	19.6	21.5	19.5	19.1	18.5	18.1	18.3	18	18.3	18.7	18.5	18	21.6	18.9	17.7	18.8	18.8	18.9	18.4	18.7	17.9	18.5	18.1	18.1	18.1	17.6	18.1	18.2	19.2	18.2	19.8	19.8	19.7	19.9
Polymorphobacter multimanifer JCM 18140	18.3	18.4	19.2	18.7	18.5	18.3	18.1	18.8	18.5	20.6	18.9	17.4	20.2	18.4	17.6	18.2	23.9	20	17.8	17.8	18.2	19.1	18	20.1	18.4	17.8	18.6	19.3	18.2	18.1	17.5	18.3	18.1	17.7	18.2	18.4	18.7	18.2	18.5	18.3	18.6	18.5	18.2	19	18.3	19.1	18.9	19.6	19.3
Pontixanthobacter aestiaquae KCTC 42006	18.4	20	18.6	19.1	18.8	19.1	18	18.1	18.6	19	18.2	18.8	18.7	19.1	18.7	18.4	19.2	18.7	18.4	18.5	19.2	19.2	19.3	18.6	17.7	18.7	18.5	17.8	18.6	18.2	18.2	17.5	18.7	19	18.5	17.7	19.4	18.3	18.3	18.6	19.1	18.3	18	18.8	18.6	19.3	18.3	18.1	20.1
Pontixanthobacter aquaemixtae KCTC 52763	18.4	18.8	18.7	18.5	18.6	18.6	19.2	19.3	18.3	18.1	18.2	18.6	18.5	19.4	17.9	18.4	19	20	18.6	18.3	19.4	19.5	18.9	17.9	17.8	18.8	18.4	19.7	18.9	18.6	18.9	18.9	20	19	19.6	18.5	20.7	18.4	18.1	18.8	19.5	18.8	19	18.2	18.5	17.9	17.9	19.2	18.8
Pontixanthobacter confluentis KCTC 52259	18.4	19.1	20	19.4	18.4	18.2	18.8	18.5	18.7	18.8	18.1	18.4	19	19	19	18.1	19.3	19.9	18.4	19	19	19	19.3	17.9	19.4	18.8	18.9	22.2	17.9	18.3	19.1	18.2	18.9	18.4	19.3	18.5	19.3	18.7	19.2	19.4	18.8	18.8	18.7	19	18.7	20.8	18.5	20	20.1
Pontixanthobacter gangjinensis JCM 17802	17.6	19.8	19.9	18	17.7	19.3	18.5	17.5	17.5	18.2	18	18.1	17.6	18.5	18.2	18.1	19.8	18.7	18.2	18.3	19.8	18.8	18.4	19.4	18.3	18	17.3	17.6	17.6	17.7	18.4	17.3	18.3	19.2	18	19.1	19.5	18.5	18.4	18.7	18.1	18.8	18.9	19.4	17.9	18.7	20.1	18.6	20.2
Pontixanthobacter luteolus SW-109	18.7	20.6	19.6	18.7	19.6	19.1	19.1	18.7	19.6	18.8	18.6	19	18.5	18.4	18.8	19.3	19.9	19.5	19	18.9	19.7	18.7	19.5	20.6	19.1	19.1	18.5	18.7	19.4	19	19.7	19.6	19.3	19.5	19.7	19.8	20.3	19	18.7	19.9	19.9	20.1	19.6	20.5	19.7	19.5	19.5	19.3	19.2
Pontixanthobacter rizhaonensis RZ02	17.4	24.9	20.2	17.7	17.6	18.8	18	18.1	17.5	19.5	18	17.8	17.8	17.7	18	18.4	20.2	18.6	18	18.6	20.1	19.1	18.8	21.6	18.8	18.5	19	17.8	18.3	18.2	18.1	17.8	18.3	17.8	18.1	17.8	19.9	19	18.7	20.2	18.3	19.5	18.9	18.7	19.3	20.6	18.8	23.3	22.5
Pontixanthobacter sediminis KCTC 42453	18.3	19.1	19.1	18.5	18.8	18.6	18.1	18.7	18.3	17.8	17.8	17.8	18	18.3	18.5	18.9	20.3	19	18.2	18.2	18.6	19.3	18.6	18.9	18.6	18.8	18.4	18.2	18.4	18.7	18.1	18.4	18.3	19.1	19.1	18.3	18.9	18.3	18.2	18.7	18.9	18.7	18.9	19	19.2	17.3	17.3	17.9	17.6
Pseudopontixanthobacter vadosimaris JL3514	18.2	18.7	18.5	18.8	18.6	20	24.9	20	18.7	19	19	18.6	19.2	18.9	20.9	19.2	19.6	19.5	19	27	21	19.2	19.2	17.8	18.1	19.1	19	20	18.8	19.1	18.4	18.8	19	18.6	19.6	18.4	20.3	22	18.4	18.9	19.3	20.3	18.9	18.5	18.1	18.8	18.3	18	18.8
Qipengyuania aerophila GH25	19.2	19.7	19.5	19.3	19.2	19.1	19.6	19.9	18.7	18.8	18.6	18.7	18.8	20.9	19.6	19.9	20.4	25.5	19	18.4	20.8	19.1	19.8	19.3	18.5	19.2	18.4	19.3	19.3	18.8	19.3	19.2	21.2	20	23	19.3	22.8	19.9	19.6	19.2	19.8	19.4	19.6	19.4	18.5	18.5	17.9	18.9	18.6
Qipengyuania aestuarii GH1	19.4	18.5	18.6	19.2	19.6	18.7	18.2	19.7	19	18.7	19.9	18.3	19.1	19	19.9	18.7	19.8	19.8	19.1	19.3	21	20.1	20.3	19.7	17.9	19.1	18.9	18.9	19.3	19.4	19	19.1	19.3	19.3	22.4	19.5	21.9	19.8	19	19.2	20	19.1	19	19.4	18.7	18.8	17.9	19.8	18.2
Qipengyuania algicida KEMB 9005-328	19.4	19.5	19.3	19.3	19.5	19.1	18.3	19.3	18.8	19.2	18.9	18.8	19.1	19.1	19.2	18.5	19.2	19.2	18.2	19.3	19.6	18.8	19.8	20.2	18.1	19.5	19.3	18.9	19.5	19.2	18.4	19.1	19.1	19.6	19	19.3	19.7	19.3	18.7	19.3	19.6	19.2	19.2	19	18.2	18.8	18.5	18.3	19
Qipengyuania aquimaris JCM 12189	19.1	19.1	19.7	19.1	19.3	18.2	17.8	19.6	19.1	18.2	18.4	18.6	18.7	18.9	19.5	18.7	19.8	19.3	18.4	18.9	19.8	19.3	19.6	18.6	17.7	18.7	18.4	18.6	19.4	19.4	19.2	19.8	18.7	20	18.8	19.3	20.2	19.5	19.1	19.2	19.8	19.2	19.3	19.7	18.8	18.3	17.7	18.4	17.9
Qipengyuania aurantiaca 1NDH13	19.2	18.7	19.2	19.5	19.3	19.2	19.6	21.3	19.5	18.9	19.4	18.8	18.8	20.5	19.8	20.5	20.9	29.2	18.8	18.5	20.3	20	19.8	19.4	18.6	19.4	19.6	20.1	19.2	19.6	19.6	19.6	21.6	19.5	20.5	19.4	19.8	20.7	18.8	19	20.3	19.8	19	20.1	18.7	18.6	17.7	18.6	18.1
Qipengyuania citrea CGMCC 1.8703	20.5	19.1	19.7	19.4	19.1	18.8	18.9	19.7	19.4	19.9	19	19	20.5	19.1	19.7	19.5	20.1	20.7	19.3	19	19.9	20.1	19.7	20	19.2	19.2	18.8	22.9	19.3	19.5	19.7	19.6	19.4	20.3	19.8	19.2	20.4	20.4	19.5	18.8	20.1	19.5	19	19.1	18.8	19.6	19	18.5	18.7
Qipengyuania flava DSM 16421	19.2	19.2	19.2	19.3	19	19.2	17.9	19.4	19	18.6	18.7	18.5	18.4	19.3	19.6	19	19.8	18.7	19.1	18.6	19.7	19.3	19.6	19.4	19.2	19.7	18.9	18.6	18.9	19.1	18.7	19	19.1	19.5	19.7	19.1	19.8	19.7	18.7	18.7	19.9	19	18.7	18.7	19.3	18	17.9	18.1	18.1
Qipengyuania gaetbuli DSM 16225	19	19.1	19.3	19.1	19.6	19	18.1	19.7	19.2	18.5	19.2	18.9	18.9	18.8	19.5	19.6	19.4	19	18.6	18.7	19.5	18.9	19.4	18.8	18.7	19.2	19.1	18.4	19.2	19.7	19.3	19.4	19	19.7	19.2	19.5	19.7	19.5	19.1	19.4	19.5	19.8	19.8	19.5	18.7	18.4	18.7	17.8	18
Qipengyuania gelatinilytica 1NDH1	18.8	18.7	19.3	19.2	19.2	19.2	18.1	19.9	19.1	18.8	19.1	18.8	19.3	18.6	19.4	19.1	20.7	19.1	19.7	19	19.6	20.4	19.9	19.4	19.2	19.3	18.9	19.3	19.6	19.7	19.4	19.5	19.5	19.8	19.1	19.5	20.1	19.8	19.3	19.3	19.5	19.5	19.2	20.3	18.8	17.7	17.9	17.7	17.9
Qipengyuania huizhouensis YG19	19.3	19.1	18.9	18.9	19.3	18.7	18	19.3	19.2	18.6	19.2	19.6	19.8	19.2	19.6	19.1	19.9	19.9	19	19	20.1	20	20	19.6	18.2	19.2	19	18.8	19.9	18.9	18.6	19.7	19.6	19.9	19.6	19.5	20.1	19.7	19.8	19.2	19.7	19	19.5	19.4	18.9	18.9	18.8	18.6	18.8
Qipengyuania intermedia GH38	19	19.2	20	18.7	19.3	18.8	18.8	19.5	19	18.4	18.5	18.3	18.9	18.9	19.5	19	20.4	19.4	18.9	18.7	21.2	19.6	20.1	18.6	18.2	19	18.9	18.7	19.4	19.2	19.1	19.5	19	19.5	21.2	19.5	21.1	20.2	19.1	18.5	20.1	20.1	19.2	19.8	18.9	18.5	18	18.4	18.4
Qipengyuania marisflavi KEM-5	18.9	19.4	18.6	18.7	18.9	18.9	23.2	19	18.6	18.4	17.9	18.1	17.9	18.5	21	18.3	19.3	19.7	18.7	18.7	20.1	18.9	19.2	18.6	18.4	18.2	18.9	19	18.7	18.3	18.6	18	18.7	18.9	19	18.8	20.2	21.5	19.2	19.1	18.9	19.4	18.9	19.1	18	17.9	18.1	18.1	18.3
Qipengyuania mesophila YG27	20.9	19	19.8	19.5	19.7	18.9	20.2	20.6	18.8	19.4	19	19.1	19	20.2	19.9	19.2	19	23	18.5	19.1	20.4	19.8	20	20	19.7	19.7	19.1	19.8	19.5	19.6	19.5	19.6	20.9	19.8	21.9	19.5	21.5	20.7	19.5	18.8	19.8	19.3	19	19.8	18.8	18.3	18.3	18.9	18.2
Qipengyuania nanhaisediminis CGMCC 1.7715	19.5	19.2	19.6	18.9	19.5	19.1	21.7	19.7	19.4	18.7	18.7	18.8	19	19.4	20.2	18.8	19.7	20.5	18.7	18.9	20.1	19	19.9	18.3	18.3	18.6	19.3	20.2	19.5	19.1	18.7	19.5	19.3	20	19.7	19.2	21	21.7	19.2	19.3	20.4	20	19.5	19.1	19.1	18.5	17.7	18.7	17.8
Qipengyuania oceanensis MCCC 1A09965	20.5	19.3	19.2	18.9	19.5	18.4	18.7	19.4	18.9	18.6	18.7	18.8	18.8	19.6	20	19.3	20.1	19.1	18.8	18.2	20.7	18.1	19.8	19	19.1	18.9	18.4	19.5	19.4	19.2	19	18.8	18.9	19.5	21	19.1	21.6	19.9	19.2	19.2	19.9	19.2	18.8	18.7	19.1	18.3	17.7	18	17.9
Qipengyuania pacifica NZ-96	21.3	19.5	19.5	19.5	19.6	19.1	19.3	19.6	18.9	18.6	18.7	19.8	18.7	19.9	19.4	19.2	20.2	21.9	18.8	18.5	20	19.2	19.2	19.4	18.5	19	18.7	20.6	19.4	18.9	19.3	19.2	19.7	20.2	21.2	19	27.2	21.4	19.6	19.8	19.5	20	19.3	19.2	19.7	19.1	18	18	19.5
Qipengyuania pelagi JCM 17468	20.1	18.5	18.8	19.5	19.3	20.1	19.3	20.1	18.9	19	18.9	18.8	19.5	18.7	19.7	19.3	19.7	20.5	18.7	19.2	21.1	19.2	19.9	19	18.7	19.2	19.7	20.7	19.1	19.6	19.3	19.3	19.5	19.8	20.1	19.3	22.3	21.8	18.9	18.9	20.5	20	19.2	19.6	17.9	18.1	18.3	17.9	18.3
Qipengyuania polymorpha 1NDH17	19.1	18.8	19.9	19.3	19.6	19.3	23.5	20.2	19.4	18.5	19.1	18.9	19	19.1	20.5	18.9	19.9	19.4	18.9	19.4	20	20.3	19.6	18.6	18.3	19.3	19.6	18.6	19.5	19.8	19.1	19.4	19.5	19.7	19.5	19.3	19.7	20.9	18.9	18.7	20	19.7	19.2	19.6	19	18.3	17.5	17.7	18.3
Qipengyuania proteolytica 6B39	19.3	18.9	19.7	19.1	18.9	18.8	18.8	20.5	19.2	18.2	18.7	18.9	18.7	20.4	19.9	19	19.6	22.9	18.6	18.8	19.6	19.9	19.8	18.3	18.3	19.3	19.2	19.8	19.3	19.7	19.3	19.6	20.7	19.5	19.9	19.5	20.2	20.2	18.9	18.7	19.7	18.6	19	19	18.5	18	17.8	18.2	17.3
Qipengyuania psychrotolerans 1XM2-8	18.7	18.8	19.6	19.4	19.4	18.9	18.5	19	19.2	18.8	18.7	18.9	18.5	18.6	18.8	19.3	21.1	19	18.6	18.8	19.9	19.8	19.9	18.8	18	19.1	18.6	18.4	19.3	19.2	18.8	19.2	18.9	19.8	18.6	18.9	20	19.1	18.9	19.4	19.5	19.7	19.6	19.2	18.9	19.6	20.3	19	19.5
Qipengyuania qiaonensis 6D47A	19.6	19.7	18.7	19.4	19.1	19.1	19.7	20.5	18.9	18.5	19	19.2	18.8	21.6	20.1	19.6	19.6	23.5	19.1	18.8	19.9	19.9	19.6	19	18.3	19.8	20	20.6	19.4	19.5	19.2	19.5	22.2	20.1	20.9	19.2	20.3	20.9	18.9	19.4	19.8	19.2	19.3	19.5	18.9	18.8	18.4	19.8	18.5
Qipengyuania sediminis CGMCC 1.12928	18.4	19.1	18.8	19.6	19.5	19.2	18.3	18.8	19	18.6	18.6	19	19.8	19.4	18.5	19	20.2	19.5	18	18.2	18.8	18.2	19.5	19.8	17.6	19	19.5	18.7	18.6	19.9	18.5	18.9	18.9	18.7	19.1	19.1	19.1	19.2	19	18.8	19.4	18.8	19	20.1	18.5	18.2	18.4	18.2	18.1
Qipengyuania seohaensis SW-135	19	19.1	19.8	19	19.2	18.9	20.9	19.5	19.3	18.2	18.2	18.3	18.6	18.6	20.2	19.5	19.9	19.7	18.5	18.7	20.4	19.4	19.4	18.4	18	19.4	18.7	19.4	19.2	19.5	18.7	19.3	19.4	19.9	18.9	19.5	19.8	19.8	19.2	19.2	20.1	19.6	19.3	19.6	18.4	18.4	17.9	18.3	18
Qipengyuania soli 6D36	19.3	19.4	19.8	19.3	19.9	19.1	18.9	19.5	19.3	18.4	18.9	19.5	19.5	19.3	19.1	19.4	20.1	20.4	18.4	18.7	19.4	19.9	19.7	18.5	18.3	19.3	19	18.5	19.6	19.2	19	19.4	19	19.6	18.6	19.4	19.8	19.4	19.3	19.2	19.7	19.3	19.3	20.1	19.2	18.2	18.5	18.4	18.6
Qipengyuania sphaerica GH29	19.3	18.6	19.1	19.1	19.3	18.6	19.4	19.8	18.8	19.3	19.7	18.4	19.3	18.5	19.4	18.7	19.7	19.5	19.3	18.8	19.8	20.1	19.4	18.8	18.3	19.3	18.8	18.7	19.1	19.5	19.2	19.5	19	19.6	19.1	19.6	20	19.3	18.9	18.9	19.8	19.3	19.1	19.8	18.8	17.5	17.6	18.4	17.4
Qipengyuania vesicularis 1NDH10	19.3	19.1	19.8	19.1	19.2	19.3	18	19.5	19.2	18.5	19.4	19.1	18.7	18.8	19.7	18.6	20	19	19.3	19.5	19.5	20.1	19.9	19	18.6	19.1	18.9	19.4	19.3	19.5	18.6	19.2	19.6	19.4	19.2	19.1	19.9	19.8	19.4	19.3	19.6	19.4	19.4	19.6	18.5	19	18.6	18.5	18.6
Qipengyuania vulgaris DSM 17792	26.6	18.1	19.4	18.8	19.5	20.7	19.7	20.9	19.4	18.4	18.5	19.3	19	21.6	19.6	19.2	19.2	25	18.8	19.2	20.7	18.8	19.8	18.8	18.4	19	19.8	31.1	19.4	19.3	18.7	19.4	21.8	19.8	21.2	19.1	22.1	24.8	18.6	19.4	19.7	20.2	18.7	19.8	18.3	19	18.3	19	18.3
Qipengyuania xiapuensis 1NDW9	19.1	18.7	19.4	18.9	19.5	18.5	17.6	20	18.9	18.4	19	18.9	19	18.5	19.5	18.8	20.4	19	18.6	18.8	19.8	18.2	20	19.4	18.4	18.9	19.3	19.1	19.2	19.5	18.7	19.6	18.9	19.5	18.9	19	19.9	19.1	19.1	18.7	20.2	19.3	18.9	19.4	18.6	17.7	17.8	17.9	17.9
Rhizorhabdus argentea DSM 100912	18.6	19.8	19.7	19	19	18.5	19.8	18.7	19.1	18.8	19.4	18.3	18.7	18.1	18.9	18.7	21	18.9	19.1	19.6	19.1	18.9	18.7	20.3	19.3	19.2	18.5	19.7	18.6	18.9	19.7	18.5	18.3	19.3	19.6	19.8	20	19.5	19.3	19.4	18.8	19.5	19.3	19.6	20	18.7	18.9	19.5	19.1
Rhizorhabdus dicambivorans Ndbn-20	18.5	20	20.5	19.3	18.7	18.6	20.2	19.5	19.5	19.1	18.6	19.1	19.1	18.9	18.7	18.7	20.9	21.4	19.6	19.3	18.9	19.1	18.9	19.7	19.8	19.2	18.4	19.1	18.1	19	18.6	18.7	19.1	19.3	18.8	19.5	19.9	19.4	19.5	19.5	19.3	20	19.9	26.7	21.9	19.1	19	19.3	19.1
Rhizorhabdus histidinilytica UM2	18.6	19.9	20	19.2	18.5	19.4	22.2	19.9	19.5	20.6	18.9	18.4	20.1	18.4	18.6	19.2	21.2	18.4	18.7	19.3	18.9	19.1	19	19.5	18.9	18.8	19.2	19.5	18.7	18.9	18.7	19.1	18.4	18.7	18.9	19.5	20.1	18.7	19.6	19.5	18.9	19.7	19.8	19	20.2	19	18.6	19.2	19.1
Rhizorhabdus phycosphaerae MK52	18.9	19.8	19.8	19.8	19	19	20.1	19.5	19.6	18.9	18.7	18.6	19	18.7	18.5	19	20.2	18.4	19.6	19.5	18.5	18.8	18.7	19.9	19.6	19.5	18.4	19.2	18.7	19.2	19	19.1	18.5	18.8	19.1	19.5	19.4	18.8	19.5	19	18.5	19.8	19.6	19.5	19.6	19.5	18.6	18.9	19
Rhizorhabdus wittichii RW1	18.7	20	20	19.6	19.1	19.3	19.8	19.8	18.9	20.1	19.5	19.9	20.6	19.5	18.8	19.5	22.9	22.7	18.9	19.5	19	19.3	19.1	20.2	19.4	19.3	19.2	20	18.9	19	18.9	19.4	19.1	19.4	19.2	20.2	20.6	19	19.7	19.4	18.9	19.8	19.8	20.9	20.5	19.2	18.9	19.3	19.3
Rhizorhapis suberifaciens DSM 7465	20.3	20.4	19.9	20.9	19.6	21.1	19.3	20.5	19.3	22	19.3	19.8	18.9	20	19.9	20.6	21.9	21.1	19.1	19.2	20.2	19.8	20.5	19.8	19.6	18.7	19	19.5	20.1	19.6	19.3	19.4	18.8	19.6	19.8	20.4	21.1	20.9	20.3	19.5	20	19.9	19.4	19.7	19.3	18.5	19.1	19.7	19.2
Sandaracinobacteroides hominis SZY PN-1	18.4	18.9	19.4	18.8	18.3	18.8	20	19.1	18.9	20.4	20.8	19.5	18.2	19.1	19.4	18.6	20.9	19.3	18.3	18.6	17.9	19.3	17.5	19.3	19	18.1	18.1	21.2	18.9	18.6	19.4	18.4	18.1	18.1	18.4	18.2	19.2	18.4	18.7	19	18.2	20.7	19.1	19.2	19.8	18.3	18.6	18.4	18.6
Sandaracinobacteroides saxicola M6	18	18.7	18.7	17.8	18.3	17.9	17.9	18.3	18.6	19.8	19.8	18.1	20.4	18.3	17.7	19.1	24.9	18.6	17.7	18.8	18.2	18.9	17.7	17.8	17.9	17.5	18.2	18.3	18.1	17.6	18.2	17.1	18	18.4	18	18.7	18.8	17.7	17.9	18.7	17.5	17.9	18.4	19.2	17.5	17.8	17.9	18	18
Sandaracinobacteroides sayramensis RS1-74	18.9	19.3	19.4	19.4	18.3	18	18.9	18.8	19.1	19.2	18.5	18	21.4	18.1	18.1	18.7	20.9	18.1	18.9	18.7	18.3	19	18.2	18.8	18.9	18.5	17.9	19.1	18.3	18.5	18.5	17.9	18.2	18.8	17.7	18.4	18.3	18.1	18.8	18.5	17.6	18.5	18.9	18.7	18.8	18.2	18.3	18.8	18.4
Sandarakinorhabdus cyanobacteriorum TH057	19	18.6	19.5	18.6	18.2	18.5	18.4	18.6	18.7	18.7	17.6	17.6	19.3	18.6	18	18.8	20.4	18.6	18.4	18.5	18.6	35.7	18	19.7	18	19.2	17.8	19.3	17.7	17.7	18.3	18	17.6	18.6	18.9	18.5	18.9	18.5	18.5	20.8	18.4	19.5	18.4	18.4	18.5	19.3	18.6	19.2	19
Sandarakinorhabdus limnophila DSM 17366	19.4	19.1	18.9	19.1	18.3	18.2	18	18.1	18	19.4	17.4	18.1	18.6	17.6	17.6	18.2	20.4	17.4	17.8	18.1	17.8	19.6	17.6	20.1	19.1	18.3	17.8	19.3	18.1	18	18.2	17.6	17.6	17.6	19.2	17.5	18.6	18	17.7	17.6	18	18.2	17.7	19.3	18.3	18.7	18.3	18.5	18.5
Sandarakinorhabdus oryzae NM-18	19.5	18.6	19	18.1	18.5	18.1	18.2	17.9	18.5	17.3	17.6	18.2	18.3	18	18.2	19	20.1	18.5	18.1	18	18.3	19.3	18.1	18.6	18.4	18.5	18.4	19.1	17.9	18.1	17.7	17.7	18.6	18.4	18.1	17.9	18.7	18.4	18	18.3	18.5	18	18.1	19.5	18.4	19.2	18.7	18.6	19
Sandarakinorhabdus rubra MO-4	18.8	18.9	18.8	18.7	18.1	18.2	18.1	19	18.6	19.1	18.3	18.4	19.3	17.9	18.5	19.1	21.5	17.7	19.5	18.1	18.2	19.9	17.9	18.8	18.8	18.3	18.2	19.8	18.1	18.4	18.3	17.9	18.5	18.6	19.2	18.2	18.9	18.5	18.3	17.8	18.1	18.6	18.8	19.5	18.8	19.3	19.6	19	19.1
Sphingoaurantiacus capsulatus KCTC 42644	18	19	19.4	19.7	18.8	18	19.1	18.1	18.7	19.3	17.9	17.8	18.9	18.2	18.3	20	22	19.5	18.3	18	18.6	18	18.3	19.7	18.4	18.7	18.4	18.6	18.5	18.7	18.2	17.8	18.9	18.1	19.4	18.4	19.1	18.5	19.3	18.9	18.5	19.1	18.9	18.8	18.7	19.3	18.8	19.1	19.1
Sphingobium abikonense NBRC 16140	19.3	19	19.4	18.9	18.8	19.1	19.6	18.8	19.4	18.6	20.2	18.5	18.5	18.9	19.9	18.1	20	20.1	19.3	19.1	19.2	17.9	18.8	20.9	18.6	19.1	18.6	19	18.5	18.8	19	19.2	18.1	18.8	19.6	19.3	19.7	18.7	19.8	19.6	19.6	19.5	19.8	20.7	19.5	18.4	18.2	18.6	18.3
Sphingobium algorifonticola TLA-22	19	19.2	19.8	19.3	18.8	20	19.1	19.1	21.2	20	18.3	19.2	19.4	18.8	18.8	19.6	23.5	19.1	18.8	18.4	19	17.9	19.2	20.4	19	19.9	18.4	19.4	18.8	18.7	18.7	17.9	18.2	18.9	18.6	19.3	23.1	17.8	19.5	19.1	19.1	19.6	19.3	19.2	18.8	18.4	17.9	18	18.5
Sphingobium amiense DSM 16289	19.2	19.1	19.7	19.1	19.4	19.9	18.6	19.1	21.4	20.1	19.9	19.4	19.5	18.7	19.3	19.4	20.7	23.1	18.9	19.8	19	18.3	19	19.9	19.1	18.5	18.5	19.9	18.8	18.8	19.6	18.7	17.9	19.3	19	18.7	21.5	19.6	20	20.4	18.5	19.9	20.1	32.3	19.9	18.5	18.3	18.2	19
Sphingobium aquiterrae DSM 106441	18.6	19.6	19.3	19	18.8	18.7	19.7	19.6	19.3	19.9	20.4	18.5	19.8	18.4	19.2	18.7	19.8	19	18.8	19.2	19.1	18.3	18.4	20	19.1	19.4	18.2	19.6	18.9	18.8	18.9	19	18.8	19.2	19.2	18.9	19.6	19	19.1	19.8	19.2	19.5	19.5	20	19.6	18.5	18.7	18.6	18.7
Sphingobium aromaticiconvertens DSM12677complete	19.5	20.2	19.8	20.3	18.9	19.5	20.8	18.9	19.2	19.7	21.2	19.2	19.2	18.5	19.1	19.1	20.1	21.6	19.2	19.5	19.3	19.3	18.7	20.8	19.2	19.8	18.6	22.5	18.4	19.4	19.2	19	18.6	19.5	18.5	18.7	20.6	19.5	19.7	19.9	19.3	21.7	20.3	19.5	18.8	18.7	18.5	18.4	19.4
Sphingobium baderi LL03	19.5	19.8	19.6	20.1	20	19.7	20.9	20.1	19.8	21.3	21.1	20	19.5	21.1	19.2	19.9	21.7	25.4	19.4	20.1	19.1	19.3	19.7	20.8	20	19.4	18.7	20.1	19.5	18.7	20.7	19	19.4	19.8	19.1	19.7	21.2	19.7	19.5	20.2	19.4	20.9	20.6	36.5	19.7	19.1	18.8	19.4	19.3
Sphingobium bisphenolivorans YL23	18.6	19.2	19.5	18.8	18.8	18.8	19.8	19.4	20.1	18.8	19	18.8	19	18.8	18.6	19	20.3	21.8	18.9	18.9	18.6	19	19.1	20.9	19	19.1	18.7	18.5	18.6	18.8	19.5	18.9	18.5	18.6	18.9	18.9	33.6	19	19.3	19.4	18.7	19.7	19.8	20	20.1	18.7	18.1	18.7	18.3
Sphingobium boeckii DSM 25079	18.5	18.7	18.8	18.8	18.4	18.7	18.5	18.9	19	19.5	19.7	18.8	18.2	18.6	18.9	18.7	20.7	19.2	18.2	18.4	18.8	18.5	18.8	19.3	19.6	18.4	18.3	19.9	18.6	18.6	18.3	19.2	18.2	18.7	18.6	18.6	18.9	19	19.2	19.1	18.3	19.5	19.2	18.9	19.1	19.3	18.5	18.8	18.3
Sphingobium chlorophenolicum NBRC 16172	19.4	19.6	19.6	19.4	18.7	19.3	21.3	19.5	19.3	19.1	18.9	18.9	19.2	18.9	19	18.9	20.2	21	18.5	19.2	18.7	19.6	19	20.4	19.5	19	18.6	19.5	18.6	18.6	18.9	18.8	18.3	18.7	18.6	18.7	19.2	19.6	19.7	19.8	19.3	20.3	20.1	31	19.9	18.2	18.5	18.3	18.7
Sphingobium chungbukense DJ77	17.9	19.2	20	19.4	18.7	19.1	20.3	19.5	20.2	19.2	18.8	19.3	19	19.5	18.8	18.8	21.5	20.7	18.9	19.2	19.2	18.3	19.3	20.6	19.2	18.7	18.5	19	18.4	19.1	18	18.5	18.7	18.8	18.6	19.2	20.3	18.6	20.2	19.2	19.3	20.9	20.1	19.4	20.3	18.5	18.5	18.3	18.3
Sphingobium cloacae JCM 10874	18.6	19.6	19.1	19.3	18.9	18.8	20.1	19	18.8	19.3	19.7	19.5	18.8	19	18.8	19.3	19.5	22	18.4	20	19.3	18.9	19	20.6	19.7	19.1	18.4	19.5	19	19	19	18.6	18.6	19	19	18.7	20.8	20	19.3	19.4	18.7	19.9	19.8	29	20.2	18.4	18	18.2	18.8
Sphingobium cupriresistens CCTCC AB 2011146	18.6	19	19.1	18.2	18.7	18.9	18.8	19.5	19.3	19	19.8	19.1	20.2	19.1	18.8	18.2	20.3	21.9	18.5	19	18.8	19	18.8	20.7	19	18.9	18.6	18.6	18.4	18.5	19.2	18.4	17.9	18.9	18.8	18.5	20.4	19.5	20.1	20.2	19.8	20.2	20	21	19.3	17.9	17.7	17.8	18.2
Sphingobium estronivorans AXB	19.2	19.4	19.5	19.7	19.1	19.1	19.5	19.1	19.6	20	18.8	19.2	19.5	19	18.6	19.2	19.6	19.6	18.8	18.6	19.4	19.1	19.2	19.9	19.5	18.8	18.8	20.3	18.1	18.9	19.2	19	18.3	18.8	18.8	18.9	20	19.5	19.3	19.5	18.9	20	20.1	19.1	19.9	18.4	18.2	18.4	18.2
Sphingobium faniae CGMCC 1.7749	18.6	19.1	19.2	18.7	18.6	18.8	19.6	19.1	19.5	19.5	18.7	19.7	20	19.5	18.6	19.7	21.2	21	18.9	19.2	19.1	20.1	19.7	20.6	19.1	19.1	18.1	19.2	18.7	19	18.9	18.8	18.9	19.1	19.6	18.9	19.7	19.4	19.7	19.8	18.6	19.8	20	19.9	20.2	18.6	18	18.1	18.8
Sphingobium fluviale CHR27	18.7	19.7	19.8	18.8	19.2	18.8	17.9	19.6	20.7	19.7	19	19	19.6	20	19.5	19.4	23	18.7	19.2	19	18.8	19.7	19.2	19.2	18.6	19	18.3	19.7	19.3	19.1	20.4	19.2	18.7	18.6	19.5	19.5	19.8	19.2	19.4	19.3	19.6	20.3	20	20.6	19.4	18.2	18.6	18.5	18.2
Sphingobium fontiphilum DSM 29348	19.4	19.4	19.5	19.9	19.8	19	19.8	19.9	20.1	20.3	19.9	18.8	19	19.4	19.3	19.8	20.5	20	18.9	19.8	19.8	20.1	19.4	20.7	19.8	19.4	18.4	20.4	18.2	18.8	19.7	18.9	18.4	19.9	18.6	19.8	19.9	19.6	19.6	20	18.7	20.6	19.8	20.1	19.7	18.6	17.9	19.1	18.6
Sphingobium fuliginis DSM 18781	18.7	19.2	19.9	19.3	19	19.1	21.6	19.9	19.8	19.6	18.6	18.9	19.5	18.8	19	18.3	19.4	18.1	18.7	18.3	19.2	20	18.9	21.2	19.2	18.9	18.8	19.4	19.4	19.1	18.9	19.2	18.8	19.3	18.7	19.4	20.1	19	19.7	19.8	19.5	20	19.9	20.3	20.2	18.7	18.6	18	18.9
Sphingobium herbicidovorans MH	18.7	19.1	19.6	19	19.1	19.3	20.2	19.9	19.5	19.8	19.2	18.9	20.5	18.7	19.1	19.2	20.6	20.9	18.7	19.7	19.4	20.1	19	20.9	19.4	19.5	18.8	19.6	18.8	18.8	19.1	18.9	18.8	19.3	18.6	19	21	19.8	19.9	19.9	19.6	21	19.8	19.9	19.6	19.2	18.8	18.9	18.9
Sphingobium indicum B90A	19.2	19.6	19.5	19.2	19.2	20.4	19.6	20	21.9	19.3	20.1	18.9	20.7	19.1	18.9	19	21.4	24.7	18.4	19.7	19.3	20.1	19	20.4	19.6	19	19.2	19.5	18.9	19.3	19.8	19.6	18.6	19.3	18.7	19.1	20.8	19.3	20	19.6	19.2	20.1	20	19.7	20.4	18.7	18.4	18.8	18.7
Sphingobium jiangsuense NBRC 112973	18.8	19.2	19.3	19.7	19.3	19	19.7	19.3	19.7	19.9	18.5	19	20.2	19.7	19.1	19.5	19.9	22.2	18.7	19.5	19	19.5	19.5	20.3	19.4	19	18.6	19.7	18.7	19.2	19.2	19	19	19.2	19.6	19	21.1	19.4	19.9	20	19	19.9	20	25.2	19.5	18.7	18.4	18.5	18.8
Sphingobium lactosutens DS20	20.1	19.9	20.7	19.8	19.3	19.8	20.9	19.6	19.6	21.4	22	20.1	20.5	19.5	20.6	19.8	23.1	30.5	19.9	20.5	20	20.4	19.1	22.1	20	19.8	19.1	20.9	20	19.2	20.3	20.2	19.1	20.5	20.8	20.4	22.3	19.8	20	20.1	19.9	20.6	20.4	20.6	20.5	19.1	19	18.7	19.5
Sphingobium lignivorans B1D3A	19.4	19.4	19.9	19.2	19.2	19.4	21	19.2	20.1	19.6	19.3	18.7	19.9	18.8	19.5	18.9	22	18.1	19.9	19.4	19.7	20	19.4	19.9	19.3	19.5	18.8	20.4	19.9	19.2	20.6	18.5	18.7	19.6	18.8	19.2	19.6	18.8	20.1	19.5	19.6	20.5	19.9	21.2	19.6	18.7	18.8	18.7	19
Sphingobium limneticum DSM 25076	18.5	19.1	19.9	19.4	18.8	19.8	19	19.9	19.6	19.4	18.9	19	20.2	19.1	19.1	18.8	20.3	20	18.7	19.3	19.8	19.6	19.1	21	19.2	19.1	17.9	20.5	18.7	18.7	19.2	19.4	18.3	18.6	19.2	18.7	19.6	19.8	20.1	20.3	19.5	20.6	20	20.1	20	18.4	17.9	18.4	18.2
Sphingobium mellinum DSM 7458	18.4	19.4	19.8	19.5	19.2	19.2	19.7	19.2	20.2	19.5	18.8	18.6	18.9	18.8	18.8	19.9	22.2	19.2	18.3	18.9	19.5	18.9	18.9	22.1	19.5	18.6	19.4	19	19	18.7	19.3	18.9	18.4	19.4	19.3	19	19.7	18.4	20.5	20.6	19.5	19.7	19.2	21.5	19.6	18.7	18	17.8	19.5
Sphingobium naphthae FXH-27	20.6	19.4	19.6	19.2	18.8	18.9	19.1	20.6	19.5	19.5	18.9	19	19.5	20	18.8	19.1	21.2	26.6	18.8	18.8	19.7	19.8	18.9	20.3	18.9	18.7	19.1	21.2	18.5	19.3	19	18.6	19.9	18.9	19.6	19	20	19	19.4	19.7	19.1	20.1	19.8	19.8	19.6	18.4	18.3	18.7	18.3
Sphingobium olei DSM 18999 contigs	18.7	19.2	20	19.4	19.1	19.4	19.2	19.2	19.7	18.6	19.5	19	19.6	19	19	18.9	20	21.6	18.8	19.4	19	20.1	18.8	21.1	19.3	19	18.1	19.4	18.8	19.3	19.4	18.8	17.8	19.2	18.7	18.9	20.4	19.2	19.7	19.5	19.2	20.7	20.1	19.8	19.3	18.7	18.3	18.8	19.3
Sphingobium phenoxybenzoativorans SC_3	19.1	19.7	20.1	19.4	18.7	19.4	20.9	19.4	19.6	20.1	19.4	19.2	18.6	19.5	19.2	18.6	20.5	23.1	19.2	19.6	19.3	19.7	18.9	20.8	19.7	19.2	18.8	19.1	18.7	19.2	19.3	19.3	19	19.5	19	19.8	19.7	19.3	20.2	20.3	19.5	20.9	19.7	36	19.9	18.8	19.2	19.1	18.8
Sphingobium psychrophilum AR-3-1	18.6	18.9	19.2	19.3	18.8	18.8	19.1	18.8	19.4	19	19.8	19	18.8	19.1	18.8	19.1	20.6	20.6	20.1	20	18.7	19.2	18.5	19.8	19.6	19	18.9	18.6	18.8	18.6	19.7	18.5	18.6	19.1	18.9	19.4	19.4	19.3	20.2	19.7	19.4	19.8	19.7	19.5	19	17.9	17.9	19	18.6
Sphingobium quisquiliarum P25	19.2	19.9	19.7	20.2	19.1	19.6	20.5	19.6	19.7	20.1	19.3	20.7	19.3	19.4	19.8	19	21.3	23.3	18.9	20.7	19	19.6	18.9	21.3	19.7	19.6	18.9	20.2	19.5	18.7	19.4	19.2	18.7	19.8	18.8	19.1	21.2	19.9	19.9	20.1	19.9	19.2	19.4	19.8	19.6	19.2	18.3	19	19.5
Sphingobium rhizovicinum CCM 7491	18.7	20.3	21.1	19.6	19.5	19.5	19.1	19.8	20	18.2	19.5	19.9	19.1	20.1	19.3	18.7	19.5	22.1	18.4	19.1	19.1	20.3	19.6	20.4	20.5	19.3	18.6	18.9	19.2	19.2	19.1	19.7	18.5	19.3	19	19.9	20	19.7	20.9	20	19.3	20.5	21	20.4	21.3	18.9	18.5	19.2	18.5
Sphingobium scionense ICMP 13533	18.6	19.3	19.6	19.6	19.1	19.1	19.4	19.3	19.7	18.6	18.5	18.7	19.1	18.9	19.2	18.5	20.5	19.1	18.4	19.9	19.1	19.9	18.9	19.5	19.2	18.5	18.3	22.3	19.1	18.7	18.8	18.9	18.6	19	18.6	18.9	23.1	19.2	19.5	20.2	19.2	20	19.5	21	19.9	18.3	18.2	19	18.6
Sphingobium subterraneum DSM 102255	18.9	19.6	20	20.7	18.9	19.1	19.2	18.9	20.1	19.7	18.3	18.2	21.1	18.9	20.1	18.9	20	28.9	18.5	18.9	19.2	19.8	18.8	20	19.7	19.1	18.7	19.8	19.2	18.8	18.9	19	20.1	19	18.5	19.2	19.5	20	19.7	19.2	18.5	19.6	19.4	19.7	20.7	18.3	18.5	18.4	18.7
Sphingobium sufflavum HL-25	18.3	19.2	19.5	18.9	18.8	18.6	19.7	19.4	19.4	19.9	19.3	18.7	19.6	18.5	18.5	18.9	19.5	18.3	18.4	18.9	19	19.9	19.5	20.1	18.8	19.2	18.3	18.5	18.7	18.9	19.5	18.6	18.5	18.1	18.6	19.1	19.4	18.6	19.1	19.1	18.8	19.7	19.9	19	20.2	18.6	18	18.8	18.6
Sphingobium terrigena EO9	18.6	19.4	19.3	19.1	18.7	18.6	19.2	18.9	19.3	18.9	18.2	18.4	18.3	18.6	18.8	18.2	19.4	19.3	18.4	18.9	19	19	18.7	20.1	19.4	19	19.2	19.1	18.9	18.8	18.5	19.2	18.6	18.8	18.5	18.8	19.4	18.9	19.9	20	19.2	19.3	19.5	18.8	19.1	18.3	18.2	18	18.5
Sphingobium ummariense RL-3	19.5	19.9	20.2	19.7	19.3	19.2	20.9	19.4	19.5	20.7	19.8	19.4	20.3	20.1	19.3	18.7	21.3	26.5	19.8	19.4	19	19.5	19.4	21.5	19.7	19.7	19.1	23.1	18.9	19.2	20.5	19.2	18.7	20.2	19.3	19.7	20.8	20.7	19.9	19.4	19.2	20.6	19.8	21.7	19.9	19	18.7	18.8	18.8
Sphingobium vermicomposti DSM 21299	19.2	19.2	19.8	20.3	19.4	20.1	18.5	20	20.2	19.3	19.6	18.8	19.4	19.6	19.2	19.2	20.1	20.2	18.6	19.2	20	19.8	19.5	19.8	19.9	20	19.2	19.5	19	19	18.6	19.4	19.2	19.2	20.2	19.2	20.5	19	20	19.8	19.8	20.4	20.2	19.7	20.1	18.7	18.6	19	18.5
Sphingobium wenxiniae CGMCC 1.7748	18.7	19.5	19.5	19.5	19.7	19.4	19.7	19.5	19.4	19.6	19.6	20.3	18.8	19.7	18.6	19.2	21	21.8	19	19.4	18.8	20.1	19.1	20.1	19.3	19	18.5	22	19.1	18.3	19.5	18.8	18.7	19.1	18.8	19.3	20.3	19.4	19.2	20.2	19	19.9	20.3	20.9	20.7	18.5	18.6	18.4	19.2
Sphingobium xanthum NL9	19	19.6	19.6	19.3	19.3	18.8	18.7	19.3	19.3	19.4	19.7	18.4	19.3	18.7	18.8	18.8	20.7	18.8	19.4	19.1	19.4	20.1	19.7	19.2	19.1	19.3	19.7	19	19	19.2	18.5	19.2	19.2	19.1	19.9	18.8	19.6	19.6	19.2	19.6	19.3	19.5	19.7	19.2	19.4	18.5	18.7	19.3	19
Sphingobium xenophagum NBRC 107872	18.7	19.3	19.3	19.5	19.1	18.2	20	19.6	19.9	18.7	18.7	18.8	19.1	19.2	19.3	18.4	19.2	19.8	18.9	18.6	19.1	19.8	19.3	20.1	19.9	20.1	18.3	19.3	18.6	18.9	18.6	19.2	18.6	19.3	18.2	18.6	19.5	18.6	19.7	20	18.8	20	19.3	19.2	22.7	18.2	18.1	17.8	18.7
Sphingobium yanoikuyae ATCC 51230	19	19.5	20.2	19.7	19.6	19.3	20.7	20	20.1	20.2	19.8	18.8	20.1	19.2	19.2	19.3	20.4	20.6	18.7	19.7	19.3	19.8	19.2	20.3	20.1	18.9	18.6	20.7	19.6	19	20.2	19.2	18.4	19.4	19.2	19.5	19.5	19.1	20.2	19.8	19.4	20	19.8	19.7	20.5	18.5	18.8	19	18.6
Sphingomicrobium aestuariivivum KCTC 42286	19.8	18.6	18.8	19.7	19.1	19	20.5	19.3	19	19.3	19.1	17.8	19.1	19.4	19	19.6	25	19.6	19.5	19	19.1	18.5	19.4	19.2	18.3	19.3	19.2	20.5	19.4	18.9	19.2	19	18.6	20.3	19.4	18.3	19	19.1	18.9	18.7	19.1	19	18.9	21	18.8	17.6	18.3	18.4	18.1
Sphingomicrobium arenosum NBRC113094	19.8	18.7	18.5	19.5	19.1	18.6	18.9	19.8	19.2	20.6	19.3	18.5	19.3	18.5	19.1	22.9	23.9	19.8	19.9	19.1	19.3	19.2	19.4	19	19.3	19.7	18.8	20.3	18.6	19	18.6	18.8	20.5	19.7	19	19	19.2	18.8	18.7	18.6	19.2	18.9	18.5	19.7	18.3	18	17.8	18.2	17.9
Sphingomicrobium astaxanthinifaciens JCM 18551	19.3	18.9	19.3	19.7	19	18.6	20.7	18.9	19.4	18.6	20.1	18.2	20.4	18.7	19.3	21	24.2	21.4	19.3	20.1	19.5	18.8	19.3	21	19.8	19.4	18.9	20.1	18.9	19.1	19.8	19.1	19.2	19.7	19.2	19.3	19.4	19.8	18.6	19.3	19.1	18.8	19.4	21.5	18.6	18.1	18	18.2	18.2
Sphingomicrobium flavum JCM18555	18.8	18.5	18.8	19.4	18.9	19	18.9	19.7	19.3	20.9	19.2	18.5	19.3	19.3	19.6	19.4	22.2	21.3	18.9	18.5	19.3	19.5	19.2	19.3	18.9	18.6	18.7	18.9	18.7	19.6	18.5	19.4	18.8	19.4	20	19.7	20	20.2	19.3	19.3	19	18.8	18.9	19.5	18.7	17.6	18.5	18.3	18.3
Sphingomicrobium lutaoense DSM 24194	19.9	18.6	18.8	20.3	18.8	18.8	19.8	19.1	18.6	18.5	20.2	19.1	20.1	18.9	19.2	19.2	22.2	19.7	19.2	19.5	19.5	18.9	19	19.3	18.8	19.5	18.6	20	19.7	18.9	20.6	19.1	19.3	19.7	19.6	19.2	19.7	19.1	19.5	19.4	18.8	19.4	18.9	19.5	18.5	18.6	18	17.8	17.9
Sphingomicrobium marinum JCM18554	20	18.4	18.8	19.5	20	18.8	20.4	19.4	18.9	19.9	21.3	18.5	19.4	19.2	18.9	19	22.5	19.1	19.3	19.5	18.4	19.4	20.8	18.3	18.4	19.4	18.8	20.8	18.6	18.8	19.4	19.3	18.4	19.8	19.2	19.5	20.2	19.2	18.6	18.7	19	19.1	19.2	20.1	18.3	17.6	17.8	18.3	17.6
Sphingomonas abaci DSM 15867	17.8	19.6	19.5	19	18.6	18.6	19.9	18.7	19.3	18.4	18.1	18.3	18.9	18.4	18.7	18.4	21.2	17.8	19	18.6	18.6	18.3	18.6	19.8	20.1	19.1	18.5	19.7	18.8	18.8	18.8	18.5	18.1	18.7	19.1	19.2	19.4	18.6	19.6	19.3	18.7	20.2	19.5	19.4	19.7	18.8	18.9	19.1	18.9
Sphingomonas adhaesiva DSM 7418	18.9	19.4	20	19.1	19	18.8	18.3	18.9	19.1	19.1	18.9	18.3	19.4	18.5	18.9	18.5	20.5	19.1	19.9	18.5	19.2	17.3	18.8	19.8	19	19	18.9	17.9	19.1	18.6	18.6	19.2	18.3	19	18.5	18.8	18.9	19.8	19.2	19.3	19	19.5	19.9	19.7	19.3	18.6	18.8	19	19.1
Sphingomonas aerolata NW12	18.8	19.5	18.8	20	18.6	18.6	20.1	18.8	18.4	19.1	18.4	18.6	19	18.5	19	18.4	21.6	19.8	18.2	18.4	18.6	18.9	18.7	19.7	19.6	19	18.6	19.2	18.1	18.6	18.4	18.6	18.7	18.7	18.7	18.9	19	18.4	19.2	19.3	18.5	19.4	19.1	18.6	19.2	18.8	18.8	19.1	18.7
Sphingomonas aerophila DSM 100044	18.4	19.5	19	19	19.3	19.2	19.6	19.5	19.2	17.8	18.8	18.4	19.2	19	18.5	19.2	21.9	20.2	18.1	18.9	19.1	18.3	18.3	20	18.8	18.7	19.4	19	19.2	18.4	18.6	18.6	18.6	19.7	19.3	18.9	19.2	18.6	19.4	19	18.9	19	19.1	19.6	18.2	19.6	19	18.4	18.7
Sphingomonas aestuarii DSM 19475	18.5	18.9	19.6	18.8	18.8	19.3	19.9	19.3	19.5	18.3	18.6	18.8	18.4	20	19	19.3	22.4	18.5	18.4	19	18.7	18.8	18.7	20	19.9	18.9	19.8	19	19.7	19.3	18.4	18.8	18.4	19.2	19.7	19.9	19.8	18.6	19.4	19.4	18.6	19.8	19.5	19.9	19.2	18.6	18.8	18.5	18.5
Sphingomonas agri LMG 29563	19.9	18.8	18.9	20.5	19.2	20.5	23.8	18.1	20.1	22.4	20.1	19.2	21.7	19.9	19.7	22.6	25.6	20.9	20.7	19.8	19.5	18.3	19.6	21.6	21.1	19.7	20.3	24.6	19	19.7	19.2	19.2	20	19	20.2	19.6	20.5	20.7	19.6	19.3	19.1	19.3	19	20.9	18.7	19	17.9	19.1	18.7
Sphingomonas albertensis DOAB 1063	19.3	19.6	19.5	19.1	18.7	18.9	19.7	18.9	19.3	19.5	19	18.3	19.3	18.4	18.6	18.6	22.4	18.8	19.3	19	18.6	18.3	18.5	20.6	20.7	19.2	18.5	19.1	18.5	18.6	18.6	18.5	18.5	19.3	18.9	18.9	19.1	19.2	19.7	18.8	18.9	19.5	19.1	19.7	19	18.5	18.9	18.8	18.7
Sphingomonas aliaeris DH-S5	18.9	19.1	19.8	19.4	19.2	18.3	19.1	19.1	19.8	19.8	18.8	19.1	19	18.6	19.2	18.6	22.4	19.4	19.2	18.1	18.5	19.2	18.6	21.1	19.8	19.2	18.5	18.7	19.2	18.8	18.8	18.7	19.1	19	18.2	18.8	18.9	19	19.5	20.3	19.5	19.9	20	19.6	19	18.9	18.9	19	19
Sphingomonas alpina DSM 22537	19.2	19.3	19.2	19.9	18.5	18.5	19.6	18.7	19	19.6	18.8	18.2	18.8	17.9	18.9	18.3	19.6	19.3	19.3	18.3	18.5	19.4	19.1	19.8	19.1	18.2	18.2	18.9	18.4	18.6	17.9	18.6	18.2	18.7	18	18.5	18.7	19	19.2	18.9	18.8	19.2	19.3	19.1	19.4	18.6	19	18.6	18.4
Sphingomonas aquatica LMG 28596	19.1	19.3	19.3	19	18.9	20.3	18.6	18.8	19.8	19.7	19.1	18.6	18.9	19.2	19.2	18.1	20.9	21.3	18.8	18.9	19.1	18.7	18.9	19.1	18.7	19.4	18.4	19.3	19	19.5	18.7	19	18.2	18.6	18.6	19	19.5	19.3	19.7	19.8	19.2	21.5	19.3	19.4	19.2	18.7	18.3	18.4	18.3
Sphingomonas aquatilis NBRC 16722	18.4	19.5	20.2	19.4	18.9	19.1	19.8	19.4	19.2	18.8	19.2	18.1	18.3	18.5	19.2	18.8	21.2	18.5	19.2	18.2	19.4	19	18.7	20.1	19.3	19.2	18.9	19.5	18.7	19.1	18.1	19	18.7	19.5	19	19.3	19.2	19.1	19.5	19.4	19.4	19.5	19.9	19.4	19.6	18.7	19	19	18.7
Sphingomonas aracearum WZY 27	18.4	19.3	19.5	19.5	19.4	19.4	18.9	19.1	19.9	18.8	18.8	19.4	19.1	18.5	19.2	17.8	20.8	18.5	18.6	18.6	18.9	19.3	19.3	19	19.2	19	19.2	19.2	18.7	18.6	18.6	18.9	18.8	18.8	18.9	18.8	19.3	19	19.1	19.3	18.8	19.6	19.7	20	18.9	18.8	18.8	19.1	18.5
Sphingomonas arantia CGMCC 1.12702	18.4	19.2	19.4	19.8	18.6	18.3	18.7	19.1	18.8	19.4	19.1	18.7	18.9	18.9	18	19.8	20.3	19.8	18.5	18.5	19.1	18.9	18.4	20	19.3	19.1	18.6	19.4	19	18.6	18.2	18	18.6	18.7	18.3	18.9	19.1	18.6	18.8	18.9	19.2	19	19.2	20.4	19.8	18.8	19.4	18.9	19.3
Sphingomonas arenae SYSUD00720	19.6	19.9	19.7	19.3	18.6	18.8	19.4	19.5	19.4	22.2	18.6	19.5	21.4	19.3	19.4	21	22	19.9	19.6	18.9	19.5	18.8	19.2	19.6	19.8	19.5	18.5	21.5	19.8	18.8	22	18.7	18.6	20.3	19.3	19	20	19.7	19.7	19	18.8	19.4	20.1	20	20	18.7	19.1	18.7	18.5
Sphingomonas asaccharolytica NBRC 15499	18.7	19.5	19.7	19.8	19	19.3	18.7	19.7	19.6	19	19	18.6	18.6	19.2	20.1	20.1	21.1	19.3	18.4	19.9	19.5	18.9	18.8	20.7	19.1	18.6	18.7	19.1	19.1	19.3	19	18.7	18.5	19.6	18.7	19.3	19.8	19.7	19.3	19.1	19.8	19.5	19.3	19.7	19.6	18.8	19	19	19.2
Sphingomonas astaxanthinifaciens DSM 22298	19.5	19.4	19.8	19	18.8	18.2	20	19.5	19.4	18.9	18.9	18.9	18.5	19.1	18.7	18.3	23.1	19.3	19.2	19.3	18.4	18.4	18.8	18.8	19.1	19.4	18.4	19.6	18.8	18.6	17.8	18.5	19.3	19.5	18.6	18.4	19.3	18.4	18.9	18.7	19.1	18.9	19.2	19.7	19.2	18.7	18.5	18.2	18.3
Sphingomonas aurantiaca MA101b	18.9	19.6	19.6	20	18.6	18.8	19	19.4	19.2	19	19.1	18.1	18.8	19	18.9	19.2	20.3	17.9	18.5	18.9	18.7	19.6	18.5	21.1	20.1	18.8	18.6	19.4	18.7	18.7	18.8	18.7	18.3	18.8	18.7	18.6	19.1	18.5	19.6	19.8	18.4	19.1	19.5	19.3	19	18.9	19	19	19.1
Sphingomonas azotifigens NBRC 15497	19	19.7	20	19.7	18.8	18.8	19.1	19.1	19.2	18.7	18.9	19	19.1	18.9	19	18.4	19.8	18.4	18.2	19.3	18.9	19.1	18.7	19	19.9	19.2	18.5	19	19.3	18.7	18.7	19.3	18	18.2	18.7	19.5	19.6	19.3	18.9	19.1	19.5	19.4	19.8	19.4	19.6	18.7	18.6	18.6	18.5
Sphingomonas baiyangensis L-1-4	18.5	19.2	19.3	19.7	18.3	18.1	18.3	19.1	19.2	21.9	19.3	18.3	19.3	18.7	18.4	19.1	23.4	18	18.3	18.9	18.3	18.4	17.8	18.6	19.8	17.9	18.4	18.4	18.1	18.1	17.8	18.3	18	18.2	18	18.7	19	17.8	18.8	18.9	19	19.3	19.1	19.4	18.3	18.6	18.7	18.4	18.8
Sphingomonas canadensis DSM 29393	18.9	19.3	19.6	18.9	18.8	18.5	18.7	19.3	19.6	19.9	19.3	18.7	20.9	18.9	18.7	19.1	23.2	19.4	18.4	18.8	18.8	19	18.9	20.1	19	18.9	18.7	19.3	19	18.8	18.1	19.1	18.6	19	19.3	19.3	19.3	19	19	19.1	19.1	19.5	19.4	19.3	19	18.2	18.5	18.8	18.7
Sphingomonas cannabina DM2-R-LB4	19.1	19.8	19.8	19.2	18.4	18.7	20.1	19.5	19.3	19.1	18.6	20	19.1	19.1	19.2	19.3	22.8	20	18.8	19.2	19.3	19	18.9	19.3	20	18.7	18.7	20.8	18.4	18.8	18.9	18.6	19	19.1	18.9	19.6	19.3	19	19.1	19.5	19.1	19.3	19.4	20.1	19.4	18.8	18.8	18.9	19.1
Sphingomonas carotinifaciens DSM 27347	19.1	19.3	20	19.4	19.5	19.1	21	19.1	19.4	20.2	19	18.4	20	18.4	19.4	19.5	21.1	18.7	18.4	19.4	18.9	18.6	18.8	21.3	20.3	18.8	18.8	19.7	19.4	18.6	19.1	18.8	18.6	19.4	19.1	19.7	19.2	19.1	19.5	19.3	19.2	19.6	19.6	19.7	19.3	19.2	19.1	19	19.2
Sphingomonas cavernae K2R01-6	19.6	19.8	19.7	20.2	18.9	19.4	20.4	19.9	19.7	20.1	20.2	19.5	19.8	19	19.3	20.2	22.3	20.2	18.6	19.7	19.7	18.9	19.1	19.7	20.3	19.5	19.4	20.1	19.5	19.5	19	19.6	19.4	19.1	19.3	19.2	19.2	19.9	19.9	19.8	19.3	19.9	19.7	20.1	19.2	18.8	18.5	19.2	18.9
Sphingomonas changbaiensis NBRC 104936	19.6	19.9	20.5	19.7	19.6	20.2	21	18.6	20	19.4	19.5	19.2	19.9	19.8	18.8	19.5	23.7	20.3	19.5	18.9	19.6	19.7	19.4	21	19.5	19.6	19.1	19.8	19.3	19.1	18.7	19.6	19.7	19.5	19.4	19.1	19.8	19.4	19.3	19.4	19.1	20.2	19.7	19.3	19.7	19.1	19	19	19
Sphingomonas chungangi CGMCC 1.13654	18.5	19.5	19.6	19.5	18.9	18.5	19.1	18.5	19.4	19.8	19.3	18.7	18.9	18.5	18.7	19.2	20.2	18.7	18.3	19	18.9	18.7	18.9	19.5	19.5	18.5	18.4	18.6	18.1	18.6	19	18.5	18.6	18.8	18.5	18.9	19.5	18.4	19.4	18.9	18.6	19.3	19.9	19	19.4	18.8	18.9	18.8	19.2
Sphingomonas citri RRHST34	18.5	19.4	19.7	19.7	18.6	18.4	19	18.6	19.1	18.3	18.1	18.6	19	18.6	19.2	18.9	24.1	20	19	18.4	19.2	18.8	19.5	19.8	20.2	18.5	18.5	18.8	18.7	19	18.9	18.4	18.9	18.8	18.8	19	19.5	18.6	19.3	18.9	19.2	19.2	19.2	19.7	19.1	19	18.6	19	19.1
Sphingomonas citricola RHCKR47	18.1	19.8	19.6	19.8	19.1	19.5	19.7	19.1	19.6	18.3	18.8	17.9	18.7	18.2	19.2	19.5	20	19.2	18.2	18.4	19.2	18.4	19.1	20.2	19.7	18.4	18.5	18.7	18.6	18.5	18.9	18.4	18.2	18.7	18.8	18.8	19.9	18.9	19.3	19.2	19.3	19.3	19.3	19.6	18.9	18.8	18.6	19.1	18.7
Sphingomonas colocasiae JCM-31229	18.4	19.6	19.7	19.1	18.9	18.7	20.2	19.4	19.2	19	19.3	18.3	19.5	18.5	19.1	18.7	19.6	18.4	18.2	18.5	19	18.7	18.6	19.5	19	18.8	18.6	18.7	19	18.9	18.4	19.4	18.6	19.2	19.2	19.3	19.5	18.8	19.6	19.6	18.7	19.5	19.9	20.1	19.5	18.7	18.8	18.6	18.8
Sphingomonas corticis 36D10-4-7	19.2	19.5	20.1	18.4	19.1	18.4	19.2	18.8	18.7	20.6	19.2	18.6	19.9	18.9	19.2	19.2	20.9	20.5	18.5	19.4	19.4	20.1	19.3	20.3	19.2	18.6	18.9	18.8	18.7	19.1	18.4	18.7	18.7	18.8	18.8	18.9	19.7	18.9	19	19.2	18.9	19.3	19.6	19	19.2	19.2	18.9	19.1	19
Sphingomonas crocodyli CCP-7	18.7	19.5	20.2	19	18.7	18.7	19	19.2	19	19.4	19.4	18.8	18.7	19.1	18.4	18.8	21	18.1	18.7	19.2	18.9	19.5	18.8	19.7	19.4	18.5	18	20.2	18.7	18.5	18.8	18.6	17.8	18.4	18.5	19.2	19.3	18.6	19.3	19.1	19	19	19.3	19	19.9	18.5	18.6	19	18.4
Sphingomonas crusticola MIMD3	18.4	19.5	19.4	19.3	18	18.5	18.5	19	18.8	18.4	18.5	18.3	19.1	19	18.4	18.8	19.6	21.5	18.7	19.1	19.2	19.2	18.5	19.8	19.4	18.9	18.1	19.4	18.7	18.6	18.9	19.3	18.3	18.7	19	18.6	19.3	18.6	19.6	18.8	18.4	19.7	19	19.5	19.1	19.2	19.3	19	18.9
Sphingomonas daechungensis KACC 18115	18.6	19.9	19.4	19.6	18.7	19.6	21.4	19.8	20	20.3	19.7	19	22	20.1	19.4	23.6	23.9	20.4	19.4	18.2	19.8	19.3	18.9	20.5	18.8	19.3	18.3	19.2	19.2	18.5	19.9	18.9	19.7	19.3	19.1	19.9	19.5	18.7	18.5	18.8	19.1	19.8	19.5	19.5	18.8	18.8	18.8	18.8	18.6
Sphingomonas deserti GL-C-18	18.7	19.6	20.2	19.5	18.5	19.2	18.8	19.5	19	19.5	19.8	18.8	18.9	19.2	19.2	19.4	20.6	18	19.2	19.1	18.7	19.1	18.7	19.6	19.5	19.1	18.8	19.9	19.1	19	19.8	19.4	19.6	18.9	19.1	19.4	19	19.3	19.5	19.1	18.4	19.3	18.9	19.8	19.3	18.8	18.9	19	18.5
Sphingomonas desiccabilis CP1D	18.3	19.6	19.7	19.9	19.5	19.1	18.7	19.5	19.4	19.6	19.1	18.4	18.8	18.9	18.7	19.9	21.4	19.9	18.4	18.6	19.2	19.7	19.2	20.7	19.6	19.3	18.6	19.7	19.2	18.8	18.5	18.5	18.1	19.2	18.6	18.8	19.3	18.9	19.6	20	19.2	19.9	19.8	20.2	19.4	19	19.2	19.1	19.2
Sphingomonas dokdonensis DSM 21029	18.6	19.3	19.4	19	19	19.1	18.7	18.5	19.3	19.2	18.3	18.5	19	18.2	18.7	18.2	20.4	18.8	18.1	19.1	19.6	19.6	19	19.7	20.1	19.2	18.6	19.1	18.6	18.8	17.6	18.8	18.6	19	19.1	19.2	20.1	19.2	19.1	19	18.5	19.6	19.2	19.1	19.3	18.7	18.7	18.6	19
Sphingomonas echinoides ATCC 14820	18.8	19.1	19.6	19.4	18.6	19	19.2	18.7	19.5	17.8	18	18.3	18.2	18.4	18.4	19.4	20.8	18.7	18.3	18.5	18.8	18.8	18.5	19.7	19.8	18.6	18.5	19.1	18.2	19	18.8	19.1	18.8	18.1	18.9	18.7	19.4	18.8	19.5	19.8	18.4	19.9	19.4	18.4	19.4	18.8	18.8	18.8	18.6
Sphingomonas edaphi DAC4	18.6	18.5	19.3	19.5	19.1	18.7	19	18.4	19.5	18.8	19.1	19.7	19.5	19.1	19.5	18.6	27.4	19.9	20.3	18.9	18	19.2	18.2	19.6	20.2	19.5	18.1	18.1	18.6	18.8	19.1	18.4	19.1	18.4	19.8	18.7	19.9	18.4	19.3	19.1	18.4	19.7	19.8	20.9	18.7	18.6	18.4	18.6	19
Sphingomonas endophytica DSM 101535	18.2	20.2	19.2	19.8	19.1	18.8	19	19.4	19.5	18.4	18.5	18.9	19.2	18.8	19.3	19.3	21.2	19.3	18.3	18.1	19.2	19.1	19.1	19.4	19.7	19.3	18.7	18.8	18.7	18.8	19.3	18.7	18.9	18.8	18.9	19.1	19.1	19.2	19.5	19.5	19.1	19.1	19.5	19.8	18.8	19	18.9	18.9	18.7
Sphingomonas faeni MA-olki	18.6	19.8	19.8	19.8	18.9	18.5	18.2	18.9	19.1	21	19.1	18.7	19.3	18.5	18.9	18.8	26.8	20.4	18.5	18.6	19.1	19.2	18.5	20.1	19.9	18.9	18.6	18.6	18.5	18.5	18.9	18.5	18.3	18.6	19.1	18.5	19.3	17.9	19.5	19.4	18.3	19.6	19.3	21	18.7	18.9	19.2	18.9	19
Sphingomonas fennica K101	18.7	19.7	19.7	18.7	18.8	18.8	18.3	19	19.3	20.9	19.3	18.3	18	18.9	19.1	18.3	19.9	20.4	18.5	18.7	18.4	18.6	18.6	19.5	19.4	19.2	18.6	19.2	18.6	18.8	18.3	19.2	18.2	18.4	18.6	19.4	19.2	19.3	19	19.1	19.4	19.2	19.9	18.5	19.8	18.8	18.5	18.9	18.4
Sphingomonas flavalba ZLT-5	19.4	19.2	19.3	18.8	18.8	19.3	19	18.5	18.9	18.3	18.3	18.9	18.6	19	18.6	18.1	20.7	18.3	18.4	19.6	19.1	19.7	18.9	19.5	19	19.4	18.5	19	19	18.7	18	18.8	18.4	18.7	18.4	18.5	19	18.7	19.5	18.4	18.4	19.2	19.5	18.8	19.5	18.4	18.1	18.5	18.6
Sphingomonas floccifaciens CGMCC 1.15797	18.6	19.2	20.1	19.4	19	20.1	20.4	19.3	20	19.2	18.5	18.7	19.2	18.8	19.3	19.4	20.7	19.2	17.8	19	19.4	19.2	18.9	20.2	19.7	19	18.7	19.4	19.5	18.8	18.7	19	18.7	19.2	19.2	19.7	19.9	19	19.7	20	19.2	20.6	20.1	20	19.8	19.2	18.9	19.3	18.9
Sphingomonas folli RHCKR7	18	19.4	20	20.2	19	19.1	19	19.5	19.1	18	18.5	18.6	18.6	18.8	19.2	19.7	23.9	18.6	18.8	19	19	18.5	19	20	20.1	19.3	18.6	19.3	19.1	19.1	18.8	18.9	19.5	18.7	19.3	19.1	19.2	18.6	19.5	19.2	19.5	19.8	19.5	19.5	19.3	19.1	18.9	19	19.5
Sphingomonas formosensis CC-Nfb-2	18.1	19.8	19.8	20	19.2	18.8	19.2	18.7	18.9	18.3	18.6	18.6	18.6	18.6	18.7	18.2	19	19.5	18.9	18.9	18.9	19.2	18.3	19.5	19.6	18.2	18.3	19.9	18.8	18.7	18.8	18.6	18.1	18.9	18.6	18.5	19.1	18.3	19.1	19.2	18.8	20	19.9	18.7	19.8	18.8	18.9	18.9	19.3
Sphingomonas gei ZFGT-11	18.3	19	19.3	19.9	18.7	19	19.3	19.1	19.5	19.1	18.2	19.1	19.2	19.4	19	19.5	20.6	19	19.4	19.4	18.6	18.7	18.1	20.6	19.8	18.8	18.7	19.1	18	18.8	18.2	18.2	18.5	18.5	19	18.8	19.1	18.4	19.3	19.2	18.8	19.1	19.1	18.6	19.6	19	18.9	18.4	18.6
Sphingomonas gellani S6-262	19.2	19.7	19.1	19.6	18.9	18.7	21.2	18.8	19.4	20.2	18.6	18.4	19.6	18.7	19.2	19.8	22.4	19.2	18.4	18.6	18.3	19.2	19.2	19.7	19.4	19.8	18.8	19.4	18.3	18.9	18.7	19	19	18.6	19.1	18.8	19.2	19.1	19.9	19.3	18.8	19.4	19.2	19.8	18.7	19.1	18.6	18.6	19.1
Sphingomonas gilva ZDH117	19.3	19.7	19.5	20.4	19.2	18.9	19.2	19.6	19.4	19	19.6	18.9	18.2	18.4	19	18.7	22.7	18.6	18.6	18.8	18.9	18.8	18.4	19.5	19.6	19.5	19.3	19.3	18.9	18.8	19.3	18.8	18.4	18.9	18.9	18.4	18.8	19.6	19.5	19.3	18.9	19.5	19.4	19	19	18.4	18.6	18.9	18.9
Sphingomonas ginkgonis HMF7854	19.2	19.5	20	18.7	18.7	18.5	19.2	18.9	19.1	22.2	19.8	18.4	20.9	18.6	18.6	20.5	30.3	19.3	19	19.3	19.3	19.3	18.9	19.3	18.6	18.5	18.5	20	18.2	19	18.1	18.7	17.9	18.6	18.8	18.7	19.6	18.7	19.2	19.1	19.1	19.1	19.3	20.7	18.4	18.6	18.7	18.8	18.3
Sphingomonas ginsengisoli KCTC 12630	18.9	19.2	19.8	18.7	19.1	18.9	19.9	19.1	18.5	19.3	17.7	18.6	19.5	18.2	18.5	18.4	22.5	18.3	19.4	18.8	19.4	19.3	19	19.6	20.3	18.6	18.7	19	18.5	18.7	18.5	18.8	18.5	19.5	18.9	18.6	19.1	19.1	19.1	18.8	18.7	19.4	19.3	19	18.7	19.1	18.3	18.6	18.4
Sphingomonas ginsenosidimutans KACC 14949	19.1	19.3	19.4	19	18.7	20.2	18.1	18.8	20.9	18.7	18.4	18.3	19.2	18.8	19	19.4	19.2	19.6	19	18.9	19.1	18.9	19.2	19.2	18.6	19.4	18.8	18.3	18.7	18.7	18.6	19	18.9	18.9	18.5	19.3	19.3	18.8	19.1	19.1	19.2	20	19.9	19.2	19	18.9	18.8	19.3	18.9
Sphingomonas glacialis CGMCC 1.8957	18.4	19.6	19.5	19.3	18.3	18.5	19.2	19.3	19	18.8	19.1	18.9	18.2	18.3	19.1	18.6	21.8	19.3	18.8	19	18.8	19.6	18.5	19.9	20.5	18.4	18.5	19.7	18.3	18.7	18.5	18.4	19	18.3	18.5	18.7	19.6	18.3	19.1	19.5	18.6	19.2	19.3	19.6	19.3	18.9	18.7	18.7	19
Sphingomonas guangdongensis CGMCC 1.12672	19	19.3	19.4	19	18.8	19.1	18.9	19	18.9	20.8	19.1	18.2	19.1	18.8	18.4	19.8	23.6	19.5	18.7	19.7	18.7	19.5	19.1	19.7	19.3	19.5	18.9	19.5	19	18.9	19.6	18.7	19.3	19.7	19.4	19.2	19.3	19.2	19.3	19.3	18.9	19.2	19.8	18.8	18.8	19.1	18.9	18.8	18.9
Sphingomonas haloaromaticamans P3	19	19.8	19.7	19.1	19	18.8	18.5	19.2	19.4	20.2	19.4	18.7	18.4	19	19	18.9	20.5	20	18.4	19.1	18.4	18.5	18.7	19.7	19.5	19.1	18.7	20.2	18.9	18.9	18.5	19.3	18.5	18.3	18.7	19.1	23.2	19.3	19.1	19.7	19.4	19.2	19.8	20.1	20.2	19.1	18.7	18.7	18.9
Sphingomonas hankookensis KCTC 22579	18.1	19.2	19.7	18.8	19.1	18.6	19.7	18.9	19.4	18.7	18.8	18.3	19.7	18.2	18.8	17.9	20.2	18.2	19	18.7	18.3	19	18.8	20.1	20	18.8	18.1	19.5	18.6	18.2	18.6	18.6	18.7	19.3	18.7	19	19	18.6	19.2	18.8	19.2	19.1	19.2	19.4	18.9	18.8	18.6	18.6	18.9
Sphingomonas hengshuiensis WHSC-8	19.6	19.4	19.7	19.4	18.9	18.6	18.4	19.4	19.9	19.2	18.7	19.3	19.2	18.8	19	18.7	20.3	18.8	18.8	18.9	18.7	18.3	19.1	20.1	20.4	19	18.9	20.8	18.8	19.7	19.3	19	18.3	18.7	18.7	19.3	19.2	19	19.3	19.5	18.8	19.4	19.5	20.5	19.4	18.6	18.5	18.3	18.3
Sphingomonas hominis HHU CXW	18.8	20	19.8	20.1	19.3	19.3	18.8	18.7	20.1	18.7	18.8	18.8	18.9	18.4	19.1	19.2	20.5	23.4	19.1	19.2	18.9	18.9	18.6	20.3	20.5	19.1	18.6	19	18.5	18.4	18.7	19.1	19	19.8	18.8	18.6	19.6	18.8	19	19.1	18.5	20.3	19.5	19.6	19	19.1	18.5	18.6	19
Sphingomonas hylomeconis KCTC 42739	18.9	19.3	19.4	19.7	18.9	18.2	17.5	18.9	18.8	19.3	18.4	18.5	18.2	18.1	18.6	18.7	19.7	18.7	17.9	18.7	19	18.6	18	19.2	18.9	18.4	18.4	18.8	19	18.4	18.3	18.8	19.1	17.4	18.2	18.5	19.1	18.8	19.4	19.4	18.6	19.2	18.9	19.3	19.4	18.8	18.8	19	18.7
Sphingomonas insulae KCTC 12872	19.1	19.5	20.3	19.9	18.6	18.6	20.5	19.5	19.3	19.7	19.3	18.7	19.9	18.5	19	20.1	21.5	19.2	18.8	18.6	19.3	18.3	19	20.8	20.3	19.6	18.8	20.3	18.7	19.1	19.3	18.8	18.5	18.7	18.8	19.4	19.7	18.8	19.4	19.5	19.2	19.2	19.8	20.3	19.5	19.7	19.4	19.5	19.4
Sphingomonas japonica KC 7	18.1	19	19.8	19.3	18.8	18	18.4	19	19.5	18.6	17.5	17.9	18.7	18.3	18.3	19.3	24.3	19.8	18.7	18.8	18.5	18.8	18	19.8	18.3	18.5	18.2	19	17.9	18.8	18.2	17.9	18.7	18.7	18	18.3	18.9	18.4	19.3	19	18.5	19.3	19.2	19.2	18.5	18.6	18.3	18.5	18.3
Sphingomonas jaspsi DSM 18422	18.9	19.3	19.4	19	19.3	18.7	19.6	19.4	19	18.2	18.6	19.3	18.5	19.4	19	19.4	23.9	19.7	18.6	19.4	18.7	18.9	19	18.5	20	19.5	19.2	19.6	19.3	19	18.3	18.2	18.5	19.1	19.8	18.6	19.5	18.8	19.1	19.1	18.8	19.3	19.2	19.9	18.8	18.3	17.8	17.8	17.7
Sphingomonas jatrophae S5-249	18.6	19.5	19.8	20	18.6	18.9	19.2	18.7	18.9	19.4	19	18.8	19.7	18.7	19.4	18.1	21.1	18.8	18.3	18.6	18.5	18.7	18.5	18.8	19.1	18.6	18.7	19.1	18	18.7	18.1	18.4	18.3	19	18.3	18.6	19.4	18.3	18.7	18.8	18.8	19.1	19.4	19.4	19	18.9	18.7	18.9	18.5
Sphingomonas jeddahensis G39	19.2	20	19.7	18.9	19	18.9	20	18.9	19.9	19.1	19	19.3	18.5	18.9	19.2	19	19.1	18.5	18.6	18.8	19.9	19.2	19.1	19.5	19.7	19.1	19.1	19.6	18.7	19.7	19.8	19.1	18.7	19.1	19	19.3	19.9	19.1	19.2	19.2	19.2	19.3	19.9	19.7	19.3	18.8	18.8	19.2	19
Sphingomonas jejuensis DSM 27651	18.2	19.7	19.4	19.7	19.1	18.8	20	18.7	19.2	19	19.6	18.4	19.6	18.4	19.1	20.2	23	21.2	18.3	19.3	19.1	18.2	18.2	20	19.6	18.9	19.6	19.8	18.4	19	19.4	18.1	18	18.7	19.3	19.9	19.7	18.7	18.8	19.5	18.9	19.5	19.5	19.6	19.2	18.5	18.5	18.9	18.8
Sphingomonas jinjuensis YC6723	18.7	19.6	19.9	18.4	18.7	18.8	19	19.1	19.6	19.6	18.5	19.1	18.9	18.5	19.1	19.8	20.6	19.1	18.8	19.1	19.1	18.7	18.7	20.1	19.8	19.1	19.2	19.3	18.5	19.4	19.5	18.6	18.8	18.5	19.2	19.2	19.7	19	19.8	19.6	19.5	19.8	19.7	19	19.5	18.5	19.1	19	18.8
Sphingomonas kaistensis DSM 16846	18.3	19.1	19.4	19.2	18.5	18.5	18.8	19	18.4	18.4	18.4	18.6	18.7	18.9	18.2	19.4	22.9	18.6	18.6	18.6	18.6	19.3	18.1	19.7	19.6	17.9	18.2	19.4	18.3	18.5	17.9	18	18.6	18.9	18.6	18.1	19	18.6	18.7	18.5	18.5	18.4	18.9	19.3	18.7	18.1	18	18.1	17.8
Sphingomonas koreensis KCTC 2882	19.4	19.3	20.1	18.6	19.2	19.1	21.6	20.2	19.4	19	18.8	18.1	18.5	18.9	19.1	19.1	19.8	17.8	18.4	19.2	19.4	18.9	18.9	20	19.5	18.9	18.8	20.7	19.1	18.7	18.2	18.8	18.2	18.9	19.1	19.6	19.7	19.6	19.5	19	20	19.9	19.5	19.7	20	18.5	18.7	18.3	18.6
Sphingomonas kyeonggiensis DSM 101806	19	19.4	19.6	19.3	18.6	18.6	19.4	18.4	19.5	19	18.7	18.5	18.6	19.4	19.4	19.2	20.3	19.1	18.7	18.9	18.9	18.7	19.1	19	19.9	18.8	18.3	20.2	18.4	18.5	18.4	18.4	17.9	18.9	18.5	19.2	19.5	18.1	19.8	19.3	18.9	19.5	19.6	19.4	19.5	18.7	18.4	19	18.5
Sphingomonas kyungheensis LMG 26582	18.6	19.4	19.8	19.1	18.2	18.6	18.9	19.6	19.1	19.9	18	18.2	18.7	18.5	18.7	19.2	20.8	18.7	19	18.9	18.5	18.8	18.7	20.1	19.1	18.4	18.3	19	18.5	19	18.2	19.1	18.2	18.7	18.6	19.2	19.1	18.7	18.9	19.3	18.9	18.9	19.2	19.8	19.2	18.9	18.8	18.7	18.9
Sphingomonas lacunae CSW-10	18.9	19.7	19.4	19.4	19.6	19.1	18.9	19.4	19.5	18.9	19.1	18.9	18.7	19.7	19.3	19.1	20.4	19.2	18.2	19	19.7	19.3	19.2	18.5	19.1	18.7	18.6	19.2	18.9	19.2	19	19.5	18.5	19.7	18.7	19	20.3	20.5	19.5	19.6	20.2	19.3	19.6	20.2	20.2	18.3	18.5	17.9	18.7
Sphingomonas laterariae LNB2	18.3	19.4	19.3	19.1	19	18.3	18.5	18.7	18.6	18.8	19.1	18.7	18.6	18	18.8	18.2	19.5	21.1	17.9	18.4	18.8	18.7	18.7	19.1	19.4	18.8	18.3	18.3	19	19.2	18.8	18.9	18.1	18.6	18.2	19	19.7	18.8	19	19.5	18.7	19.4	19.1	19.5	20	18.5	18.2	18.5	19
Sphingomonas leidyi DSM 4733	18.7	19.6	19.7	19.5	19	19	19.3	19.2	18.9	20	18.6	18.6	18.8	19.5	19	18.8	20.4	19.1	18.6	19	19.2	18.6	19	19.7	19.7	19.2	18.9	21	19	18.8	19.1	19	18.6	19.8	18.8	19.2	19.7	19.2	19.8	19.5	19.4	20	19.6	19.8	19.9	18.8	18.6	18.8	18.6
Sphingomonas lenta 1PNM-20	19.2	19.5	20.3	18.7	19	18.3	19	18.8	19	18.9	18.9	18.3	18.6	18.7	19.1	19.7	29	19.8	19.4	18.5	19.2	19.1	18.7	21.3	20	19.2	18.2	19.4	18.6	19	18.2	18.6	18.1	19.4	19	19	19.3	18.6	18.8	19	19	19.3	19.4	19.5	19.2	18.6	18.5	18.6	18.7
Sphingomonas lutea KCTC 23642	19.9	19.7	19	19.8	18.9	19.3	20.5	18.9	19.7	19.4	20	19.9	19.7	20.2	20.1	19.6	22.4	19.6	19.1	19.8	18.8	18.4	18.9	19	18.7	19.2	18.9	21.5	19.4	18.8	19.4	19.1	19.5	19.4	20.1	19.5	19.5	19.1	18.5	19.3	19.2	19.3	18.8	19.5	18.8	18.7	18.6	18.6	18.6
Sphingomonas mali NBRC 15500	18.8	19.3	20	19.6	19.4	19	18.7	18.7	20	18.7	18.8	19.3	19.1	19.2	19.9	19.1	21.9	18.8	18.7	18.9	19.5	18.8	19.3	19.6	19.1	18.9	19.1	19.3	19.3	18.8	19.5	19.2	18.4	19	19.4	19.3	19.6	19.4	19.2	19.3	19.1	19.2	19.5	20	19	19.1	19.1	18.8	19.2
Sphingomonas melonis DAPP-PG 224	18.8	19.7	20.1	19.9	19.4	19.6	20.1	19	19.6	20.3	19.4	18.6	19.8	18.8	19.1	18.2	21	19.3	19	18.8	19.2	19	19.1	20.1	19.4	19.4	18.9	20.1	18.5	19.2	19.6	19.1	19.1	19.8	19.8	19.2	19.7	19	19.7	19.8	19.2	19.9	19.8	19.9	19.7	18.9	18.9	18.8	18.8
Sphingomonas mesophila SYSUP0001	19.2	19	18.8	18.9	18.7	18.2	18.6	18.5	19.7	21.4	18.2	18.3	19.1	18.8	18.7	22	28.1	19.8	17.7	18.1	19	18.6	18.6	19.4	19.1	19.6	19.1	18.6	18.6	18.6	19.2	18.4	18.6	19.2	18.4	18.5	19.1	19.3	18.7	18.6	19.2	18.4	18.4	20.6	18.2	19.1	18.3	18.4	18.4
Sphingomonas metalli CGMCC 1.15330	19	19.8	19.7	18.9	19.3	18.8	20.2	19.3	19.4	20.3	18.7	19.1	19.6	19.1	19.2	20.5	24.4	19.2	19.6	18.8	19.4	19	18.9	20.2	19.3	19.4	18.7	19.1	18.7	19.4	19.5	18.9	18.3	19.2	19.2	18.8	19.4	19.2	19.5	19.6	19.3	19.6	19.9	20.3	19.1	19.3	19.1	19.4	19.3
Sphingomonas montana W16RD	19	19.1	19.4	20.2	18.9	18.3	18.6	19.4	18.8	19.8	19.7	18.8	20.1	18.8	19.5	19.4	22.2	20.2	18.9	18.8	18.8	19	18.2	19.6	19.1	19.2	18.8	19.6	19.1	18.4	19.7	18.9	18.9	19.3	18.6	18.8	19.6	18.7	19	19.1	19.4	18.7	19	19.9	19.3	19.7	19.3	19.2	18.9
Sphingomonas montanisoli ZX9611	18.7	19.5	20	19.2	19.3	18.6	20.4	19.5	19.5	19.2	18.1	19.1	18.8	19.6	18.5	18.2	20	18.4	18.5	19	19	18.7	19.1	19.2	19.3	19.1	18.3	19.7	18.9	18.6	19.5	19.3	18.3	19.3	18.9	19	19.3	18.9	19	19	19.1	19.2	19.4	19.6	19.5	18.3	18.5	18.8	18.4
Sphingomonas morindae NBD5	19.2	19.4	19.1	20.1	19.1	18.6	21.4	18.4	18.8	22.2	19.5	18.9	20.2	18.7	18.8	20.1	21.6	18.6	19.3	19.2	19.2	18.8	18.5	19.1	18.7	19.4	18.5	19.4	18.2	18.3	20.3	18.8	18.7	19.7	18.7	18.8	19.1	18.2	19.6	18.8	18.6	19.6	19	19.3	19	18.6	19.4	18.8	19.2
Sphingomonas mucosissima DSM 17494	18.8	20	19.7	19.7	19.3	19.5	20.3	18.6	20.2	19.5	18.6	18.7	19.4	19.4	19.6	20.7	21.4	18.8	19.3	19.1	19	18.4	18.8	19.2	19.2	19.3	18.8	20	19.2	19.5	18.7	19.3	19	19.7	18.8	18.5	19.4	19.3	19.7	19.5	19.1	20.1	19.8	19.8	19.6	19	18.9	19.3	18.9
Sphingomonas naasensis DSM 100060	18.8	19.2	20	19.3	19.4	18.9	19.1	19.2	19.2	19	18.1	19.1	18.9	18.6	19.2	18.5	21.3	19.1	18.8	19.3	19	18.7	18.9	19.6	19.4	19	18.8	19.6	18.3	19	19.2	19	18.7	19.2	18.8	18.9	19.3	18.8	19.1	19.7	19.3	20	19.4	19.5	20	18.8	18.7	18.9	18.9
Sphingomonas naphthae KACC 18716	18.4	20	20.5	18.9	19.4	19.5	20.6	19.4	19.9	20.9	19.9	19.1	20.1	19.5	18.7	19.5	22.4	23.7	18.7	18.6	18.7	18.7	18.6	21	19.4	19.9	18.6	19.4	18.9	18.9	19.3	18.6	19	19.4	18	19.1	19.5	18.6	19.5	20.1	19.1	19.8	19.3	21	19.9	19.4	19.1	19.2	19.7
Sphingomonas olei NM83	18.4	19.6	20.2	18.9	18.7	18.9	18	18.8	19	19	18.7	18.5	18.3	18.6	18.6	18.3	20.6	18.6	18.3	19.5	19.1	18.8	18.6	19.5	19.7	19	18.5	19.3	18.6	18.5	18	18.8	18.1	18.7	18.4	18.8	19.5	19	19.1	19.4	18.6	19.6	19.1	19.1	19.4	19	18.4	18.8	18.6
Sphingomonas oleivorans FW-11	18.4	19.7	19.6	18.9	18.7	18.4	19.3	18.5	18.7	20.8	18.1	19.1	19	18.4	18	18.5	19.4	18.3	18.4	18.7	19.1	18.3	18.7	18.5	18.6	18.9	19	18.9	18.5	18.5	18.3	18.4	17.5	18.8	18.2	18.2	19.6	18.9	18.5	19.1	17.6	18.7	19.3	19.9	19.5	19	18.5	18.7	19.1
Sphingomonas oligoaromativorans DSM 102246	18.7	19.1	19.4	18.7	18.7	19	19.2	18.8	19.3	19.3	19.4	18.2	19	18.5	19	18.2	19.2	18.4	19.7	18.5	18.6	18.6	18.4	20.1	19.1	18.8	18.2	19.2	18.4	18.6	19.5	18.5	18.7	18.2	18.6	18.9	18.9	18.9	19	19.1	18.5	19.4	19.5	19.7	19.3	19	18.5	18.8	18.9
Sphingomonas oligophenolica S5_1	19	19.1	19.3	19.5	19.5	18.5	19.4	18.7	18.5	18.6	18.9	19	18.8	18.5	18.3	18.7	25.7	18.7	17.8	19.1	18.9	18.4	18.6	20	20	19.3	18.5	18.9	18.7	18.8	19.7	18.8	19.1	18.7	18.9	18.9	19.7	18.6	19.1	18.8	18.5	18.9	19.3	19	19.3	18.7	18.5	18.1	19.2
Sphingomonas paeninsulae YZ-8	18.4	18.3	18.7	19.7	19.2	19.6	20.2	18.9	19.5	21.1	19.1	18.4	19.4	17.9	18.9	22.2	21	19.4	18.7	20.5	19.2	19	18.7	19.2	18.4	20.2	19.6	21.2	20.1	19	18.4	20.6	19.2	19.4	19.5	18.2	19.6	20.7	20.2	20.2	18.8	19	20	20.3	18.9	19.6	19.2	18.7	18.9
Sphingomonas palmae JS21-1	18.6	19	19.8	19.6	19	19.2	18.4	18.5	18.9	18.3	18.6	18.4	18.3	18.3	19.1	19.3	20.2	19.1	17.9	18.6	19	19	18.9	19.8	19.5	18.2	18.4	19	18.8	18.5	18.2	19.3	18.1	19.8	18.5	18.4	19.1	18.7	19.1	19	18.9	19.6	18.9	19.1	18.6	18.6	18.8	18.4	18.9
Sphingomonas panacis DCY99	19.3	20	19.4	20.1	19.1	18.5	19.8	19.7	19.3	19.6	20.3	18.4	19.7	18.8	19.1	19.4	21.9	19.1	19.7	19.1	19	18.7	18.8	20.8	20.6	19.1	19.1	19.4	19.4	19	20.3	18.7	18.5	19.9	18.9	18.6	19	18.8	19.7	20.3	19.2	19.4	19.9	18.8	19.6	19.2	19.5	19.5	19.4
Sphingomonas panacisoli HKS19	18.3	19.1	19.7	19.1	18.8	19.2	19.1	19	19.2	19.8	18.4	18.9	18.8	18.7	19.4	19.1	21.3	18.3	19.3	19.1	18.7	19	18.6	20.5	19.6	18.8	18.4	18.9	18.8	18.8	19.2	19.5	18.6	18.7	18.8	18.9	19.3	20	19.4	19.6	18.8	19.6	19.4	19.7	19.1	18.4	18.1	18.3	18.3
Sphingomonas panni DSM 15761	19.2	19.4	19.4	18.6	19.3	18.7	19.5	19.6	19.7	20.2	19.4	19.3	18.7	18.5	19.4	18.8	19.1	19.3	18.3	18.9	18.7	19.3	18.7	19.8	19.6	19.2	18.3	19.4	18.8	18.6	18.8	18.5	18.6	18.8	19	19	19.9	19.4	19.1	22.1	19.1	19.4	19.3	26.8	20	19.2	18.9	18.6	18.9
Sphingomonas parapaucimobilis NBRC 15100	18	19.7	19.7	19.3	18.8	19.1	19.3	19.2	19.6	19.9	18.4	19	19.5	18.9	19.3	18.9	20	20.7	18.9	18.8	19.2	18.9	18.7	19.6	18.5	19	18.4	18.9	18.1	18.7	18.9	18.7	18	19	19	19.2	19.5	18.7	19.5	19.4	19.1	20.4	19.9	18.7	19.2	18.8	18.8	18.8	18.4
Sphingomonas paucimobilis NCTC11030	19.1	20.2	20	19.6	19.1	19.2	19.4	19.7	19.6	20.1	18.6	19.4	20.1	19.1	19.7	19.4	21.8	19.5	19.1	19.8	19.5	18.7	19.1	19.9	20.3	18.9	19.3	19.7	19.3	19	18.6	19.2	18.7	19	19.3	18.7	19.1	19.2	19.7	19.7	19.2	20.4	19.9	19.4	19.8	18.9	18.8	19.1	18.9
Sphingomonas phyllosphaerae FA2	18.3	19.4	19.9	19.3	19	19.4	19	18.8	19.1	18.3	18.8	19.1	19.3	18.9	19.1	19.3	21.9	18.8	18.7	19.1	19.4	18.3	18.8	19.1	19.9	18.9	18.7	19.4	19.1	19	19.7	19.1	20.5	19.2	19.1	18.8	19.4	19.2	19.6	19.5	19	19.3	19.4	20.2	19.4	19	19.1	19.1	18.9
Sphingomonas piscis HDW15B	19	19.9	19.8	20.7	19.7	18.7	20.2	19.9	20.2	20.2	19.4	18.6	18.3	18.9	19	20.8	29	19.3	18.4	18.9	19	18.5	18.7	20.2	19.9	19.5	18.4	20.1	18.7	19	19	19.2	18.6	18.9	19.1	19.1	19.7	18.7	19.7	19.4	19.1	18.8	19.5	20.8	18.9	18.8	18.5	19.8	17.9
Sphingomonas pituitosa NBRC 102491	18.8	19.5	19.6	19.4	18.7	18.8	18.1	19.1	19.7	18.6	18.7	19	19.7	18.6	19.1	18.1	19.5	18.9	18.6	19	19	18.5	18.8	19.3	19.3	19	18.6	19.3	18.9	18.8	19.7	19	18.1	18.8	18.5	18.8	19.2	18.5	19.5	19.4	18.9	19.8	19.5	19.3	19.1	18.3	18.6	18.5	18.7
Sphingomonas pokkalii L3B27	19	20	20.4	19.3	18.9	19	19.3	19	19.6	18.6	18.4	19.2	19	19	19	19.2	22.4	19.9	18.8	18.8	19.2	18.7	18.8	19.6	20.4	18.8	18.8	19.2	18.7	19.1	19	18.8	17.8	18.8	18.6	19.6	19.7	18.6	19.4	19.2	19.3	19.6	19.9	19.7	19.9	18.8	18.9	18.7	18.4
Sphingomonas populi 3-7	18.6	19.3	19.9	19.7	18.8	18.5	19.4	19.3	19.3	18.6	18	19.4	19.5	18.3	18.8	18.5	20.4	18.3	19.2	19	18.8	18.1	18.9	20.7	19.6	18.9	18.1	18.2	18.7	18.6	19	18.7	18.8	19.4	18.8	18.7	19.1	18.4	19.3	19.9	18.6	19.7	19.8	18.9	19.4	18.8	18.9	18.5	18.8
Sphingomonas prati W18RD	18.5	19.5	19.5	19.4	19.3	18.6	18.8	18.7	19.3	19.1	18.8	18.7	19.5	18.9	18.6	19.6	20.5	20.2	18.8	18.6	19	19	18.5	20.3	19.4	19.7	18.8	19.8	19.1	18.7	18.8	18.5	19.5	18.8	18.5	19.1	19.8	18.3	18.9	19.3	18.7	19.2	19.3	20	19	19.1	18.7	18.8	19.4
Sphingomonas profundi LMO 1	18	19.4	19.7	19	18.9	18.4	19.4	18.8	19	20	19.8	18.8	19.9	19	18.8	18.7	24.2	20.8	18.1	18.8	19	18.3	18.4	20.3	19.2	19.2	18.4	19.3	19.4	19.2	19.1	18.8	18.4	18.8	18.6	19.9	19.9	19	19	19	18.6	19.3	19	19.9	19	18.8	19.3	18.9	19.3
Sphingomonas pruni NBRC 15498	19.4	19.6	20.4	19.6	19.3	19.1	19.2	19.4	20.7	18.9	19.4	19.6	19.3	18.9	19.4	18.9	21	19.9	19.5	18.7	18.9	18.6	19.2	19.8	19.9	20	18.6	19.6	19.3	19.5	18.8	19.9	18.7	19.4	19.2	19.8	19.9	20.1	19.8	19.6	19.3	19.8	19.7	20.2	19.3	18.8	18.6	18.5	18.9
Sphingomonas pseudosanguinis DSM 19512	18.7	19.7	19.8	19	19.5	18.9	19.3	19.1	19.7	18.9	18.3	18.7	18.9	18.6	19.3	18.4	19.7	18.9	18.3	18.5	19	18.3	18.7	19.5	19.5	19.3	18.4	19.1	18.6	18.9	18.4	18.9	18.3	19.2	19	18.9	19.3	18.8	19.6	19.5	19.2	19.9	19.7	19.3	19.8	18.8	18.7	18.6	18.9
Sphingomonas psychrolutea CGMCC 1.10106	18.7	19.1	18.7	19.5	18.1	18.7	18.6	19.1	18.6	18	18.1	18	19	18.7	18.4	19.6	22.3	19	18.7	19.1	18.3	18.5	18.1	19.9	19.5	18.8	18.4	19.1	18.2	18.6	18.9	18.7	17.9	18.2	18.3	18.7	18.8	18.2	19.2	19.4	18.5	19	18.8	20.2	18.7	18.7	19.3	19.3	18.4
Sphingomonas psychrotolerans Cra20	18.5	19.2	19.9	19.4	18.8	19.1	19.1	19.4	19.6	20.2	19.1	18.9	19	18.5	19	18.8	20.5	20	18.5	19	19	18.3	18.4	19.5	20	18.7	18.5	19.8	19.1	18.7	19.1	18.7	18.8	19	18.9	19.6	19.7	18.6	19.4	19.2	19.1	19.4	19.4	19.6	19.4	18.8	18.4	18.6	18.5
Sphingomonas qilianensis KCTC 42862	18.3	19.1	19.1	18.4	18.8	18.6	19.7	19.1	19	19.3	19.9	18.2	18.2	18.2	18.9	18.4	20.9	18.6	18.5	18.6	18.9	18.1	18.4	19.7	19	19.1	17.9	19.1	18.5	18.7	18.9	18.6	18.6	17.6	18.2	18.8	19.4	18.8	18.8	19.2	18.7	18.9	19.1	18.9	19.2	19.2	18.9	19.1	18.8
Sphingomonas quercus XMGL2	18.6	20	19.5	18.7	19.4	18.1	21.2	18.5	18.8	19	18.6	18.7	20.3	18.9	18.3	19.3	21.7	18.8	17.9	18.6	18.6	18.4	18.3	19.7	19.4	18.8	18.2	19.2	18.2	18.5	18.5	18.5	18.2	18.8	18.6	19.2	19.5	18.9	19.6	18.7	18.5	19.4	19.6	19.1	18.9	18.9	18.6	19	18.9
Sphingomonas radiodurans S9-5	18.6	19.1	18.9	19.5	19.2	19.4	19.7	19.1	19.8	20.9	19.7	18.9	20.3	19.3	19.1	21.2	22.4	19.6	18.3	19.3	19.1	18.7	18.7	20.8	20.8	18.9	19	20.8	18.9	18.8	19.2	18.4	19.5	19	18.8	19	19.1	18.3	19.2	19.2	19	19.3	19	19.3	19	18.9	18.9	18.8	18.8
Sphingomonas rhizophila KACC 19189	18.8	19.3	19.7	19.1	19	18.9	18.7	19.4	19.1	19.9	19.5	18.7	19	19.1	18.8	19	22.5	20	18.3	18.7	19.4	18.9	18.8	20.4	19.9	19.1	18.6	19.9	18.6	18.7	17.8	18.8	18.7	19.2	19.1	18.7	19.8	19.3	19.2	20.2	18.8	19.9	19.4	19.9	19.6	18.4	18.4	18.5	18.4
Sphingomonas rubra CGMCC 1.9113	19.2	20	19.6	21.1	19.3	19.7	24.1	20.3	19.8	22.3	21.5	19.8	21.1	19.3	19.5	22.1	31.7	21.8	19.5	19.2	19.2	18.7	19.4	21	21	19.6	18.9	21.3	19.6	19	19.8	18.5	19.3	19.4	19.8	19.9	20	20.3	20.4	19.4	19.2	19.5	20.1	23.4	19.8	19.3	19.5	19.8	19.4
Sphingomonas sabuli sand1-3	19	19.3	19.6	18.5	18.8	18.9	18.8	18.9	19.1	21.2	18.8	18.8	19.1	18.7	19.2	19	23.6	20	18.8	18.9	19.1	19.3	18.6	19.4	19.3	19.1	18.6	19.7	19.5	18.6	18.5	18.9	17.2	19.1	19.3	18.9	19.2	18.8	19	18.6	19.3	19.2	19.8	20.1	18.7	18.7	18.1	18.2	18.2
Sphingomonas sanguinis NBRC 13937	18.7	19.6	19.8	19.3	19.1	19.5	19.1	19.2	19.5	18.6	18.4	18.7	19.4	19.2	19.5	19.2	19.2	19.4	18	19.8	19.6	19	19.1	19.8	19.3	19.5	19.1	19.3	18.7	19.2	17.9	19.5	18.3	18.7	19.6	18.6	20	18.8	19.1	19.3	19	20.3	19.6	18.9	19.6	18.9	18.5	19.3	18.9
Sphingomonas sanxanigenens NX02	18.8	19.5	20	19.2	18.8	19.2	19.3	19.3	19.6	20.8	20.2	19.8	18.5	19.3	18.9	18.5	20.7	20.1	18.4	19.8	19.1	19	18.8	20.8	19.7	18.8	19	19.5	18.9	19.3	19.3	18.5	18.1	18.8	18.7	19.6	19.4	18.7	19.5	19.4	19	19.6	19.8	19.7	19.7	19.1	19	18.8	18.8
Sphingomonas segetis YJ09	18.9	19.7	19.9	20.1	19.1	18.1	19.1	18.4	18.7	22.2	20.6	18.2	20.6	18.4	19.3	27.1	27.3	21.9	19.8	18.5	19.4	18.8	18.7	19	20	18.8	18.9	20.4	19.2	18.8	19.6	18.8	19.1	19.3	19.2	18.5	19.1	19.1	18.8	18.8	18.7	19.3	19.3	19.1	19.5	18.4	18.5	18.5	18.6
Sphingomonas sinipercae HDW15C	19	19.4	19.8	19.5	19.6	18.9	20.2	18.7	19.4	20.2	19.8	18	20.2	18.9	18.8	19	21.5	19.9	18.8	18.9	19.3	18.6	19.4	19.8	19	20.4	18.7	20.5	19.9	18.7	19.5	19.1	18.9	20.5	19.7	18.9	19.9	19.6	19.1	19.8	18.9	20	19.5	20	19	18.7	18.5	18.5	19.2
Sphingomonas solaris R4DWN	18	19.3	19.6	18.3	18.5	18.2	18.5	18.6	19.4	19.9	19.3	18.4	18.9	18.5	18.4	18.3	20.3	18.9	19.6	18.4	19	19	18.4	18.9	19.6	18.7	18.6	18.7	18.1	18.6	18.9	18	18	17.9	17.8	18.6	18.8	18.5	19	18.8	18.5	19.3	19	19.2	19.6	18.6	18.8	19.1	19.5
Sphingomonas soli NBRC 100801	19.3	19.3	19.5	19.1	18.9	18.9	19.5	19.5	19.1	18.9	20	19.4	18.5	18.7	18.7	18.5	20.9	19.2	18.6	18.2	19	19	19.3	20	20.5	18.6	18.8	19	18.8	19.2	19.4	19.1	18.4	18.7	18.7	18.6	19.6	18.9	19.5	19.1	19.4	19.6	19.8	19.9	19.5	19.2	19	18.8	19.1
Sphingomonas spermidinifaciens 9NM-10	18.5	19.1	19.4	19.2	19.3	18.4	19.2	19.7	19	20.5	19.3	18.8	18.3	18.5	18.8	19.2	21.7	18.5	18.7	18.5	18.4	19	18.4	20.5	18.8	19.4	18.6	19.5	18.6	19	19.2	18.1	17.9	19.1	18.3	18.3	18.8	18.6	18.9	18.9	19.5	19	19.3	19.6	19.1	18.6	18.6	18.2	18.4
Sphingomonas suaedae XS-10	19.2	19.6	19.6	19.2	19.1	18.9	19.1	19.9	19.7	18.7	18.7	18.8	18.9	18.3	19	20.2	19.7	17.7	18.2	18.8	19.4	18.6	18.9	20.9	19.5	18.7	18.9	19.1	18.6	18.8	19	19	18.7	19.5	18.6	19.7	19.4	19.1	20.1	19.7	18.9	19.8	19.7	19.4	19.7	18.6	18.4	18.3	18.6
Sphingomonas trueperi DSM 7225	18.7	19.6	19.5	19.7	18.7	18.8	18.9	19.5	19.4	18.8	18.5	19.1	18.8	18.6	19	19	19.5	18.3	18.8	18.6	19	18.5	19	20	20.2	19.2	18.3	20.1	19.3	19	19.3	18.7	18.5	18.7	18.8	19.6	19.7	18.6	19.1	19.4	19.2	19.8	19.4	19.8	19.9	18.7	18.3	19	19
Sphingomonas turrisvirgatae MCT13	18.8	19.4	19	19.6	18.5	19.1	18.8	19	19.7	18.6	18	18.8	19.3	18.9	18.6	18.8	20.3	19.9	18.3	18.7	19.2	18.8	18.8	19.8	19.6	18.5	18.2	18.7	18.5	18.5	18.7	18.6	18.6	19.6	18.3	18.8	19.1	18.4	19.6	19.8	18.7	19.2	19.4	20.5	19.4	18.6	18.4	19	18.8
Sphingomonas vulcanisoli CECT 8804	18.9	19.5	19.6	19	18.9	18.8	20.4	19.6	19.2	19.1	19	18.7	19.5	19	18.7	19.3	22.9	18.5	18.9	19.3	18.9	19.2	18.5	20	19	18.4	19	19.4	18.3	19.2	18.3	18.7	18.1	18.5	18.7	18.8	18.9	19.1	19.8	18.8	18.7	19	19.2	19.1	18.8	18.9	18.5	18.5	19
Sphingomonas xinjiangensis DSM 26736	18.1	19.5	19.5	19	18.4	18.4	19.3	19.1	19.8	19.2	19.1	19.4	19.6	18.8	19	18.9	21	19.1	19.6	18.6	18.5	19.7	18.2	19.4	20.5	18.4	18.3	18.9	19.3	18.1	18.9	18.2	18.4	18.7	18.4	18.8	19.6	19.5	19	19.4	19	19	19.2	19.8	19.4	18.9	18.5	18.4	18.4
Sphingomonas yabuuchiae DSM 14562	18.9	19.3	19.7	19.8	19.3	19.3	19.5	19.6	19.8	19.2	18.1	18.4	20	18.9	19.1	18.6	19.2	20.5	18.3	19	19.4	18.7	18.8	19.6	18.9	19	18.6	18.8	19.4	19.1	18.3	19.2	18.2	18.7	19.6	19	19.5	18.9	19.6	19.5	18.8	20	19.7	19	20	18.7	18.7	18.9	19.1
Sphingomonas yantingensis DSM 27244	18.2	19.2	19.8	19.1	19.3	18.6	18.5	18.9	18.8	19.6	18.4	18.7	19.3	18.2	18.6	18.7	21	19.1	17.9	18.5	19	18.7	18.7	19.5	19.4	18.4	18.8	18.6	18.9	19	17.7	18.5	18	19.7	18.6	18.8	19.4	18.6	19	19	18.8	19.3	19.5	19.9	19	18.6	18.2	18.8	18.6
Sphingomonas yunnanensis CCTCC-AB-204064	18.2	19.4	20.3	19.6	18.5	18.8	19.5	19.3	19.4	17.6	17.5	18.7	19	18.6	18.7	19.3	23.5	19.8	18.9	18.8	19.1	18.4	19.1	20	20	18.8	18.7	19.6	18.8	19	18.8	18.8	19.3	18.9	19.1	19.4	19.4	18.7	19.7	19	19.2	19.2	19.1	19.7	19	19	18.7	18.6	19.2
Sphingomonas zeae CCM 8596	18.7	19.4	20.2	18.7	19.1	18.8	19.5	19.5	19.6	19.5	17.9	18.2	18.9	19	19.5	18.8	19.5	18.5	19	19.7	19.6	19.1	19	19.7	19.1	19.2	18.9	19.1	19.3	19	18	18.7	18.4	19.3	19.5	19.2	19.7	19.1	19.8	19.8	19	20.5	19.8	18.8	20.1	18.9	19	19.1	19.1
Sphingomonas zeicaulis DSM 100587 ga0373354 contigs	18.8	18.9	19.6	19.7	19.2	19.1	19.1	18.9	18.9	20	18.5	18.7	18.6	19.1	19.1	18.7	20.5	18.2	18.7	19.5	19.1	18.9	19.1	19.2	19.4	18.9	18.5	19.3	18.8	19.2	18.9	18.6	18	18.5	18.3	19.2	19.7	18.4	19.3	19	18.7	19.7	19.7	18.8	19.6	18.8	18.8	18.6	18.5
Sphingopyxis alaskensis RB2256	18.8	19.1	19	19.1	19.4	19.4	19.8	19.3	20.6	19.4	18.9	18.6	18.2	20.2	19	18.5	21.3	19	18.8	19.6	19.6	19.3	19	19.7	19.7	18.6	18.4	19.8	19.3	18.6	18.3	18.7	18.4	19.6	19.2	19	19.7	19.5	19.5	19.5	19	20	19.4	19.8	20	18.5	18.4	18.5	18.5
Sphingopyxis bauzanensis DSM 22271	18.7	19.3	19.1	19.5	19	18.9	19.4	19.1	19.4	18.5	18.7	18.5	18.6	19	19	18.6	20.9	19.5	18.8	18.9	19.6	18.8	19.1	19.3	19.5	18.7	18.5	19.4	18.7	18.6	18.8	18.8	18.8	19.2	19.3	18.8	19.7	18.9	19.2	19.1	19	19.2	18.7	20.6	19.3	18.5	18.3	17.8	18.2
Sphingopyxis flava R11H	18.4	18.8	19.8	20.3	19	18.5	18.7	18.5	19.4	17.7	17.8	18.6	18.1	20.3	19.4	18	23.5	19.5	18.4	18.7	18.8	19	19.3	19.2	18.5	19	18.2	19.6	19.1	19.7	17.7	18.1	17.9	18.9	19.3	18.8	20.4	18.9	18.9	19	19.1	19.6	18.7	19	19.3	18.7	18.5	18.4	18.7
Sphingopyxis fribergensis Kp5.2	18.7	18.7	19.3	19	19.2	19.1	19.1	18.8	19.1	19.3	18.7	19	18.1	19	18.8	18.6	21.6	19.7	18.7	18.8	18.8	18.8	18.5	20	19.3	18.9	18.6	21.3	18.9	18.3	20.1	19	18.1	19.3	18.4	18.5	31.7	19.8	19.8	19.1	19.1	19.5	19.2	19.9	19.1	18.7	18.2	18.2	18.5
Sphingopyxis granuli NBRC 100800	18.8	19.2	20.3	19.6	19.4	19.9	18.3	19.5	22.1	18.3	19.4	19.3	18.8	19.5	19.5	19.2	21.7	19.8	18.6	19	18.8	18.6	19.2	19.5	19.4	19.1	18.8	18.7	18.9	19.3	18.6	18.6	18.5	18.5	19.5	19.1	19.5	17.9	19.6	19.2	19.1	19.7	19.3	20.8	19.3	18.7	18.5	18.8	18.5
Sphingopyxis indica DS15	22.4	19.2	19.5	18.9	19.3	18.9	20.3	23.4	19.3	18.8	19.7	18.7	18.8	21.4	20	20.7	23.8	24	18.6	19.1	19.7	18.8	19	19.5	19.6	18.9	19.1	21.5	19.4	19.3	19.3	19.2	23.4	19.7	21.8	19	22.6	21.9	19.6	19	19	19.2	19.3	19.6	19.7	18.4	18.5	18.4	18.7
Sphingopyxis italica DSM 25229	18.8	18.7	19.2	19.2	19.1	18.6	19	19.3	19.4	19.4	19.5	18.5	18.5	19	18.9	19	20.9	18.4	18.6	18.9	19.5	19	18.8	20	19.3	18.1	18.1	18.2	18.6	18.8	19.9	19.1	18.5	18.9	19	18.6	18.6	18.8	19.3	19.1	19	19.8	19.4	18.9	19.1	18.2	18.5	18.5	18.3
Sphingopyxis jiangsuensis XHP0097	18.7	19.8	19.5	19.8	19	18.9	18.4	20.3	19.8	18.9	19.2	19	18.8	18.9	19.6	20.9	23.1	19	18.6	19.5	20	19.3	19.1	19.6	19.5	18.9	18.9	19	19.1	20	19	18.2	19.1	18.7	19	19	19.2	19.7	19.7	19.2	19.8	19.5	19.5	19.5	18.8	18.2	18.2	18.4	18.1
Sphingopyxis lindanitolerans WS5A3p	19.4	19	19.6	19.1	18.9	18.7	18.9	19.1	19.3	19.2	19.3	18.5	19.4	18.9	18.9	18.8	22.2	22.5	19.1	19.2	19.2	18.7	18.9	19.2	19.5	18.9	18.8	19.4	19	18.8	19.3	18.9	18.3	19	18.7	18.4	20.1	18.9	19.4	19	19.1	19	19.2	19.4	19.1	18.4	18.2	18.3	18.3
Sphingopyxis macrogoltabida 203	19.2	18.8	19.4	18.7	19.3	20.2	18.4	19	20.2	19.1	18.6	19.1	18.8	18.9	18.6	20.1	22.1	19.2	18.7	19.1	18.7	18.8	18.8	18.8	18.6	18.7	18.5	18.9	18.6	19	19	18.8	18.7	19.2	19	18.8	20.6	19.1	19.7	21.7	19.2	21.2	19.7	19.9	19.7	18.2	18.3	18.5	18.2
Sphingopyxis panaciterrae DSM 27164	18.9	19.2	19.4	19.4	19.2	19	18.5	19.6	19	19.7	19	18.5	18.7	19.1	19.2	20	21.2	19.9	18.9	19.1	19.3	18.5	19.1	19.8	19.2	18.4	19	18.8	18.8	19.3	19.1	18.6	19.1	19	18.9	18.7	19	19.1	19	18.9	18.9	19.3	19	19.6	19.4	18	18.2	18.3	18.4
Sphingopyxis panaciterrulae DSM 27163	18.7	19.3	19.5	18.6	19.3	18.5	18.6	19.3	19.4	18.4	18.3	18.7	18.7	18.5	19.1	18.3	20.2	19.4	18.6	18.4	19.3	18.6	18.9	19.5	18.8	18.4	18.1	18.9	18.5	18.7	18.7	18.9	18.4	18.9	18.8	18.8	19.2	18.2	19.2	19	18.6	19.3	19.2	19.8	19	18.7	18.2	18.2	18.3
Sphingopyxis soli BL03	19.2	19.4	19.5	19.1	19.3	19.1	18.8	19.6	19.7	18.7	19.2	18.6	18.7	19	19.4	18.8	21.1	20.6	19	19.1	19.6	18.4	19.3	19.3	19.2	19.1	18.8	19.9	18.8	19.2	19	18.7	18.6	19.2	19.8	19.2	19.4	18.8	19.6	18.9	19.3	19.6	19.5	19.5	19.6	18.6	18.5	18.9	18.7
Sphingopyxis solisilvae R366	19.4	19	19.8	19.4	19.7	19.8	19	19.3	19.7	19.3	18.8	18.8	18.3	19	18.9	18.3	21.9	18.8	18.5	18.6	19.9	18.4	19	19.8	19.3	19.3	18.8	19.8	19	19.4	18.3	18.9	18.4	19.4	19.2	19.1	19.6	19.3	19.5	19.5	19.3	19.5	19.3	19.6	19.3	18.3	18.3	18.6	18.2
Sphingopyxis terrae NBRC 15098	19.2	18.9	19.4	18.8	19	19.4	19.2	19.6	20.3	19.5	18.7	18.9	18.8	19.3	19	18.5	20.8	18.9	18.3	18.9	18.8	18.6	18.6	19.9	19.5	18.5	18.6	19.9	18.8	18.9	18.5	18.4	18.1	19.1	18.9	18.8	19.6	19.3	19.5	19.3	19.3	20.2	19.6	19.3	19.3	18.3	18.5	18.7	18.6
Sphingopyxis ummariensis DSM 24316	19.2	18.7	19.3	19.4	19.5	19.3	19.2	19.7	19.6	20	18.7	19	19.2	19.4	19.2	18.8	23	20.1	18.3	18.9	19.3	19.2	18.7	19.6	19.1	18.9	18.6	19.7	18.7	18.8	19	18.6	18.3	18.8	19.1	19.3	19.1	19.5	19.4	19.3	19	19.9	19.9	19.6	19.5	18.4	18.3	18.9	18.4
Sphingopyxis witflariensis DSM 14551	18.9	18.9	19.4	18.9	19	18.7	19.5	19.1	19.1	18.8	18.9	18.7	18.5	18.7	19	19.4	21.9	20.7	18.3	19.5	18.5	19.4	19.3	20.4	20	18.9	18.8	20.2	19.2	19.2	19.5	18.8	19.2	19.1	19.4	19.4	20.1	19.4	19.6	19.7	18.7	19.4	19.4	20.1	19.1	18.2	18.3	18.5	18.5
Sphingorhabdus arenilitoris CECT 8531	18.1	18.8	16.5	19.7	18.6	16.8	18.2	17.3	17.3	17.2	19.9	18.2	18.7	18.2	18.7	17.2	18.9	18.4	16.7	16.7	19.3	19.5	22.9	19.3	17.8	19.6	18.6	18.4	18.3	18.3	18.3	17.4	18	20.1	18.6	19.7	18.1	20.9	19	19.2	17.9	19.2	18.4	17.1	19.5	14.1	16.9	14.1	16.2
Sphingorhabdus contaminans KCTC 32445	18.7	18.7	20.5	19.4	18.9	18.6	18.6	20	19.4	19.7	19.2	18.9	18.6	19.3	18.7	19.6	22.6	19.7	19	19.4	21	18.8	19.1	19	19.2	19.6	18.7	18.5	21.1	19	18.6	19.2	18.9	18.9	19.5	19.6	20.3	20	19.5	19	18.1	19.1	19.6	19.7	18.3	17.6	18.5	18.2	16.9
Sphingorhabdus lacus IMCC1753	20.2	18.3	21.3	20.3	20.2	18.9	17.6	19.6	19.4	18.5	18.4	19.2	18.4	19	18.7	18.4	21.3	19.9	18	20.3	18.6	18.6	18.3	18.8	20	19.8	18.1	19.3	20.1	19.1	19.6	19.6	18.7	20	19.2	19.1	20.2	20.1	19.6	19.1	18.6	19.5	18.5	21.7	18.4	17.8	17.8	17.6	17.1
Sphingorhabdus lutea LPB0140	26.8	36.4	39.3	27.8	34.9	34.6	28.9	37.7	36.7	23.5	37.2	28.3	31.6	29.1	31.6	24.1	29.4	34.2	24.3	31.3	30.8	26.3	32.9	39.2	29.1	33.5	31	22.3	32.5	34	23.2	27.1	27	30.8	31	36.7	36.8	27.8	30.7	31.3	30.4	29.5	41.6	29.5	34.8	32.6	32.6	32.5	32.6
Sphingorhabdus profundilacus IMCC26285	20.4	18.8	19.7	20.2	19	19.3	19.5	20.2	19.1	20	18.9	19.9	18.5	19.1	20	18.8	19.7	19.5	19.8	20.3	20.5	19.2	20	18.9	19.2	18.8	20.2	19.5	20.1	20	19.3	19.9	19.8	19.4	19.5	19	20	20.8	19.4	19.2	18.6	19.6	19.6	20.2	18.7	19.2	18.6	18.6	18.1
Sphingorhabdus pulchriflava GY_G	18.8	19.2	19.9	19.3	19.1	18.6	19.2	18.6	19.3	19.1	18.3	19	18.6	18.4	19.5	19.4	20.6	18.8	17.9	19	18.6	19	19.1	19.6	18.8	18.5	17.6	18.8	18.6	18.3	19.2	18.6	18.3	19	18.4	18.5	19.4	19.2	19.5	19.4	18.7	19.2	19.4	19.8	19.7	17.9	18.8	17.6	18.3
Sphingorhabdus rigui DSM 29050	19.1	17.3	19.1	19.1	18.8	20.6	20.4	19.3	19.6	20.7	19.2	18.7	19.5	18.6	19.3	19	20.8	17.7	18.4	19	20.7	19.4	19.4	18.2	18.7	18.5	18	20.3	19	18.7	18.7	19	18.8	18.3	19.6	18.7	22.5	20.3	20.1	19.7	18.5	19.5	19.4	18.5	19.5	20.8	22.6	19	20.3
Sphingorhabdus soli D-2Q-5-6	19.2	19	19.3	19.3	19	18.8	19.2	18.7	19.7	19.5	19.9	18.2	20.4	18.1	18.7	18.9	20.7	19.1	18.5	19.3	19.2	18.8	19	19	18.7	18.8	18.3	18.5	18.2	19.1	19.8	19.1	19.2	19.8	19	18.4	19.4	19.1	19.5	18.8	18.8	19	19.2	20.1	18.9	18.3	18.1	18.1	18.2
Sphingorhabdus wooponensis 03SU3-P	23.5	19.2	20.5	20.6	20.6	25.4	19.5	19.4	20.9	19.8	20.2	21.2	18.7	21.1	21.6	19.7	20.7	20.2	19.9	22.1	20.9	18.8	18.2	20.3	18.4	22.4	20.5	19.8	21.4	19.6	19.1	20.1	19.7	18.3	20.8	22	24.1	19.6	19.2	19.1	20.8	18.9	20.1	21.5	19.4	23.4	24.4	26.3	26.3
Sphingosinicella flava KCTC-82357	18.7	19.8	24.2	20.4	19.3	19	19.5	19.2	19.9	19.7	19.4	18.9	19.6	19.1	19.4	19.4	22.1	19.5	18.7	18.8	19.4	18.3	19.3	20.2	18.9	18.9	18.9	19.3	18.9	18.9	19.3	19.7	18.4	19	19	20.3	20	18.9	20.6	19.9	19.4	19.8	19.9	20.9	19	18.2	18.3	19	18.7
Sphingosinicella ginsenosidimutans BS-11	18.7	19.5	19.5	19.2	19.1	19.1	18.6	19.3	18.9	17.7	19.1	19	18.8	18.5	19.4	19.1	22.4	18.8	19.7	18.8	19.5	19	18.9	19.8	18.8	19	18.7	19.6	18.7	18.9	19.2	18.9	18	19.6	19	19	19.7	18.8	19.2	19.7	19.8	19.1	19.7	19.9	19.1	19.1	18.4	19.1	18.7
Sphingosinicella humi QZX222	20.1	19.9	20	19.4	19.1	19.9	20.1	18.9	20.1	19.5	20.3	19.1	20.5	20.2	19.4	18.8	28.8	18.9	19.5	18.9	20.4	19	19.5	19.9	19.2	19.8	19.3	20.3	19.7	18.9	20.3	19.5	18.9	19.4	20	18.6	19.8	19.6	19.2	19	19	19.4	19.3	19.7	19.4	18.5	18.5	19.1	18.6
Sphingosinicella microcystinivorans DSM 19791	18.5	18.6	19	19.8	18.4	18.7	20	18.8	18.4	20.8	19.7	18.1	19	18	17.6	18	21.4	19.4	19.2	18.5	18.6	17.8	18.5	20.1	19	19.3	18.1	21.6	18.8	18.1	18.6	18.5	19.2	19.1	18.6	18	18.9	18.3	19.2	18.8	17.9	19.4	19	19.3	18.7	18	18.5	18.3	18.3
Sphingosinicella soli DSM 17328	18.5	18.8	19.2	19.4	18.5	18.2	20.1	18.1	18.6	19.4	19.7	18	19.1	18.5	18.1	18.7	22.9	20.3	18.7	18.3	18.8	18.3	18.4	18.2	19.4	18.4	18.7	19.6	18.5	18.5	19	18.6	18.3	18.6	18.6	18.6	19.3	18.1	19	18.9	18.3	19.2	19.4	18.7	18.3	18.5	18.2	18.5	18.7
Sphingosinithalassobacter portus FM6	19.8	19.6	19.4	19.7	19	19.4	19.3	21	19.8	18.6	19.3	18.9	19.7	19.1	19.4	21.8	20.8	20.1	19.1	19	19.9	19.4	19.6	19.2	19.4	19.1	19.8	19.2	19.4	20.6	19.3	19.6	21.3	20.2	20.1	19.6	22.7	19.4	19.3	19.4	19.8	19.7	19.6	19.5	19.7	18.6	18.9	19.5	18.7
Sphingosinithalassobacter tenebrarum zrk23	19.1	19.2	18.9	20	19	19.2	28.3	20.3	19.7	19.3	19.7	19.5	20.3	20.3	20.7	18.9	22.5	21.8	18.4	19.8	20.3	18.4	18.8	20	19.5	19.2	19.6	20.5	19.2	19.3	19.5	19.5	19.4	19.2	19.8	19.5	20.2	25.8	19.3	19.7	19.4	19.3	19.5	19.5	19.2	18.9	18.9	18.7	19
Stakelama flava CBK3Z-3	18.2	18.9	19	19.6	19	18.3	18	19	18.5	19.1	18.4	18.9	19.5	18.4	18.6	18.2	19.6	19.1	18.4	18.4	19.3	18.9	18.7	19.2	19.1	19.1	18.1	18.6	18.4	18.8	18.9	19	18.5	19.1	18.8	19.2	20.6	19.4	19.2	19.6	18.6	19.3	19.9	19.2	18.2	18.8	18.5	18.8	18.3
Stakelama pacifica DSM 25059	21.2	19.4	19	18.8	19	19.4	18	18.9	19.3	19.3	20.3	19.4	20.2	18.1	19	18.8	21.3	27.3	18.8	19.7	19.2	18.8	18.8	19.1	19.2	19.1	18.7	21.3	19.4	19.6	18.5	19.3	18.4	19.6	18.3	19.8	23.4	19.4	19.3	19.3	18.7	19.2	19.2	19.5	19.2	18.9	18.2	18	19.2
Stakelama sediminis DSM 27203	19.8	18.8	18.7	20.1	19.2	18.4	19.1	21.1	18.4	17.9	19.9	19.1	20.1	18.9	18.9	18.7	19.7	18.3	18.9	19	18.8	19.2	18.7	18.5	18.9	18.7	18.7	19.7	18.3	18.6	18.8	18.5	18.4	18.7	18.9	19.1	19	19.6	18.9	18.4	18.6	19.3	18.9	20.7	19	18.7	18	18.4	18.2
Thermaurantiacus tibetensis SYSU G02173	18	18.6	19.3	18.5	18.3	19.3	28.7	19.6	18.8	24.1	18.7	18.8	21.9	19.6	18.3	22.6	25.8	22.9	19.6	20.2	18.1	19.1	19	19.7	23.5	21	18.9	29.5	18.4	18.6	18.2	17.7	19	19	18	18	18.4	17.7	17.9	17.7	18.5	18.2	17.9	22.4	17.9	17.7	17.3	17.4	18.4
Tsuneonella aeria 100921-2	18.4	19.2	19.7	19.2	18.8	19.1	19.4	19.3	18.6	18.3	18.9	18.8	18.9	18.6	18.6	19	19.3	19.4	18.3	18.1	19.5	18.5	18.9	18.8	19.1	19	19.1	19.8	18.8	18.6	18.8	18.3	18.3	18.9	18.6	18.7	19.3	19	18.9	18.8	19.1	20	19.4	18.6	18.8	17.7	18.2	18.2	18.2
Tsuneonella amylolytica NS1	18.4	19.1	19	18.5	18.7	18.8	18.6	19.1	18.9	18.4	18.3	18.4	18.2	18.9	18.9	18.5	19.8	19.2	18.5	18.3	19.4	19.1	19.1	19.6	19.4	18.9	18.9	18.6	18.8	18.8	18.2	18.6	18.7	18.6	18.6	18.7	19.4	18.6	19.1	19	19.3	19.4	18.9	19.2	18.8	18.9	18.5	18.4	18.2
Tsuneonella deserti CGMCC 1.15959	18.9	19.3	19.2	18.1	19.4	18.9	17.5	18.7	18.9	19.2	18.1	18.9	18.7	19	18.5	19.3	19	20.1	18.4	18.1	19.6	19.1	19.2	18.5	19.2	18.8	18.6	18	18.8	19.1	17.7	18.6	18.5	18.2	18.8	18.6	19.2	18.7	19.3	19.4	19.3	19.6	19.4	18.8	19.4	18.6	18.7	18.5	18.4
Tsuneonella dongtanensis KCTC 22672	19.1	19.3	19.4	19.1	19	19.3	17.6	18.8	19.4	18.6	18.2	19.7	18.5	19.4	18.8	19.1	19.3	19.3	18.8	18.6	19.6	18.9	19.2	18.6	18.7	19.5	19	19.1	18.8	19.4	18.3	18.6	18.8	19.4	18.7	19.1	19.6	18.7	19.3	19.1	19.1	19.3	19.2	19.3	19.1	18.5	17.9	18.6	18.5
Tsuneonella flava MS1-4	18.9	18.5	19.3	19.8	19.2	19.5	18.8	20.2	19.2	18.6	19	18.9	19.1	21.3	19.5	20.3	21.6	23.3	18.6	18.7	20.3	18.2	19.2	19.5	18.3	18.2	18.5	20	18.7	19.3	19.2	19.3	21.1	18.8	21.2	19.1	22.2	20	18.7	18.9	20.3	19.6	18.9	19.9	19.3	18	17.9	18.7	18
Tsuneonella mangrovi C9-11	19.7	19.8	19.9	18.9	19.2	19.1	18.5	19.1	18.7	19.3	19.1	19.2	18.4	18.7	19.1	19.2	19.8	20.1	19.1	18.6	19.8	19.1	19.8	19.1	18.5	19	18.8	19	19.6	19.7	18.8	19.4	19.1	19.7	18.9	18.7	19.5	18.9	18.8	18.9	19.6	19.1	19.2	19	18.7	18.7	17.6	18.5	18.3
Tsuneonella rigui KCTC 42620	18.8	19.1	19.6	19.3	19.4	19.3	18.8	18.5	19.2	17.9	18.9	18.8	18.8	18.6	19.1	19	19.8	19.6	18.1	18.7	19.5	18.7	19.5	18.5	19.5	18.9	18.9	18.8	19.1	19.1	18.7	18.8	18.7	19.4	18.8	18.8	19.6	18.9	19.4	19	19.2	19.3	19.5	18.9	19.2	18.5	18.2	18.4	18.4
Tsuneonella suprasediminis Ery12	19.1	19	20.1	20	19	19.6	19.2	19.2	19.6	19.3	19.5	18.6	18.4	20.2	19.3	20	21.9	23.1	18.7	18.4	19.9	18.5	19.4	19.6	18.5	19	19.1	19.2	19.1	19.9	18.7	20.1	19.8	19	20.2	19.7	25.9	19.8	18.8	18.9	19	19.1	19.6	19.7	19.7	18.4	18.3	18.8	20.3
Tsuneonella troitsensis JCM 17037	18.5	19.8	19.2	18.9	18.7	19.3	17.9	19.1	18.3	18.2	18.1	18.8	18	19.3	18.8	19.4	18.9	18.4	18.5	18.2	19.5	18.9	18.9	18.8	18.5	18.9	19.1	18.8	18.6	19.2	18	18.3	19	18.6	18.8	18.9	19.4	18.9	19.2	19.2	19.2	20.1	18.9	18.5	18.8	18.4	18.1	18.2	18.1
Zymomonas mobilis ATCC 10988	34.5	28.3	35	26.6	30.2	32.1	39.2	29.5	32.5	27.1	33.1	33.8	33.9	33.1	36.8	25.2	33.9	27.4	39.8	37.4	30.7	18.4	32.6	28.7	28.9	34.6	27.5	20.3	36.8	27.1	27.4	22.3	34.7	36.9	32.2	29.5	31.4	24.6	39.1	36.3	35.4	34.4	30.1	23.1	32.4	32.8	31.6	33.2	33.2
[truncated: 380 more columns]

## Sheet: Table S5
Table S5. AAI values among Sphingomonadales type strain genomes.
	Pedomonas mirosovicensis A1X5R2	Sphingoaurantiacus capsulatus KCTC 42644	Pacificimonas flava JLT2015	Sphingosinicella microcystinivorans DSM 19791	Sphingosinicella soli DSM 17328	Sandaracinobacteroides saxicola M6	Thermaurantiacus tibetensis SYSU G02173	Sandaracinobacteroides sayramensis RS1-74	Sandaracinobacteroides hominis SZY PN-1	Polymorphobacter arshaanensis DJ1R-1	Polymorphobacter megasporae PAMC 29362	Chioneia frigida R-67880	Chioneia hiemis R-36677	Chioneia algoris R-39594	Chioneia brumae R-39161	Glacieibacterium frigidum LB1R16	Polymorphobacter fuscus D40P	Polymorphobacter glacialis CGMCC 1.15519	Polymorphobacter multimanifer JCM 18140	Sandarakinorhabdus cyanobacteriorum TH057	Sandarakinorhabdus rubra MO-4	Sandarakinorhabdus oryzae NM-18	Sandarakinorhabdus limnophila DSM 17366	Sphingosinicella ginsenosidimutans BS-11	Allosphingosinicella indica Dd16	Sphingosinicella humi QZX222	Sphingomonas deserti GL-C-18	Allosphingosinicella vermicomposti KCTC 22446	Sphingosinicella flava KCTC-82357	Sphingomicrobium lutaoense DSM 24194	Sphingomicrobium flavum JCM18555	Sphingomicrobium marinum JCM18554	Sphingomicrobium arenosum NBRC113094	Sphingomicrobium aestuariivivum KCTC 42286	Sphingomicrobium astaxanthinifaciens JCM 18551	Sphingomonas mesophila SYSUP0001	Sphingomonas rhizophila KACC 19189	Sphingomonas edaphi DAC4	Sphingomonas jaspsi DSM 18422	Sphingomonas ginkgonis HMF7854	Sphingomonas arenae SYSUD00720	Sphingomonas ginsengisoli KCTC 12630	Sphingomonas kaistensis DSM 16846	Sphingomonas astaxanthinifaciens DSM 22298	Sphingomonas piscis HDW15B	Sphingomonas daechungensis KACC 18115	Sphingomonas sinipercae HDW15C	Sphingomonas sabuli sand1-3	Sphingomonas lutea KCTC 23642
Pedomonas mirosovicensis A1X5R2		0.57	0.54	0.56	0.56	0.55	0.55	0.55	0.54	0.56	0.54	0.55	0.55	0.55	0.56	0.55	0.55	0.55	0.53	0.54	0.55	0.54	0.55	0.53	0.54	0.54	0.54	0.54	0.55	0.53	0.52	0.52	0.52	0.52	0.52	0.53	0.53	0.53	0.52	0.52	0.53	0.53	0.52	0.53	0.53	0.53	0.53	0.53	0.53
Sphingoaurantiacus capsulatus KCTC 42644	0.57		0.58	0.6	0.6	0.58	0.58	0.58	0.58	0.61	0.59	0.6	0.6	0.61	0.61	0.61	0.6	0.6	0.58	0.58	0.59	0.58	0.6	0.57	0.58	0.59	0.56	0.59	0.59	0.55	0.54	0.54	0.54	0.54	0.55	0.56	0.56	0.56	0.55	0.55	0.56	0.55	0.55	0.56	0.55	0.55	0.56	0.56	0.56
Pacificimonas flava JLT2015	0.54	0.58		0.6	0.6	0.55	0.55	0.55	0.55	0.57	0.55	0.55	0.56	0.56	0.56	0.56	0.56	0.56	0.54	0.55	0.56	0.55	0.56	0.55	0.56	0.56	0.54	0.56	0.56	0.54	0.53	0.54	0.54	0.54	0.54	0.55	0.54	0.54	0.53	0.54	0.54	0.54	0.54	0.54	0.53	0.53	0.54	0.54	0.54
Sphingosinicella microcystinivorans DSM 19791	0.56	0.6	0.6		0.86	0.57	0.57	0.57	0.57	0.59	0.56	0.57	0.58	0.58	0.59	0.58	0.58	0.57	0.56	0.57	0.58	0.57	0.58	0.56	0.58	0.58	0.55	0.58	0.58	0.55	0.54	0.54	0.54	0.54	0.55	0.56	0.56	0.56	0.55	0.54	0.55	0.54	0.54	0.55	0.54	0.55	0.56	0.55	0.56
Sphingosinicella soli DSM 17328	0.56	0.6	0.6	0.86		0.57	0.57	0.57	0.57	0.59	0.57	0.58	0.58	0.58	0.59	0.58	0.58	0.58	0.56	0.56	0.58	0.57	0.57	0.56	0.58	0.57	0.55	0.58	0.57	0.55	0.54	0.54	0.54	0.54	0.55	0.56	0.56	0.56	0.56	0.54	0.56	0.55	0.55	0.56	0.55	0.55	0.56	0.55	0.56
Sandaracinobacteroides saxicola M6	0.55	0.58	0.55	0.57	0.57		0.63	0.62	0.62	0.6	0.58	0.59	0.59	0.59	0.6	0.6	0.59	0.59	0.58	0.59	0.6	0.59	0.59	0.54	0.55	0.55	0.53	0.56	0.56	0.54	0.53	0.53	0.53	0.53	0.54	0.55	0.54	0.55	0.54	0.53	0.54	0.54	0.54	0.55	0.54	0.53	0.55	0.54	0.54
Thermaurantiacus tibetensis SYSU G02173	0.55	0.58	0.55	0.57	0.57	0.63		0.63	0.64	0.59	0.57	0.58	0.59	0.59	0.59	0.59	0.59	0.58	0.58	0.58	0.6	0.58	0.58	0.55	0.55	0.55	0.54	0.55	0.55	0.54	0.53	0.53	0.53	0.53	0.54	0.55	0.54	0.55	0.54	0.54	0.54	0.54	0.54	0.55	0.54	0.54	0.55	0.54	0.54
Sandaracinobacteroides sayramensis RS1-74	0.55	0.58	0.55	0.57	0.57	0.62	0.63		0.72	0.58	0.55	0.57	0.56	0.57	0.57	0.57	0.57	0.57	0.56	0.56	0.57	0.56	0.57	0.54	0.55	0.55	0.53	0.55	0.55	0.54	0.53	0.52	0.52	0.53	0.53	0.54	0.54	0.54	0.53	0.53	0.54	0.54	0.53	0.54	0.53	0.53	0.54	0.53	0.54
Sandaracinobacteroides hominis SZY PN-1	0.54	0.58	0.55	0.57	0.57	0.62	0.64	0.72		0.58	0.56	0.57	0.57	0.58	0.58	0.58	0.58	0.58	0.57	0.57	0.58	0.58	0.58	0.54	0.55	0.54	0.54	0.55	0.55	0.54	0.52	0.52	0.52	0.53	0.53	0.54	0.54	0.54	0.54	0.53	0.54	0.54	0.53	0.54	0.53	0.53	0.54	0.54	0.54
Polymorphobacter arshaanensis DJ1R-1	0.56	0.61	0.57	0.59	0.59	0.6	0.59	0.58	0.58		0.64	0.64	0.64	0.65	0.65	0.65	0.64	0.63	0.61	0.61	0.62	0.61	0.62	0.56	0.56	0.56	0.54	0.57	0.57	0.54	0.53	0.53	0.53	0.53	0.54	0.55	0.55	0.55	0.55	0.55	0.55	0.55	0.54	0.55	0.54	0.54	0.56	0.55	0.55
Polymorphobacter megasporae PAMC 29362	0.54	0.59	0.55	0.56	0.57	0.58	0.57	0.55	0.56	0.64		0.64	0.65	0.65	0.65	0.65	0.63	0.62	0.6	0.59	0.6	0.6	0.6	0.55	0.55	0.55	0.54	0.55	0.55	0.53	0.52	0.52	0.52	0.52	0.53	0.54	0.54	0.54	0.54	0.54	0.53	0.54	0.54	0.54	0.54	0.53	0.54	0.53	0.54
Chioneia frigida R-67880	0.55	0.6	0.55	0.57	0.58	0.59	0.58	0.57	0.57	0.64	0.64		0.72	0.72	0.73	0.72	0.63	0.63	0.61	0.6	0.61	0.6	0.62	0.55	0.56	0.55	0.54	0.56	0.56	0.54	0.53	0.53	0.53	0.53	0.54	0.54	0.55	0.55	0.55	0.54	0.54	0.54	0.54	0.55	0.54	0.54	0.55	0.54	0.54
Chioneia hiemis R-36677	0.55	0.6	0.56	0.58	0.58	0.59	0.59	0.56	0.57	0.64	0.65	0.72		0.88	0.88	0.88	0.64	0.64	0.62	0.6	0.62	0.61	0.62	0.55	0.56	0.56	0.55	0.56	0.56	0.54	0.53	0.53	0.53	0.53	0.54	0.55	0.55	0.55	0.54	0.54	0.54	0.54	0.55	0.55	0.54	0.54	0.55	0.54	0.55
Chioneia algoris R-39594	0.55	0.61	0.56	0.58	0.58	0.59	0.59	0.57	0.58	0.65	0.65	0.72	0.88		0.87	0.88	0.65	0.64	0.63	0.61	0.62	0.61	0.62	0.56	0.57	0.56	0.55	0.57	0.57	0.54	0.54	0.54	0.53	0.53	0.54	0.55	0.55	0.55	0.55	0.55	0.55	0.54	0.55	0.55	0.55	0.54	0.55	0.55	0.55
Chioneia brumae R-39161	0.56	0.61	0.56	0.59	0.59	0.6	0.59	0.57	0.58	0.65	0.65	0.73	0.88	0.87		0.9	0.65	0.64	0.62	0.61	0.63	0.62	0.62	0.56	0.57	0.57	0.55	0.57	0.57	0.55	0.54	0.54	0.54	0.54	0.54	0.55	0.55	0.55	0.55	0.55	0.55	0.55	0.55	0.56	0.55	0.54	0.56	0.55	0.55
Glacieibacterium frigidum LB1R16	0.55	0.61	0.56	0.58	0.58	0.6	0.59	0.57	0.58	0.65	0.65	0.72	0.88	0.88	0.9		0.65	0.64	0.62	0.61	0.62	0.61	0.62	0.56	0.57	0.56	0.55	0.56	0.57	0.54	0.53	0.53	0.53	0.53	0.54	0.55	0.55	0.55	0.54	0.55	0.55	0.55	0.55	0.56	0.55	0.54	0.56	0.54	0.55
Polymorphobacter fuscus D40P	0.55	0.6	0.56	0.58	0.58	0.59	0.59	0.57	0.58	0.64	0.63	0.63	0.64	0.65	0.65	0.65		0.74	0.68	0.66	0.68	0.67	0.68	0.55	0.56	0.56	0.55	0.56	0.56	0.54	0.53	0.53	0.53	0.53	0.53	0.55	0.54	0.55	0.54	0.54	0.54	0.54	0.54	0.55	0.54	0.54	0.55	0.54	0.54
Polymorphobacter glacialis CGMCC 1.15519	0.55	0.6	0.56	0.57	0.58	0.59	0.58	0.57	0.58	0.63	0.62	0.63	0.64	0.64	0.64	0.64	0.74		0.68	0.65	0.66	0.66	0.67	0.55	0.56	0.56	0.55	0.56	0.56	0.54	0.53	0.53	0.53	0.53	0.53	0.54	0.55	0.55	0.54	0.54	0.54	0.54	0.54	0.54	0.54	0.54	0.55	0.54	0.54
Polymorphobacter multimanifer JCM 18140	0.53	0.58	0.54	0.56	0.56	0.58	0.58	0.56	0.57	0.61	0.6	0.61	0.62	0.63	0.62	0.62	0.68	0.68		0.65	0.66	0.65	0.66	0.54	0.55	0.54	0.53	0.55	0.55	0.53	0.52	0.52	0.52	0.52	0.53	0.54	0.54	0.54	0.53	0.53	0.54	0.53	0.53	0.54	0.53	0.52	0.54	0.53	0.54
Sandarakinorhabdus cyanobacteriorum TH057	0.54	0.58	0.55	0.57	0.56	0.59	0.58	0.56	0.57	0.61	0.59	0.6	0.6	0.61	0.61	0.61	0.66	0.65	0.65		0.8	0.81	0.81	0.54	0.55	0.54	0.53	0.55	0.56	0.53	0.53	0.52	0.52	0.53	0.53	0.54	0.54	0.54	0.54	0.53	0.54	0.54	0.53	0.54	0.53	0.53	0.54	0.54	0.54
Sandarakinorhabdus rubra MO-4	0.55	0.59	0.56	0.58	0.58	0.6	0.6	0.57	0.58	0.62	0.6	0.61	0.62	0.62	0.63	0.62	0.68	0.66	0.66	0.8		0.81	0.81	0.55	0.56	0.56	0.54	0.56	0.56	0.54	0.53	0.53	0.53	0.53	0.54	0.55	0.54	0.55	0.55	0.54	0.55	0.54	0.54	0.55	0.54	0.54	0.55	0.54	0.55
Sandarakinorhabdus oryzae NM-18	0.54	0.58	0.55	0.57	0.57	0.59	0.58	0.56	0.58	0.61	0.6	0.6	0.61	0.61	0.62	0.61	0.67	0.66	0.65	0.81	0.81		0.86	0.55	0.55	0.55	0.53	0.56	0.56	0.54	0.53	0.53	0.52	0.53	0.53	0.54	0.54	0.55	0.54	0.54	0.54	0.54	0.54	0.55	0.54	0.53	0.55	0.54	0.54
Sandarakinorhabdus limnophila DSM 17366	0.55	0.6	0.56	0.58	0.57	0.59	0.58	0.57	0.58	0.62	0.6	0.62	0.62	0.62	0.62	0.62	0.68	0.67	0.66	0.81	0.81	0.86		0.55	0.55	0.55	0.54	0.56	0.56	0.54	0.53	0.53	0.53	0.53	0.54	0.54	0.54	0.55	0.55	0.54	0.54	0.54	0.54	0.55	0.54	0.53	0.55	0.54	0.54
Sphingosinicella ginsenosidimutans BS-11	0.53	0.57	0.55	0.56	0.56	0.54	0.55	0.54	0.54	0.56	0.55	0.55	0.55	0.56	0.56	0.56	0.55	0.55	0.54	0.54	0.55	0.55	0.55		0.66	0.67	0.64	0.66	0.66	0.59	0.58	0.58	0.58	0.58	0.59	0.61	0.61	0.61	0.6	0.61	0.61	0.6	0.6	0.61	0.6	0.61	0.61	0.6	0.61
Allosphingosinicella indica Dd16	0.54	0.58	0.56	0.58	0.58	0.55	0.55	0.55	0.55	0.56	0.55	0.56	0.56	0.57	0.57	0.57	0.56	0.56	0.55	0.55	0.56	0.55	0.55	0.66		0.7	0.66	0.68	0.69	0.6	0.59	0.59	0.58	0.59	0.59	0.61	0.61	0.62	0.61	0.61	0.61	0.6	0.6	0.61	0.61	0.61	0.62	0.61	0.61
Sphingosinicella humi QZX222	0.54	0.59	0.56	0.58	0.57	0.55	0.55	0.55	0.54	0.56	0.55	0.55	0.56	0.56	0.57	0.56	0.56	0.56	0.54	0.54	0.56	0.55	0.55	0.67	0.7		0.68	0.7	0.7	0.6	0.59	0.59	0.58	0.59	0.59	0.61	0.61	0.62	0.61	0.61	0.61	0.6	0.6	0.6	0.61	0.61	0.62	0.61	0.61
Sphingomonas deserti GL-C-18	0.54	0.56	0.54	0.55	0.55	0.53	0.54	0.53	0.54	0.54	0.54	0.54	0.55	0.55	0.55	0.55	0.55	0.55	0.53	0.53	0.54	0.53	0.54	0.64	0.66	0.68		0.67	0.67	0.59	0.57	0.57	0.56	0.57	0.57	0.59	0.6	0.6	0.59	0.6	0.6	0.59	0.59	0.6	0.61	0.59	0.6	0.59	0.6
Allosphingosinicella vermicomposti KCTC 22446	0.54	0.59	0.56	0.58	0.58	0.56	0.55	0.55	0.55	0.57	0.55	0.56	0.56	0.57	0.57	0.56	0.56	0.56	0.55	0.55	0.56	0.56	0.56	0.66	0.68	0.7	0.67		0.81	0.6	0.59	0.59	0.58	0.59	0.59	0.61	0.61	0.62	0.61	0.61	0.62	0.6	0.61	0.61	0.61	0.61	0.62	0.61	0.62
Sphingosinicella flava KCTC-82357	0.55	0.59	0.56	0.58	0.57	0.56	0.55	0.55	0.55	0.57	0.55	0.56	0.56	0.57	0.57	0.57	0.56	0.56	0.55	0.56	0.56	0.56	0.56	0.66	0.69	0.7	0.67	0.81		0.61	0.6	0.59	0.59	0.59	0.6	0.62	0.62	0.62	0.62	0.61	0.62	0.61	0.61	0.62	0.62	0.62	0.62	0.62	0.62
Sphingomicrobium lutaoense DSM 24194	0.53	0.55	0.54	0.55	0.55	0.54	0.54	0.54	0.54	0.54	0.53	0.54	0.54	0.54	0.55	0.54	0.54	0.54	0.53	0.53	0.54	0.54	0.54	0.59	0.6	0.6	0.59	0.6	0.61		0.76	0.72	0.68	0.68	0.69	0.65	0.66	0.66	0.66	0.63	0.64	0.63	0.63	0.63	0.63	0.63	0.64	0.63	0.63
Sphingomicrobium flavum JCM18555	0.52	0.54	0.53	0.54	0.54	0.53	0.53	0.53	0.52	0.53	0.52	0.53	0.53	0.54	0.54	0.53	0.53	0.53	0.52	0.53	0.53	0.53	0.53	0.58	0.59	0.59	0.57	0.59	0.6	0.76		0.72	0.67	0.68	0.68	0.64	0.64	0.65	0.65	0.61	0.63	0.61	0.61	0.62	0.62	0.62	0.63	0.62	0.63
Sphingomicrobium marinum JCM18554	0.52	0.54	0.54	0.54	0.54	0.53	0.53	0.52	0.52	0.53	0.52	0.53	0.53	0.54	0.54	0.53	0.53	0.53	0.52	0.52	0.53	0.53	0.53	0.58	0.59	0.59	0.57	0.59	0.59	0.72	0.72		0.67	0.68	0.68	0.63	0.64	0.64	0.64	0.61	0.62	0.61	0.61	0.62	0.61	0.62	0.62	0.62	0.62
Sphingomicrobium arenosum NBRC113094	0.52	0.54	0.54	0.54	0.54	0.53	0.53	0.52	0.52	0.53	0.52	0.53	0.53	0.53	0.54	0.53	0.53	0.53	0.52	0.52	0.53	0.52	0.53	0.58	0.58	0.58	0.56	0.58	0.59	0.68	0.67	0.67		0.84	0.82	0.63	0.62	0.63	0.63	0.6	0.61	0.6	0.6	0.61	0.6	0.61	0.61	0.61	0.61
Sphingomicrobium aestuariivivum KCTC 42286	0.52	0.54	0.54	0.54	0.54	0.53	0.53	0.53	0.53	0.53	0.52	0.53	0.53	0.53	0.54	0.53	0.53	0.53	0.52	0.53	0.53	0.53	0.53	0.58	0.59	0.59	0.57	0.59	0.59	0.68	0.68	0.68	0.84		0.84	0.63	0.63	0.64	0.63	0.61	0.62	0.61	0.61	0.61	0.61	0.61	0.62	0.61	0.62
Sphingomicrobium astaxanthinifaciens JCM 18551	0.52	0.55	0.54	0.55	0.55	0.54	0.54	0.53	0.53	0.54	0.53	0.54	0.54	0.54	0.54	0.54	0.53	0.53	0.53	0.53	0.54	0.53	0.54	0.59	0.59	0.59	0.57	0.59	0.6	0.69	0.68	0.68	0.82	0.84		0.64	0.63	0.64	0.64	0.61	0.62	0.61	0.61	0.62	0.61	0.62	0.62	0.62	0.62
Sphingomonas mesophila SYSUP0001	0.53	0.56	0.55	0.56	0.56	0.55	0.55	0.54	0.54	0.55	0.54	0.54	0.55	0.55	0.55	0.55	0.55	0.54	0.54	0.54	0.55	0.54	0.54	0.61	0.61	0.61	0.59	0.61	0.62	0.65	0.64	0.63	0.63	0.63	0.64		0.69	0.7	0.68	0.66	0.67	0.66	0.65	0.66	0.66	0.66	0.67	0.67	0.67
Sphingomonas rhizophila KACC 19189	0.53	0.56	0.54	0.56	0.56	0.54	0.54	0.54	0.54	0.55	0.54	0.55	0.55	0.55	0.55	0.55	0.54	0.55	0.54	0.54	0.54	0.54	0.54	0.61	0.61	0.61	0.6	0.61	0.62	0.66	0.64	0.64	0.62	0.63	0.63	0.69		0.72	0.71	0.66	0.67	0.66	0.65	0.66	0.65	0.66	0.67	0.66	0.67
Sphingomonas edaphi DAC4	0.53	0.56	0.54	0.56	0.56	0.55	0.55	0.54	0.54	0.55	0.54	0.55	0.55	0.55	0.55	0.55	0.55	0.55	0.54	0.54	0.55	0.55	0.55	0.61	0.62	0.62	0.6	0.62	0.62	0.66	0.65	0.64	0.63	0.64	0.64	0.7	0.72		0.74	0.67	0.68	0.66	0.66	0.66	0.67	0.67	0.68	0.67	0.68
Sphingomonas jaspsi DSM 18422	0.52	0.55	0.53	0.55	0.56	0.54	0.54	0.53	0.54	0.55	0.54	0.55	0.54	0.55	0.55	0.54	0.54	0.54	0.53	0.54	0.55	0.54	0.55	0.6	0.61	0.61	0.59	0.61	0.62	0.66	0.65	0.64	0.63	0.63	0.64	0.68	0.71	0.74		0.66	0.66	0.65	0.65	0.66	0.66	0.66	0.67	0.65	0.66
Sphingomonas ginkgonis HMF7854	0.52	0.55	0.54	0.54	0.54	0.53	0.54	0.53	0.53	0.55	0.54	0.54	0.54	0.55	0.55	0.55	0.54	0.54	0.53	0.53	0.54	0.54	0.54	0.61	0.61	0.61	0.6	0.61	0.61	0.63	0.61	0.61	0.6	0.61	0.61	0.66	0.66	0.67	0.66		0.68	0.67	0.66	0.67	0.66	0.66	0.67	0.65	0.66
Sphingomonas arenae SYSUD00720	0.53	0.56	0.54	0.55	0.56	0.54	0.54	0.54	0.54	0.55	0.53	0.54	0.54	0.55	0.55	0.55	0.54	0.54	0.54	0.54	0.55	0.54	0.54	0.61	0.61	0.61	0.6	0.62	0.62	0.64	0.63	0.62	0.61	0.62	0.62	0.67	0.67	0.68	0.66	0.68		0.71	0.7	0.71	0.67	0.67	0.67	0.66	0.67
Sphingomonas ginsengisoli KCTC 12630	0.53	0.55	0.54	0.54	0.55	0.54	0.54	0.54	0.54	0.55	0.54	0.54	0.54	0.54	0.55	0.55	0.54	0.54	0.53	0.54	0.54	0.54	0.54	0.6	0.6	0.6	0.59	0.6	0.61	0.63	0.61	0.61	0.6	0.61	0.61	0.66	0.66	0.66	0.65	0.67	0.71		0.69	0.71	0.65	0.65	0.66	0.64	0.65
Sphingomonas kaistensis DSM 16846	0.52	0.55	0.54	0.54	0.55	0.54	0.54	0.53	0.53	0.54	0.54	0.54	0.55	0.55	0.55	0.55	0.54	0.54	0.53	0.53	0.54	0.54	0.54	0.6	0.6	0.6	0.59	0.61	0.61	0.63	0.61	0.61	0.6	0.61	0.61	0.65	0.65	0.66	0.65	0.66	0.7	0.69		0.78	0.65	0.64	0.65	0.64	0.65
Sphingomonas astaxanthinifaciens DSM 22298	0.53	0.56	0.54	0.55	0.56	0.55	0.55	0.54	0.54	0.55	0.54	0.55	0.55	0.55	0.56	0.56	0.55	0.54	0.54	0.54	0.55	0.55	0.55	0.61	0.61	0.6	0.6	0.61	0.62	0.63	0.62	0.62	0.61	0.61	0.62	0.66	0.66	0.66	0.66	0.67	0.71	0.71	0.78		0.66	0.65	0.66	0.65	0.66
Sphingomonas piscis HDW15B	0.53	0.55	0.53	0.54	0.55	0.54	0.54	0.53	0.53	0.54	0.54	0.54	0.54	0.55	0.55	0.55	0.54	0.54	0.53	0.53	0.54	0.54	0.54	0.6	0.61	0.61	0.61	0.61	0.62	0.63	0.62	0.61	0.6	0.61	0.61	0.66	0.65	0.67	0.66	0.66	0.67	0.65	0.65	0.66		0.67	0.69	0.66	0.68
Sphingomonas daechungensis KACC 18115	0.53	0.55	0.53	0.55	0.55	0.53	0.54	0.53	0.53	0.54	0.53	0.54	0.54	0.54	0.54	0.54	0.54	0.54	0.52	0.53	0.54	0.53	0.53	0.61	0.61	0.61	0.59	0.61	0.62	0.63	0.62	0.62	0.61	0.61	0.62	0.66	0.66	0.67	0.66	0.66	0.67	0.65	0.64	0.65	0.67		0.7	0.68	0.69
Sphingomonas sinipercae HDW15C	0.53	0.56	0.54	0.56	0.56	0.55	0.55	0.54	0.54	0.56	0.54	0.55	0.55	0.55	0.56	0.56	0.55	0.55	0.54	0.54	0.55	0.55	0.55	0.61	0.62	0.62	0.6	0.62	0.62	0.64	0.63	0.62	0.61	0.62	0.62	0.67	0.67	0.68	0.67	0.67	0.67	0.66	0.65	0.66	0.69	0.7		0.71	0.7
Sphingomonas sabuli sand1-3	0.53	0.56	0.54	0.55	0.55	0.54	0.54	0.53	0.54	0.55	0.53	0.54	0.54	0.55	0.55	0.54	0.54	0.54	0.53	0.54	0.54	0.54	0.54	0.6	0.61	0.61	0.59	0.61	0.62	0.63	0.62	0.62	0.61	0.61	0.62	0.67	0.66	0.67	0.65	0.65	0.66	0.64	0.64	0.65	0.66	0.68	0.71		0.69
Sphingomonas lutea KCTC 23642	0.53	0.56	0.54	0.56	0.56	0.54	0.54	0.54	0.54	0.55	0.54	0.54	0.55	0.55	0.55	0.55	0.54	0.54	0.54	0.54	0.55	0.54	0.54	0.61	0.61	0.61	0.6	0.62	0.62	0.63	0.63	0.62	0.61	0.62	0.62	0.67	0.67	0.68	0.66	0.66	0.67	0.65	0.65	0.66	0.68	0.69	0.7	0.69
Sphingomonas agri LMG 29563	0.52	0.54	0.53	0.54	0.54	0.53	0.53	0.52	0.53	0.53	0.53	0.53	0.53	0.54	0.54	0.54	0.53	0.53	0.52	0.53	0.53	0.53	0.53	0.6	0.6	0.6	0.58	0.6	0.6	0.62	0.61	0.6	0.6	0.6	0.61	0.65	0.65	0.66	0.64	0.65	0.65	0.64	0.63	0.64	0.67	0.68	0.69	0.67	0.71
Sphingomonas segetis YJ09	0.53	0.55	0.53	0.55	0.55	0.53	0.53	0.53	0.53	0.54	0.53	0.53	0.53	0.54	0.54	0.54	0.53	0.54	0.52	0.53	0.54	0.53	0.53	0.6	0.6	0.61	0.59	0.6	0.6	0.63	0.62	0.61	0.6	0.61	0.61	0.65	0.66	0.66	0.65	0.65	0.66	0.64	0.64	0.65	0.67	0.69	0.69	0.68	0.72
Zymomonas mobilis ATCC 10988	0.51	0.53	0.51	0.52	0.52	0.51	0.51	0.51	0.51	0.52	0.52	0.52	0.51	0.52	0.52	0.51	0.52	0.51	0.51	0.51	0.52	0.52	0.52	0.54	0.55	0.55	0.53	0.55	0.55	0.53	0.52	0.52	0.51	0.52	0.52	0.53	0.53	0.53	0.53	0.52	0.52	0.52	0.52	0.53	0.53	0.53	0.53	0.53	0.53
Sphingomonas formosensis CC-Nfb-2	0.54	0.56	0.55	0.56	0.56	0.54	0.55	0.56	0.54	0.56	0.54	0.55	0.54	0.55	0.56	0.55	0.55	0.55	0.53	0.54	0.55	0.54	0.55	0.6	0.61	0.61	0.58	0.62	0.62	0.57	0.56	0.55	0.55	0.55	0.56	0.58	0.58	0.58	0.57	0.57	0.58	0.57	0.57	0.58	0.57	0.57	0.58	0.57	0.57
Sphingomonas laterariae LNB2	0.55	0.58	0.55	0.57	0.57	0.55	0.55	0.56	0.56	0.57	0.54	0.56	0.56	0.56	0.57	0.56	0.56	0.56	0.54	0.55	0.56	0.55	0.56	0.6	0.63	0.63	0.59	0.63	0.63	0.58	0.57	0.56	0.56	0.56	0.57	0.59	0.58	0.59	0.58	0.58	0.58	0.57	0.57	0.58	0.58	0.57	0.59	0.58	0.58
Sphingomonas haloaromaticamans P3	0.55	0.58	0.55	0.57	0.57	0.56	0.56	0.57	0.55	0.56	0.55	0.56	0.56	0.57	0.57	0.56	0.56	0.56	0.55	0.55	0.56	0.55	0.56	0.61	0.62	0.63	0.6	0.63	0.63	0.58	0.57	0.56	0.56	0.56	0.57	0.59	0.59	0.59	0.58	0.58	0.58	0.58	0.58	0.58	0.58	0.57	0.59	0.58	0.59
Sphingomonas fennica K101	0.55	0.58	0.55	0.57	0.58	0.56	0.56	0.56	0.56	0.56	0.56	0.56	0.56	0.57	0.57	0.56	0.57	0.56	0.55	0.55	0.56	0.56	0.56	0.61	0.63	0.63	0.6	0.63	0.63	0.58	0.57	0.57	0.56	0.57	0.57	0.59	0.59	0.6	0.58	0.58	0.59	0.58	0.57	0.59	0.58	0.57	0.6	0.58	0.59
Sphingomonas quercus XMGL2	0.55	0.57	0.55	0.57	0.57	0.55	0.56	0.55	0.55	0.57	0.56	0.56	0.57	0.57	0.57	0.56	0.56	0.56	0.55	0.55	0.56	0.55	0.56	0.61	0.61	0.61	0.6	0.62	0.62	0.58	0.57	0.56	0.56	0.56	0.57	0.59	0.59	0.59	0.58	0.58	0.58	0.58	0.58	0.59	0.58	0.58	0.59	0.58	0.59
Sphingomonas morindae NBD5	0.54	0.57	0.55	0.56	0.56	0.55	0.55	0.55	0.55	0.56	0.55	0.56	0.55	0.56	0.56	0.56	0.56	0.55	0.54	0.55	0.55	0.55	0.55	0.6	0.6	0.6	0.58	0.6	0.6	0.56	0.55	0.55	0.55	0.55	0.56	0.58	0.58	0.57	0.57	0.58	0.57	0.57	0.57	0.58	0.57	0.56	0.58	0.57	0.57
Sphingomonas oligoaromativorans DSM 102246	0.55	0.57	0.55	0.56	0.57	0.55	0.54	0.55	0.55	0.56	0.55	0.56	0.55	0.56	0.56	0.56	0.56	0.56	0.54	0.55	0.55	0.54	0.55	0.6	0.6	0.6	0.59	0.61	0.61	0.57	0.56	0.56	0.55	0.56	0.56	0.58	0.58	0.58	0.58	0.58	0.57	0.57	0.57	0.58	0.57	0.57	0.58	0.57	0.57
Sphingomonas chungangi CGMCC 1.13654	0.53	0.56	0.54	0.55	0.55	0.53	0.54	0.54	0.53	0.55	0.54	0.55	0.54	0.55	0.55	0.55	0.55	0.55	0.53	0.53	0.55	0.54	0.55	0.59	0.6	0.59	0.57	0.6	0.6	0.57	0.56	0.55	0.55	0.55	0.56	0.58	0.57	0.57	0.57	0.57	0.57	0.57	0.56	0.57	0.57	0.56	0.58	0.57	0.57
Sphingomonas montanisoli ZX9611	0.53	0.57	0.54	0.55	0.55	0.54	0.54	0.54	0.54	0.55	0.54	0.55	0.55	0.56	0.56	0.55	0.55	0.55	0.53	0.54	0.55	0.55	0.55	0.58	0.6	0.6	0.58	0.61	0.61	0.56	0.55	0.55	0.55	0.55	0.55	0.57	0.57	0.57	0.57	0.56	0.56	0.56	0.56	0.57	0.57	0.56	0.58	0.56	0.57
Sphingomonas crocodyli CCP-7	0.53	0.57	0.54	0.55	0.55	0.53	0.54	0.54	0.54	0.55	0.54	0.54	0.54	0.55	0.55	0.55	0.55	0.55	0.53	0.54	0.55	0.55	0.55	0.58	0.6	0.6	0.57	0.61	0.61	0.56	0.55	0.55	0.55	0.55	0.56	0.57	0.57	0.58	0.57	0.56	0.56	0.56	0.56	0.57	0.57	0.56	0.58	0.56	0.57
Rhizorhabdus argentea DSM 100912	0.53	0.57	0.54	0.55	0.56	0.55	0.55	0.54	0.54	0.56	0.54	0.55	0.55	0.56	0.56	0.55	0.55	0.55	0.54	0.54	0.55	0.54	0.55	0.59	0.6	0.6	0.58	0.61	0.61	0.56	0.55	0.55	0.55	0.55	0.56	0.57	0.57	0.58	0.57	0.57	0.57	0.56	0.56	0.57	0.57	0.56	0.58	0.56	0.57
Rhizorhabdus dicambivorans Ndbn-20	0.54	0.57	0.54	0.56	0.56	0.55	0.54	0.55	0.55	0.56	0.54	0.55	0.55	0.55	0.55	0.55	0.55	0.55	0.54	0.54	0.56	0.55	0.55	0.59	0.6	0.6	0.58	0.61	0.61	0.56	0.55	0.55	0.55	0.55	0.56	0.57	0.57	0.58	0.57	0.56	0.57	0.56	0.56	0.57	0.57	0.56	0.58	0.57	0.57
Rhizorhabdus phycosphaerae MK52	0.54	0.57	0.54	0.56	0.57	0.55	0.55	0.55	0.55	0.56	0.54	0.56	0.55	0.56	0.56	0.56	0.56	0.55	0.54	0.55	0.56	0.55	0.56	0.59	0.61	0.6	0.58	0.61	0.61	0.57	0.56	0.55	0.55	0.55	0.56	0.57	0.57	0.58	0.57	0.57	0.57	0.57	0.56	0.58	0.57	0.56	0.58	0.57	0.57
Rhizorhabdus histidinilytica UM2	0.54	0.57	0.54	0.57	0.57	0.54	0.54	0.55	0.54	0.56	0.54	0.55	0.55	0.56	0.56	0.55	0.55	0.55	0.54	0.54	0.55	0.55	0.55	0.59	0.6	0.6	0.58	0.61	0.61	0.57	0.55	0.55	0.55	0.55	0.56	0.57	0.57	0.58	0.57	0.57	0.57	0.57	0.56	0.58	0.57	0.56	0.58	0.57	0.57
Rhizorhabdus wittichii RW1	0.53	0.57	0.54	0.57	0.57	0.54	0.54	0.55	0.54	0.56	0.54	0.55	0.55	0.56	0.56	0.55	0.55	0.54	0.54	0.54	0.55	0.54	0.55	0.59	0.6	0.6	0.57	0.61	0.61	0.57	0.55	0.55	0.55	0.56	0.56	0.58	0.57	0.58	0.57	0.56	0.57	0.56	0.56	0.57	0.57	0.57	0.58	0.57	0.57
Sphingomonas solaris R4DWN	0.53	0.57	0.55	0.56	0.56	0.55	0.55	0.55	0.55	0.56	0.56	0.57	0.57	0.57	0.57	0.57	0.56	0.56	0.55	0.55	0.56	0.55	0.56	0.6	0.62	0.61	0.59	0.62	0.62	0.58	0.56	0.56	0.56	0.56	0.57	0.59	0.58	0.59	0.58	0.59	0.58	0.57	0.57	0.58	0.58	0.57	0.59	0.58	0.58
Sphingomonas profundi LMO 1	0.53	0.58	0.55	0.56	0.57	0.55	0.55	0.54	0.55	0.56	0.56	0.56	0.56	0.57	0.57	0.57	0.56	0.56	0.54	0.54	0.56	0.55	0.56	0.61	0.62	0.62	0.59	0.62	0.63	0.58	0.56	0.56	0.56	0.56	0.57	0.58	0.58	0.58	0.58	0.58	0.58	0.58	0.57	0.58	0.58	0.57	0.59	0.58	0.58
Sphingomonas oleivorans FW-11	0.55	0.58	0.55	0.58	0.57	0.56	0.56	0.55	0.55	0.57	0.55	0.56	0.57	0.57	0.57	0.57	0.57	0.56	0.55	0.55	0.57	0.56	0.56	0.61	0.62	0.62	0.6	0.63	0.63	0.58	0.57	0.56	0.56	0.56	0.57	0.59	0.58	0.59	0.58	0.58	0.58	0.58	0.57	0.58	0.58	0.57	0.59	0.58	0.58
Sphingomonas naphthae KACC 18716	0.54	0.57	0.54	0.55	0.56	0.54	0.54	0.55	0.54	0.55	0.54	0.55	0.55	0.56	0.56	0.56	0.56	0.55	0.54	0.54	0.55	0.54	0.55	0.59	0.6	0.6	0.58	0.61	0.61	0.57	0.55	0.55	0.55	0.55	0.56	0.58	0.58	0.58	0.57	0.57	0.57	0.57	0.56	0.58	0.57	0.56	0.58	0.57	0.57
Sphingomonas crusticola MIMD3	0.54	0.57	0.55	0.56	0.56	0.55	0.55	0.54	0.55	0.56	0.56	0.56	0.56	0.56	0.57	0.56	0.57	0.56	0.55	0.54	0.55	0.55	0.55	0.6	0.6	0.6	0.59	0.6	0.61	0.57	0.55	0.55	0.55	0.55	0.56	0.57	0.58	0.58	0.57	0.58	0.58	0.57	0.57	0.58	0.58	0.57	0.58	0.57	0.58
Sphingomonas vulcanisoli CECT 8804	0.52	0.56	0.54	0.55	0.56	0.55	0.55	0.54	0.54	0.56	0.56	0.55	0.55	0.56	0.56	0.56	0.56	0.55	0.54	0.54	0.56	0.55	0.55	0.58	0.59	0.59	0.57	0.6	0.6	0.56	0.55	0.55	0.55	0.55	0.55	0.57	0.57	0.57	0.57	0.57	0.57	0.56	0.56	0.57	0.57	0.56	0.58	0.57	0.57
Sphingomonas jatrophae S5-249	0.54	0.58	0.55	0.56	0.56	0.55	0.55	0.55	0.55	0.56	0.56	0.56	0.56	0.56	0.57	0.56	0.57	0.56	0.54	0.55	0.56	0.55	0.56	0.61	0.61	0.61	0.59	0.61	0.62	0.57	0.56	0.56	0.56	0.56	0.57	0.59	0.58	0.59	0.58	0.59	0.58	0.58	0.58	0.58	0.58	0.57	0.59	0.58	0.58
Sphingomonas montana W16RD	0.54	0.57	0.55	0.56	0.56	0.55	0.55	0.54	0.55	0.56	0.56	0.56	0.57	0.57	0.57	0.57	0.57	0.57	0.54	0.54	0.56	0.55	0.56	0.6	0.61	0.61	0.59	0.61	0.61	0.57	0.56	0.56	0.56	0.56	0.56	0.58	0.58	0.58	0.57	0.58	0.57	0.57	0.57	0.58	0.57	0.57	0.58	0.57	0.58
Sphingomonas arantia CGMCC 1.12702	0.54	0.57	0.55	0.56	0.56	0.55	0.55	0.55	0.55	0.56	0.57	0.56	0.56	0.57	0.57	0.57	0.57	0.57	0.55	0.54	0.55	0.55	0.56	0.6	0.61	0.6	0.59	0.61	0.61	0.57	0.56	0.55	0.56	0.56	0.56	0.58	0.58	0.58	0.57	0.58	0.57	0.57	0.57	0.58	0.58	0.57	0.58	0.57	0.58
Sphingomonas prati W18RD	0.53	0.57	0.55	0.56	0.56	0.55	0.55	0.55	0.55	0.56	0.56	0.56	0.56	0.57	0.57	0.57	0.57	0.56	0.55	0.54	0.55	0.55	0.56	0.6	0.61	0.6	0.59	0.61	0.61	0.57	0.56	0.56	0.55	0.56	0.56	0.58	0.58	0.58	0.57	0.58	0.58	0.57	0.57	0.58	0.58	0.57	0.58	0.57	0.58
Sphingomonas cavernae K2R01-6	0.54	0.58	0.56	0.57	0.57	0.55	0.55	0.55	0.55	0.56	0.55	0.55	0.56	0.57	0.57	0.56	0.56	0.56	0.55	0.55	0.56	0.55	0.56	0.61	0.62	0.63	0.6	0.63	0.63	0.58	0.57	0.57	0.56	0.57	0.57	0.59	0.58	0.59	0.58	0.58	0.59	0.57	0.57	0.58	0.58	0.58	0.59	0.58	0.59
Sphingobium boeckii DSM 25079	0.53	0.57	0.55	0.56	0.56	0.54	0.54	0.54	0.55	0.56	0.54	0.55	0.55	0.56	0.56	0.56	0.56	0.56	0.54	0.54	0.55	0.55	0.55	0.6	0.62	0.62	0.59	0.62	0.62	0.58	0.56	0.56	0.56	0.56	0.57	0.58	0.58	0.59	0.58	0.57	0.58	0.57	0.57	0.58	0.57	0.57	0.59	0.58	0.58
Sphingomonas colocasiae JCM-31229	0.54	0.58	0.55	0.58	0.57	0.54	0.54	0.55	0.55	0.56	0.54	0.55	0.55	0.56	0.56	0.55	0.55	0.55	0.54	0.54	0.55	0.54	0.55	0.6	0.62	0.62	0.59	0.62	0.62	0.58	0.56	0.56	0.56	0.56	0.57	0.59	0.59	0.59	0.58	0.57	0.58	0.57	0.57	0.58	0.57	0.57	0.59	0.58	0.58
Sphingomonas sanxanigenens NX02	0.54	0.57	0.54	0.55	0.56	0.54	0.55	0.55	0.56	0.55	0.54	0.55	0.56	0.56	0.56	0.56	0.56	0.56	0.54	0.54	0.55	0.54	0.55	0.6	0.61	0.6	0.59	0.61	0.61	0.57	0.55	0.55	0.55	0.55	0.56	0.57	0.57	0.58	0.57	0.57	0.57	0.57	0.57	0.58	0.57	0.56	0.58	0.57	0.57
Sphingomonas zeicaulis DSM 100587 ga0373354 contigs	0.54	0.57	0.55	0.55	0.56	0.54	0.54	0.54	0.55	0.55	0.55	0.54	0.55	0.56	0.56	0.56	0.56	0.55	0.54	0.54	0.55	0.54	0.55	0.6	0.61	0.61	0.59	0.61	0.61	0.57	0.55	0.55	0.55	0.55	0.56	0.58	0.57	0.58	0.57	0.58	0.57	0.56	0.57	0.58	0.58	0.56	0.58	0.57	0.57
Sphingomonas flavalba ZLT-5	0.55	0.58	0.56	0.58	0.58	0.56	0.56	0.56	0.56	0.57	0.56	0.57	0.56	0.57	0.57	0.57	0.57	0.57	0.55	0.56	0.57	0.56	0.57	0.62	0.63	0.63	0.6	0.63	0.63	0.58	0.57	0.57	0.57	0.57	0.58	0.6	0.59	0.6	0.59	0.58	0.59	0.59	0.58	0.59	0.59	0.59	0.6	0.59	0.59
Sphingomonas changbaiensis NBRC 104936	0.54	0.58	0.55	0.57	0.57	0.56	0.56	0.55	0.55	0.57	0.56	0.56	0.56	0.57	0.57	0.57	0.56	0.56	0.55	0.56	0.56	0.56	0.56	0.62	0.62	0.62	0.6	0.62	0.63	0.58	0.57	0.57	0.56	0.56	0.57	0.59	0.59	0.59	0.59	0.59	0.59	0.59	0.58	0.59	0.59	0.59	0.6	0.59	0.59
Sphingomonas jejuensis DSM 27651	0.53	0.57	0.55	0.56	0.57	0.55	0.55	0.55	0.54	0.56	0.55	0.56	0.56	0.56	0.57	0.56	0.56	0.56	0.54	0.55	0.56	0.55	0.55	0.6	0.61	0.61	0.59	0.61	0.61	0.58	0.56	0.56	0.56	0.56	0.57	0.59	0.58	0.58	0.58	0.58	0.58	0.58	0.57	0.59	0.58	0.58	0.59	0.58	0.58
Sphingomonas gilva ZDH117	0.54	0.57	0.56	0.57	0.57	0.55	0.55	0.55	0.55	0.56	0.55	0.56	0.56	0.56	0.57	0.56	0.56	0.56	0.54	0.55	0.56	0.55	0.56	0.61	0.62	0.62	0.6	0.62	0.62	0.58	0.57	0.57	0.57	0.57	0.57	0.59	0.59	0.59	0.58	0.59	0.59	0.58	0.58	0.59	0.59	0.58	0.6	0.59	0.59
Sphingomonas cannabina DM2-R-LB4	0.55	0.57	0.56	0.56	0.57	0.55	0.55	0.55	0.55	0.56	0.55	0.56	0.55	0.56	0.56	0.55	0.56	0.55	0.54	0.54	0.55	0.54	0.55	0.6	0.6	0.6	0.6	0.61	0.61	0.57	0.56	0.56	0.56	0.56	0.57	0.59	0.59	0.59	0.58	0.58	0.58	0.58	0.57	0.58	0.58	0.58	0.59	0.58	0.58
Sphingomonas floccifaciens CGMCC 1.15797	0.53	0.56	0.55	0.55	0.55	0.54	0.54	0.54	0.54	0.55	0.55	0.55	0.55	0.55	0.56	0.56	0.56	0.55	0.54	0.54	0.55	0.54	0.55	0.59	0.6	0.59	0.58	0.6	0.6	0.57	0.56	0.56	0.55	0.56	0.56	0.58	0.58	0.58	0.57	0.58	0.57	0.57	0.58	0.58	0.58	0.56	0.58	0.57	0.58
Sphingomonas guangdongensis CGMCC 1.12672	0.53	0.56	0.55	0.55	0.56	0.55	0.55	0.55	0.54	0.55	0.55	0.55	0.55	0.55	0.56	0.56	0.56	0.55	0.54	0.54	0.55	0.54	0.55	0.59	0.6	0.6	0.58	0.6	0.6	0.57	0.56	0.55	0.55	0.56	0.56	0.58	0.58	0.58	0.57	0.58	0.58	0.57	0.58	0.58	0.58	0.57	0.58	0.57	0.57
Sphingomonas desiccabilis CP1D	0.54	0.57	0.55	0.56	0.57	0.55	0.55	0.55	0.55	0.55	0.55	0.55	0.56	0.56	0.57	0.56	0.57	0.56	0.55	0.55	0.56	0.55	0.56	0.6	0.61	0.6	0.6	0.61	0.61	0.57	0.56	0.56	0.55	0.56	0.57	0.58	0.58	0.59	0.58	0.58	0.58	0.58	0.58	0.59	0.58	0.57	0.59	0.58	0.58
Sphingomonas hankookensis KCTC 22579	0.53	0.56	0.54	0.55	0.55	0.54	0.54	0.54	0.54	0.55	0.54	0.55	0.55	0.55	0.56	0.55	0.56	0.55	0.54	0.54	0.55	0.54	0.55	0.58	0.59	0.59	0.58	0.59	0.6	0.57	0.55	0.56	0.55	0.55	0.56	0.58	0.57	0.58	0.57	0.57	0.57	0.57	0.57	0.57	0.57	0.57	0.58	0.57	0.57
Sphingomonas panni DSM 15761	0.53	0.56	0.54	0.55	0.55	0.55	0.54	0.54	0.54	0.55	0.55	0.55	0.55	0.55	0.56	0.55	0.56	0.55	0.54	0.54	0.55	0.54	0.55	0.58	0.59	0.59	0.58	0.59	0.6	0.57	0.55	0.56	0.55	0.55	0.56	0.57	0.57	0.57	0.57	0.57	0.57	0.57	0.57	0.57	0.57	0.56	0.57	0.57	0.57
Sphingomonas aestuarii DSM 19475	0.53	0.57	0.55	0.56	0.56	0.55	0.54	0.55	0.56	0.56	0.54	0.55	0.56	0.56	0.56	0.56	0.56	0.56	0.54	0.55	0.56	0.55	0.56	0.6	0.61	0.61	0.58	0.61	0.61	0.58	0.57	0.57	0.56	0.57	0.57	0.59	0.58	0.58	0.58	0.57	0.58	0.57	0.57	0.58	0.58	0.57	0.59	0.58	0.58
Sphingomonas japonica KC 7	0.54	0.57	0.55	0.56	0.57	0.56	0.55	0.54	0.55	0.57	0.56	0.56	0.56	0.57	0.57	0.57	0.57	0.56	0.55	0.55	0.56	0.56	0.56	0.6	0.61	0.61	0.59	0.61	0.61	0.58	0.57	0.57	0.56	0.57	0.57	0.59	0.59	0.59	0.58	0.58	0.59	0.58	0.58	0.59	0.58	0.58	0.59	0.58	0.58
Sphingomonas baiyangensis L-1-4	0.53	0.57	0.56	0.56	0.56	0.56	0.55	0.55	0.55	0.56	0.55	0.56	0.56	0.57	0.57	0.57	0.57	0.56	0.55	0.55	0.56	0.55	0.56	0.6	0.61	0.61	0.59	0.61	0.61	0.58	0.56	0.57	0.56	0.57	0.57	0.59	0.58	0.59	0.58	0.58	0.58	0.58	0.58	0.59	0.58	0.57	0.59	0.58	0.58
Sphingomonas spermidinifaciens 9NM-10	0.53	0.57	0.55	0.56	0.57	0.55	0.55	0.54	0.55	0.56	0.55	0.56	0.57	0.56	0.57	0.56	0.56	0.56	0.55	0.55	0.56	0.55	0.56	0.6	0.6	0.6	0.59	0.6	0.61	0.58	0.56	0.56	0.56	0.56	0.57	0.58	0.58	0.58	0.58	0.58	0.58	0.57	0.58	0.58	0.58	0.57	0.59	0.58	0.58
Sphingomonas yantingensis DSM 27244	0.53	0.57	0.55	0.56	0.56	0.55	0.54	0.54	0.54	0.56	0.56	0.56	0.56	0.56	0.56	0.56	0.56	0.55	0.54	0.54	0.56	0.55	0.56	0.59	0.6	0.6	0.59	0.6	0.61	0.57	0.56	0.56	0.56	0.56	0.57	0.58	0.58	0.58	0.58	0.58	0.58	0.57	0.58	0.58	0.58	0.57	0.59	0.57	0.58
Sphingosinithalassobacter tenebrarum zrk23	0.53	0.55	0.55	0.55	0.55	0.54	0.54	0.54	0.54	0.54	0.53	0.54	0.54	0.55	0.55	0.54	0.54	0.54	0.53	0.53	0.54	0.54	0.54	0.59	0.59	0.59	0.57	0.59	0.6	0.57	0.56	0.56	0.55	0.56	0.57	0.57	0.57	0.57	0.57	0.56	0.57	0.56	0.56	0.57	0.56	0.56	0.58	0.57	0.57
Sphingosinithalassobacter portus FM6	0.53	0.56	0.55	0.55	0.55	0.54	0.54	0.54	0.54	0.55	0.54	0.54	0.54	0.55	0.55	0.55	0.55	0.55	0.53	0.53	0.55	0.54	0.54	0.59	0.6	0.6	0.57	0.6	0.6	0.57	0.56	0.56	0.56	0.56	0.57	0.58	0.57	0.58	0.57	0.57	0.57	0.56	0.56	0.57	0.57	0.56	0.58	0.57	0.57
Stakelama sediminis DSM 27203	0.53	0.56	0.54	0.56	0.56	0.54	0.54	0.55	0.54	0.55	0.54	0.55	0.55	0.55	0.55	0.55	0.55	0.55	0.54	0.54	0.55	0.54	0.55	0.59	0.6	0.59	0.58	0.6	0.6	0.57	0.56	0.56	0.56	0.56	0.57	0.58	0.57	0.58	0.57	0.57	0.57	0.57	0.56	0.57	0.57	0.57	0.58	0.58	0.57
Stakelama flava CBK3Z-3	0.53	0.56	0.55	0.55	0.56	0.54	0.54	0.54	0.54	0.55	0.54	0.54	0.55	0.55	0.55	0.55	0.55	0.54	0.53	0.53	0.55	0.54	0.55	0.59	0.59	0.6	0.58	0.6	0.6	0.57	0.56	0.56	0.56	0.56	0.57	0.58	0.58	0.58	0.57	0.57	0.57	0.56	0.57	0.57	0.57	0.57	0.58	0.57	0.57
Stakelama pacifica DSM 25059	0.53	0.55	0.55	0.55	0.56	0.54	0.54	0.54	0.54	0.55	0.54	0.55	0.55	0.55	0.55	0.54	0.55	0.54	0.53	0.54	0.54	0.53	0.55	0.59	0.6	0.59	0.58	0.6	0.6	0.57	0.56	0.56	0.55	0.56	0.56	0.57	0.57	0.58	0.57	0.57	0.57	0.57	0.56	0.57	0.57	0.56	0.58	0.57	0.57
Sphingomonas turrisvirgatae MCT13	0.53	0.56	0.55	0.56	0.56	0.55	0.54	0.54	0.55	0.55	0.54	0.55	0.55	0.55	0.56	0.55	0.55	0.55	0.54	0.54	0.55	0.54	0.55	0.59	0.6	0.6	0.58	0.61	0.61	0.57	0.56	0.56	0.55	0.56	0.56	0.58	0.58	0.58	0.57	0.57	0.57	0.57	0.57	0.57	0.58	0.57	0.58	0.57	0.57
Sphingomonas suaedae XS-10	0.53	0.56	0.55	0.56	0.56	0.54	0.54	0.55	0.55	0.55	0.54	0.54	0.55	0.55	0.56	0.55	0.55	0.55	0.54	0.54	0.55	0.54	0.55	0.59	0.6	0.6	0.58	0.61	0.61	0.58	0.56	0.56	0.56	0.56	0.57	0.57	0.58	0.58	0.57	0.57	0.58	0.57	0.58	0.58	0.58	0.57	0.58	0.58	0.58
Sphingomonas koreensis KCTC 2882	0.53	0.57	0.55	0.56	0.57	0.54	0.54	0.55	0.55	0.55	0.54	0.55	0.55	0.55	0.55	0.55	0.56	0.55	0.54	0.54	0.55	0.54	0.55	0.59	0.6	0.6	0.58	0.61	0.61	0.58	0.56	0.56	0.55	0.56	0.56	0.58	0.58	0.58	0.57	0.57	0.57	0.57	0.57	0.58	0.57	0.57	0.58	0.58	0.58
Sphingomonas canadensis DSM 29393	0.53	0.56	0.54	0.56	0.56	0.54	0.54	0.54	0.54	0.55	0.54	0.54	0.55	0.55	0.55	0.55	0.55	0.55	0.54	0.54	0.55	0.55	0.55	0.59	0.6	0.6	0.58	0.6	0.6	0.57	0.56	0.56	0.55	0.56	0.57	0.58	0.58	0.58	0.57	0.57	0.57	0.57	0.57	0.57	0.57	0.57	0.58	0.57	0.58
Sphingomonas pokkalii L3B27	0.53	0.56	0.54	0.55	0.55	0.54	0.54	0.54	0.54	0.55	0.54	0.54	0.55	0.55	0.56	0.55	0.55	0.55	0.54	0.54	0.55	0.54	0.55	0.59	0.59	0.59	0.58	0.6	0.6	0.57	0.56	0.56	0.55	0.56	0.56	0.58	0.58	0.58	0.57	0.57	0.58	0.57	0.57	0.58	0.57	0.56	0.58	0.57	0.57
Sphingomonas pituitosa NBRC 102491	0.53	0.56	0.55	0.55	0.55	0.54	0.54	0.53	0.54	0.55	0.54	0.55	0.55	0.55	0.55	0.55	0.55	0.55	0.54	0.53	0.55	0.54	0.55	0.59	0.59	0.59	0.59	0.6	0.6	0.57	0.55	0.55	0.55	0.56	0.56	0.58	0.58	0.58	0.57	0.58	0.57	0.57	0.57	0.58	0.58	0.56	0.58	0.57	0.57
Sphingomonas trueperi DSM 7225	0.54	0.56	0.54	0.55	0.56	0.55	0.54	0.54	0.54	0.55	0.54	0.55	0.55	0.55	0.55	0.55	0.55	0.55	0.53	0.54	0.55	0.54	0.55	0.59	0.59	0.59	0.59	0.6	0.6	0.57	0.56	0.56	0.55	0.56	0.56	0.57	0.57	0.58	0.57	0.58	0.57	0.57	0.57	0.57	0.58	0.56	0.58	0.57	0.57
Sphingomonas azotifigens NBRC 15497	0.53	0.55	0.54	0.55	0.55	0.54	0.54	0.54	0.54	0.54	0.54	0.54	0.55	0.55	0.55	0.55	0.55	0.55	0.53	0.53	0.55	0.54	0.55	0.59	0.59	0.59	0.59	0.6	0.6	0.57	0.55	0.55	0.55	0.55	0.56	0.57	0.58	0.58	0.57	0.58	0.57	0.57	0.56	0.58	0.58	0.56	0.58	0.57	0.57
Sphingomonas soli NBRC 100801	0.53	0.56	0.55	0.55	0.56	0.54	0.54	0.54	0.54	0.55	0.54	0.55	0.55	0.55	0.56	0.55	0.55	0.55	0.53	0.54	0.55	0.54	0.55	0.6	0.6	0.6	0.58	0.6	0.61	0.57	0.56	0.56	0.56	0.56	0.57	0.58	0.58	0.58	0.57	0.57	0.57	0.57	0.57	0.58	0.58	0.57	0.58	0.58	0.57
Sphingomonas kyeonggiensis DSM 101806	0.53	0.56	0.54	0.55	0.55	0.53	0.53	0.54	0.54	0.55	0.53	0.54	0.54	0.55	0.55	0.54	0.55	0.54	0.53	0.53	0.54	0.53	0.54	0.59	0.59	0.59	0.58	0.6	0.6	0.56	0.55	0.55	0.54	0.55	0.55	0.57	0.57	0.57	0.56	0.57	0.57	0.56	0.56	0.57	0.57	0.56	0.58	0.56	0.57
Sphingomonas leidyi DSM 4733	0.53	0.56	0.54	0.55	0.55	0.54	0.54	0.54	0.54	0.55	0.54	0.55	0.55	0.55	0.55	0.54	0.54	0.55	0.53	0.53	0.55	0.54	0.54	0.6	0.59	0.59	0.58	0.6	0.6	0.57	0.55	0.55	0.55	0.55	0.56	0.57	0.58	0.57	0.57	0.57	0.57	0.57	0.56	0.57	0.57	0.57	0.58	0.57	0.57
Sphingomonas hengshuiensis WHSC-8	0.53	0.56	0.55	0.55	0.56	0.54	0.54	0.53	0.54	0.55	0.54	0.55	0.55	0.55	0.56	0.56	0.56	0.55	0.54	0.54	0.55	0.54	0.55	0.59	0.6	0.59	0.58	0.6	0.6	0.57	0.55	0.55	0.55	0.55	0.56	0.57	0.57	0.58	0.57	0.57	0.57	0.56	0.57	0.57	0.57	0.56	0.58	0.57	0.57
Sphingomonas xinjiangensis DSM 26736	0.53	0.56	0.54	0.55	0.54	0.54	0.53	0.53	0.54	0.55	0.54	0.54	0.55	0.55	0.55	0.55	0.55	0.55	0.53	0.53	0.54	0.54	0.55	0.59	0.59	0.59	0.6	0.6	0.6	0.57	0.56	0.55	0.55	0.55	0.56	0.57	0.57	0.58	0.57	0.57	0.57	0.57	0.56	0.58	0.58	0.56	0.58	0.57	0.57
Sphingomonas naasensis DSM 100060	0.54	0.56	0.55	0.55	0.55	0.54	0.54	0.54	0.54	0.55	0.54	0.55	0.55	0.56	0.55	0.55	0.55	0.55	0.54	0.53	0.55	0.54	0.55	0.6	0.6	0.6	0.59	0.61	0.61	0.57	0.56	0.56	0.55	0.56	0.56	0.58	0.58	0.58	0.57	0.57	0.58	0.57	0.57	0.58	0.58	0.57	0.58	0.57	0.58
Sphingomonas psychrotolerans Cra20	0.53	0.56	0.55	0.55	0.55	0.53	0.54	0.54	0.54	0.55	0.54	0.54	0.55	0.56	0.56	0.55	0.55	0.55	0.53	0.53	0.54	0.54	0.55	0.59	0.6	0.59	0.59	0.6	0.6	0.57	0.56	0.56	0.55	0.55	0.56	0.57	0.58	0.58	0.57	0.57	0.58	0.57	0.57	0.57	0.58	0.57	0.58	0.57	0.57
Sphingomonas gei ZFGT-11	0.53	0.56	0.55	0.55	0.56	0.54	0.53	0.54	0.54	0.55	0.54	0.55	0.55	0.55	0.55	0.55	0.56	0.55	0.53	0.53	0.55	0.54	0.54	0.59	0.6	0.6	0.6	0.6	0.61	0.57	0.55	0.55	0.55	0.55	0.56	0.57	0.58	0.58	0.57	0.57	0.57	0.57	0.56	0.57	0.58	0.57	0.58	0.57	0.58
Hephaestia caeni DSM 25527	0.54	0.56	0.55	0.56	0.56	0.55	0.54	0.57	0.55	0.55	0.54	0.55	0.55	0.55	0.56	0.55	0.55	0.55	0.53	0.54	0.55	0.54	0.54	0.6	0.6	0.6	0.58	0.6	0.6	0.58	0.56	0.56	0.56	0.56	0.56	0.58	0.58	0.58	0.57	0.57	0.57	0.57	0.56	0.58	0.57	0.57	0.58	0.57	0.57
Hephaestia mangrovi CMS5P-6	0.5343	0.5604	0.55	0.563	0.5617	0.5451	0.5437	0.5415	0.5453	0.5566	0.551	0.5512	0.5509	0.554	0.5585	0.552	0.5542	0.551	0.5394	0.5376	0.5493	0.5433	0.548	0.6004	0.6021	0.5974	0.5828	0.6042	0.6039	0.5739	0.5624	0.5615	0.5562	0.5592	0.5637	0.5789	0.5795	0.5828	0.5774	0.5769	0.5734	0.5727	0.5664	0.5752	0.5726	0.5757	0.5825	0.5729	0.5755
Sphingomonas aracearum WZY 27	0.53	0.56	0.55	0.56	0.55	0.54	0.54	0.54	0.54	0.55	0.55	0.55	0.55	0.55	0.56	0.55	0.55	0.55	0.54	0.54	0.55	0.55	0.55	0.59	0.6	0.59	0.58	0.59	0.6	0.57	0.56	0.56	0.55	0.56	0.56	0.58	0.58	0.58	0.57	0.58	0.58	0.57	0.57	0.58	0.57	0.57	0.58	0.57	0.57
Sphingomonas aquatica LMG 28596	0.53	0.56	0.54	0.56	0.56	0.56	0.55	0.54	0.55	0.56	0.55	0.56	0.56	0.56	0.57	0.56	0.56	0.56	0.55	0.56	0.56	0.56	0.56	0.59	0.6	0.6	0.57	0.6	0.6	0.57	0.56	0.56	0.55	0.56	0.57	0.58	0.57	0.58	0.58	0.57	0.57	0.57	0.57	0.58	0.57	0.56	0.58	0.57	0.58
Sphingomonas panacis DCY99	0.53	0.55	0.54	0.55	0.55	0.53	0.54	0.54	0.54	0.55	0.55	0.54	0.54	0.54	0.55	0.55	0.55	0.55	0.53	0.53	0.54	0.54	0.54	0.59	0.59	0.59	0.58	0.59	0.6	0.56	0.55	0.55	0.54	0.55	0.55	0.57	0.57	0.57	0.56	0.57	0.56	0.56	0.56	0.57	0.57	0.56	0.57	0.57	0.57
Sphingomonas populi 3-7	0.52	0.55	0.54	0.55	0.55	0.53	0.54	0.53	0.53	0.54	0.54	0.55	0.54	0.54	0.55	0.55	0.55	0.54	0.53	0.53	0.54	0.53	0.54	0.58	0.59	0.58	0.57	0.59	0.6	0.56	0.55	0.55	0.54	0.55	0.55	0.57	0.57	0.57	0.56	0.57	0.56	0.56	0.56	0.57	0.57	0.56	0.57	0.56	0.57
Sphingomonas psychrolutea CGMCC 1.10106	0.52	0.56	0.54	0.55	0.55	0.54	0.54	0.53	0.54	0.56	0.56	0.56	0.56	0.56	0.56	0.56	0.56	0.55	0.55	0.54	0.56	0.55	0.55	0.59	0.59	0.59	0.57	0.6	0.6	0.57	0.56	0.56	0.55	0.55	0.56	0.57	0.58	0.58	0.57	0.57	0.57	0.57	0.57	0.58	0.57	0.57	0.58	0.56	0.57
Sphingomonas glacialis CGMCC 1.8957	0.53	0.56	0.54	0.55	0.55	0.54	0.54	0.54	0.54	0.56	0.56	0.56	0.55	0.56	0.56	0.56	0.56	0.56	0.55	0.54	0.55	0.55	0.55	0.58	0.59	0.59	0.58	0.59	0.6	0.57	0.55	0.55	0.55	0.55	0.56	0.57	0.57	0.58	0.57	0.58	0.57	0.57	0.57	0.58	0.57	0.56	0.57	0.56	0.57
Sphingomonas echinoides ATCC 14820	0.52	0.56	0.54	0.55	0.55	0.54	0.54	0.53	0.54	0.56	0.55	0.55	0.55	0.56	0.56	0.55	0.56	0.55	0.54	0.54	0.55	0.54	0.55	0.59	0.6	0.59	0.58	0.6	0.6	0.57	0.55	0.55	0.55	0.55	0.56	0.58	0.58	0.58	0.57	0.57	0.57	0.57	0.57	0.58	0.57	0.56	0.58	0.56	0.57
Sphingomonas alpina DSM 22537	0.53	0.57	0.54	0.56	0.55	0.54	0.54	0.54	0.54	0.55	0.54	0.55	0.55	0.56	0.56	0.56	0.55	0.56	0.54	0.53	0.55	0.54	0.55	0.59	0.6	0.6	0.58	0.61	0.6	0.57	0.55	0.55	0.55	0.55	0.56	0.57	0.58	0.58	0.57	0.57	0.57	0.57	0.56	0.57	0.57	0.57	0.58	0.57	0.57
Sphingomonas aliaeris DH-S5	0.52	0.57	0.55	0.55	0.55	0.54	0.54	0.53	0.54	0.56	0.55	0.55	0.56	0.55	0.56	0.55	0.56	0.56	0.54	0.54	0.55	0.54	0.55	0.59	0.6	0.59	0.58	0.6	0.6	0.57	0.55	0.55	0.55	0.55	0.56	0.57	0.58	0.58	0.57	0.57	0.57	0.57	0.57	0.57	0.57	0.56	0.57	0.57	0.57
Sphingomonas qilianensis KCTC 42862	0.53	0.57	0.55	0.56	0.56	0.55	0.55	0.54	0.54	0.57	0.56	0.56	0.57	0.57	0.57	0.57	0.57	0.56	0.55	0.54	0.55	0.55	0.56	0.59	0.6	0.6	0.59	0.6	0.6	0.57	0.56	0.56	0.55	0.56	0.56	0.58	0.58	0.58	0.57	0.58	0.57	0.57	0.57	0.58	0.57	0.57	0.58	0.57	0.58
Sphingomonas hylomeconis KCTC 42739	0.52	0.56	0.54	0.55	0.55	0.54	0.54	0.54	0.54	0.56	0.56	0.56	0.57	0.57	0.57	0.57	0.56	0.56	0.55	0.54	0.55	0.55	0.56	0.59	0.6	0.59	0.58	0.6	0.6	0.57	0.55	0.55	0.55	0.55	0.56	0.58	0.58	0.58	0.57	0.58	0.57	0.58	0.57	0.58	0.57	0.57	0.58	0.57	0.57
Sphingomonas panacisoli HKS19	0.52	0.56	0.54	0.56	0.55	0.54	0.54	0.53	0.54	0.55	0.55	0.55	0.55	0.56	0.56	0.55	0.55	0.55	0.53	0.54	0.55	0.54	0.55	0.59	0.59	0.59	0.57	0.6	0.6	0.57	0.56	0.56	0.55	0.55	0.56	0.58	0.58	0.57	0.57	0.57	0.57	0.57	0.57	0.57	0.57	0.57	0.58	0.57	0.57
Sphingomonas pruni NBRC 15498	0.53	0.56	0.55	0.56	0.55	0.54	0.54	0.54	0.54	0.55	0.55	0.55	0.54	0.55	0.55	0.55	0.55	0.55	0.53	0.54	0.55	0.54	0.55	0.6	0.59	0.59	0.58	0.6	0.6	0.57	0.55	0.55	0.55	0.55	0.56	0.57	0.58	0.58	0.57	0.57	0.57	0.57	0.56	0.57	0.57	0.56	0.57	0.57	0.57
Sphingomonas mali NBRC 15500	0.53	0.56	0.54	0.55	0.55	0.53	0.53	0.53	0.53	0.55	0.54	0.54	0.54	0.55	0.55	0.55	0.55	0.55	0.53	0.53	0.54	0.54	0.55	0.59	0.59	0.59	0.57	0.6	0.6	0.57	0.55	0.55	0.55	0.55	0.56	0.57	0.58	0.57	0.57	0.57	0.57	0.56	0.57	0.57	0.57	0.56	0.57	0.56	0.57
Sphingomonas asaccharolytica NBRC 15499	0.53	0.56	0.54	0.55	0.55	0.53	0.53	0.53	0.53	0.55	0.54	0.54	0.54	0.55	0.55	0.55	0.55	0.54	0.53	0.53	0.54	0.54	0.54	0.59	0.59	0.59	0.58	0.59	0.6	0.57	0.55	0.55	0.55	0.55	0.56	0.57	0.57	0.58	0.57	0.57	0.57	0.57	0.57	0.57	0.57	0.56	0.57	0.57	0.57
Sphingomonas radiodurans S9-5	0.52	0.56	0.54	0.55	0.55	0.55	0.55	0.54	0.54	0.57	0.55	0.55	0.56	0.56	0.57	0.56	0.56	0.56	0.55	0.55	0.55	0.55	0.56	0.59	0.6	0.59	0.58	0.6	0.6	0.57	0.56	0.55	0.55	0.56	0.56	0.58	0.57	0.58	0.57	0.58	0.57	0.57	0.57	0.58	0.57	0.56	0.58	0.57	0.57
Sphingomonas jeddahensis G39	0.53	0.57	0.55	0.56	0.56	0.55	0.55	0.55	0.54	0.56	0.55	0.55	0.56	0.56	0.56	0.56	0.56	0.56	0.55	0.55	0.56	0.55	0.56	0.6	0.61	0.6	0.59	0.61	0.61	0.57	0.56	0.56	0.56	0.56	0.57	0.58	0.59	0.58	0.58	0.58	0.58	0.58	0.57	0.58	0.58	0.57	0.59	0.58	0.58
Sphingomonas olei NM83	0.53	0.57	0.55	0.56	0.56	0.55	0.54	0.55	0.55	0.56	0.55	0.55	0.55	0.56	0.56	0.56	0.56	0.56	0.55	0.55	0.55	0.55	0.56	0.59	0.6	0.6	0.58	0.61	0.61	0.57	0.56	0.56	0.56	0.56	0.56	0.58	0.58	0.58	0.57	0.58	0.58	0.58	0.57	0.58	0.57	0.57	0.58	0.57	0.58
Sphingomonas mucosissima DSM 17494	0.53	0.56	0.55	0.56	0.56	0.54	0.54	0.54	0.54	0.56	0.55	0.55	0.55	0.56	0.56	0.56	0.56	0.56	0.54	0.54	0.55	0.55	0.55	0.59	0.6	0.59	0.59	0.6	0.6	0.57	0.56	0.56	0.55	0.55	0.56	0.58	0.58	0.58	0.57	0.57	0.58	0.57	0.57	0.58	0.57	0.56	0.58	0.57	0.57
Sphingomonas dokdonensis DSM 21029	0.52	0.56	0.55	0.56	0.56	0.54	0.54	0.54	0.54	0.56	0.54	0.55	0.55	0.56	0.56	0.55	0.56	0.56	0.54	0.54	0.55	0.54	0.55	0.59	0.6	0.59	0.58	0.6	0.6	0.57	0.56	0.56	0.55	0.56	0.56	0.58	0.58	0.58	0.57	0.58	0.57	0.57	0.57	0.58	0.57	0.56	0.58	0.57	0.57
Sphingomonas corticis 36D10-4-7	0.53	0.56	0.55	0.56	0.56	0.54	0.55	0.54	0.54	0.56	0.55	0.55	0.56	0.56	0.56	0.56	0.56	0.55	0.54	0.54	0.55	0.55	0.55	0.59	0.6	0.59	0.58	0.6	0.6	0.57	0.56	0.56	0.55	0.56	0.56	0.58	0.58	0.58	0.57	0.58	0.58	0.57	0.57	0.58	0.58	0.57	0.58	0.57	0.57
Sphingomonas palmae JS21-1	0.52	0.56	0.55	0.55	0.55	0.55	0.55	0.54	0.54	0.56	0.55	0.55	0.55	0.55	0.56	0.56	0.56	0.55	0.54	0.54	0.55	0.55	0.55	0.59	0.6	0.59	0.58	0.6	0.6	0.57	0.55	0.56	0.55	0.55	0.56	0.58	0.58	0.58	0.57	0.59	0.58	0.57	0.57	0.58	0.57	0.57	0.58	0.57	0.57
Sphingomonas hominis HHU CXW	0.52	0.57	0.55	0.55	0.55	0.54	0.54	0.54	0.54	0.56	0.55	0.55	0.55	0.55	0.56	0.55	0.56	0.56	0.54	0.54	0.55	0.55	0.55	0.59	0.6	0.59	0.58	0.59	0.6	0.56	0.55	0.55	0.55	0.55	0.56	0.57	0.57	0.58	0.57	0.58	0.57	0.57	0.56	0.57	0.57	0.56	0.58	0.57	0.57
Sphingomonas citricola RHCKR47	0.52	0.56	0.55	0.55	0.55	0.55	0.54	0.54	0.54	0.56	0.55	0.55	0.55	0.56	0.56	0.56	0.56	0.55	0.54	0.54	0.55	0.55	0.55	0.59	0.6	0.59	0.58	0.59	0.6	0.57	0.56	0.55	0.55	0.55	0.56	0.58	0.57	0.58	0.57	0.59	0.57	0.57	0.57	0.58	0.57	0.57	0.58	0.57	0.57
Sphingomonas ginsenosidimutans KACC 14949	0.52	0.56	0.55	0.56	0.55	0.55	0.55	0.54	0.55	0.56	0.55	0.55	0.55	0.56	0.56	0.56	0.56	0.56	0.54	0.54	0.56	0.55	0.56	0.59	0.6	0.59	0.57	0.6	0.6	0.57	0.56	0.56	0.56	0.56	0.56	0.58	0.58	0.58	0.57	0.57	0.57	0.57	0.57	0.58	0.57	0.57	0.58	0.57	0.57
Sphingomonas adhaesiva DSM 7418	0.53	0.56	0.55	0.56	0.56	0.55	0.55	0.55	0.55	0.56	0.55	0.56	0.55	0.56	0.56	0.55	0.56	0.56	0.54	0.55	0.56	0.55	0.56	0.59	0.6	0.59	0.58	0.6	0.61	0.57	0.56	0.56	0.56	0.56	0.56	0.58	0.58	0.58	0.57	0.58	0.57	0.57	0.57	0.58	0.57	0.57	0.58	0.57	0.57
Sphingomonas phyllosphaerae FA2	0.53	0.56	0.54	0.55	0.55	0.55	0.54	0.55	0.54	0.55	0.55	0.55	0.55	0.55	0.56	0.55	0.55	0.55	0.54	0.54	0.55	0.54	0.55	0.59	0.59	0.59	0.59	0.6	0.6	0.57	0.56	0.55	0.55	0.55	0.56	0.58	0.57	0.58	0.57	0.57	0.57	0.57	0.56	0.57	0.57	0.57	0.58	0.57	0.57
Sphingomonas endophytica DSM 101535	0.53	0.56	0.55	0.55	0.56	0.55	0.54	0.55	0.55	0.55	0.55	0.55	0.55	0.56	0.56	0.55	0.56	0.55	0.54	0.54	0.55	0.54	0.55	0.59	0.59	0.59	0.59	0.59	0.6	0.57	0.55	0.55	0.55	0.55	0.56	0.58	0.57	0.58	0.57	0.58	0.57	0.58	0.57	0.58	0.58	0.57	0.58	0.57	0.57
Sphingomonas citri RRHST34	0.53	0.56	0.55	0.55	0.55	0.54	0.54	0.54	0.54	0.55	0.55	0.55	0.55	0.55	0.55	0.55	0.55	0.55	0.54	0.54	0.55	0.54	0.55	0.59	0.6	0.59	0.58	0.59	0.6	0.57	0.56	0.55	0.55	0.56	0.56	0.58	0.58	0.57	0.57	0.59	0.57	0.57	0.57	0.58	0.58	0.57	0.58	0.57	0.57
Sphingomonas folli RHCKR7	0.53	0.56	0.55	0.55	0.55	0.55	0.55	0.54	0.54	0.55	0.55	0.55	0.55	0.55	0.56	0.56	0.55	0.55	0.54	0.54	0.55	0.54	0.55	0.59	0.6	0.59	0.58	0.59	0.6	0.57	0.55	0.55	0.55	0.55	0.56	0.58	0.57	0.58	0.57	0.58	0.57	0.57	0.57	0.58	0.57	0.57	0.58	0.57	0.57
Sphingomonas yunnanensis CCTCC-AB-204064	0.53	0.56	0.55	0.55	0.55	0.54	0.55	0.54	0.54	0.55	0.55	0.55	0.55	0.55	0.56	0.56	0.55	0.55	0.54	0.54	0.55	0.54	0.55	0.59	0.6	0.59	0.58	0.59	0.6	0.57	0.55	0.55	0.55	0.55	0.56	0.58	0.57	0.58	0.57	0.58	0.57	0.57	0.57	0.58	0.57	0.56	0.58	0.57	0.57
Sphingomonas lenta 1PNM-20	0.53	0.56	0.55	0.55	0.55	0.54	0.55	0.54	0.54	0.56	0.54	0.55	0.56	0.56	0.56	0.56	0.55	0.55	0.55	0.54	0.55	0.55	0.55	0.6	0.6	0.6	0.58	0.6	0.61	0.57	0.56	0.56	0.56	0.56	0.56	0.58	0.58	0.58	0.57	0.58	0.58	0.57	0.57	0.58	0.57	0.57	0.59	0.57	0.58
Sphingomonas jinjuensis YC6723	0.53	0.56	0.55	0.55	0.56	0.54	0.54	0.54	0.54	0.56	0.55	0.55	0.56	0.56	0.56	0.56	0.56	0.55	0.54	0.54	0.56	0.55	0.55	0.59	0.6	0.59	0.58	0.6	0.6	0.57	0.56	0.56	0.55	0.56	0.56	0.58	0.58	0.58	0.58	0.58	0.58	0.58	0.57	0.58	0.57	0.57	0.58	0.57	0.58
Sphingomonas aerophila DSM 100044	0.53	0.56	0.54	0.55	0.54	0.54	0.54	0.54	0.53	0.55	0.54	0.55	0.55	0.55	0.55	0.55	0.55	0.55	0.53	0.53	0.55	0.54	0.55	0.59	0.59	0.58	0.59	0.59	0.6	0.56	0.55	0.55	0.54	0.55	0.56	0.58	0.57	0.57	0.57	0.58	0.57	0.57	0.56	0.57	0.57	0.57	0.58	0.57	0.57
Sphingomonas gellani S6-262	0.52	0.55	0.54	0.55	0.54	0.54	0.54	0.54	0.54	0.55	0.55	0.55	0.55	0.55	0.55	0.55	0.55	0.55	0.53	0.54	0.55	0.54	0.55	0.58	0.59	0.58	0.58	0.59	0.59	0.56	0.55	0.55	0.55	0.55	0.55	0.57	0.57	0.57	0.57	0.58	0.57	0.57	0.56	0.57	0.57	0.56	0.57	0.57	0.57
Sphingomonas aquatilis NBRC 16722	0.53	0.56	0.55	0.56	0.56	0.54	0.54	0.54	0.54	0.56	0.55	0.55	0.55	0.56	0.56	0.55	0.56	0.56	0.54	0.54	0.55	0.55	0.55	0.59	0.6	0.59	0.58	0.6	0.6	0.57	0.56	0.56	0.56	0.56	0.57	0.58	0.58	0.58	0.57	0.58	0.57	0.57	0.57	0.58	0.57	0.57	0.58	0.57	0.57
Sphingomonas melonis DAPP-PG 224	0.53	0.56	0.55	0.56	0.56	0.54	0.54	0.54	0.54	0.56	0.55	0.55	0.55	0.56	0.56	0.55	0.56	0.55	0.54	0.54	0.55	0.55	0.55	0.59	0.59	0.59	0.58	0.6	0.6	0.57	0.56	0.56	0.55	0.56	0.56	0.58	0.58	0.58	0.57	0.58	0.57	0.57	0.57	0.58	0.57	0.57	0.58	0.57	0.57
Sphingomonas kyungheensis LMG 26582	0.53	0.56	0.55	0.55	0.55	0.54	0.54	0.54	0.54	0.56	0.56	0.55	0.55	0.55	0.55	0.55	0.56	0.55	0.54	0.54	0.55	0.55	0.55	0.59	0.6	0.59	0.59	0.6	0.6	0.57	0.56	0.56	0.55	0.56	0.56	0.58	0.58	0.58	0.57	0.59	0.57	0.57	0.57	0.58	0.58	0.57	0.58	0.57	0.57
Sphingomonas insulae KCTC 12872	0.53	0.56	0.55	0.56	0.56	0.55	0.54	0.54	0.54	0.55	0.55	0.55	0.55	0.56	0.56	0.56	0.56	0.55	0.54	0.54	0.55	0.54	0.55	0.59	0.6	0.59	0.58	0.59	0.6	0.57	0.56	0.55	0.55	0.56	0.56	0.57	0.57	0.57	0.57	0.58	0.57	0.57	0.57	0.57	0.57	0.56	0.58	0.57	0.57
Sphingomonas oligophenolica S5_1	0.52	0.57	0.55	0.55	0.56	0.55	0.54	0.54	0.54	0.56	0.55	0.55	0.56	0.56	0.56	0.56	0.56	0.56	0.54	0.54	0.55	0.55	0.56	0.59	0.6	0.59	0.58	0.6	0.6	0.57	0.56	0.56	0.56	0.56	0.56	0.58	0.58	0.58	0.57	0.58	0.57	0.57	0.57	0.58	0.57	0.57	0.58	0.57	0.57
Sphingomonas aerolata NW12	0.53	0.56	0.54	0.55	0.56	0.55	0.54	0.54	0.54	0.56	0.56	0.55	0.56	0.56	0.56	0.56	0.56	0.56	0.54	0.54	0.55	0.54	0.55	0.59	0.6	0.59	0.58	0.6	0.6	0.57	0.55	0.56	0.55	0.56	0.56	0.58	0.57	0.58	0.57	0.58	0.57	0.57	0.57	0.58	0.57	0.56	0.58	0.57	0.57
Sphingomonas aurantiaca MA101b	0.52	0.56	0.54	0.55	0.55	0.54	0.54	0.54	0.54	0.55	0.56	0.55	0.55	0.56	0.56	0.55	0.56	0.56	0.54	0.54	0.55	0.54	0.55	0.59	0.6	0.59	0.58	0.59	0.6	0.57	0.55	0.55	0.55	0.55	0.56	0.57	0.57	0.58	0.57	0.58	0.57	0.57	0.56	0.57	0.57	0.56	0.57	0.57	0.57
Sphingomonas albertensis DOAB 1063	0.53	0.56	0.54	0.55	0.55	0.54	0.54	0.54	0.54	0.55	0.55	0.55	0.55	0.55	0.55	0.55	0.56	0.55	0.54	0.54	0.55	0.54	0.55	0.58	0.6	0.59	0.58	0.6	0.6	0.57	0.55	0.55	0.55	0.55	0.56	0.57	0.57	0.57	0.57	0.57	0.57	0.56	0.56	0.57	0.57	0.56	0.58	0.57	0.57
Sphingomonas faeni MA-olki	0.52	0.56	0.54	0.55	0.55	0.54	0.53	0.53	0.54	0.55	0.55	0.55	0.55	0.55	0.55	0.55	0.56	0.55	0.54	0.53	0.55	0.54	0.55	0.58	0.59	0.58	0.58	0.59	0.59	0.57	0.55	0.55	0.55	0.55	0.56	0.57	0.57	0.57	0.57	0.58	0.57	0.57	0.56	0.57	0.57	0.56	0.57	0.57	0.57
Sphingomonas metalli CGMCC 1.15330	0.53	0.56	0.55	0.55	0.55	0.54	0.54	0.55	0.54	0.55	0.56	0.55	0.56	0.56	0.56	0.56	0.55	0.55	0.54	0.54	0.55	0.55	0.55	0.59	0.6	0.6	0.58	0.6	0.6	0.57	0.55	0.56	0.55	0.56	0.56	0.58	0.58	0.58	0.57	0.59	0.57	0.58	0.57	0.58	0.58	0.57	0.58	0.57	0.58
Sphingomonas abaci DSM 15867	0.53	0.56	0.55	0.55	0.55	0.54	0.54	0.54	0.54	0.55	0.55	0.55	0.55	0.55	0.55	0.55	0.55	0.55	0.54	0.54	0.55	0.54	0.55		0.6	0.59	0.58	0.6		0.56	0.55	0.55	0.55	0.55	0.56	0.58	0.58	0.58	0.57	0.59	0.57	0.57	0.57	0.58	0.58	0.57	0.58	0.57	0.57
Sphingomonas rubra CGMCC 1.9113	0.53	0.57	0.55	0.56	0.56	0.55	0.55	0.54	0.54	0.56	0.55	0.56	0.56	0.56	0.56	0.56	0.56	0.56	0.55	0.55	0.56	0.55	0.56	0.59	0.6	0.6	0.59	0.6	0.6	0.57	0.56	0.56	0.56	0.56	0.57	0.59	0.58	0.58	0.58	0.59	0.58	0.58	0.58	0.58	0.57	0.57	0.59	0.58	0.58
Sphingomonas carotinifaciens DSM 27347	0.53	0.56	0.55	0.55	0.56	0.54	0.54	0.54	0.54	0.56	0.55	0.55	0.55	0.56	0.56	0.56	0.56	0.56	0.54	0.54	0.55	0.54	0.55	0.59	0.6	0.59	0.59	0.6	0.61	0.57	0.56	0.56	0.55	0.56	0.56	0.58	0.58	0.58	0.57	0.59	0.57	0.57	0.57	0.58	0.58	0.57	0.58	0.57	0.57
Sphingomonas paucimobilis NCTC11030	0.53	0.56	0.54	0.55	0.55	0.54	0.53	0.53	0.54	0.55	0.54	0.54	0.54	0.55	0.55	0.55	0.55	0.55	0.54	0.54	0.55	0.54	0.55	0.58	0.59	0.59	0.58	0.59	0.6	0.57	0.55	0.55	0.55	0.55	0.56	0.57	0.57	0.58	0.57	0.58	0.57	0.56	0.56	0.57	0.57	0.56	0.58	0.57	0.57
Sphingomonas pseudosanguinis DSM 19512	0.53	0.56	0.54	0.55	0.56	0.55	0.54	0.54	0.54	0.55	0.54	0.55	0.55	0.55	0.55	0.55	0.55	0.55	0.54	0.54	0.55	0.54	0.55	0.59	0.6	0.59	0.58	0.6	0.6	0.57	0.56	0.56	0.55	0.55	0.56	0.58	0.57	0.58	0.57	0.58	0.57	0.57	0.56	0.57	0.57	0.57	0.58	0.57	0.57
Sphingomonas zeae CCM 8596	0.53	0.56	0.54	0.55	0.56	0.54	0.54	0.54	0.54	0.55	0.54	0.55	0.55	0.55	0.55	0.55	0.55	0.55	0.53	0.54	0.55	0.54	0.55	0.58	0.59	0.59	0.58	0.59	0.6	0.56	0.55	0.55	0.55	0.55	0.56	0.57	0.57	0.58	0.57	0.58	0.57	0.57	0.56	0.57	0.57	0.56	0.58	0.56	0.57
Sphingomonas sanguinis NBRC 13937	0.53	0.56	0.54	0.55	0.55	0.54	0.53	0.54	0.54	0.55	0.55	0.55	0.54	0.55	0.55	0.55	0.55	0.55	0.53	0.54	0.54	0.54	0.55	0.58	0.59	0.59	0.58	0.59	0.6	0.56	0.55	0.55	0.55	0.55	0.56	0.57	0.57	0.57	0.57	0.58	0.57	0.57	0.56	0.57	0.57	0.56	0.58	0.57	0.57
Sphingomonas parapaucimobilis NBRC 15100	0.53	0.56	0.54	0.55	0.55	0.54	0.54	0.54	0.54	0.55	0.54	0.55	0.55	0.55	0.55	0.55	0.55	0.55	0.53	0.54	0.55	0.54	0.55	0.59	0.6	0.59	0.58	0.59	0.6	0.57	0.55	0.55	0.55	0.55	0.56	0.58	0.57	0.58	0.57	0.58	0.57	0.57	0.56	0.57	0.57	0.56	0.58	0.57	0.57
Sphingomonas yabuuchiae DSM 14562	0.52	0.56	0.54	0.55	0.55	0.54	0.54	0.54	0.53	0.55	0.55	0.54	0.55	0.55	0.55	0.55	0.55	0.55	0.53	0.53	0.55	0.54	0.55	0.58	0.59	0.59	0.57	0.6	0.6	0.57	0.55	0.56	0.55	0.55	0.56	0.57	0.57	0.58	0.57	0.58	0.57	0.57	0.56	0.57	0.57	0.56	0.58	0.57	0.57
Sphingomonas paeninsulae YZ-8	0.53	0.56	0.54	0.55	0.55	0.54	0.54	0.53	0.54	0.55	0.55	0.55	0.55	0.55	0.56	0.55	0.55	0.55	0.54	0.54	0.55	0.54	0.55	0.58	0.59	0.59	0.57	0.6	0.6	0.57	0.55	0.55	0.55	0.55	0.56	0.57	0.57	0.58	0.56	0.56	0.56	0.56	0.56	0.57	0.56	0.56	0.58	0.57	0.57
Aquisediminimonas sediminicola CH68-4	0.53	0.56	0.54	0.56	0.56	0.55	0.55	0.54	0.54	0.57	0.54	0.55	0.55	0.55	0.56	0.55	0.55	0.55	0.54	0.55	0.56	0.55	0.55	0.58	0.6	0.6	0.57	0.6	0.6	0.57	0.56	0.56	0.56	0.55	0.56	0.57	0.57	0.57	0.57	0.56	0.57	0.56	0.56	0.57	0.57	0.56	0.58	0.56	0.56
Aquisediminimonas profunda DS48-3	0.52	0.56	0.54	0.56	0.56	0.55	0.55	0.54	0.54	0.57	0.55	0.55	0.55	0.56	0.56	0.56	0.56	0.55	0.54	0.55	0.56	0.56	0.56	0.59	0.6	0.6	0.57	0.61	0.61	0.57	0.56	0.56	0.55	0.56	0.56	0.58	0.58	0.58	0.58	0.57	0.57	0.57	0.57	0.58	0.57	0.57	0.58	0.57	0.58
Chakrabartia godavariana PRB40	0.53	0.57	0.54	0.56	0.56	0.55	0.55	0.54	0.55	0.57	0.55	0.55	0.55	0.56	0.56	0.56	0.56	0.55	0.54	0.55	0.56	0.56	0.56	0.59	0.6	0.6	0.58	0.61	0.61	0.58	0.57	0.56	0.56	0.56	0.57	0.58	0.58	0.58	0.58	0.58	0.58	0.57	0.57	0.58	0.58	0.57	0.59	0.58	0.58
Parasphingopyxis marina GrpM-11	0.52	0.55	0.55	0.55	0.55	0.53	0.54	0.53	0.53	0.54	0.53	0.53	0.54	0.55	0.55	0.55	0.54	0.54	0.53	0.53	0.54	0.54	0.54	0.59	0.6	0.61	0.57	0.6	0.61	0.58	0.56	0.56	0.56	0.56	0.57	0.57	0.57	0.57	0.57	0.56	0.57	0.56	0.56	0.57	0.57	0.56	0.58	0.57	0.57
Parasphingopyxis algicola JCM 31719	0.52	0.55	0.55	0.55	0.55	0.55	0.54	0.53	0.53	0.55	0.53	0.54	0.55	0.55	0.55	0.55	0.54	0.54	0.53	0.54	0.55	0.54	0.54	0.58	0.6	0.6	0.57	0.6	0.6	0.58	0.56	0.57	0.56	0.57	0.57	0.57	0.56	0.57	0.57	0.56	0.57	0.55	0.56	0.57	0.55	0.56	0.57	0.56	0.57
Parasphingopyxis lamellibrachiae DSM 26725	0.52	0.55	0.55	0.56	0.56	0.54	0.54	0.53	0.53	0.55	0.53	0.54	0.54	0.55	0.55	0.55	0.54	0.55	0.53	0.54	0.54	0.54	0.54	0.59	0.6	0.6	0.57	0.6	0.61	0.57	0.56	0.56	0.56	0.56	0.57	0.57	0.57	0.58	0.57	0.56	0.57	0.56	0.56	0.57	0.56	0.56	0.57	0.56	0.57
Rhizorhapis suberifaciens DSM 7465	0.53	0.56	0.54	0.56	0.56	0.54	0.54	0.54	0.54	0.55	0.54	0.54	0.55	0.55	0.56	0.55	0.55	0.55	0.54	0.53	0.55	0.54	0.55	0.59	0.6	0.61	0.58	0.61	0.61	0.57	0.56	0.56	0.55	0.56	0.56	0.57	0.57	0.58	0.57	0.57	0.57	0.56	0.56	0.57	0.57	0.56	0.58	0.57	0.57
Sphingobium sufflavum HL-25	0.52	0.55	0.53	0.54	0.54	0.53	0.53	0.53	0.53	0.54	0.53	0.53	0.54	0.54	0.55	0.54	0.54	0.54	0.52	0.53	0.54	0.53	0.54	0.57	0.58	0.57	0.56	0.58	0.59	0.56	0.55	0.54	0.54	0.55	0.55	0.56	0.56	0.56	0.55	0.55	0.55	0.55	0.55	0.56	0.56	0.55	0.57	0.56	0.56
Sphingobium lignivorans B1D3A	0.53	0.55	0.54	0.55	0.55	0.54	0.54	0.54	0.54	0.55	0.53	0.53	0.54	0.54	0.55	0.54	0.55	0.54	0.53	0.53	0.54	0.54	0.54	0.57	0.59	0.58	0.56	0.59	0.59	0.56	0.55	0.55	0.54	0.55	0.55	0.56	0.56	0.57	0.56	0.56	0.56	0.55	0.56	0.56	0.56	0.55	0.57	0.56	0.56
Sphingobium xanthum NL9	0.52	0.55	0.54	0.54	0.55	0.53	0.53	0.53	0.53	0.54	0.52	0.53	0.54	0.54	0.54	0.54	0.55	0.54	0.53	0.53	0.54	0.54	0.54	0.57	0.58	0.58	0.55	0.58	0.59	0.55	0.55	0.54	0.54	0.54	0.55	0.56	0.56	0.57	0.56	0.55	0.55	0.55	0.55	0.56	0.56	0.55	0.57	0.56	0.56
Sphingobium subterraneum DSM 102255	0.53	0.56	0.54	0.55	0.56	0.54	0.54	0.54	0.54	0.55	0.54	0.55	0.55	0.55	0.56	0.55	0.55	0.55	0.54	0.54	0.55	0.55	0.55	0.58	0.59	0.59	0.57	0.6	0.6	0.57	0.56	0.55	0.55	0.55	0.56	0.57	0.57	0.57	0.57	0.57	0.57	0.56	0.56	0.57	0.56	0.56	0.57	0.57	0.56
Sphingobium fluviale CHR27	0.53	0.55	0.54	0.56	0.56	0.54	0.54	0.55	0.55	0.55	0.53	0.54	0.54	0.54	0.55	0.55	0.54	0.54	0.53	0.54	0.55	0.55	0.55	0.58	0.59	0.59	0.56	0.59	0.59	0.57	0.55	0.56	0.55	0.55	0.56	0.56	0.57	0.57	0.56	0.56	0.56	0.56	0.56	0.56	0.56	0.55	0.57	0.57	0.56
Sphingobium jiangsuense NBRC 112973	0.53	0.55	0.54	0.55	0.56	0.54	0.54	0.55	0.54	0.54	0.53	0.54	0.54	0.54	0.55	0.55	0.54	0.54	0.53	0.54	0.54	0.54	0.54	0.58	0.58	0.59	0.57	0.59	0.59	0.57	0.56	0.55	0.55	0.55	0.56	0.57	0.57	0.57	0.56	0.56	0.56	0.56	0.56	0.57	0.56	0.55	0.57	0.56	0.56
Sphingobium algorifonticola TLA-22	0.53	0.56	0.54	0.56	0.57	0.55	0.55	0.53	0.54	0.56	0.55	0.55	0.56	0.56	0.56	0.56	0.56	0.55	0.55	0.55	0.56	0.55	0.56	0.58	0.6	0.6	0.57	0.6	0.61	0.57	0.56	0.56	0.55	0.55	0.56	0.57	0.57	0.58	0.58	0.57	0.57	0.56	0.57	0.57	0.57	0.56	0.58	0.57	0.57
Sphingobium phenoxybenzoativorans SC_3	0.53	0.55	0.54	0.55	0.56	0.54	0.54	0.55	0.55	0.55	0.53	0.55	0.54	0.55	0.54	0.54	0.54	0.54	0.53	0.54	0.54	0.54	0.54	0.58	0.6	0.59	0.57	0.6	0.6	0.57	0.56	0.55	0.55	0.55	0.56	0.57	0.57	0.57	0.57	0.56	0.56	0.56	0.56	0.56	0.56	0.56	0.57	0.57	0.57
Sphingobium aquiterrae DSM 106441	0.53	0.56	0.54	0.56	0.56	0.54	0.54	0.56	0.55	0.55	0.54	0.54	0.54	0.55	0.55	0.55	0.55	0.55	0.54	0.54	0.55	0.54	0.55	0.58	0.59	0.59	0.57	0.6	0.6	0.57	0.55	0.55	0.55	0.55	0.56	0.57	0.57	0.57	0.56	0.57	0.56	0.56	0.56	0.57	0.56	0.55	0.58	0.56	0.56
Sphingobium aromaticiconvertens DSM12677complete	0.53	0.56	0.54	0.55	0.55	0.53	0.53	0.56	0.54	0.55	0.53	0.54	0.54	0.54	0.55	0.54	0.55	0.55	0.53	0.53	0.54	0.54	0.54	0.58	0.59	0.59	0.57	0.6	0.6	0.56	0.55	0.54	0.54	0.55	0.55	0.56	0.57	0.57	0.56	0.56	0.56	0.56	0.55	0.56	0.56	0.55	0.57	0.56	0.56
Sphingobium fontiphilum DSM 29348	0.53	0.56	0.55	0.56	0.56	0.54	0.54	0.55	0.54	0.56	0.54	0.54	0.55	0.55	0.55	0.55	0.55	0.55	0.54	0.54	0.55	0.55	0.55	0.59	0.6	0.59	0.57	0.6	0.6	0.57	0.56	0.56	0.55	0.56	0.56	0.57	0.57	0.58	0.57	0.57	0.57	0.56	0.56	0.57	0.57	0.56	0.57	0.57	0.57
Sphingobium naphthae FXH-27	0.54	0.56	0.55	0.55	0.56	0.54	0.54	0.54	0.54	0.55	0.54	0.54	0.55	0.55	0.56	0.55	0.55	0.55	0.54	0.54	0.55	0.55	0.55	0.59	0.6	0.59	0.58	0.6	0.6	0.57	0.56	0.55	0.55	0.55	0.56	0.57	0.57	0.58	0.57	0.57	0.57	0.56	0.56	0.57	0.57	0.56	0.58	0.57	0.57
Sphingobium lactosutens DS20	0.53	0.55	0.54	0.55	0.56	0.54	0.53	0.55	0.55	0.55	0.53	0.54	0.54	0.54	0.55	0.54	0.54	0.54	0.53	0.54	0.54	0.54	0.54	0.58	0.59	0.59	0.57	0.6	0.6	0.56	0.55	0.55	0.55	0.55	0.56	0.57	0.56	0.57	0.57	0.57	0.56	0.56	0.56	0.57	0.57	0.55	0.58	0.56	0.56
Sphingobium abikonense NBRC 16140	0.53	0.56	0.54	0.55	0.56	0.54	0.54	0.54	0.54	0.55	0.54	0.55	0.54	0.55	0.55	0.55	0.55	0.55	0.54	0.54	0.55	0.54	0.55	0.59	0.59	0.59	0.58	0.6	0.6	0.57	0.56	0.56	0.55	0.55	0.56	0.57	0.57	0.58	0.57	0.57	0.57	0.56	0.56	0.57	0.57	0.56	0.58	0.57	0.57
Sphingobium olei DSM 18999 contigs	0.53	0.56	0.54	0.55	0.56	0.54	0.54	0.54	0.54	0.55	0.53	0.54	0.54	0.54	0.55	0.54	0.55	0.55	0.53	0.54	0.55	0.54	0.55	0.59	0.59	0.59	0.58	0.6	0.6	0.56	0.55	0.55	0.54	0.55	0.55	0.57	0.57	0.57	0.57	0.57	0.56	0.56	0.56	0.57	0.57	0.56	0.57	0.56	0.56
Sphingobium amiense DSM 16289	0.53	0.55	0.54	0.56	0.56	0.54	0.54	0.56	0.55	0.55	0.54	0.54	0.55	0.54	0.55	0.54	0.54	0.54	0.53	0.54	0.54	0.54	0.55	0.58	0.59	0.59	0.57	0.6	0.6	0.56	0.55	0.55	0.55	0.55	0.55	0.57	0.57	0.58	0.56	0.56	0.56	0.56	0.56	0.56	0.57	0.56	0.57	0.56	0.56
Sphingobium rhizovicinum CCM 7491	0.53	0.55	0.54	0.55	0.55	0.53	0.53	0.54	0.53	0.54	0.53	0.53	0.54	0.54	0.54	0.54	0.55	0.54	0.53	0.53	0.54	0.53	0.54	0.58	0.59	0.58	0.57	0.59	0.59	0.56	0.55	0.55	0.54	0.54	0.55	0.56	0.56	0.57	0.56	0.56	0.56	0.55	0.55	0.56	0.56	0.55	0.57	0.56	0.56
Sphingobium scionense ICMP 13533	0.53	0.55	0.54	0.55	0.55	0.54	0.53	0.56	0.54	0.55	0.53	0.54	0.54	0.54	0.54	0.54	0.54	0.54	0.53	0.53	0.54	0.53	0.54	0.57	0.59	0.59	0.57	0.59	0.59	0.56	0.55	0.55	0.54	0.55	0.55	0.57	0.56	0.57	0.56	0.56	0.55	0.56	0.55	0.56	0.56	0.55	0.57	0.56	0.56
Sphingobium yanoikuyae ATCC 51230	0.53	0.56	0.54	0.55	0.55	0.53	0.53	0.55	0.54	0.54	0.53	0.54	0.54	0.54	0.55	0.54	0.55	0.55	0.53	0.53	0.54	0.54	0.54	0.58	0.59	0.59	0.57	0.6	0.59	0.57	0.55	0.55	0.55	0.55	0.56	0.57	0.56	0.57	0.56	0.56	0.56	0.55	0.56	0.56	0.56	0.55	0.57	0.56	0.57
Sphingobium limneticum DSM 25076	0.53	0.55	0.54	0.55	0.55	0.53	0.53	0.54	0.54	0.54	0.53	0.54	0.54	0.54	0.54	0.54	0.54	0.54	0.53	0.53	0.54	0.53	0.54	0.58	0.59	0.58	0.57	0.59	0.59	0.56	0.55	0.55	0.54	0.55	0.55	0.56	0.56	0.57	0.56	0.56	0.56	0.55	0.55	0.56	0.56	0.55	0.57	0.56	0.56
Sphingobium cupriresistens CCTCC AB 2011146	0.53	0.55	0.54	0.55	0.55	0.54	0.53	0.54	0.55	0.55	0.53	0.54	0.55	0.54	0.54	0.54	0.54	0.54	0.53	0.53	0.54	0.54	0.54	0.58	0.59	0.59	0.57	0.59	0.59	0.56	0.55	0.55	0.55	0.55	0.56	0.57	0.57	0.57	0.56	0.56	0.56	0.55	0.56	0.56	0.57	0.56	0.57	0.56	0.56
Sphingobium psychrophilum AR-3-1	0.53	0.55	0.54	0.54	0.55	0.53	0.53	0.54	0.54	0.54	0.53	0.53	0.54	0.54	0.54	0.54	0.54	0.54	0.53	0.53	0.54	0.54	0.54	0.57	0.58	0.58	0.57	0.59	0.59	0.56	0.55	0.55	0.54	0.55	0.55	0.57	0.56	0.57	0.56	0.56	0.56	0.55	0.55	0.56	0.56	0.55	0.57	0.56	0.56
Sphingobium terrigena EO9	0.53	0.55	0.54	0.55	0.55	0.53	0.53	0.54	0.53	0.55	0.53	0.54	0.54	0.54	0.55	0.54	0.55	0.55	0.53	0.53	0.54	0.54	0.55	0.57	0.59	0.59	0.57	0.59	0.6	0.56	0.55	0.55	0.54	0.55	0.55	0.57	0.56	0.57	0.56	0.56	0.56	0.55	0.56	0.56	0.56	0.55	0.57	0.56	0.56
Sphingobium xenophagum NBRC 107872	0.53	0.55	0.54	0.55	0.55	0.53	0.53	0.54	0.54	0.55	0.53	0.54	0.54	0.54	0.55	0.54	0.54	0.54	0.53	0.54	0.54	0.54	0.55	0.58	0.59	0.59	0.56	0.6	0.6	0.56	0.56	0.55	0.55	0.55	0.56	0.57	0.57	0.57	0.56	0.56	0.56	0.56	0.56	0.57	0.56	0.56	0.57	0.56	0.56
Sphingobium ummariense RL-3	0.54	0.56	0.55	0.56	0.56	0.54	0.54	0.55	0.55	0.55	0.54	0.54	0.54	0.55	0.55	0.54	0.55	0.55	0.53	0.54	0.55	0.55	0.55	0.59	0.6	0.6	0.58	0.6	0.6	0.57	0.55	0.56	0.55	0.55	0.56	0.58	0.57	0.58	0.57	0.57	0.57	0.56	0.56	0.57	0.57	0.56	0.58	0.57	0.57
Sphingobium cloacae JCM 10874	0.53	0.56	0.54	0.56	0.56	0.54	0.54	0.57	0.55	0.55	0.53	0.54	0.54	0.54	0.55	0.54	0.54	0.54	0.53	0.54	0.55	0.54	0.55	0.59	0.59	0.6	0.56	0.6	0.6	0.57	0.56	0.55	0.55	0.55	0.56	0.57	0.57	0.58	0.57	0.56	0.56	0.56	0.56	0.57	0.56	0.56	0.58	0.56	0.57
Sphingobium faniae CGMCC 1.7749	0.53	0.55	0.54	0.55	0.56	0.54	0.53	0.57	0.54	0.55	0.52	0.54	0.54	0.54	0.54	0.53	0.54	0.54	0.53	0.54	0.54	0.54	0.54	0.58	0.59	0.59	0.56	0.6	0.59	0.56	0.55	0.55	0.55	0.55	0.56	0.57	0.56	0.57	0.56	0.56	0.56	0.55	0.55	0.56	0.56	0.55	0.57	0.56	0.56
Sphingobium wenxiniae CGMCC 1.7748	0.53	0.56	0.55	0.56	0.56	0.54	0.53	0.54	0.54	0.55	0.53	0.54	0.54	0.54	0.55	0.54	0.54	0.54	0.53	0.54	0.55	0.54	0.54	0.58	0.6	0.59	0.57	0.6	0.6	0.57	0.56	0.56	0.55	0.55	0.56	0.57	0.57	0.58	0.56	0.56	0.56	0.56	0.56	0.57	0.56	0.56	0.58	0.56	0.56
Sphingobium baderi LL03	0.53	0.55	0.54	0.56	0.56	0.53	0.53	0.55	0.54	0.55	0.53	0.54	0.54	0.54	0.55	0.54	0.54	0.54	0.53	0.54	0.55	0.54	0.54	0.58	0.59	0.59	0.57	0.6	0.6	0.56	0.55	0.55	0.55	0.55	0.56	0.57	0.57	0.57	0.56	0.56	0.56	0.56	0.55	0.56	0.56	0.56	0.57	0.56	0.56
Sphingobium vermicomposti DSM 21299	0.53	0.56	0.54	0.55	0.55	0.53	0.54	0.54	0.54	0.55	0.53	0.54	0.54	0.55	0.55	0.55	0.55	0.54	0.53	0.53	0.55	0.54	0.55	0.58	0.6	0.6	0.57	0.6	0.6	0.57	0.56	0.55	0.55	0.55	0.56	0.57	0.56	0.57	0.56	0.56	0.56	0.55	0.56	0.56	0.57	0.56	0.57	0.56	0.57
Sphingobium quisquiliarum P25	0.53	0.56	0.55	0.56	0.56	0.54	0.54	0.55	0.55	0.55	0.54	0.54	0.55	0.55	0.55	0.55	0.55	0.54	0.53	0.54	0.55	0.54	0.55	0.58	0.6	0.59	0.58	0.6	0.6	0.57	0.56	0.55	0.55	0.55	0.56	0.57	0.57	0.58	0.57	0.57	0.57	0.56	0.56	0.57	0.57	0.56	0.58	0.57	0.57
Sphingobium herbicidovorans MH	0.53	0.55	0.54	0.56	0.55	0.53	0.53	0.54	0.54	0.55	0.53	0.54	0.54	0.55	0.55	0.54	0.54	0.54	0.53	0.54	0.55	0.54	0.54	0.58	0.59	0.59	0.57	0.6	0.6	0.56	0.55	0.55	0.55	0.55	0.55	0.57	0.56	0.57	0.56	0.56	0.57	0.55	0.55	0.56	0.56	0.55	0.57	0.56	0.57
Sphingobium mellinum DSM 7458	0.53	0.55	0.54	0.56	0.56	0.54	0.54	0.54	0.54	0.55	0.54	0.54	0.54	0.54	0.55	0.55	0.55	0.54	0.53	0.54	0.54	0.54	0.55	0.59	0.59	0.59	0.57	0.6	0.6	0.57	0.56	0.55	0.55	0.55	0.56	0.57	0.57	0.57	0.56	0.57	0.57	0.56	0.56	0.57	0.57	0.56	0.57	0.57	0.57
Sphingobium bisphenolivorans YL23	0.53	0.56	0.54	0.56	0.55	0.53	0.54	0.54	0.54	0.55	0.53	0.54	0.54	0.55	0.55	0.54	0.55	0.54	0.53	0.53	0.55	0.54	0.55	0.58	0.59	0.59	0.58	0.6	0.6	0.57	0.56	0.55	0.55	0.55	0.56	0.57	0.57	0.57	0.56	0.56	0.56	0.56	0.56	0.56	0.57	0.56	0.57	0.56	0.57
Sphingobium indicum B90A	0.53	0.56	0.54	0.56	0.56	0.54	0.54	0.54	0.54	0.55	0.53	0.54	0.54	0.55	0.55	0.54	0.55	0.55	0.53	0.54	0.55	0.54	0.55	0.58	0.6	0.6	0.58	0.6	0.6	0.57	0.56	0.56	0.55	0.55	0.56	0.57	0.57	0.57	0.56	0.56	0.57	0.56	0.56	0.57	0.57	0.56	0.58	0.57	0.57
Sphingobium fuliginis DSM 18781	0.53	0.55	0.54	0.56	0.55	0.53	0.54	0.55	0.54	0.55	0.53	0.54	0.54	0.55	0.55	0.54	0.55	0.54	0.53	0.54	0.55	0.54	0.54	0.58	0.59	0.6	0.58	0.6	0.6	0.56	0.55	0.55	0.54	0.55	0.56	0.57	0.57	0.57	0.56	0.56	0.57	0.56	0.55	0.57	0.57	0.56	0.58	0.56	0.57
Sphingobium chlorophenolicum NBRC 16172	0.53	0.55	0.54	0.55	0.56	0.53	0.54	0.55	0.55	0.55	0.53	0.54	0.54	0.54	0.55	0.54	0.54	0.54	0.53	0.54	0.55	0.54	0.55	0.58	0.59	0.59	0.57	0.6	0.6	0.57	0.55	0.55	0.55	0.55	0.56	0.57	0.57	0.57	0.56	0.56	0.56	0.55	0.56	0.56	0.57	0.55	0.57	0.56	0.56
Sphingobium estronivorans AXB	0.53	0.56	0.54	0.55	0.55	0.53	0.53	0.54	0.54	0.55	0.53	0.54	0.54	0.55	0.55	0.54	0.54	0.54	0.53	0.53	0.54	0.53	0.54	0.58	0.59	0.59	0.57	0.6	0.6	0.57	0.55	0.55	0.55	0.55	0.56	0.57	0.57	0.57	0.56	0.56	0.56	0.56	0.56	0.57	0.56	0.55	0.57	0.57	0.56
Sphingobium chungbukense DJ77	0.52	0.55	0.54	0.55	0.55	0.53	0.53	0.53	0.54	0.54	0.53	0.53	0.54	0.54	0.54	0.54	0.54	0.54	0.53	0.53	0.54	0.54	0.54	0.58	0.59	0.59	0.56	0.59	0.59	0.56	0.55	0.55	0.55	0.55	0.55	0.57	0.56	0.57	0.56	0.56	0.56	0.55	0.55	0.56	0.56	0.55	0.57	0.56	0.56
Sphingorhabdus soli D-2Q-5-6	0.52	0.56	0.54	0.55	0.55	0.54	0.54	0.53	0.53	0.55	0.54	0.54	0.54	0.55	0.55	0.55	0.55	0.54	0.53	0.54	0.55	0.54	0.55	0.59	0.59	0.59	0.57	0.59	0.6	0.58	0.57	0.56	0.56	0.57	0.57	0.58	0.58	0.58	0.58	0.57	0.57	0.57	0.57	0.57	0.57	0.57	0.58	0.57	0.57
Sphingomonas lacunae CSW-10	0.52	0.56	0.54	0.55	0.55	0.55	0.55	0.54	0.54	0.56	0.53	0.54	0.54	0.55	0.55	0.55	0.55	0.55	0.54	0.55	0.55	0.55	0.55	0.57	0.58	0.58	0.56	0.59	0.59	0.57	0.56	0.56	0.55	0.56	0.57	0.57	0.57	0.58	0.57	0.56	0.57	0.56	0.56	0.57	0.56	0.56	0.57	0.56	0.56
Sphingopyxis granuli NBRC 100800	0.52	0.56	0.54	0.56	0.55	0.54	0.54	0.54	0.55	0.55	0.53	0.54	0.54	0.55	0.55	0.54	0.54	0.55	0.53	0.54	0.55	0.54	0.55	0.58	0.59	0.59	0.56	0.59	0.59	0.57	0.56	0.56	0.55	0.56	0.56	0.58	0.57	0.58	0.57	0.56	0.57	0.56	0.56	0.57	0.56	0.56	0.57	0.57	0.57
Sphingopyxis indica DS15	0.53	0.55	0.54	0.56	0.57	0.55	0.54	0.55	0.55	0.55	0.53	0.54	0.54	0.54	0.55	0.55	0.55	0.55	0.53	0.54	0.55	0.54	0.55	0.57	0.58	0.59	0.56	0.59	0.59	0.57	0.56	0.55	0.55	0.56	0.56	0.57	0.57	0.58	0.57	0.56	0.57	0.56	0.56	0.57	0.56	0.56	0.57	0.57	0.57
Sphingopyxis panaciterrulae DSM 27163	0.52	0.55	0.54	0.55	0.56	0.54	0.54	0.54	0.55	0.55	0.53	0.54	0.54	0.54	0.55	0.54	0.55	0.54	0.53	0.54	0.55	0.54	0.55	0.58	0.58	0.58	0.56	0.59	0.59	0.57	0.56	0.56	0.55	0.56	0.56	0.57	0.57	0.57	0.57	0.56	0.56	0.56	0.56	0.57	0.56	0.56	0.57	0.57	0.56
Sphingopyxis flava R11H	0.52	0.55	0.54	0.56	0.55	0.54	0.54	0.53	0.55	0.54	0.52	0.53	0.54	0.54	0.54	0.54	0.54	0.54	0.53	0.54	0.55	0.54	0.55	0.57	0.58	0.58	0.55	0.59	0.59	0.57	0.56	0.56	0.55	0.56	0.56	0.57	0.57	0.57	0.56	0.56	0.56	0.56	0.56	0.57	0.56	0.55	0.57	0.57	0.57
Sphingopyxis jiangsuensis XHP0097	0.53	0.56	0.54	0.56	0.56	0.54	0.54	0.54	0.55	0.56	0.54	0.54	0.55	0.55	0.55	0.55	0.55	0.55	0.54	0.54	0.55	0.55	0.55	0.58	0.59	0.59	0.57	0.59	0.59	0.57	0.56	0.56	0.56	0.56	0.56	0.58	0.57	0.58	0.58	0.57	0.57	0.56	0.56	0.57	0.57	0.57	0.58	0.57	0.57
Sphingopyxis terrae NBRC 15098	0.52	0.55	0.54	0.56	0.56	0.55	0.54	0.54	0.55	0.55	0.53	0.54	0.54	0.54	0.55	0.54	0.55	0.55	0.53	0.54	0.55	0.54	0.55	0.57	0.58	0.58	0.56	0.59	0.59	0.57	0.56	0.55	0.55	0.56	0.56	0.57	0.57	0.58	0.57	0.56	0.57	0.56	0.56	0.57	0.56	0.56	0.57	0.57	0.57
Sphingopyxis ummariensis DSM 24316	0.53	0.56	0.54	0.56	0.56	0.54	0.54	0.54	0.55	0.55	0.53	0.54	0.54	0.55	0.55	0.54	0.55	0.55	0.53	0.54	0.55	0.54	0.55	0.58	0.58	0.58	0.56	0.59	0.59	0.57	0.56	0.56	0.55	0.56	0.56	0.57	0.57	0.57	0.57	0.56	0.57	0.56	0.56	0.57	0.56	0.56	0.57	0.57	0.57
Sphingopyxis alaskensis RB2256	0.53	0.56	0.55	0.56	0.56	0.55	0.54	0.55	0.55	0.56	0.53	0.55	0.54	0.55	0.55	0.55	0.55	0.55	0.54	0.55	0.55	0.55	0.55	0.58	0.59	0.59	0.57	0.59	0.6	0.57	0.56	0.56	0.56	0.56	0.57	0.58	0.57	0.58	0.57	0.56	0.57	0.57	0.57	0.57	0.56	0.57	0.57	0.57	0.57
Sphingopyxis soli BL03	0.53	0.56	0.54	0.56	0.56	0.54	0.54	0.55	0.54	0.55	0.53	0.54	0.54	0.55	0.55	0.54	0.55	0.55	0.53	0.54	0.55	0.54	0.55	0.58	0.59	0.58	0.57	0.59	0.59	0.57	0.56	0.55	0.55	0.56	0.56	0.57	0.57	0.58	0.57	0.56	0.57	0.56	0.56	0.57	0.56	0.56	0.57	0.57	0.57
Sphingopyxis lindanitolerans WS5A3p	0.52	0.55	0.54	0.55	0.55	0.54	0.54	0.54	0.55	0.55	0.52	0.53	0.54	0.54	0.54	0.54	0.54	0.54	0.53	0.54	0.54	0.54	0.54	0.57	0.58	0.58	0.55	0.58	0.58	0.56	0.55	0.55	0.55	0.55	0.56	0.57	0.57	0.57	0.56	0.56	0.56	0.56	0.56	0.57	0.55	0.55	0.57	0.56	0.56
Sphingopyxis macrogoltabida 203	0.52	0.55	0.54	0.55	0.56	0.53	0.53	0.54	0.54	0.54	0.52	0.53	0.54	0.54	0.54	0.54	0.54	0.54	0.53	0.54	0.54	0.54	0.54	0.57	0.58	0.58	0.55	0.59	0.59	0.56	0.55	0.55	0.54	0.55	0.56	0.57	0.56	0.57	0.56	0.56	0.56	0.56	0.56	0.57	0.56	0.55	0.57	0.56	0.56
Sphingopyxis italica DSM 25229	0.52	0.56	0.55	0.56	0.56	0.54	0.54	0.54	0.55	0.55	0.53	0.54	0.54	0.54	0.54	0.54	0.55	0.55	0.53	0.53	0.54	0.54	0.55	0.57	0.59	0.58	0.57	0.59	0.59	0.57	0.56	0.55	0.55	0.55	0.56	0.57	0.57	0.57	0.56	0.56	0.56	0.56	0.56	0.57	0.56	0.56	0.57	0.57	0.57
Sphingopyxis panaciterrae DSM 27164	0.52	0.55	0.54	0.55	0.55	0.53	0.53	0.54	0.54	0.54	0.52	0.53	0.54	0.54	0.54	0.54	0.54	0.55	0.52	0.53	0.54	0.54	0.55	0.57	0.58	0.58	0.56	0.58	0.58	0.57	0.55	0.55	0.55	0.55	0.56	0.57	0.57	0.57	0.56	0.56	0.56	0.56	0.56	0.57	0.56	0.55	0.57	0.56	0.56
Sphingopyxis fribergensis Kp5.2	0.52	0.55	0.54	0.55	0.55	0.53	0.53	0.54	0.54	0.54	0.52	0.53	0.53	0.54	0.54	0.54	0.54	0.54	0.53	0.53	0.54	0.53	0.54	0.56	0.58	0.58	0.56	0.58	0.58	0.56	0.55	0.55	0.55	0.55	0.55	0.57	0.56	0.57	0.56	0.55	0.56	0.56	0.55	0.56	0.55	0.55	0.57	0.56	0.56
Sphingopyxis witflariensis DSM 14551	0.52	0.55	0.54	0.55	0.55	0.53	0.53	0.54	0.54	0.55	0.52	0.53	0.54	0.54	0.54	0.54	0.54	0.54	0.53	0.53	0.54	0.53	0.54	0.56	0.58	0.58	0.55	0.58	0.58	0.57	0.55	0.55	0.55	0.55	0.56	0.57	0.56	0.57	0.56	0.55	0.56	0.56	0.55	0.56	0.55	0.55	0.57	0.56	0.56
Sphingopyxis bauzanensis DSM 22271	0.52	0.55	0.54	0.55	0.55	0.53	0.53	0.53	0.53	0.55	0.52	0.53	0.53	0.54	0.54	0.54	0.54	0.54	0.53	0.54	0.55	0.54	0.54	0.57	0.58	0.58	0.56	0.58	0.58	0.56	0.55	0.55	0.55	0.56	0.56	0.57	0.56	0.57	0.56	0.55	0.56	0.55	0.56	0.56	0.55	0.55	0.57	0.56	0.56
Sphingopyxis solisilvae R366	0.52	0.56	0.54	0.56	0.56	0.54	0.54	0.54	0.54	0.55	0.53	0.54	0.54	0.55	0.55	0.54	0.55	0.55	0.53	0.54	0.55	0.54	0.55	0.57	0.58	0.58	0.56	0.59	0.59	0.57	0.56	0.55	0.55	0.56	0.56	0.57	0.57	0.58	0.57	0.56	0.57	0.56	0.56	0.57	0.56	0.56	0.57	0.56	0.56
Parasphingorhabdus flavimaris DSM 16223	0.51	0.54	0.53	0.54	0.54	0.52	0.52	0.52	0.52	0.53	0.52	0.52	0.53	0.53	0.53	0.53	0.53	0.53	0.52	0.52	0.53	0.53	0.53	0.56	0.57	0.57	0.54	0.57	0.58	0.56	0.55	0.55	0.54	0.55	0.55	0.55	0.55	0.56	0.55	0.54	0.55	0.54	0.54	0.55	0.55	0.54	0.56	0.55	0.55
Parasphingorhabdus marina DSM 22363	0.51	0.53	0.53	0.53	0.53	0.52	0.53	0.51	0.51	0.53	0.51	0.52	0.53	0.53	0.53	0.53	0.52	0.52	0.52	0.52	0.53	0.52	0.53	0.55	0.57	0.57	0.53	0.57	0.57	0.56	0.54	0.55	0.54	0.54	0.55	0.55	0.55	0.55	0.55	0.54	0.54	0.53	0.54	0.55	0.54	0.54	0.55	0.54	0.54
Parasphingorhabdus cellanae JHSY0214	0.51	0.53	0.53	0.53	0.53	0.52	0.52	0.51	0.52	0.53	0.51	0.52	0.53	0.53	0.53	0.53	0.52	0.53	0.51	0.52	0.53	0.52	0.53	0.55	0.57	0.57	0.54	0.57	0.57	0.56	0.55	0.55	0.54	0.54	0.55	0.55	0.54	0.55	0.55	0.53	0.54	0.53	0.54	0.55	0.54	0.53	0.55	0.54	0.54
Parasphingorhabdus litoris DSM 22379	0.51	0.53	0.53	0.53	0.53	0.52	0.52	0.51	0.51	0.53	0.51	0.52	0.53	0.53	0.53	0.53	0.52	0.52	0.51	0.52	0.53	0.52	0.53	0.55	0.57	0.57	0.54	0.57	0.57	0.56	0.55	0.55	0.54	0.54	0.55	0.55	0.55	0.55	0.54	0.53	0.55	0.53	0.54	0.54	0.54	0.54	0.55	0.55	0.55
Novosphingopyxis iocasae PB63	0.52	0.55	0.56	0.54	0.54	0.53	0.53	0.53	0.53	0.54	0.53	0.53	0.53	0.54	0.54	0.54	0.54	0.53	0.52	0.53	0.53	0.53	0.54	0.57	0.58	0.58	0.56	0.58	0.58	0.57	0.56	0.56	0.56	0.56	0.56	0.56	0.56	0.57	0.56	0.55	0.56	0.56	0.55	0.56	0.55	0.55	0.56	0.56	0.56
Novosphingopyxis baekryungensis DSM 16222	0.52	0.54	0.55	0.54	0.54	0.53	0.53	0.53	0.53	0.54	0.53	0.53	0.54	0.54	0.54	0.54	0.54	0.54	0.53	0.53	0.53	0.53	0.53	0.57	0.58	0.58	0.56	0.58	0.58	0.57	0.56	0.56	0.56	0.56	0.56	0.56	0.56	0.57	0.56	0.55	0.56	0.55	0.55	0.56	0.55	0.56	0.57	0.56	0.56
Sphingorhabdus lutea LPB0140	0.5	0.53	0.52	0.52	0.53	0.52	0.51	0.51	0.51	0.53	0.51	0.51	0.52	0.52	0.52	0.52	0.52	0.52	0.51	0.52	0.52	0.52	0.52	0.54	0.55	0.55	0.53	0.56	0.56	0.54	0.54	0.54	0.53	0.54	0.54	0.54	0.54	0.55	0.54	0.53	0.54	0.53	0.53	0.54	0.53	0.53	0.54	0.53	0.53
Sphingorhabdus arenilitoris CECT 8531	0.51	0.54	0.53	0.54	0.54	0.53	0.53	0.52	0.53	0.55	0.52	0.53	0.53	0.54	0.54	0.54	0.54	0.53	0.52	0.53	0.54	0.53	0.54	0.56	0.57	0.57	0.55	0.57	0.57	0.56	0.55	0.55	0.55	0.55	0.55	0.56	0.56	0.56	0.56	0.54	0.55	0.55	0.55	0.55	0.55	0.55	0.56	0.55	0.55
Sphingorhabdus pulchriflava GY_G	0.5168	0.5478	0.5314	0.5448	0.546	0.5346	0.5334	0.5256	0.5333	0.5539	0.5233	0.5298	0.5312	0.5377	0.5396	0.5371	0.537	0.5389	0.5267	0.5337	0.5473	0.5406	0.5479	0.5611	0.5721	0.5718	0.5511	0.582	0.583	0.5617	0.5511	0.551	0.5481	0.5499	0.554	0.5629	0.5629	0.567	0.5631	0.5521	0.5563	0.5484	0.5507	0.5609	0.5546	0.5469	0.5625	0.5547	0.5556
Sphingorhabdus rigui DSM 29050	0.53	0.56	0.54	0.56	0.56	0.55	0.54	0.54	0.54	0.56	0.54	0.54	0.54	0.55	0.55	0.55	0.55	0.55	0.54	0.54	0.55	0.55	0.56	0.57	0.59	0.58	0.57	0.59	0.59	0.56	0.56	0.55	0.55	0.56	0.56	0.57	0.57	0.57	0.57	0.56	0.57	0.56	0.56	0.56	0.56	0.56	0.57	0.56	0.56
Sphingorhabdus wooponensis 03SU3-P	0.53	0.56	0.55	0.56	0.56	0.55	0.54	0.54	0.54	0.56	0.54	0.55	0.55	0.55	0.55	0.55	0.55	0.55	0.54	0.55	0.56	0.55	0.56	0.58	0.59	0.59	0.57	0.59	0.59	0.56	0.56	0.56	0.56	0.56	0.56	0.57	0.57	0.58	0.58	0.57	0.57	0.56	0.56	0.57	0.56	0.56	0.57	0.57	0.57
Sphingorhabdus profundilacus IMCC26285	0.52	0.55	0.53	0.55	0.54	0.54	0.53	0.53	0.53	0.55	0.53	0.53	0.54	0.54	0.54	0.54	0.54	0.54	0.53	0.54	0.55	0.54	0.55	0.56	0.57	0.57	0.55	0.58	0.58	0.56	0.55	0.55	0.54	0.55	0.55	0.56	0.56	0.56	0.56	0.55	0.56	0.55	0.55	0.56	0.55	0.55	0.56	0.55	0.55
Sphingorhabdus lacus IMCC1753	0.52	0.54	0.53	0.55	0.54	0.54	0.53	0.52	0.53	0.55	0.53	0.53	0.53	0.54	0.54	0.54	0.54	0.53	0.53	0.53	0.54	0.54	0.55	0.56	0.58	0.57	0.55	0.58	0.58	0.56	0.55	0.55	0.54	0.55	0.55	0.56	0.56	0.56	0.56	0.55	0.56	0.55	0.55	0.56	0.55	0.55	0.56	0.55	0.55
Sphingorhabdus contaminans KCTC 32445	0.51	0.55	0.53	0.54	0.54	0.54	0.53	0.53	0.53	0.55	0.52	0.53	0.54	0.54	0.54	0.54	0.54	0.53	0.53	0.54	0.54	0.54	0.55	0.56	0.57	0.57	0.55	0.58	0.58	0.56	0.55	0.55	0.54	0.55	0.55	0.56	0.56	0.56	0.56	0.55	0.56	0.55	0.55	0.56	0.55	0.55	0.56	0.55	0.55
Blastomonas fulva T2	0.52	0.55	0.54	0.55	0.55	0.54	0.54	0.53	0.53	0.55	0.53	0.54	0.55	0.55	0.55	0.55	0.55	0.54	0.54	0.55	0.55	0.54	0.55	0.57	0.58	0.58	0.56	0.58	0.58	0.56	0.55	0.55	0.55	0.55	0.56	0.56	0.56	0.57	0.56	0.55	0.56	0.55	0.56	0.56	0.56	0.55	0.57	0.56	0.56
Blastomonas aquatica CGMCC 1.12851	0.52	0.55	0.54	0.55	0.55	0.54	0.54	0.53	0.53	0.55	0.53	0.54	0.55	0.55	0.55	0.55	0.55	0.54	0.54	0.54	0.55	0.54	0.55	0.57	0.58	0.58	0.56	0.58	0.58	0.56	0.55	0.55	0.55	0.55	0.56	0.56	0.56	0.56	0.56	0.55	0.56	0.55	0.56	0.56	0.55	0.55	0.57	0.55	0.56
Blastomonas natatoria DSM 3183	0.52	0.55	0.54	0.55	0.55	0.54	0.55	0.53	0.54	0.55	0.53	0.54	0.55	0.55	0.55	0.55	0.55	0.55	0.54	0.55	0.55	0.55	0.55	0.57	0.58	0.58	0.56	0.58	0.58	0.56	0.55	0.55	0.55	0.55	0.56	0.56	0.56	0.57	0.56	0.56	0.56	0.55	0.56	0.57	0.56	0.55	0.57	0.56	0.56
Blastomonas ursincola KR 99	0.52	0.55	0.54	0.55	0.55	0.55	0.54	0.54	0.54	0.55	0.53	0.55	0.55	0.55	0.55	0.55	0.55	0.54	0.54	0.54	0.55	0.55	0.55	0.57	0.59	0.58	0.56	0.59	0.59	0.56	0.55	0.55	0.55	0.55	0.56	0.57	0.56	0.57	0.56	0.56	0.56	0.55	0.56	0.57	0.56	0.55	0.57	0.56	0.56
Novosphingobium ipomoeae KCTC 42656	0.52	0.55	0.54	0.55	0.55	0.54	0.54	0.53	0.53	0.55	0.53	0.54	0.54	0.54	0.55	0.55	0.54	0.54	0.53	0.54	0.55	0.54	0.55	0.57	0.58	0.58	0.56	0.58	0.58	0.56	0.55	0.55	0.55	0.55	0.56	0.56	0.56	0.56	0.56	0.55	0.56	0.55	0.55	0.56	0.55	0.55	0.56	0.56	0.56
Novosphingobium sediminicola NBRC 106119	0.51	0.53	0.52	0.54	0.54	0.53	0.54	0.52	0.53	0.54	0.53	0.53	0.53	0.53	0.54	0.53	0.53	0.53	0.53	0.54	0.54	0.54	0.54	0.55	0.56	0.56	0.54	0.56	0.56	0.55	0.54	0.54	0.53	0.54	0.54	0.55	0.55	0.55	0.56	0.55	0.54	0.55	0.55	0.56	0.54	0.54	0.55	0.54	0.55
Novosphingobium arvoryzae KCTC 32422	0.5186	0.5497	0.5339	0.5462	0.5451	0.5334	0.5392	0.5305	0.5322	0.5514	0.5309	0.5311	0.5384	0.5384	0.5431	0.5399	0.5405	0.5388	0.5311	0.5482	0.548	0.548	0.548	0.5629	0.5725	0.5724	0.5537	0.573	0.5752	0.563	0.5525	0.5499	0.5446	0.5479	0.5569	0.5658	0.5618	0.5658	0.5607	0.5575	0.562	0.5578	0.5559	0.5651	0.5578	0.5522	0.5667	0.5558	0.5573
Novosphingobium kunmingense CGMCC 1.12274	0.52	0.54	0.54	0.55	0.55	0.53	0.54	0.53	0.53	0.54	0.53	0.53	0.53	0.54	0.54	0.54	0.54	0.54	0.52	0.54	0.55	0.54	0.55	0.56	0.56	0.57	0.55	0.57	0.57	0.56	0.55	0.55	0.54	0.55	0.55	0.56	0.56	0.56	0.56	0.55	0.55	0.55	0.55	0.56	0.55	0.55	0.56	0.55	0.55
Novosphingobium aquiterrae NCAIM B 02537	0.5127	0.5425	0.5314	0.5441	0.5426	0.5332	0.5382	0.5261	0.5291	0.5482	0.5295	0.5315	0.5359	0.5386	0.5415	0.5357	0.539	0.5378	0.5267	0.5394	0.5471	0.5454	0.544	0.5606	0.5639	0.5623	0.5451	0.5734	0.5744	0.5574	0.5462	0.5435	0.5437	0.5462	0.5494	0.5595	0.5599	0.5613	0.5627	0.5516	0.5559	0.5537	0.5508	0.5587	0.5506	0.5469	0.5623	0.5538	0.5562
Novosphingobium rosa NBRC 15208	0.51	0.52	0.52	0.52	0.52	0.51	0.51	0.52	0.52	0.52	0.52	0.51	0.51	0.52	0.52	0.52	0.52	0.52	0.51	0.51	0.52	0.51	0.52	0.54	0.54	0.54	0.54	0.55	0.55	0.54	0.53	0.52	0.52	0.53	0.53	0.54	0.54	0.54	0.53	0.54	0.53	0.54	0.53	0.54	0.54	0.53	0.54	0.54	0.53
Novosphingobium ovatum FSY-8	0.51	0.52	0.52	0.52	0.52	0.52	0.53	0.52	0.52	0.53	0.52	0.52	0.52	0.52	0.53	0.53	0.52	0.52	0.51	0.52	0.53	0.52	0.53	0.54	0.55	0.55	0.53	0.55	0.55	0.54	0.53	0.53	0.53	0.53	0.53	0.55	0.54	0.54	0.54	0.54	0.54	0.53	0.54	0.54	0.54	0.53	0.55	0.54	0.54
Novosphingobium humi KACC	0.51	0.52	0.51	0.52	0.52	0.52	0.52	0.52	0.52	0.52	0.52	0.52	0.52	0.52	0.52	0.52	0.52	0.52	0.51	0.51	0.52	0.52	0.52	0.54	0.54	0.54	0.54	0.55	0.55	0.54	0.53	0.53	0.52	0.53	0.53	0.54	0.54	0.54	0.54	0.54	0.53	0.53	0.53	0.54	0.54	0.53	0.54	0.53	0.53
Novosphingobium umbonatum FSY-9	0.5	0.52	0.52	0.52	0.52	0.52	0.52	0.51	0.52	0.53	0.52	0.52	0.52	0.52	0.53	0.53	0.52	0.52	0.51	0.52	0.53	0.53	0.53	0.54	0.54	0.54	0.53	0.55	0.55	0.54	0.53	0.53	0.53	0.53	0.54	0.54	0.54	0.54	0.54	0.54	0.53	0.53	0.54	0.54	0.54	0.53	0.54	0.54	0.53
Novosphingobium piscinae KCTC 42194	0.52	0.54	0.53	0.54	0.54	0.54	0.54	0.53	0.54	0.54	0.54	0.54	0.54	0.54	0.54	0.54	0.54	0.54	0.54	0.54	0.55	0.54	0.55	0.56	0.57	0.57	0.55	0.57	0.57	0.56	0.55	0.55	0.54	0.55	0.55	0.56	0.56	0.56	0.56	0.56	0.56	0.56	0.56	0.56	0.56	0.55	0.56	0.56	0.56
Novosphingobium aerophilum 4Y4	0.5117	0.5399	0.5302	0.5377	0.5379	0.5327	0.5346	0.5228	0.5275	0.5411	0.5352	0.533	0.5351	0.539	0.543	0.54	0.5401	0.5318	0.5329	0.5363	0.5381	0.538	0.5423	0.5596	0.5618	0.5587	0.5486	0.5684	0.5708	0.5546	0.544	0.5417	0.5416	0.543	0.549	0.5581	0.5547	0.5613	0.5587	0.5524	0.552	0.5511	0.5552	0.5584	0.5537	0.5441	0.56	0.5505	0.5518
Novosphingobium flavum NBRC 111647	0.52	0.53	0.52	0.53	0.53	0.53	0.53	0.52	0.52	0.53	0.52	0.52	0.53	0.53	0.53	0.53	0.53	0.53	0.52	0.52	0.53	0.53	0.53	0.56	0.56	0.56	0.55	0.56	0.57	0.55	0.54	0.54	0.54	0.54	0.55	0.55	0.55	0.56	0.55	0.55	0.55	0.55	0.54	0.55	0.55	0.54	0.55	0.55	0.55
Novosphingobium bradum KCTC 42984	0.52	0.54	0.53	0.54	0.54	0.53	0.54	0.53	0.53	0.54	0.53	0.53	0.53	0.54	0.54	0.54	0.54	0.53	0.53	0.54	0.54	0.53	0.54	0.56	0.57	0.57	0.55	0.57	0.57	0.56	0.55	0.54	0.54	0.54	0.55	0.56	0.56	0.56	0.56	0.55	0.56	0.56	0.55	0.56	0.55	0.55	0.56	0.55	0.56
Novosphingobium lentum NBRC 107847	0.51	0.54	0.52	0.54	0.54	0.53	0.53	0.54	0.53	0.54	0.53	0.54	0.53	0.53	0.54	0.53	0.53	0.53	0.52	0.53	0.54	0.53	0.54	0.56	0.56	0.56	0.54	0.56	0.57	0.55	0.54	0.54	0.54	0.54	0.55	0.56	0.56	0.56	0.55	0.55	0.55	0.55	0.55	0.55	0.55	0.54	0.56	0.55	0.55
Novosphingobium nitrogenifigens DSM 19370	0.51	0.53	0.53	0.53	0.53	0.52	0.53	0.53	0.52	0.53	0.52	0.52	0.52	0.52	0.52	0.52	0.53	0.53	0.52	0.52	0.54	0.53	0.53	0.55	0.56	0.55	0.54	0.56	0.56	0.55	0.54	0.54	0.54	0.54	0.54	0.55	0.55	0.55	0.55	0.55	0.55	0.54	0.54	0.55	0.54	0.54	0.55	0.55	0.55
Novosphingobium acidiphilum DSM 19966	0.5082	0.5299	0.5228	0.5329	0.5337	0.5309	0.534	0.5228	0.5253	0.5451	0.5331	0.5277	0.5319	0.5335	0.5384	0.5361	0.5331	0.5279	0.5266	0.5297	0.5426	0.5409	0.5384	0.5502	0.5516	0.55	0.5404	0.5583	0.5614	0.5454	0.5392	0.5319	0.5318	0.5373	0.543	0.5505	0.5473	0.5504	0.5498	0.5464	0.5466	0.544	0.5415	0.5547	0.5435	0.5373	0.5541	0.5403	0.5471
Novosphingobium rhizosphaerae CCM 8547	0.52	0.53	0.53	0.53	0.53	0.53	0.53	0.53	0.53	0.53	0.53	0.53	0.53	0.53	0.53	0.53	0.53	0.53	0.52	0.53	0.54	0.54	0.54	0.55	0.56	0.55	0.55	0.56	0.56	0.55	0.54	0.54	0.53	0.54	0.54	0.55	0.55	0.55	0.55	0.55	0.54	0.55	0.55	0.56	0.55	0.53	0.55	0.54	0.54
Novosphingobium capsulatum NBRC 12533	0.52	0.53	0.53	0.53	0.53	0.53	0.53	0.53	0.53	0.54	0.53	0.53	0.53	0.53	0.54	0.53	0.53	0.53	0.52	0.53	0.54	0.54	0.54	0.55	0.55	0.55	0.55	0.56	0.56	0.55	0.54	0.54	0.54	0.54	0.54	0.55	0.55	0.55	0.55	0.55	0.55	0.55	0.55	0.55	0.55	0.54	0.55	0.55	0.55
Novosphingobium pokkalii KCTC 42224	0.52	0.53	0.53	0.53	0.53	0.53	0.53	0.53	0.53	0.54	0.53	0.53	0.53	0.53	0.54	0.53	0.53	0.53	0.52	0.53	0.54	0.54	0.54	0.55	0.55	0.56	0.55	0.57	0.57	0.55	0.54	0.54	0.54	0.54	0.54	0.55	0.55	0.55	0.56	0.56	0.54	0.54	0.55	0.56	0.55	0.54	0.55	0.54	0.55
Novosphingobium fuchskuhlense FNE08-7	0.52	0.54	0.53	0.54	0.54	0.53	0.54	0.52	0.53	0.54	0.53	0.54	0.54	0.54	0.54	0.54	0.54	0.53	0.53	0.54	0.55	0.54	0.54	0.55	0.56	0.56	0.54	0.56	0.57	0.55	0.54	0.54	0.54	0.54	0.55	0.55	0.55	0.55	0.56	0.55	0.55	0.55	0.55	0.56	0.55	0.54	0.55	0.54	0.55
Novosphingobium percolationis c1	0.52	0.54	0.53	0.54	0.54	0.53	0.54	0.53	0.53	0.55	0.53	0.53	0.53	0.54	0.54	0.53	0.53	0.54	0.52	0.53	0.54	0.54	0.54	0.56	0.57	0.56	0.55	0.57	0.57	0.55	0.55	0.54	0.54	0.54	0.55	0.55	0.55	0.56	0.56	0.56	0.55	0.55	0.55	0.56	0.55	0.54	0.56	0.55	0.55
Novosphingobium huizhouense c7	0.52	0.54	0.53	0.54	0.54	0.53	0.54	0.53	0.53	0.55	0.54	0.53	0.53	0.54	0.54	0.54	0.54	0.54	0.53	0.53	0.55	0.54	0.54	0.56	0.57	0.57	0.55	0.57	0.57	0.56	0.55	0.54	0.54	0.55	0.55	0.56	0.56	0.56	0.56	0.56	0.56	0.55	0.55	0.56	0.56	0.55	0.56	0.55	0.56
Novosphingobium olei TW-4	0.52	0.54	0.53	0.53	0.54	0.53	0.53	0.52	0.53	0.54	0.53	0.53	0.53	0.53	0.53	0.53	0.53	0.53	0.52	0.53	0.54	0.53	0.54	0.56	0.56	0.56	0.55	0.57	0.57	0.55	0.54	0.54	0.54	0.54	0.55	0.55	0.55	0.56	0.55	0.55	0.55	0.55	0.55	0.56	0.55	0.54	0.56	0.55	0.55
Novosphingobium hassiacum DSM 14552	0.51	0.53	0.52	0.53	0.53	0.52	0.52	0.52	0.52	0.53	0.52	0.53	0.53	0.53	0.54	0.53	0.53	0.52	0.52	0.53	0.54	0.53	0.53	0.55	0.56	0.56	0.54	0.56	0.57	0.55	0.54	0.54	0.53	0.54	0.54	0.55	0.55	0.55	0.55	0.54	0.54	0.55	0.54	0.55	0.54	0.54	0.55	0.54	0.54
Novosphingobium meiothermophilum SYSU G00007	0.51	0.54	0.53	0.54	0.54	0.53	0.54	0.53	0.53	0.54	0.53	0.54	0.54	0.54	0.54	0.54	0.54	0.53	0.53	0.54	0.55	0.54	0.55	0.56	0.56	0.56	0.55	0.57	0.57	0.56	0.55	0.55	0.54	0.55	0.55	0.56	0.56	0.56	0.56	0.55	0.56	0.55	0.55	0.56	0.56	0.55	0.56	0.55	0.55
Novosphingobium aromaticivorans DSM 12444	0.5167	0.5433	0.5305	0.5388	0.5401	0.531	0.5317	0.5245	0.5328	0.5393	0.5263	0.5339	0.5334	0.5342	0.5386	0.535	0.5333	0.5328	0.5239	0.5324	0.5437	0.5398	0.5373	0.558	0.5643	0.5657	0.5492	0.571	0.5732	0.5551	0.542	0.5419	0.5419	0.5427	0.5479	0.5574	0.5582	0.56	0.556	0.551	0.5534	0.5516	0.5519	0.5562	0.5536	0.5434	0.5617	0.5486	0.5491
Novosphingobium taihuense CGMCC 1.3432	0.51	0.54	0.53	0.53	0.53	0.53	0.53	0.52	0.53	0.54	0.52	0.53	0.53	0.53	0.54	0.54	0.53	0.53	0.53	0.53	0.54	0.54	0.54	0.55	0.56	0.56	0.54	0.56	0.56	0.55	0.54	0.54	0.54	0.54	0.54	0.55	0.56	0.55	0.56	0.55	0.55	0.55	0.55	0.56	0.55	0.54	0.56	0.55	0.55
Novosphingobium jiangmenense 1Y9A	0.51	0.54	0.52	0.53	0.53	0.53	0.53	0.52	0.53	0.54	0.52	0.53	0.53	0.53	0.54	0.54	0.53	0.53	0.52	0.53	0.54	0.54	0.54	0.55	0.56	0.56	0.54	0.57	0.57	0.55	0.54	0.54	0.54	0.54	0.55	0.55	0.56	0.56	0.56	0.55	0.55	0.55	0.55	0.55	0.55	0.54	0.56	0.55	0.55
Novosphingobium subterraneum DSM 12447	0.51	0.54	0.53	0.53	0.54	0.53	0.53	0.53	0.53	0.53	0.53	0.53	0.53	0.53	0.54	0.53	0.53	0.53	0.52	0.53	0.54	0.53	0.54	0.55	0.56	0.56	0.54	0.57	0.57	0.55	0.54	0.54	0.54	0.54	0.55	0.55	0.55	0.56	0.55	0.54	0.55	0.55	0.55	0.55	0.55	0.54	0.55	0.55	0.54
Novosphingobium marinum CGMCC 1.12918	0.51	0.54	0.55	0.53	0.54	0.52	0.53	0.52	0.53	0.53	0.51	0.53	0.52	0.53	0.53	0.53	0.53	0.52	0.52	0.52	0.53	0.52	0.53	0.55	0.56	0.56	0.54	0.56	0.57	0.56	0.54	0.54	0.55	0.55	0.55	0.56	0.55	0.55	0.56	0.54	0.54	0.54	0.54	0.55	0.54	0.54	0.55	0.55	0.55
Novosphingobium aquimarinum M24A2M	0.5083	0.5314	0.5407	0.5311	0.535	0.5188	0.5207	0.5395	0.5203	0.5217	0.5105	0.5249	0.5168	0.5227	0.5255	0.5188	0.5185	0.5201	0.5099	0.5186	0.5244	0.5202	0.5254	0.5474	0.5594	0.5543	0.5357	0.5589	0.5606	0.5481	0.5344	0.5378	0.5368	0.5336	0.5419	0.5462	0.5435	0.5441	0.5377	0.5366	0.5365	0.538	0.5365	0.5407	0.5374	0.5317	0.5481	0.5413	0.5377
Novosphingobium fluoreni DSM 27568	0.51	0.53	0.53	0.53	0.54	0.52	0.52	0.53	0.52	0.53	0.52	0.53	0.52	0.53	0.53	0.53	0.53	0.53	0.52	0.52	0.53	0.52	0.53	0.55	0.56	0.56	0.55	0.57	0.56	0.55	0.54	0.54	0.54	0.54	0.54	0.55	0.55	0.55	0.55	0.55	0.55	0.54	0.54	0.55	0.55	0.54	0.55	0.55	0.55
Novosphingobium chloroacetimidivorans S00245	0.51	0.53	0.53	0.53	0.53	0.52	0.52	0.52	0.52	0.53	0.52	0.52	0.52	0.53	0.53	0.53	0.53	0.52	0.51	0.52	0.52	0.52	0.53	0.55	0.56	0.56	0.54	0.56	0.56	0.55	0.53	0.53	0.53	0.53	0.54	0.55	0.55	0.55	0.54	0.55	0.54	0.54	0.54	0.55	0.54	0.54	0.55	0.54	0.55
Novosphingobium colocasiae KCTC 32255	0.51	0.53	0.52	0.53	0.54	0.52	0.52	0.52	0.52	0.53	0.52	0.52	0.52	0.53	0.53	0.52	0.53	0.53	0.52	0.53	0.53	0.52	0.53	0.55	0.56	0.55	0.54	0.56	0.56	0.55	0.54	0.54	0.54	0.54	0.54	0.55	0.55	0.55	0.54	0.54	0.54	0.54	0.54	0.55	0.54	0.54	0.55	0.55	0.55
Novosphingobium endophyticum CGMCC 1.15095	0.51	0.53	0.53	0.54	0.54	0.52	0.53	0.52	0.52	0.53	0.51	0.52	0.52	0.53	0.53	0.53	0.52	0.52	0.52	0.52	0.53	0.52	0.53	0.55	0.55	0.56	0.54	0.56	0.56	0.55	0.54	0.54	0.53	0.54	0.54	0.55	0.55	0.55	0.54	0.54	0.54	0.54	0.54	0.55	0.54	0.54	0.55	0.54	0.54
Novosphingobium mathurense SM117	0.51	0.53	0.52	0.54	0.54	0.52	0.52	0.52	0.52	0.52	0.52	0.53	0.52	0.52	0.52	0.52	0.52	0.52	0.51	0.52	0.53	0.52	0.53	0.55	0.55	0.55	0.54	0.56	0.56	0.55	0.54	0.53	0.53	0.54	0.54	0.55	0.54	0.55	0.55	0.54	0.54	0.53	0.54	0.54	0.54	0.54	0.55	0.54	0.54
Novosphingobium pentaromativorans US6-1	0.51	0.53	0.53	0.53	0.53	0.52	0.52	0.52	0.52	0.53	0.52	0.51	0.52	0.52	0.53	0.52	0.52	0.52	0.52	0.52	0.52	0.53	0.53	0.55	0.55	0.56	0.54	0.56	0.56	0.55	0.54	0.54	0.54	0.54	0.54	0.55	0.55	0.55	0.54	0.54	0.54	0.54	0.54	0.55	0.54	0.54	0.55	0.54	0.54
Novosphingobium decolorationis 502str22	0.52	0.53	0.53	0.52	0.53	0.52	0.52	0.53	0.53	0.52	0.51	0.52	0.52	0.52	0.52	0.52	0.52	0.52	0.51	0.52	0.52	0.52	0.53	0.54	0.55	0.55	0.54	0.56	0.55	0.55	0.54	0.53	0.53	0.54	0.54	0.55	0.54	0.54	0.54	0.54	0.54	0.53	0.54	0.54	0.54	0.53	0.54	0.54	0.54
Novosphingobium aureum YJ-S2-02	0.51	0.53	0.53	0.52	0.52	0.51	0.52	0.52	0.52	0.52	0.51	0.52	0.52	0.52	0.53	0.53	0.52	0.52	0.51	0.52	0.53	0.52	0.53	0.54	0.55	0.55	0.54	0.56	0.56	0.55	0.54	0.54	0.53	0.54	0.54	0.54	0.54	0.55	0.54	0.54	0.54	0.53	0.53	0.54	0.54	0.53	0.54	0.54	0.54
Novosphingobium naphthalenivorans NBRC 102051	0.51	0.53	0.53	0.54	0.54	0.52	0.52	0.53	0.53	0.53	0.51	0.52	0.51	0.52	0.52	0.52	0.52	0.52	0.51	0.52	0.52	0.52	0.53	0.55	0.55	0.55	0.54	0.56	0.55	0.55	0.54	0.53	0.53	0.54	0.54	0.54	0.54	0.55	0.54	0.54	0.54	0.54	0.53	0.54	0.54	0.54	0.55	0.54	0.54
Novosphingobium indicum CGMCC 1.6784	0.51	0.52	0.53	0.53	0.53	0.51	0.52	0.52	0.52	0.52	0.51	0.52	0.51	0.52	0.52	0.52	0.52	0.52	0.51	0.52	0.52	0.52	0.52	0.54	0.55	0.55	0.53	0.56	0.56	0.55	0.54	0.53	0.53	0.53	0.54	0.54	0.54	0.55	0.54	0.54	0.54	0.53	0.53	0.54	0.54	0.53	0.55	0.54	0.54
Novosphingobium malaysiense MUSC 273	0.51	0.53	0.53	0.53	0.53	0.51	0.52	0.52	0.52	0.52	0.51	0.52	0.51	0.52	0.52	0.52	0.52	0.52	0.51	0.51	0.53	0.52	0.52	0.55	0.56	0.55	0.53	0.56	0.56	0.55	0.54	0.54	0.53	0.54	0.54	0.55	0.54	0.55	0.54	0.54	0.54	0.53	0.53	0.54	0.54	0.54	0.55	0.54	0.54
Novosphingobium clariflavum CICC 11035s	0.52	0.53	0.53	0.53	0.53	0.52	0.52	0.52	0.53	0.52	0.52	0.52	0.52	0.52	0.52	0.52	0.53	0.52	0.51	0.52	0.52	0.53	0.53	0.54	0.55	0.55	0.54	0.56	0.56	0.55	0.53	0.53	0.53	0.54	0.54	0.55	0.54	0.55	0.54	0.55	0.54	0.54	0.54	0.55	0.54	0.53	0.55	0.54	0.54
Novosphingobium lindaniclasticum LE124	0.52	0.53	0.53	0.53	0.53	0.52	0.52	0.52	0.53	0.52	0.52	0.52	0.52	0.52	0.53	0.52	0.53	0.53	0.51	0.52	0.52	0.52	0.53	0.55	0.55	0.55	0.55	0.56	0.56	0.55	0.53	0.54	0.53	0.53	0.54	0.55	0.55	0.55	0.54	0.54	0.54	0.54	0.54	0.54	0.55	0.54	0.55	0.54	0.54
Novosphingobium silvae FGD1	0.52	0.53	0.53	0.53	0.53	0.53	0.52	0.53	0.53	0.52	0.52	0.52	0.52	0.53	0.52	0.52	0.53	0.52	0.51	0.52	0.53	0.52	0.53	0.55	0.55	0.55	0.54	0.56	0.56	0.54	0.54	0.53	0.53	0.54	0.54	0.55	0.54	0.55	0.54	0.55	0.54	0.54	0.54	0.55	0.54	0.54	0.55	0.54	0.54
Novosphingobium barchaimii LL02	0.51	0.53	0.52	0.53	0.53	0.51	0.52	0.52	0.53	0.52	0.51	0.52	0.52	0.52	0.53	0.53	0.52	0.52	0.51	0.51	0.52	0.52	0.52	0.54	0.55	0.55	0.54	0.56	0.56	0.54	0.53	0.53	0.53	0.53	0.54	0.54	0.54	0.55	0.54	0.54	0.54	0.53	0.54	0.54	0.54	0.53	0.54	0.54	0.54
Novosphingobium soli CCM 7706	0.52	0.53	0.53	0.53	0.54	0.52	0.53	0.54	0.53	0.53	0.52	0.53	0.52	0.53	0.53	0.53	0.53	0.53	0.52	0.53	0.53	0.52	0.53	0.55	0.56	0.56	0.54	0.56	0.56	0.55	0.54	0.54	0.53	0.53	0.54	0.55	0.55	0.55	0.54	0.55	0.54	0.55	0.54	0.55	0.54	0.54	0.55	0.54	0.54
Novosphingobium panipatense CCM 7472	0.51	0.53	0.53	0.53	0.53	0.51	0.52	0.52	0.52	0.53	0.52	0.52	0.53	0.52	0.53	0.52	0.53	0.52	0.52	0.51	0.53	0.52	0.52	0.55	0.55	0.55	0.55	0.56	0.56	0.54	0.53	0.54	0.53	0.53	0.54	0.54	0.55	0.55	0.54	0.54	0.54	0.54	0.54	0.55	0.55	0.54	0.55	0.54	0.54
Novosphingobium gossypii CCM 8569	0.52	0.53	0.53	0.53	0.53	0.52	0.52	0.52	0.53	0.52	0.52	0.52	0.52	0.52	0.52	0.53	0.53	0.52	0.51	0.51	0.52	0.52	0.52	0.54	0.55	0.55	0.55	0.56	0.56	0.54	0.54	0.53	0.53	0.54	0.54	0.55	0.54	0.54	0.54	0.54	0.54	0.54	0.54	0.55	0.54	0.54	0.54	0.54	0.54
Novosphingobium guangzhouense SA925	0.51	0.53	0.53	0.53	0.53	0.51	0.52	0.52	0.53	0.52	0.51	0.52	0.52	0.52	0.52	0.52	0.52	0.52	0.51	0.51	0.52	0.52	0.52	0.54	0.55	0.55	0.54	0.56	0.56	0.54	0.53	0.53	0.53	0.54	0.54	0.54	0.54	0.54	0.54	0.54	0.54	0.54	0.53	0.54	0.54	0.53	0.55	0.54	0.54
Novosphingobium resinovorum VKM B-1172	0.52	0.53	0.52	0.53	0.54	0.52	0.52	0.52	0.53	0.53	0.52	0.52	0.52	0.52	0.53	0.53	0.52	0.53	0.51	0.52	0.53	0.52	0.53	0.55	0.55	0.55	0.54	0.56	0.56	0.55	0.54	0.54	0.54	0.54	0.54	0.55	0.54	0.55	0.55	0.55	0.54	0.54	0.54	0.55	0.55	0.54	0.55	0.54	0.54
Croceicoccus hydrothermalis JLT1	0.51	0.53	0.56	0.53	0.54	0.52	0.52	0.52	0.52	0.53	0.52	0.52	0.52	0.53	0.53	0.52	0.53	0.52	0.52	0.52	0.53	0.53	0.53	0.55	0.56	0.56	0.54	0.56	0.56	0.56	0.54	0.54	0.55	0.54	0.55	0.55	0.55	0.55	0.55	0.54	0.54	0.54	0.54	0.55	0.54	0.54	0.55	0.54	0.54
Croceicoccus mobilis Ery22	0.51	0.53	0.53	0.52	0.53	0.51	0.52	0.51	0.51	0.52	0.51	0.51	0.51	0.52	0.52	0.52	0.52	0.52	0.51	0.52	0.52	0.52	0.52	0.54	0.55	0.55	0.53	0.55	0.56	0.55	0.54	0.54	0.54	0.54	0.54	0.55	0.54	0.55	0.54	0.53	0.54	0.53	0.54	0.54	0.54	0.53	0.55	0.54	0.54
Croceicoccus marinus E4A9	0.51	0.53	0.54	0.53	0.54	0.52	0.52	0.52	0.52	0.52	0.52	0.52	0.52	0.52	0.53	0.52	0.53	0.52	0.52	0.52	0.52	0.52	0.53	0.55	0.55	0.55	0.54	0.56	0.56	0.55	0.54	0.54	0.54	0.54	0.55	0.55	0.55	0.55	0.54	0.54	0.54	0.54	0.54	0.54	0.54	0.54	0.55	0.55	0.54
Croceicoccus ponticola GM-16	0.51	0.53	0.53	0.54	0.54	0.52	0.53	0.52	0.52	0.53	0.52	0.53	0.53	0.53	0.53	0.53	0.53	0.53	0.52	0.52	0.53	0.53	0.53	0.55	0.56	0.56	0.54	0.56	0.56	0.55	0.54	0.54	0.54	0.54	0.54	0.55	0.55	0.55	0.55	0.54	0.54	0.54	0.54	0.55	0.54	0.54	0.55	0.55	0.54
Croceicoccus naphthovorans PQ-2	0.52	0.54	0.54	0.54	0.54	0.53	0.52	0.53	0.53	0.52	0.51	0.53	0.52	0.52	0.53	0.52	0.52	0.53	0.52	0.52	0.53	0.52	0.53	0.55	0.56	0.56	0.54	0.56	0.56	0.55	0.54	0.54	0.54	0.54	0.55	0.55	0.55	0.55	0.54	0.53	0.54	0.54	0.54	0.54	0.54	0.53	0.55	0.54	0.54
Croceicoccus bisphenolivorans H4	0.51	0.53	0.54	0.53	0.54	0.52	0.53	0.52	0.52	0.53	0.51	0.52	0.52	0.53	0.53	0.52	0.53	0.52	0.52	0.52	0.53	0.52	0.53	0.55	0.56	0.56	0.54	0.56	0.56	0.55	0.54	0.54	0.54	0.54	0.55	0.55	0.55	0.55	0.54	0.54	0.54	0.54	0.54	0.55	0.54	0.54	0.55	0.55	0.54
Croceicoccus sediminis S2-4-2	0.51	0.53	0.53	0.53	0.54	0.52	0.52	0.52	0.51	0.52	0.51	0.52	0.52	0.52	0.53	0.52	0.52	0.52	0.51	0.52	0.53	0.52	0.53	0.55	0.56	0.55	0.53	0.56	0.56	0.55	0.54	0.54	0.54	0.54	0.55	0.55	0.55	0.55	0.55	0.54	0.54	0.54	0.54	0.54	0.54	0.54	0.55	0.54	0.54
Croceicoccus pelagius Ery9	0.51	0.53	0.54	0.54	0.54	0.52	0.52	0.52	0.52	0.53	0.51	0.53	0.52	0.53	0.53	0.53	0.52	0.52	0.52	0.52	0.53	0.53	0.53	0.55	0.56	0.56	0.54	0.56	0.56	0.55	0.54	0.55	0.54	0.54	0.55	0.55	0.55	0.55	0.55	0.54	0.54	0.54	0.54	0.55	0.54	0.54	0.55	0.55	0.54
Croceicoccus gelatinilyticus 1NDH52	0.51	0.53	0.54	0.53	0.53	0.51	0.52	0.51	0.52	0.52	0.51	0.52	0.52	0.52	0.52	0.52	0.52	0.52	0.51	0.51	0.52	0.52	0.52	0.54	0.55	0.55	0.53	0.56	0.56	0.55	0.54	0.54	0.54	0.54	0.54	0.55	0.54	0.55	0.54	0.53	0.54	0.53	0.53	0.54	0.54	0.54	0.55	0.54	0.54
Altererythrobacter fulvus KACC 19119	0.51	0.53	0.53	0.54	0.54	0.52	0.52	0.52	0.52	0.53	0.52	0.52	0.52	0.53	0.53	0.53	0.52	0.52	0.52	0.52	0.53	0.53	0.53	0.55	0.56	0.56	0.54	0.57	0.57	0.55	0.54	0.54	0.54	0.54	0.55	0.55	0.55	0.56	0.55	0.55	0.55	0.55	0.55	0.55	0.55	0.54	0.56	0.55	0.55
Caenibius tardaugens NBRC 16725	0.52	0.54	0.53	0.54	0.55	0.52	0.53	0.54	0.53	0.53	0.51	0.53	0.52	0.53	0.53	0.52	0.53	0.52	0.52	0.52	0.53	0.52	0.53	0.55	0.56	0.56	0.54	0.57	0.57	0.55	0.54	0.54	0.54	0.54	0.55	0.56	0.55	0.55	0.55	0.54	0.55	0.55	0.54	0.55	0.54	0.54	0.55	0.55	0.55
Croceicoccus estronivorus MH-B5	0.52	0.54	0.53	0.54	0.54	0.52	0.53	0.53	0.53	0.53	0.51	0.52	0.52	0.53	0.53	0.52	0.52	0.52	0.52	0.52	0.53	0.52	0.53	0.56	0.56	0.56	0.54	0.57	0.56	0.56	0.54	0.54	0.54	0.55	0.55	0.55	0.55	0.55	0.55	0.54	0.55	0.54	0.54	0.55	0.54	0.54	0.55	0.55	0.55
Altericroceibacterium endophyticum LMG 29518	0.51	0.52	0.53	0.53	0.53	0.51	0.51	0.52	0.52	0.52	0.51	0.51	0.52	0.52	0.52	0.52	0.51	0.51	0.51	0.51	0.52	0.52	0.52	0.55	0.55	0.55	0.53	0.56	0.55	0.55	0.54	0.54	0.53	0.54	0.54	0.54	0.54	0.54	0.54	0.54	0.54	0.53	0.53	0.54	0.54	0.54	0.54	0.54	0.54
Altericroceibacterium spongiae HN-Y73	0.51	0.52	0.53	0.52	0.53	0.51	0.52	0.52	0.52	0.52	0.51	0.51	0.52	0.52	0.52	0.52	0.51	0.51	0.51	0.51	0.52	0.52	0.52	0.54	0.55	0.55	0.53	0.55	0.55	0.55	0.53	0.54	0.53	0.53	0.54	0.54	0.54	0.55	0.54	0.53	0.54	0.53	0.53	0.54	0.54	0.53	0.54	0.53	0.53
Altericroceibacterium indicum DSM 18604	0.51	0.53	0.53	0.53	0.53	0.51	0.51	0.52	0.52	0.52	0.51	0.51	0.52	0.52	0.52	0.52	0.52	0.52	0.51	0.51	0.52	0.52	0.52	0.55	0.55	0.55	0.54	0.56	0.56	0.55	0.54	0.54	0.54	0.54	0.54	0.55	0.54	0.54	0.54	0.54	0.54	0.53	0.54	0.54	0.54	0.54	0.55	0.54	0.54
Croceibacterium salegens MCCC 1K01500	0.51	0.52	0.53	0.53	0.53	0.52	0.52	0.51	0.52	0.52	0.51	0.51	0.52	0.52	0.53	0.52	0.52	0.51	0.51	0.51	0.53	0.53	0.52	0.55	0.55	0.55	0.54	0.56	0.56	0.55	0.54	0.54	0.54	0.54	0.55	0.55	0.55	0.55	0.55	0.54	0.54	0.54	0.54	0.54	0.55	0.54	0.55	0.55	0.54
Croceibacterium soli MCCC 1K02066	0.52	0.54	0.54	0.54	0.54	0.53	0.53	0.52	0.52	0.53	0.52	0.52	0.53	0.54	0.54	0.54	0.53	0.53	0.52	0.53	0.54	0.53	0.53	0.56	0.57	0.57	0.56	0.57	0.57	0.56	0.55	0.55	0.55	0.55	0.56	0.56	0.56	0.56	0.56	0.55	0.56	0.55	0.55	0.56	0.56	0.55	0.56	0.56	0.56
Croceibacterium atlanticum 26DY36	0.51	0.53	0.54	0.53	0.54	0.52	0.52	0.52	0.52	0.52	0.51	0.52	0.52	0.52	0.53	0.52	0.52	0.52	0.52	0.51	0.52	0.52	0.52	0.55	0.56	0.56	0.54	0.56	0.56	0.55	0.54	0.54	0.54	0.54	0.55	0.55	0.55	0.55	0.54	0.54	0.54	0.54	0.54	0.55	0.55	0.54	0.55	0.54	0.54
Croceibacterium xixiisoli S36	0.51	0.53	0.52	0.53	0.53	0.52	0.52	0.53	0.52	0.52	0.51	0.51	0.52	0.52	0.52	0.52	0.52	0.52	0.51	0.51	0.52	0.52	0.52	0.54	0.55	0.55	0.54	0.56	0.56	0.55	0.54	0.53	0.53	0.54	0.54	0.55	0.55	0.55	0.54	0.54	0.54	0.53	0.54	0.54	0.54	0.53	0.55	0.54	0.54
Croceibacterium mercuriale Coronado	0.52	0.54	0.54	0.53	0.53	0.52	0.53	0.52	0.52	0.53	0.53	0.52	0.53	0.53	0.53	0.53	0.54	0.53	0.52	0.52	0.53	0.53	0.53	0.55	0.56	0.55	0.56	0.56	0.56	0.55	0.54	0.54	0.54	0.54	0.55	0.55	0.55	0.55	0.54	0.55	0.55	0.54	0.55	0.55	0.55	0.54	0.55	0.54	0.55
Croceibacterium ferulae SX2RGS8	0.52	0.53	0.53	0.53	0.53	0.52	0.53	0.53	0.52	0.53	0.53	0.52	0.53	0.53	0.53	0.53	0.54	0.53	0.52	0.52	0.53	0.52	0.53	0.55	0.56	0.56	0.56	0.56	0.56	0.55	0.54	0.54	0.54	0.54	0.55	0.55	0.55	0.55	0.55	0.55	0.55	0.54	0.55	0.55	0.55	0.54	0.55	0.55	0.55
Paraurantiacibacter namhicola JCM 16345	0.51	0.53	0.54	0.54	0.54	0.53	0.53	0.52	0.52	0.53	0.52	0.52	0.53	0.53	0.53	0.53	0.52	0.52	0.52	0.53	0.53	0.53	0.53	0.56	0.56	0.56	0.54	0.56	0.56	0.56	0.55	0.55	0.55	0.55	0.56	0.55	0.55	0.56	0.55	0.54	0.55	0.54	0.54	0.55	0.54	0.54	0.55	0.55	0.54
Alteraurantiacibacter aestuarii JCM 16339	0.51	0.53	0.52	0.53	0.53	0.52	0.52	0.51	0.51	0.52	0.51	0.52	0.52	0.52	0.53	0.52	0.52	0.52	0.51	0.52	0.53	0.53	0.52	0.55	0.55	0.55	0.53	0.56	0.56	0.55	0.54	0.54	0.53	0.54	0.54	0.54	0.55	0.55	0.54	0.53	0.54	0.54	0.54	0.54	0.54	0.54	0.55	0.54	0.54
Alteraurantiacibacter aquimixticola SSKS-13	0.5	0.53	0.52	0.52	0.53	0.51	0.51	0.51	0.51	0.52	0.51	0.51	0.51	0.52	0.52	0.52	0.51	0.51	0.51	0.51	0.52	0.52	0.52	0.54	0.55	0.55	0.53	0.55	0.56	0.55	0.54	0.54	0.54	0.54	0.55	0.54	0.54	0.54	0.54	0.53	0.54	0.53	0.53	0.54	0.54	0.53	0.54	0.54	0.54
Alteraurantiacibacter buctensis M0322	0.5	0.52	0.52	0.52	0.53	0.51	0.52	0.51	0.52	0.52	0.51	0.51	0.52	0.52	0.53	0.52	0.52	0.52	0.51	0.52	0.53	0.52	0.53	0.54	0.55	0.55	0.53	0.55	0.55	0.55	0.53	0.54	0.53	0.54	0.54	0.55	0.54	0.55	0.54	0.54	0.54	0.53	0.54	0.54	0.54	0.53	0.54	0.54	0.54
Altererythrobacter palmitatis KCTC 52607	0.51	0.53	0.52	0.53	0.54	0.52	0.53	0.52	0.53	0.53	0.52	0.52	0.52	0.52	0.53	0.52	0.52	0.52	0.51	0.53	0.53	0.53	0.53	0.55	0.56	0.55	0.54	0.55	0.56	0.55	0.54	0.54	0.54	0.54	0.55	0.55	0.55	0.55	0.55	0.54	0.55	0.54	0.54	0.55	0.54	0.54	0.55	0.54	0.54
Altererythrobacter lauratis KCTC 52606	0.51	0.53	0.52	0.53	0.54	0.52	0.53	0.52	0.52	0.53	0.52	0.52	0.52	0.52	0.53	0.52	0.52	0.52	0.52	0.53	0.53	0.53	0.53	0.55	0.55	0.55	0.54	0.56	0.56	0.55	0.54	0.54	0.54	0.54	0.55	0.55	0.55	0.55	0.55	0.54	0.54	0.54	0.54	0.55	0.54	0.54	0.55	0.54	0.54
Aurantiacibacter suaedae GH3-15	0.5	0.52	0.53	0.52	0.52	0.51	0.51	0.51	0.51	0.52	0.51	0.51	0.52	0.52	0.53	0.52	0.52	0.52	0.51	0.51	0.52	0.52	0.52	0.54	0.55	0.55	0.53	0.55	0.55	0.55	0.54	0.54	0.54	0.54	0.55	0.54	0.54	0.54	0.54	0.53	0.53	0.53	0.54	0.54	0.54	0.53	0.54	0.54	0.54
Aurantiacibacter xanthus CCTCC AB 2015396	0.51	0.52	0.53	0.52	0.53	0.51	0.51	0.52	0.51	0.52	0.51	0.51	0.51	0.52	0.52	0.52	0.52	0.51	0.51	0.51	0.52	0.52	0.52	0.54	0.55	0.55	0.53	0.55	0.55	0.55	0.54	0.53	0.53	0.53	0.54	0.54	0.54	0.54	0.53	0.53	0.53	0.53	0.53	0.54	0.54	0.53	0.54	0.54	0.54
Aurantiacibacter spongiae HN-E23	0.51	0.54	0.54	0.53	0.53	0.52	0.53	0.52	0.52	0.53	0.52	0.52	0.53	0.53	0.53	0.53	0.53	0.53	0.52	0.52	0.53	0.52	0.52	0.55	0.56	0.56	0.54	0.56	0.56	0.56	0.55	0.55	0.55	0.55	0.55	0.55	0.55	0.55	0.54	0.54	0.54	0.54	0.54	0.54	0.54	0.54	0.55	0.55	0.54
Aurantiacibacter gangjinensis CGMCC 1.15024	0.51	0.53	0.53	0.53	0.53	0.52	0.52	0.52	0.51	0.52	0.51	0.52	0.52	0.53	0.53	0.52	0.52	0.52	0.51	0.53	0.52	0.52	0.52	0.55	0.55	0.55	0.54	0.56	0.56	0.55	0.55	0.55	0.54	0.55	0.55	0.54	0.54	0.55	0.54	0.54	0.54	0.54	0.54	0.54	0.54	0.54	0.55	0.54	0.54
Aurantiacibacter rhizosphaerae GH3-10	0.5	0.52	0.52	0.53	0.52	0.51	0.51	0.51	0.5	0.51	0.51	0.51	0.51	0.51	0.52	0.52	0.51	0.51	0.51	0.51	0.52	0.51	0.51	0.54	0.55	0.55	0.53	0.55	0.55	0.55	0.54	0.54	0.54	0.54	0.54	0.54	0.54	0.54	0.54	0.53	0.53	0.53	0.53	0.54	0.53	0.53	0.54	0.54	0.54
Aurantiacibacter odishensis KCTC 23981	0.5	0.52	0.53	0.52	0.53	0.52	0.52	0.51	0.51	0.52	0.51	0.52	0.52	0.52	0.53	0.52	0.52	0.52	0.51	0.51	0.53	0.52	0.52	0.54	0.55	0.55	0.53	0.56	0.56	0.56	0.55	0.55	0.54	0.55	0.55	0.55	0.54	0.55	0.55	0.54	0.54	0.54	0.54	0.55	0.54	0.54	0.55	0.54	0.54
Aurantiacibacter zhengii V18	0.5	0.52	0.54	0.52	0.53	0.51	0.52	0.51	0.51	0.52	0.51	0.51	0.51	0.52	0.52	0.52	0.52	0.51	0.51	0.51	0.52	0.51	0.52	0.54	0.55	0.55	0.53	0.55	0.56	0.55	0.55	0.55	0.55	0.55	0.55	0.54	0.54	0.55	0.54	0.54	0.54	0.53	0.54	0.54	0.54	0.53	0.54	0.54	0.54
Aurantiacibacter arachoides RC4-10-4	0.51	0.53	0.54	0.53	0.53	0.52	0.52	0.52	0.52	0.53	0.52	0.53	0.53	0.53	0.53	0.53	0.53	0.52	0.52	0.52	0.53	0.52	0.53	0.55	0.56	0.56	0.54	0.56	0.56	0.56	0.54	0.55	0.55	0.55	0.55	0.55	0.55	0.55	0.55	0.55	0.55	0.55	0.55	0.55	0.54	0.54	0.55	0.55	0.55
Aurantiacibacter luteus KA37	0.51	0.53	0.53	0.53	0.53	0.52	0.53	0.52	0.52	0.53	0.52	0.52	0.53	0.53	0.53	0.53	0.53	0.53	0.52	0.52	0.53	0.53	0.53	0.56	0.56	0.56	0.55	0.56	0.57	0.55	0.55	0.55	0.55	0.55	0.56	0.55	0.55	0.55	0.55	0.55	0.55	0.55	0.55	0.55	0.55	0.54	0.55	0.55	0.55
Aurantiacibacter aquimixticola JSSK-14	0.51	0.53	0.53	0.53	0.53	0.53	0.53	0.52	0.52	0.53	0.51	0.52	0.52	0.53	0.53	0.53	0.52	0.52	0.52	0.53	0.53	0.52	0.52	0.55	0.56	0.56	0.54	0.56	0.56	0.56	0.55	0.55	0.55	0.55	0.55	0.55	0.55	0.55	0.55	0.54	0.54	0.54	0.54	0.55	0.54	0.54	0.55	0.55	0.54
Aurantiacibacter sediminis JGD-13	0.51	0.53	0.53	0.53	0.53	0.52	0.52	0.51	0.52	0.53	0.51	0.52	0.52	0.53	0.53	0.52	0.52	0.52	0.51	0.52	0.52	0.52	0.52	0.55	0.55	0.55	0.54	0.56	0.56	0.55	0.54	0.55	0.54	0.54	0.55	0.54	0.54	0.54	0.54	0.53	0.54	0.54	0.54	0.54	0.54	0.54	0.54	0.54	0.54
Aurantiacibacter atlanticus s21-N3	0.5	0.52	0.53	0.52	0.53	0.51	0.51	0.51	0.51	0.52	0.51	0.51	0.51	0.52	0.52	0.51	0.51	0.51	0.51	0.51	0.52	0.51	0.52	0.54	0.55	0.55	0.53	0.55	0.55	0.55	0.54	0.54	0.54	0.54	0.54	0.54	0.54	0.54	0.53	0.53	0.53	0.53	0.53	0.54	0.54	0.53	0.54	0.54	0.54
Aurantiacibacter marinus KCTC 23554	0.51	0.53	0.53	0.53	0.53	0.52	0.52	0.52	0.52	0.52	0.51	0.52	0.52	0.53	0.53	0.52	0.52	0.52	0.52	0.52	0.53	0.52	0.53	0.55	0.55	0.55	0.54	0.56	0.56	0.55	0.54	0.54	0.54	0.54	0.54	0.54	0.54	0.54	0.55	0.54	0.54	0.53	0.54	0.55	0.54	0.54	0.55	0.54	0.54
Blastomonas marina CGMCC 1.15297	0.51	0.54	0.54	0.54	0.54	0.52	0.53	0.52	0.52	0.53	0.51	0.52	0.53	0.53	0.53	0.53	0.52	0.52	0.51	0.52	0.52	0.52	0.53	0.56	0.56	0.56	0.55	0.56	0.56	0.56	0.56	0.55	0.56	0.56	0.56	0.56	0.55	0.56	0.55	0.55	0.55	0.55	0.55	0.55	0.55	0.55	0.55	0.55	0.55
Alteriqipengyuania halimionae LMG 29519	0.51	0.53	0.53	0.53	0.53	0.52	0.52	0.51	0.51	0.52	0.51	0.52	0.52	0.52	0.53	0.52	0.52	0.52	0.51	0.52	0.52	0.52	0.52	0.55	0.56	0.56	0.54	0.56	0.56	0.56	0.55	0.55	0.55	0.55	0.56	0.55	0.55	0.55	0.55	0.54	0.55	0.55	0.54	0.55	0.54	0.54	0.55	0.55	0.55
Pelagerythrobacter rhizovicinus AY-3R	0.52	0.55	0.55	0.54	0.54	0.53	0.53	0.53	0.53	0.54	0.52	0.53	0.53	0.54	0.54	0.54	0.53	0.53	0.52	0.53	0.54	0.53	0.53	0.56	0.57	0.58	0.56	0.57	0.58	0.57	0.55	0.56	0.55	0.56	0.56	0.57	0.56	0.57	0.56	0.55	0.56	0.55	0.55	0.56	0.56	0.56	0.56	0.56	0.56
Pelagerythrobacter aerophilus Ery1	0.52	0.54	0.55	0.54	0.55	0.53	0.53	0.53	0.53	0.53	0.52	0.53	0.53	0.53	0.54	0.53	0.53	0.53	0.52	0.53	0.53	0.53	0.53	0.56	0.57	0.57	0.55	0.57	0.57	0.56	0.55	0.55	0.55	0.55	0.56	0.56	0.56	0.56	0.55	0.55	0.55	0.55	0.55	0.56	0.55	0.55	0.56	0.56	0.55
Pelagerythrobacter marinus H32	0.52	0.55	0.55	0.54	0.55	0.54	0.54	0.53	0.53	0.54	0.53	0.53	0.54	0.54	0.54	0.54	0.54	0.53	0.53	0.54	0.54	0.53	0.54	0.57	0.57	0.57	0.55	0.57	0.57	0.57	0.56	0.56	0.56	0.56	0.57	0.57	0.56	0.56	0.56	0.55	0.56	0.56	0.55	0.56	0.55	0.55	0.56	0.56	0.56
Pelagerythrobacter marensis KCTC 22370	0.52	0.54	0.55	0.54	0.54	0.53	0.53	0.53	0.53	0.54	0.52	0.53	0.53	0.54	0.54	0.54	0.53	0.53	0.52	0.53	0.54	0.53	0.53	0.56	0.57	0.57	0.55	0.57	0.57	0.57	0.55	0.56	0.55	0.56	0.56	0.56	0.56	0.56	0.55	0.55	0.56	0.55	0.55	0.56	0.55	0.55	0.56	0.56	0.55
Tsuneonella mangrovi C9-11	0.52	0.54	0.54	0.54	0.54	0.53	0.54	0.53	0.53	0.54	0.53	0.53	0.53	0.54	0.54	0.53	0.53	0.53	0.53	0.53	0.54	0.53	0.53	0.56	0.57	0.57	0.55	0.57	0.57	0.56	0.55	0.55	0.55	0.55	0.56	0.56	0.56	0.56	0.56	0.55	0.55	0.55	0.55	0.56	0.55	0.55	0.56	0.55	0.55
Tsuneonella flava MS1-4	0.52	0.54	0.54	0.54	0.54	0.53	0.53	0.53	0.53	0.54	0.52	0.53	0.53	0.53	0.53	0.53	0.53	0.53	0.53	0.53	0.53	0.53	0.53	0.56	0.56	0.56	0.54	0.56	0.57	0.56	0.55	0.55	0.55	0.55	0.55	0.56	0.55	0.56	0.55	0.55	0.55	0.54	0.55	0.55	0.55	0.55	0.56	0.55	0.55
Tsuneonella suprasediminis Ery12	0.52	0.54	0.54	0.54	0.54	0.53	0.53	0.53	0.52	0.53	0.52	0.53	0.53	0.53	0.53	0.53	0.53	0.53	0.53	0.53	0.53	0.53	0.53	0.55	0.56	0.56	0.54	0.57	0.57	0.56	0.54	0.55	0.55	0.55	0.55	0.56	0.55	0.56	0.55	0.55	0.55	0.55	0.54	0.55	0.54	0.55	0.56	0.55	0.55
Tsuneonella amylolytica NS1	0.51	0.55	0.54	0.54	0.54	0.53	0.54	0.53	0.53	0.54	0.53	0.53	0.54	0.54	0.54	0.54	0.54	0.54	0.53	0.53	0.54	0.54	0.54	0.57	0.57	0.57	0.55	0.57	0.57	0.56	0.55	0.55	0.55	0.55	0.56	0.56	0.56	0.56	0.56	0.55	0.55	0.56	0.56	0.56	0.55	0.55	0.56	0.56	0.55
Tsuneonella troitsensis JCM 17037	0.51	0.54	0.54	0.54	0.54	0.54	0.54	0.53	0.53	0.54	0.53	0.53	0.53	0.54	0.54	0.54	0.54	0.54	0.53	0.53	0.54	0.54	0.54	0.56	0.57	0.57	0.55	0.57	0.57	0.56	0.55	0.55	0.55	0.55	0.56	0.57	0.56	0.57	0.56	0.55	0.56	0.55	0.56	0.56	0.55	0.55	0.56	0.56	0.56
Tsuneonella dongtanensis KCTC 22672	0.51	0.54	0.54	0.54	0.54	0.53	0.54	0.52	0.52	0.54	0.52	0.52	0.53	0.54	0.54	0.54	0.53	0.53	0.53	0.54	0.54	0.54	0.54	0.56	0.57	0.57	0.55	0.56	0.57	0.56	0.55	0.55	0.55	0.55	0.56	0.56	0.55	0.56	0.55	0.55	0.55	0.55	0.55	0.56	0.55	0.55	0.56	0.55	0.55
Tsuneonella aeria 100921-2	0.52	0.55	0.54	0.54	0.54	0.53	0.54	0.53	0.53	0.54	0.53	0.53	0.53	0.54	0.54	0.54	0.54	0.53	0.53	0.53	0.54	0.54	0.54	0.56	0.57	0.57	0.55	0.57	0.57	0.56	0.55	0.55	0.55	0.55	0.55	0.57	0.56	0.56	0.56	0.55	0.56	0.55	0.55	0.56	0.55	0.56	0.56	0.56	0.56
Tsuneonella rigui KCTC 42620	0.52	0.55	0.54	0.54	0.54	0.53	0.54	0.53	0.53	0.54	0.52	0.53	0.53	0.54	0.54	0.54	0.53	0.53	0.53	0.53	0.54	0.54	0.54	0.57	0.57	0.57	0.55	0.58	0.57	0.56	0.55	0.55	0.55	0.55	0.56	0.56	0.56	0.56	0.56	0.55	0.55	0.55	0.55	0.56	0.55	0.55	0.56	0.56	0.56
Tsuneonella deserti CGMCC 1.15959	0.52	0.55	0.54	0.55	0.55	0.54	0.54	0.53	0.54	0.54	0.53	0.54	0.53	0.54	0.54	0.54	0.54	0.53	0.53	0.54	0.54	0.54	0.54	0.57	0.57	0.57	0.56	0.57	0.58	0.56	0.55	0.55	0.55	0.55	0.56	0.57	0.56	0.56	0.56	0.56	0.56	0.56	0.56	0.56	0.56	0.56	0.57	0.56	0.56
Alteripontixanthobacter maritimus HME9302	0.51	0.53	0.53	0.53	0.53	0.52	0.52	0.52	0.52	0.53	0.52	0.52	0.52	0.53	0.53	0.53	0.53	0.52	0.52	0.52	0.53	0.52	0.53	0.55	0.56	0.56	0.54	0.56	0.56	0.56	0.55	0.55	0.55	0.55	0.55	0.55	0.55	0.55	0.55	0.54	0.54	0.54	0.54	0.55	0.54	0.54	0.55	0.55	0.54
Alteripontixanthobacter muriae SALINAS58	0.51	0.54	0.54	0.54	0.54	0.53	0.53	0.52	0.52	0.53	0.52	0.53	0.53	0.53	0.53	0.53	0.53	0.53	0.52	0.52	0.53	0.52	0.53	0.56	0.56	0.56	0.55	0.57	0.57	0.55	0.55	0.55	0.54	0.55	0.55	0.55	0.55	0.55	0.54	0.54	0.55	0.54	0.54	0.55	0.54	0.54	0.55	0.55	0.54
Pseudopontixanthobacter vadosimaris JL3514	0.51	0.54	0.55	0.54	0.54	0.53	0.53	0.53	0.53	0.54	0.53	0.53	0.53	0.54	0.54	0.54	0.53	0.53	0.53	0.53	0.54	0.53	0.53	0.56	0.56	0.56	0.55	0.57	0.57	0.56	0.55	0.55	0.55	0.55	0.56	0.56	0.56	0.55	0.55	0.55	0.55	0.55	0.55	0.55	0.55	0.55	0.55	0.55	0.55
Altererythrobacter aquiaggeris NBRC 112425	0.51	0.54	0.54	0.53	0.53	0.53	0.53	0.52	0.52	0.53	0.52	0.52	0.53	0.53	0.53	0.53	0.53	0.53	0.52	0.53	0.53	0.53	0.53	0.55	0.56	0.56	0.54	0.56	0.56	0.56	0.55	0.55	0.55	0.54	0.55	0.55	0.55	0.55	0.54	0.54	0.54	0.54	0.54	0.55	0.54	0.54	0.55	0.54	0.54
Pontixanthobacter confluentis KCTC 52259	0.51	0.54	0.53	0.54	0.54	0.52	0.53	0.52	0.52	0.54	0.52	0.52	0.53	0.53	0.53	0.53	0.53	0.53	0.52	0.52	0.53	0.53	0.53	0.55	0.56	0.56	0.54	0.57	0.57	0.56	0.55	0.55	0.55	0.55	0.55	0.55	0.55	0.56	0.55	0.54	0.55	0.55	0.54	0.55	0.54	0.54	0.55	0.55	0.55
Pontixanthobacter sediminis KCTC 42453	0.51	0.54	0.53	0.53	0.54	0.52	0.52	0.52	0.52	0.53	0.52	0.53	0.53	0.53	0.54	0.53	0.53	0.53	0.52	0.52	0.53	0.53	0.53	0.55	0.56	0.56	0.55	0.56	0.56	0.56	0.55	0.55	0.55	0.55	0.55	0.55	0.55	0.56	0.55	0.54	0.55	0.54	0.55	0.55	0.55	0.55	0.55	0.55	0.54
Alteriqipengyuania abyssalis NZ-12B	0.5	0.53	0.54	0.53	0.53	0.52	0.53	0.52	0.52	0.53	0.51	0.52	0.52	0.53	0.53	0.53	0.52	0.52	0.52	0.52	0.53	0.52	0.53	0.55	0.55	0.55	0.53	0.56	0.56	0.56	0.54	0.54	0.54	0.55	0.55	0.55	0.55	0.55	0.55	0.54	0.54	0.54	0.54	0.55	0.54	0.54	0.55	0.54	0.54
Alteriqipengyuania lutimaris S-5	0.51	0.53	0.53	0.53	0.53	0.52	0.52	0.51	0.52	0.53	0.52	0.52	0.52	0.53	0.53	0.53	0.52	0.52	0.51	0.51	0.52	0.52	0.52	0.55	0.55	0.55	0.54	0.56	0.56	0.56	0.55	0.55	0.54	0.55	0.55	0.55	0.55	0.55	0.55	0.54	0.54	0.54	0.54	0.55	0.54	0.54	0.55	0.55	0.54
Parerythrobacter jejuensis JCM 16677	0.5	0.53	0.53	0.53	0.53	0.52	0.53	0.52	0.52	0.53	0.51	0.52	0.52	0.53	0.53	0.52	0.53	0.52	0.52	0.52	0.53	0.53	0.53	0.55	0.56	0.56	0.53	0.56	0.56	0.56	0.55	0.55	0.55	0.55	0.55	0.55	0.55	0.55	0.55	0.54	0.54	0.54	0.54	0.55	0.54	0.54	0.55	0.54	0.54
Parerythrobacter lutipelagi GH1-16	0.5	0.53	0.54	0.53	0.53	0.52	0.52	0.51	0.51	0.53	0.51	0.52	0.52	0.53	0.53	0.52	0.52	0.52	0.51	0.52	0.53	0.52	0.53	0.55	0.55	0.56	0.53	0.56	0.56	0.55	0.55	0.55	0.55	0.55	0.55	0.55	0.54	0.55	0.54	0.54	0.54	0.54	0.54	0.54	0.53	0.54	0.55	0.54	0.54
Pontixanthobacter luteolus SW-109	0.51	0.54	0.54	0.53	0.53	0.52	0.52	0.52	0.52	0.53	0.51	0.52	0.52	0.53	0.53	0.53	0.52	0.53	0.52	0.52	0.53	0.53	0.53	0.55	0.56	0.56	0.54	0.56	0.56	0.56	0.55	0.55	0.54	0.55	0.55	0.55	0.55	0.55	0.55	0.54	0.54	0.54	0.54	0.55	0.54	0.54	0.55	0.55	0.54
Pontixanthobacter gangjinensis JCM 17802	0.51	0.53	0.53	0.53	0.53	0.52	0.52	0.51	0.52	0.53	0.51	0.52	0.52	0.52	0.53	0.52	0.52	0.52	0.52	0.52	0.53	0.52	0.53	0.55	0.55	0.56	0.53	0.56	0.56	0.55	0.54	0.55	0.54	0.54	0.55	0.54	0.54	0.55	0.54	0.53	0.54	0.54	0.54	0.54	0.53	0.54	0.55	0.54	0.54
Pontixanthobacter rizhaonensis RZ02	0.51	0.53	0.53	0.53	0.53	0.52	0.52	0.52	0.51	0.53	0.51	0.51	0.52	0.52	0.53	0.52	0.53	0.52	0.51	0.52	0.53	0.52	0.53	0.55	0.56	0.56	0.54	0.56	0.56	0.55	0.55	0.55	0.54	0.54	0.55	0.54	0.54	0.55	0.54	0.53	0.54	0.53	0.53	0.54	0.54	0.53	0.54	0.54	0.53
Pontixanthobacter aquaemixtae KCTC 52763	0.51	0.53	0.53	0.53	0.53	0.51	0.52	0.51	0.51	0.53	0.51	0.51	0.52	0.53	0.53	0.52	0.52	0.52	0.51	0.52	0.53	0.52	0.52	0.54	0.55	0.56	0.53	0.56	0.56	0.56	0.55	0.55	0.54	0.55	0.55	0.55	0.54	0.55	0.54	0.53	0.54	0.54	0.54	0.54	0.53	0.54	0.55	0.54	0.54
Pontixanthobacter aestiaquae KCTC 42006	0.51	0.53	0.53	0.53	0.53	0.52	0.52	0.52	0.51	0.53	0.51	0.52	0.52	0.53	0.53	0.53	0.53	0.52	0.52	0.52	0.52	0.52	0.53	0.54	0.56	0.56	0.53	0.56	0.56	0.55	0.55	0.55	0.54	0.55	0.55	0.54	0.54	0.55	0.55	0.53	0.54	0.53	0.54	0.54	0.53	0.54	0.55	0.54	0.54
Altererythrobacter epoxidivorans CGMCC 1.7731	0.51	0.54	0.54	0.54	0.54	0.52	0.53	0.52	0.52	0.53	0.52	0.52	0.52	0.52	0.53	0.53	0.52	0.52	0.52	0.52	0.53	0.53	0.53	0.55	0.56	0.56	0.54	0.56	0.56	0.56	0.55	0.55	0.55	0.55	0.56	0.55	0.55	0.55	0.55	0.54	0.54	0.54	0.54	0.55	0.54	0.54	0.55	0.54	0.55
Altererythrobacter xiamenensis CGMCC 1.12494	0.51	0.53	0.54	0.53	0.53	0.52	0.53	0.51	0.52	0.53	0.51	0.52	0.52	0.52	0.53	0.52	0.52	0.52	0.51	0.52	0.53	0.53	0.53	0.55	0.56	0.56	0.53	0.56	0.56	0.56	0.55	0.55	0.55	0.55	0.55	0.55	0.55	0.55	0.54	0.54	0.54	0.54	0.54	0.55	0.54	0.54	0.55	0.55	0.54
Altererythrobacter lutimaris JGD-16	0.5	0.53	0.53	0.53	0.53	0.52	0.53	0.52	0.52	0.53	0.51	0.52	0.52	0.53	0.53	0.52	0.52	0.52	0.52	0.52	0.53	0.52	0.53	0.54	0.55	0.55	0.53	0.55	0.55	0.55	0.55	0.55	0.54	0.55	0.55	0.54	0.54	0.55	0.54	0.53	0.54	0.53	0.54	0.55	0.53	0.54	0.54	0.54	0.54
Altererythrobacter ishigakiensis NBRC 107699	0.51	0.54	0.54	0.53	0.53	0.53	0.53	0.52	0.52	0.53	0.52	0.52	0.53	0.53	0.53	0.53	0.53	0.52	0.52	0.53	0.53	0.53	0.53	0.55	0.56	0.56	0.54	0.56	0.56	0.56	0.55	0.55	0.55	0.55	0.55	0.55	0.55	0.55	0.55	0.54	0.54	0.54	0.54	0.55	0.54	0.54	0.55	0.54	0.54
Altererythrobacter insulae BPTF-M16	0.49	0.52	0.52	0.52	0.52	0.51	0.52	0.51	0.51	0.52	0.51	0.51	0.51	0.52	0.52	0.52	0.52	0.51	0.51	0.52	0.52	0.52	0.52	0.54	0.55	0.55	0.52	0.55	0.55	0.55	0.54	0.54	0.54	0.54	0.54	0.54	0.54	0.54	0.54	0.53	0.53	0.53	0.53	0.54	0.53	0.53	0.54	0.53	0.53
Erythrobacter litoralis DSM 8509	0.51	0.53	0.53	0.53	0.53	0.53	0.54	0.52	0.52	0.53	0.51	0.52	0.53	0.53	0.53	0.53	0.53	0.52	0.52	0.53	0.53	0.52	0.53	0.55	0.55	0.56	0.53	0.56	0.56	0.55	0.55	0.55	0.54	0.55	0.55	0.55	0.54	0.54	0.54	0.53	0.54	0.54	0.54	0.55	0.53	0.53	0.54	0.54	0.54
Erythrobacter aurantius C5	0.5	0.53	0.52	0.52	0.52	0.52	0.52	0.51	0.51	0.52	0.51	0.52	0.52	0.52	0.52	0.52	0.52	0.52	0.51	0.53	0.53	0.52	0.53	0.54	0.55	0.55	0.52	0.55	0.56	0.55	0.54	0.54	0.54	0.54	0.55	0.54	0.54	0.54	0.54	0.53	0.54	0.53	0.54	0.54	0.53	0.53	0.54	0.54	0.54
Erythrobacter longus DSM 6997	0.5	0.52	0.52	0.52	0.52	0.51	0.51	0.51	0.51	0.52	0.5	0.51	0.51	0.52	0.52	0.51	0.52	0.51	0.51	0.51	0.52	0.52	0.52	0.53	0.54	0.54	0.52	0.55	0.55	0.54	0.54	0.54	0.53	0.53	0.54	0.54	0.53	0.54	0.54	0.52	0.53	0.52	0.53	0.54	0.53	0.53	0.54	0.53	0.53
Erythrobacter ani WH131	0.5	0.52	0.53	0.52	0.52	0.52	0.52	0.51	0.51	0.52	0.51	0.51	0.52	0.52	0.53	0.52	0.52	0.52	0.51	0.52	0.52	0.52	0.52	0.54	0.55	0.55	0.52	0.55	0.55	0.55	0.54	0.54	0.54	0.54	0.54	0.54	0.54	0.54	0.54	0.53	0.53	0.53	0.53	0.54	0.53	0.53	0.54	0.53	0.53
Erythrobacter rubeus KMU-140	0.5	0.52	0.52	0.52	0.53	0.52	0.53	0.52	0.51	0.52	0.51	0.51	0.52	0.52	0.52	0.52	0.52	0.51	0.51	0.52	0.52	0.52	0.52	0.54	0.55	0.55	0.53	0.55	0.55	0.55	0.55	0.55	0.54	0.54	0.55	0.54	0.54	0.54	0.54	0.53	0.53	0.53	0.53	0.54	0.53	0.53	0.54	0.53	0.54
Erythrobacter crassostreae WH158	0.49	0.52	0.51	0.51	0.51	0.5	0.51	0.5	0.5	0.51	0.5	0.5	0.51	0.51	0.51	0.51	0.51	0.51	0.5	0.51	0.51	0.51	0.51	0.52	0.54	0.54	0.51	0.54	0.54	0.54	0.53	0.53	0.53	0.53	0.53	0.53	0.53	0.53	0.53	0.52	0.52	0.52	0.52	0.53	0.52	0.52	0.53	0.52	0.52
Erythrobacter insulae JBTF-M21	0.5	0.53	0.52	0.52	0.52	0.52	0.52	0.51	0.51	0.52	0.51	0.51	0.52	0.52	0.52	0.52	0.52	0.52	0.51	0.52	0.52	0.52	0.52	0.54	0.54	0.55	0.52	0.55	0.55	0.55	0.54	0.54	0.54	0.54	0.54	0.54	0.54	0.54	0.54	0.53	0.53	0.53	0.53	0.54	0.53	0.53	0.54	0.53	0.53
Erythrobacter tepidarius DSM 10594	0.52	0.54	0.53	0.54	0.54	0.54	0.54	0.53	0.53	0.54	0.52	0.53	0.54	0.54	0.54	0.53	0.53	0.53	0.53	0.54	0.54	0.54	0.54	0.55	0.56	0.56	0.54	0.56	0.56	0.56	0.55	0.55	0.55	0.55	0.55	0.55	0.55	0.55	0.55	0.54	0.55	0.55	0.55	0.56	0.54	0.54	0.55	0.55	0.54
Erythrobacter cryptus DSM 12079	0.52	0.54	0.54	0.54	0.54	0.54	0.55	0.53	0.53	0.54	0.53	0.54	0.54	0.54	0.54	0.54	0.54	0.54	0.53	0.55	0.55	0.54	0.54	0.56	0.56	0.56	0.54	0.57	0.57	0.56	0.55	0.55	0.55	0.56	0.56	0.56	0.56	0.56	0.56	0.55	0.55	0.55	0.55	0.56	0.55	0.55	0.56	0.55	0.55
Erythrobacter dokdonensis DSM 17193	0.51	0.54	0.53	0.53	0.53	0.53	0.54	0.52	0.52	0.53	0.52	0.53	0.53	0.54	0.54	0.53	0.53	0.53	0.53	0.53	0.54	0.54	0.54	0.55	0.56	0.56	0.53	0.56	0.56	0.56	0.55	0.55	0.55	0.55	0.55	0.55	0.55	0.55	0.55	0.54	0.55	0.54	0.55	0.56	0.54	0.54	0.55	0.54	0.54
Erythrobacter sanguineus JCM 20691	0.51	0.54	0.53	0.53	0.53	0.53	0.53	0.52	0.52	0.53	0.52	0.53	0.53	0.53	0.53	0.53	0.53	0.53	0.53	0.53	0.54	0.54	0.54	0.55	0.56	0.56	0.54	0.56	0.56	0.56	0.55	0.55	0.55	0.55	0.55	0.55	0.55	0.55	0.55	0.54	0.55	0.54	0.55	0.55	0.54	0.54	0.55	0.55	0.55
Erythrobacter ramosus JCM 10282	0.51	0.54	0.53	0.53	0.53	0.53	0.53	0.52	0.52	0.53	0.52	0.53	0.53	0.53	0.53	0.53	0.53	0.53	0.52	0.53	0.54	0.53	0.54	0.55	0.56	0.55	0.53	0.56	0.56	0.55	0.54	0.54	0.54	0.54	0.55	0.55	0.55	0.55	0.55	0.54	0.54	0.54	0.54	0.55	0.54	0.53	0.55	0.54	0.54
Erythrobacter donghaensis DSM 16220	0.51	0.54	0.53	0.53	0.53	0.53	0.53	0.52	0.52	0.53	0.52	0.52	0.53	0.53	0.53	0.53	0.53	0.53	0.52	0.53	0.54	0.53	0.54	0.55	0.55	0.56	0.53	0.56	0.56	0.56	0.55	0.55	0.54	0.55	0.55	0.55	0.55	0.55	0.55	0.54	0.54	0.54	0.54	0.55	0.54	0.54	0.55	0.54	0.54
Erythrobacter colymbi JCM 18338	0.51	0.53	0.53	0.53	0.53	0.53	0.53	0.52	0.53	0.53	0.52	0.52	0.52	0.53	0.53	0.53	0.53	0.53	0.52	0.53	0.54	0.53	0.53	0.55	0.55	0.55	0.53	0.55	0.56	0.55	0.54	0.54	0.54	0.54	0.55	0.55	0.55	0.55	0.55	0.54	0.54	0.54	0.54	0.55	0.54	0.53	0.55	0.54	0.54
Erythrobacter neustonensis DSM 9434	0.51	0.54	0.53	0.53	0.53	0.53	0.53	0.52	0.52	0.53	0.52	0.53	0.53	0.53	0.53	0.53	0.53	0.53	0.53	0.53	0.54	0.53	0.53	0.55	0.56	0.56	0.54	0.56	0.56	0.55	0.55	0.55	0.55	0.55	0.55	0.55	0.55	0.55	0.55	0.54	0.55	0.55	0.55	0.56	0.54	0.54	0.55	0.55	0.54
Qipengyuania oceanensis MCCC 1A09965	0.51	0.54	0.55	0.54	0.54	0.53	0.53	0.52	0.52	0.53	0.52	0.52	0.52	0.53	0.53	0.53	0.53	0.53	0.52	0.52	0.54	0.53	0.53	0.55	0.56	0.56	0.54	0.56	0.57	0.56	0.55	0.55	0.55	0.55	0.55	0.55	0.55	0.55	0.55	0.54	0.54	0.54	0.54	0.55	0.54	0.54	0.55	0.55	0.55
Parapontixanthobacter aurantiacus MCCC 1A09962	0.5096	0.5325	0.5386	0.5294	0.5302	0.5212	0.5223	0.5171	0.5173	0.5263	0.5144	0.5171	0.5184	0.5258	0.5243	0.5223	0.5232	0.5226	0.5163	0.5189	0.5267	0.5237	0.5283	0.5498	0.5569	0.5515	0.5409	0.5574	0.5596	0.5561	0.5449	0.5486	0.5459	0.5469	0.551	0.5487	0.5433	0.5515	0.5427	0.5371	0.5422	0.5362	0.5361	0.5427	0.5385	0.5405	0.5451	0.5434	0.5421
Actirhodobacter atriluteus HHU K3-1	0.5093	0.5372	0.5393	0.53	0.5328	0.5215	0.5229	0.5209	0.5201	0.5251	0.5175	0.5185	0.5217	0.5276	0.5288	0.5265	0.5248	0.5264	0.5185	0.5218	0.5276	0.5238	0.5301	0.5545	0.5565	0.5574	0.5434	0.5612	0.5616	0.5559	0.5466	0.5478	0.5452	0.5476	0.551	0.5513	0.5485	0.5513	0.5419	0.5414	0.5432	0.5355	0.5399	0.5428	0.5402	0.5432	0.5487	0.5453	0.5408
Qipengyuania sediminis CGMCC 1.12928	0.51	0.55	0.54	0.54	0.55	0.54	0.54	0.53	0.53	0.54	0.53	0.53	0.54	0.54	0.54	0.54	0.54	0.54	0.53	0.54	0.54	0.54	0.54	0.57	0.57	0.57	0.56	0.57	0.57	0.56	0.55	0.55	0.55	0.55	0.56	0.57	0.56	0.56	0.56	0.56	0.56	0.56	0.56	0.56	0.56	0.56	0.56	0.56	0.56
Qipengyuania algicida KEMB 9005-328	0.51	0.53	0.53	0.53	0.53	0.52	0.52	0.52	0.52	0.53	0.52	0.52	0.52	0.53	0.53	0.52	0.53	0.52	0.51	0.52	0.53	0.52	0.53	0.55	0.56	0.55	0.54	0.56	0.56	0.55	0.54	0.54	0.54	0.54	0.55	0.55	0.55	0.55	0.54	0.54	0.54	0.55	0.54	0.55	0.54	0.54	0.55	0.55	0.54
Qipengyuania marisflavi KEM-5	0.51	0.54	0.54	0.54	0.54	0.53	0.53	0.52	0.52	0.53	0.52	0.53	0.53	0.54	0.54	0.53	0.53	0.53	0.53	0.53	0.53	0.53	0.53	0.56	0.57	0.57	0.55	0.57	0.57	0.56	0.55	0.55	0.55	0.55	0.56	0.55	0.55	0.55	0.55	0.55	0.55	0.54	0.55	0.55	0.55	0.55	0.55	0.55	0.55
Qipengyuania pelagi JCM 17468	0.51	0.54	0.55	0.54	0.54	0.53	0.53	0.52	0.52	0.53	0.52	0.52	0.53	0.53	0.53	0.53	0.53	0.53	0.52	0.52	0.53	0.53	0.53	0.56	0.56	0.56	0.55	0.56	0.57	0.56	0.55	0.55	0.55	0.55	0.56	0.55	0.55	0.55	0.55	0.54	0.55	0.54	0.54	0.55	0.54	0.55	0.55	0.55	0.55
Qipengyuania proteolytica 6B39	0.51	0.53	0.53	0.53	0.53	0.53	0.53	0.51	0.52	0.53	0.52	0.52	0.52	0.53	0.53	0.53	0.53	0.53	0.52	0.53	0.53	0.53	0.53	0.55	0.56	0.56	0.54	0.56	0.56	0.56	0.55	0.55	0.55	0.55	0.56	0.55	0.55	0.56	0.55	0.54	0.54	0.54	0.54	0.55	0.54	0.54	0.55	0.55	0.55
Qipengyuania soli 6D36	0.51	0.54	0.53	0.54	0.53	0.53	0.53	0.52	0.52	0.54	0.52	0.53	0.52	0.53	0.53	0.53	0.53	0.53	0.52	0.53	0.53	0.53	0.53	0.55	0.56	0.56	0.54	0.56	0.57	0.56	0.55	0.55	0.54	0.55	0.55	0.55	0.55	0.56	0.55	0.54	0.55	0.54	0.54	0.55	0.54	0.54	0.55	0.55	0.55
Qipengyuania citrea CGMCC 1.8703	0.51	0.54	0.56	0.53	0.53	0.52	0.53	0.52	0.52	0.53	0.52	0.52	0.53	0.53	0.53	0.53	0.53	0.53	0.52	0.52	0.53	0.53	0.53	0.55	0.56	0.56	0.54	0.56	0.56	0.56	0.55	0.56	0.55	0.55	0.56	0.56	0.55	0.56	0.55	0.54	0.55	0.55	0.54	0.55	0.54	0.54	0.55	0.55	0.55
Qipengyuania flava DSM 16421	0.51	0.54	0.54	0.53	0.54	0.52	0.52	0.52	0.52	0.53	0.51	0.52	0.53	0.53	0.53	0.53	0.53	0.53	0.52	0.52	0.53	0.53	0.53	0.56	0.56	0.56	0.54	0.56	0.57	0.56	0.55	0.56	0.55	0.55	0.56	0.55	0.55	0.55	0.55	0.54	0.55	0.55	0.54	0.55	0.54	0.54	0.55	0.55	0.55
[truncated: 19 more rows]
[truncated: 380 more columns]

## Sheet: Table S6
Table S6. Evolutionary distances among Sphingomonadales type strain genomes.
[truncated: 430 more rows]
[truncated: 380 more columns]
